# Supplementary material
Source: publisher figshare collection journal article supplement (https://acs.figshare.com/ndownloader/files/5461445)
Supplement: Supplementary file 1 [file 5461445]

 
data_X16080 
  
_audit_creation_method            SHELXL-2014/6 
_chemical_name_systematic         ? 
_chemical_name_common             ? 
_chemical_melting_point           ? 
_chemical_formula_moiety          ? 
_chemical_formula_sum 
 'C25 H29 F3 N2 O5 S' 
_chemical_formula_weight          526.56 
  
loop_ 
 _atom_type_symbol 
 _atom_type_description 
 _atom_type_scat_dispersion_real 
 _atom_type_scat_dispersion_imag 
 _atom_type_scat_source 
 'C'  'C'   0.0033   0.0016 
 'International Tables Vol C Tables 4.2.6.8 and 6.1.1.4' 
 'H'  'H'   0.0000   0.0000 
 'International Tables Vol C Tables 4.2.6.8 and 6.1.1.4' 
 'N'  'N'   0.0061   0.0033 
 'International Tables Vol C Tables 4.2.6.8 and 6.1.1.4' 
 'O'  'O'   0.0106   0.0060 
 'International Tables Vol C Tables 4.2.6.8 and 6.1.1.4' 
 'F'  'F'   0.0171   0.0103 
 'International Tables Vol C Tables 4.2.6.8 and 6.1.1.4' 
 'S'  'S'   0.1246   0.1234 
 'International Tables Vol C Tables 4.2.6.8 and 6.1.1.4' 
  
_space_group_crystal_system       monoclinic 
_space_group_IT_number            14 
_space_group_name_H-M_alt         'P 21/n' 
_space_group_name_Hall            '-P 2yn' 
  
_shelx_space_group_comment 
; 
The symmetry employed for this shelxl refinement is uniquely defined 
by the following loop, which should always be used as a source of 
symmetry information in preference to the above space-group names. 
They are only intended as comments. 
; 
  
loop_ 
 _space_group_symop_operation_xyz 
 'x, y, z' 
 '-x+1/2, y+1/2, -z+1/2' 
 '-x, -y, -z' 
 'x-1/2, -y-1/2, z-1/2' 
  
_cell_length_a                    8.7865(8) 
_cell_length_b                    21.4221(18) 
_cell_length_c                    13.4402(11) 
_cell_angle_alpha                 90 
_cell_angle_beta                  94.5721(17) 
_cell_angle_gamma                 90 
_cell_volume                      2521.7(4) 
_cell_formula_units_Z             4 
_cell_measurement_temperature     100(2) 
_cell_measurement_reflns_used     9806 
_cell_measurement_theta_min       2.43 
_cell_measurement_theta_max       30.52 
  
_exptl_crystal_description        block 
_exptl_crystal_colour             colourless 
_exptl_crystal_density_meas       . 
_exptl_crystal_density_method     'not measured' 
_exptl_crystal_density_diffrn     1.387 
_exptl_crystal_F_000              1104 
_exptl_transmission_factor_min    ? 
_exptl_transmission_factor_max    ? 
_exptl_crystal_size_max           0.655 
_exptl_crystal_size_mid           0.335 
_exptl_crystal_size_min           0.315 
_exptl_absorpt_coefficient_mu     0.189 
_shelx_estimated_absorpt_T_min    0.886 
_shelx_estimated_absorpt_T_max    0.943 
_exptl_absorpt_correction_type    multi-scan 
_exptl_absorpt_correction_T_min   0.7006  
_exptl_absorpt_correction_T_max   0.7462  
_exptl_absorpt_process_details    'SADABS (Sheldrick, 2009)' 
_exptl_absorpt_special_details    ? 
_diffrn_ambient_temperature       100(2) 
_diffrn_radiation_wavelength      0.71073 
_diffrn_radiation_type            MoK\a 
_diffrn_source                    'I\mS micro-focus sealed tube, multilayer optics' 
_diffrn_measurement_device_type   'Bruker Smart APEX2 CCD' 
_diffrn_measurement_method        '\f and \w scans' 
_diffrn_detector_area_resol_mean  8.3 
_diffrn_reflns_number             43997 
_diffrn_reflns_av_unetI/netI      0.0331 
_diffrn_reflns_av_R_equivalents   0.0441 
_diffrn_reflns_limit_h_min        -12 
_diffrn_reflns_limit_h_max        12 
_diffrn_reflns_limit_k_min        -29 
_diffrn_reflns_limit_k_max        29 
_diffrn_reflns_limit_l_min        -17 
_diffrn_reflns_limit_l_max        18 
_diffrn_reflns_theta_min          1.793 
_diffrn_reflns_theta_max          29.575 
_diffrn_reflns_theta_full         25.242 
_diffrn_measured_fraction_theta_max   0.999 
_diffrn_measured_fraction_theta_full  1.000 
_diffrn_reflns_Laue_measured_fraction_max    0.999 
_diffrn_reflns_Laue_measured_fraction_full   1.000 
_diffrn_reflns_point_group_measured_fraction_max   0.999 
_diffrn_reflns_point_group_measured_fraction_full  1.000 
_reflns_number_total              7070 
_reflns_number_gt                 5816 
_reflns_threshold_expression      'I > 2\s(I)' 
_reflns_Friedel_coverage          0.000 
_reflns_Friedel_fraction_max      . 
_reflns_Friedel_fraction_full     . 
  
_reflns_special_details 
; 
 Reflections were merged by SHELXL according to the crystal 
 class for the calculation of statistics and refinement. 
  
 _reflns_Friedel_fraction is defined as the number of unique 
 Friedel pairs measured divided by the number that would be 
 possible theoretically, ignoring centric projections and 
 systematic absences. 
; 
  
_computing_data_collection        'APEX2 v2011.4.0 (Bruker-AXS, 2015)' 
_computing_cell_refinement        'SAINT 7.46A (Bruker-AXS, 2015)' 
_computing_data_reduction         'SAINT 7.46A (Bruker-AXS, 2015)' 
_computing_structure_solution     'SHELXS-2015 (Sheldrick, 2015)' 
_computing_structure_refinement 'SHELXL-2014/6 (Sheldrick, 2014)' 
_computing_molecular_graphics     'Bruker SHELXTL' 
_computing_publication_material   'Bruker SHELXTL' 
_refine_special_details 
; 
 It is possible that the triflate is disordered over two positions,
 however such a model was not stable.

 Bruker X8 Kappa DUO four-circle diffractometer, Bruker APEX2 CCD. 
 The instrument was purchased with the help of funding from the 
 National Science Foundation (NSF) under Grant Number 
 CHE-0946721.  Please acknowledge this grant in all publications 
 of this structure. 
; 
_refine_ls_structure_factor_coef  Fsqd 
_refine_ls_matrix_type            full 
_refine_ls_weighting_scheme       calc 
_refine_ls_weighting_details 
'w=1/[\s^2^(Fo^2^)+(0.0457P)^2^+1.2873P] where P=(Fo^2^+2Fc^2^)/3' 
_atom_sites_solution_primary      direct 
_atom_sites_solution_secondary    difmap 
_atom_sites_solution_hydrogens    geom 
_refine_ls_hydrogen_treatment     constr 
_refine_ls_extinction_method      none 
_refine_ls_extinction_coef        . 
_refine_ls_number_reflns          7070 
_refine_ls_number_parameters      333 
_refine_ls_number_restraints      0 
_refine_ls_R_factor_all           0.0528 
_refine_ls_R_factor_gt            0.0419 
_refine_ls_wR_factor_ref          0.1081 
_refine_ls_wR_factor_gt           0.1020 
_refine_ls_goodness_of_fit_ref    1.058 
_refine_ls_restrained_S_all       1.058 
_refine_ls_shift/su_max           0.001 
_refine_ls_shift/su_mean          0.000 
  
loop_ 
 _atom_site_label 
 _atom_site_type_symbol 
 _atom_site_fract_x 
 _atom_site_fract_y 
 _atom_site_fract_z 
 _atom_site_U_iso_or_equiv 
 _atom_site_adp_type 
 _atom_site_occupancy 
 _atom_site_site_symmetry_order 
 _atom_site_calc_flag 
 _atom_site_refinement_flags_posn 
 _atom_site_refinement_flags_adp 
 _atom_site_refinement_flags_occupancy 
 _atom_site_disorder_assembly 
 _atom_site_disorder_group 
O1 O 0.88148(12) 0.13120(5) 0.40704(8) 0.0217(2) Uani 1 1 d . . . . . 
O2 O 0.76180(11) 0.33356(5) 0.49675(7) 0.0184(2) Uani 1 1 d . . . . . 
C1 C 0.72622(14) 0.25553(6) 0.26920(10) 0.0123(2) Uani 1 1 d . . . . . 
H1 H 0.6859 0.2637 0.2028 0.015 Uiso 1 1 calc R U . . . 
C2 C 0.78304(14) 0.29405(6) 0.43670(10) 0.0142(2) Uani 1 1 d . . . . . 
C3 C 0.89396(15) 0.24008(7) 0.45296(10) 0.0151(3) Uani 1 1 d . . . . . 
C4 C 0.85281(14) 0.18430(6) 0.38714(10) 0.0148(3) Uani 1 1 d . . . . . 
C5 C 1.04788(15) 0.26613(7) 0.41967(11) 0.0190(3) Uani 1 1 d . . . . . 
H5A H 1.1260 0.2334 0.4265 0.029 Uiso 1 1 calc R U . . . 
H5B H 1.0805 0.3018 0.4618 0.029 Uiso 1 1 calc R U . . . 
H5C H 1.0338 0.2795 0.3498 0.029 Uiso 1 1 calc R U . . . 
C6 C 0.91369(16) 0.22044(8) 0.56200(11) 0.0205(3) Uani 1 1 d . . . . . 
H6A H 0.8176 0.2030 0.5819 0.031 Uiso 1 1 calc R U . . . 
H6B H 0.9419 0.2569 0.6036 0.031 Uiso 1 1 calc R U . . . 
H6C H 0.9943 0.1888 0.5708 0.031 Uiso 1 1 calc R U . . . 
N1 N 0.78632(12) 0.19991(5) 0.28827(8) 0.0126(2) Uani 1 1 d . . . . . 
C11 C 0.78197(15) 0.15333(6) 0.20886(10) 0.0135(2) Uani 1 1 d . . . . . 
C12 C 0.64587(15) 0.12203(6) 0.18141(10) 0.0147(3) Uani 1 1 d . . . . . 
C13 C 0.64548(16) 0.08067(6) 0.10143(11) 0.0169(3) Uani 1 1 d . . . . . 
H13 H 0.5534 0.0596 0.0801 0.020 Uiso 1 1 calc R U . . . 
C14 C 0.77554(16) 0.06920(6) 0.05173(11) 0.0171(3) Uani 1 1 d . . . . . 
C15 C 0.90981(16) 0.10045(6) 0.08366(11) 0.0170(3) Uani 1 1 d . . . . . 
H15 H 0.9994 0.0928 0.0504 0.020 Uiso 1 1 calc R U . . . 
C16 C 0.91636(15) 0.14239(6) 0.16268(10) 0.0149(3) Uani 1 1 d . . . . . 
C17 C 0.50396(16) 0.12920(7) 0.23631(11) 0.0197(3) Uani 1 1 d . . . . . 
H17A H 0.5295 0.1507 0.2998 0.030 Uiso 1 1 calc R U . . . 
H17B H 0.4619 0.0879 0.2493 0.030 Uiso 1 1 calc R U . . . 
H17C H 0.4281 0.1537 0.1956 0.030 Uiso 1 1 calc R U . . . 
C18 C 0.77243(19) 0.02189(7) -0.03134(12) 0.0240(3) Uani 1 1 d . . . . . 
H18A H 0.8667 0.0251 -0.0654 0.036 Uiso 1 1 calc R U . . . 
H18B H 0.6845 0.0300 -0.0791 0.036 Uiso 1 1 calc R U . . . 
H18C H 0.7641 -0.0202 -0.0035 0.036 Uiso 1 1 calc R U . . . 
C19 C 1.06423(15) 0.17388(7) 0.19763(11) 0.0179(3) Uani 1 1 d . . . . . 
H19A H 1.1416 0.1643 0.1512 0.027 Uiso 1 1 calc R U . . . 
H19B H 1.0988 0.1587 0.2644 0.027 Uiso 1 1 calc R U . . . 
H19C H 1.0486 0.2191 0.2000 0.027 Uiso 1 1 calc R U . . . 
N2 N 0.71782(12) 0.30087(5) 0.33572(8) 0.0123(2) Uani 1 1 d . . . . . 
C21 C 0.63215(14) 0.35700(6) 0.30489(10) 0.0133(2) Uani 1 1 d . . . . . 
C22 C 0.47332(15) 0.35261(6) 0.28908(10) 0.0138(2) Uani 1 1 d . . . . . 
C23 C 0.39575(15) 0.40442(6) 0.24884(11) 0.0173(3) Uani 1 1 d . . . . . 
H23 H 0.2881 0.4022 0.2352 0.021 Uiso 1 1 calc R U . . . 
C24 C 0.47079(16) 0.45935(6) 0.22802(11) 0.0189(3) Uani 1 1 d . . . . . 
C25 C 0.62858(16) 0.46254(6) 0.24999(11) 0.0188(3) Uani 1 1 d . . . . . 
H25 H 0.6800 0.5006 0.2386 0.023 Uiso 1 1 calc R U . . . 
C26 C 0.71242(15) 0.41190(6) 0.28797(10) 0.0149(3) Uani 1 1 d . . . . . 
C27 C 0.38433(15) 0.29595(7) 0.31592(11) 0.0177(3) Uani 1 1 d . . . . . 
H27A H 0.4368 0.2582 0.2955 0.027 Uiso 1 1 calc R U . . . 
H27B H 0.2818 0.2976 0.2815 0.027 Uiso 1 1 calc R U . . . 
H27C H 0.3764 0.2951 0.3882 0.027 Uiso 1 1 calc R U . . . 
C28 C 0.3823(2) 0.51395(7) 0.18308(15) 0.0317(4) Uani 1 1 d . . . . . 
H28A H 0.3344 0.5366 0.2357 0.048 Uiso 1 1 calc R U . . . 
H28B H 0.3031 0.4989 0.1334 0.048 Uiso 1 1 calc R U . . . 
H28C H 0.4516 0.5419 0.1508 0.048 Uiso 1 1 calc R U . . . 
C29 C 0.88311(15) 0.41643(7) 0.30918(12) 0.0193(3) Uani 1 1 d . . . . . 
H29A H 0.9183 0.4571 0.2869 0.029 Uiso 1 1 calc R U . . . 
H29B H 0.9325 0.3832 0.2734 0.029 Uiso 1 1 calc R U . . . 
H29C H 0.9095 0.4119 0.3811 0.029 Uiso 1 1 calc R U . . . 
S1 S 0.47761(4) 0.18194(2) 0.55273(3) 0.01578(8) Uani 1 1 d . . . . . 
O3 O 0.56360(11) 0.20410(5) 0.47261(8) 0.0186(2) Uani 1 1 d . . . . . 
O4 O 0.56781(12) 0.16582(5) 0.64321(8) 0.0251(2) Uani 1 1 d . . . . . 
O5 O 0.34201(12) 0.21725(6) 0.56800(9) 0.0301(3) Uani 1 1 d . . . . . 
C7 C 0.4008(2) 0.10821(8) 0.50444(13) 0.0329(4) Uani 1 1 d . . . . . 
F1 F 0.32288(18) 0.07896(6) 0.57115(9) 0.0643(5) Uani 1 1 d . . . . . 
F2 F 0.30574(13) 0.11847(6) 0.42260(8) 0.0417(3) Uani 1 1 d . . . . . 
F3 F 0.50978(17) 0.07035(5) 0.47885(10) 0.0538(4) Uani 1 1 d . . . . . 
  
loop_ 
 _atom_site_aniso_label 
 _atom_site_aniso_U_11 
 _atom_site_aniso_U_22 
 _atom_site_aniso_U_33 
 _atom_site_aniso_U_23 
 _atom_site_aniso_U_13 
 _atom_site_aniso_U_12 
O1 0.0252(5) 0.0202(5) 0.0195(5) 0.0036(4) 0.0004(4) 0.0060(4) 
O2 0.0183(5) 0.0224(5) 0.0146(5) -0.0040(4) 0.0020(4) -0.0012(4) 
C1 0.0093(5) 0.0150(6) 0.0128(6) 0.0006(5) 0.0015(4) -0.0014(4) 
C2 0.0112(5) 0.0188(6) 0.0126(6) 0.0008(5) 0.0007(5) -0.0027(5) 
C3 0.0116(6) 0.0209(7) 0.0127(6) 0.0009(5) -0.0004(5) 0.0009(5) 
C4 0.0106(5) 0.0208(6) 0.0130(6) 0.0022(5) 0.0012(5) 0.0017(5) 
C5 0.0110(6) 0.0262(7) 0.0199(7) 0.0006(6) 0.0011(5) -0.0014(5) 
C6 0.0184(6) 0.0299(8) 0.0127(6) 0.0026(6) -0.0024(5) 0.0006(6) 
N1 0.0115(5) 0.0141(5) 0.0123(5) 0.0000(4) 0.0009(4) 0.0004(4) 
C11 0.0159(6) 0.0126(6) 0.0121(6) 0.0003(5) 0.0017(5) 0.0018(5) 
C12 0.0146(6) 0.0135(6) 0.0160(6) 0.0025(5) 0.0018(5) 0.0014(5) 
C13 0.0178(6) 0.0152(6) 0.0175(7) 0.0003(5) -0.0002(5) -0.0007(5) 
C14 0.0222(7) 0.0138(6) 0.0154(7) 0.0011(5) 0.0020(5) 0.0028(5) 
C15 0.0183(6) 0.0158(6) 0.0176(7) 0.0004(5) 0.0052(5) 0.0034(5) 
C16 0.0149(6) 0.0138(6) 0.0162(6) 0.0028(5) 0.0033(5) 0.0018(5) 
C17 0.0158(6) 0.0228(7) 0.0211(7) -0.0034(6) 0.0046(5) -0.0027(5) 
C18 0.0281(8) 0.0219(7) 0.0224(8) -0.0061(6) 0.0042(6) 0.0006(6) 
C19 0.0135(6) 0.0198(7) 0.0208(7) -0.0004(5) 0.0037(5) 0.0001(5) 
N2 0.0114(5) 0.0140(5) 0.0114(5) 0.0002(4) 0.0002(4) 0.0002(4) 
C21 0.0140(6) 0.0132(6) 0.0125(6) -0.0011(5) 0.0004(5) 0.0017(4) 
C22 0.0142(6) 0.0151(6) 0.0121(6) -0.0016(5) 0.0013(5) -0.0002(5) 
C23 0.0154(6) 0.0171(6) 0.0189(7) -0.0015(5) -0.0010(5) 0.0011(5) 
C24 0.0212(7) 0.0145(6) 0.0206(7) -0.0009(5) -0.0009(5) 0.0026(5) 
C25 0.0217(7) 0.0123(6) 0.0225(7) -0.0020(5) 0.0019(6) -0.0023(5) 
C26 0.0154(6) 0.0151(6) 0.0144(6) -0.0035(5) 0.0018(5) -0.0018(5) 
C27 0.0132(6) 0.0184(6) 0.0214(7) 0.0028(5) 0.0010(5) -0.0016(5) 
C28 0.0287(8) 0.0172(7) 0.0478(11) 0.0049(7) -0.0066(7) 0.0030(6) 
C29 0.0159(6) 0.0180(7) 0.0242(7) -0.0023(6) 0.0026(5) -0.0032(5) 
S1 0.01435(15) 0.01745(16) 0.01543(17) -0.00110(12) 0.00042(12) -0.00216(12) 
O3 0.0178(5) 0.0201(5) 0.0177(5) 0.0027(4) 0.0008(4) -0.0034(4) 
O4 0.0250(5) 0.0300(6) 0.0193(5) 0.0066(5) -0.0036(4) -0.0044(4) 
O5 0.0194(5) 0.0431(7) 0.0279(6) -0.0088(5) 0.0019(5) 0.0077(5) 
C7 0.0479(10) 0.0297(9) 0.0223(8) -0.0041(7) 0.0106(7) -0.0193(8) 
F1 0.1021(11) 0.0617(8) 0.0320(6) -0.0065(6) 0.0223(7) -0.0622(8) 
F2 0.0426(6) 0.0577(7) 0.0249(5) -0.0140(5) 0.0032(5) -0.0279(5) 
F3 0.0906(10) 0.0188(5) 0.0533(8) -0.0059(5) 0.0131(7) 0.0048(6) 
  
_geom_special_details 
; 
 All esds (except the esd in the dihedral angle between two l.s. planes) 
 are estimated using the full covariance matrix.  The cell esds are taken 
 into account individually in the estimation of esds in distances, angles 
 and torsion angles; correlations between esds in cell parameters are only 
 used when they are defined by crystal symmetry.  An approximate (isotropic) 
 treatment of cell esds is used for estimating esds involving l.s. planes. 
; 
  
loop_ 
 _geom_bond_atom_site_label_1 
 _geom_bond_atom_site_label_2 
 _geom_bond_distance 
 _geom_bond_site_symmetry_2 
 _geom_bond_publ_flag 
O1 C4 1.1911(17) . ? 
O2 C2 1.1946(17) . ? 
C1 N1 1.3200(17) . ? 
C1 N2 1.3262(17) . ? 
C1 H1 0.9500 . ? 
C2 N2 1.4380(17) . ? 
C2 C3 1.5167(19) . ? 
C3 C4 1.5132(19) . ? 
C3 C6 1.5213(19) . ? 
C3 C5 1.5611(18) . ? 
C4 N1 1.4474(17) . ? 
C5 H5A 0.9800 . ? 
C5 H5B 0.9800 . ? 
C5 H5C 0.9800 . ? 
C6 H6A 0.9800 . ? 
C6 H6B 0.9800 . ? 
C6 H6C 0.9800 . ? 
N1 C11 1.4593(17) . ? 
C11 C12 1.3948(18) . ? 
C11 C16 1.3969(18) . ? 
C12 C13 1.3928(19) . ? 
C12 C17 1.5065(18) . ? 
C13 C14 1.3907(19) . ? 
C13 H13 0.9500 . ? 
C14 C15 1.394(2) . ? 
C14 C18 1.507(2) . ? 
C15 C16 1.3889(19) . ? 
C15 H15 0.9500 . ? 
C16 C19 1.5055(19) . ? 
C17 H17A 0.9800 . ? 
C17 H17B 0.9800 . ? 
C17 H17C 0.9800 . ? 
C18 H18A 0.9800 . ? 
C18 H18B 0.9800 . ? 
C18 H18C 0.9800 . ? 
C19 H19A 0.9800 . ? 
C19 H19B 0.9800 . ? 
C19 H19C 0.9800 . ? 
N2 C21 1.4609(16) . ? 
C21 C22 1.3980(18) . ? 
C21 C26 1.3992(18) . ? 
C22 C23 1.3892(19) . ? 
C22 C27 1.5033(19) . ? 
C23 C24 1.388(2) . ? 
C23 H23 0.9500 . ? 
C24 C25 1.396(2) . ? 
C24 C28 1.504(2) . ? 
C25 C26 1.386(2) . ? 
C25 H25 0.9500 . ? 
C26 C29 1.5073(19) . ? 
C27 H27A 0.9800 . ? 
C27 H27B 0.9800 . ? 
C27 H27C 0.9800 . ? 
C28 H28A 0.9800 . ? 
C28 H28B 0.9800 . ? 
C28 H28C 0.9800 . ? 
C29 H29A 0.9800 . ? 
C29 H29B 0.9800 . ? 
C29 H29C 0.9800 . ? 
S1 O5 1.4397(11) . ? 
S1 O4 1.4397(11) . ? 
S1 O3 1.4440(10) . ? 
S1 C7 1.8171(17) . ? 
C7 F3 1.321(2) . ? 
C7 F1 1.3278(19) . ? 
C7 F2 1.345(2) . ? 
  
loop_ 
 _geom_angle_atom_site_label_1 
 _geom_angle_atom_site_label_2 
 _geom_angle_atom_site_label_3 
 _geom_angle 
 _geom_angle_site_symmetry_1 
 _geom_angle_site_symmetry_3 
 _geom_angle_publ_flag 
N1 C1 N2 124.97(13) . . ? 
N1 C1 H1 117.5 . . ? 
N2 C1 H1 117.5 . . ? 
O2 C2 N2 119.58(12) . . ? 
O2 C2 C3 125.18(13) . . ? 
N2 C2 C3 114.62(11) . . ? 
C4 C3 C2 113.38(11) . . ? 
C4 C3 C6 110.40(12) . . ? 
C2 C3 C6 111.85(11) . . ? 
C4 C3 C5 106.66(11) . . ? 
C2 C3 C5 104.34(11) . . ? 
C6 C3 C5 109.88(11) . . ? 
O1 C4 N1 119.31(13) . . ? 
O1 C4 C3 125.91(13) . . ? 
N1 C4 C3 114.49(11) . . ? 
C3 C5 H5A 109.5 . . ? 
C3 C5 H5B 109.5 . . ? 
H5A C5 H5B 109.5 . . ? 
C3 C5 H5C 109.5 . . ? 
H5A C5 H5C 109.5 . . ? 
H5B C5 H5C 109.5 . . ? 
C3 C6 H6A 109.5 . . ? 
C3 C6 H6B 109.5 . . ? 
H6A C6 H6B 109.5 . . ? 
C3 C6 H6C 109.5 . . ? 
H6A C6 H6C 109.5 . . ? 
H6B C6 H6C 109.5 . . ? 
C1 N1 C4 120.84(11) . . ? 
C1 N1 C11 119.24(11) . . ? 
C4 N1 C11 119.91(11) . . ? 
C12 C11 C16 122.62(12) . . ? 
C12 C11 N1 119.61(11) . . ? 
C16 C11 N1 117.77(12) . . ? 
C13 C12 C11 117.34(12) . . ? 
C13 C12 C17 119.45(12) . . ? 
C11 C12 C17 123.16(12) . . ? 
C14 C13 C12 122.10(13) . . ? 
C14 C13 H13 118.9 . . ? 
C12 C13 H13 118.9 . . ? 
C13 C14 C15 118.36(13) . . ? 
C13 C14 C18 120.51(13) . . ? 
C15 C14 C18 121.07(13) . . ? 
C16 C15 C14 121.91(12) . . ? 
C16 C15 H15 119.0 . . ? 
C14 C15 H15 119.0 . . ? 
C15 C16 C11 117.60(12) . . ? 
C15 C16 C19 120.70(12) . . ? 
C11 C16 C19 121.69(12) . . ? 
C12 C17 H17A 109.5 . . ? 
C12 C17 H17B 109.5 . . ? 
H17A C17 H17B 109.5 . . ? 
C12 C17 H17C 109.5 . . ? 
H17A C17 H17C 109.5 . . ? 
H17B C17 H17C 109.5 . . ? 
C14 C18 H18A 109.5 . . ? 
C14 C18 H18B 109.5 . . ? 
H18A C18 H18B 109.5 . . ? 
C14 C18 H18C 109.5 . . ? 
H18A C18 H18C 109.5 . . ? 
H18B C18 H18C 109.5 . . ? 
C16 C19 H19A 109.5 . . ? 
C16 C19 H19B 109.5 . . ? 
H19A C19 H19B 109.5 . . ? 
C16 C19 H19C 109.5 . . ? 
H19A C19 H19C 109.5 . . ? 
H19B C19 H19C 109.5 . . ? 
C1 N2 C2 121.49(11) . . ? 
C1 N2 C21 117.82(11) . . ? 
C2 N2 C21 120.59(11) . . ? 
C22 C21 C26 122.81(12) . . ? 
C22 C21 N2 118.25(11) . . ? 
C26 C21 N2 118.88(11) . . ? 
C23 C22 C21 117.28(12) . . ? 
C23 C22 C27 119.34(12) . . ? 
C21 C22 C27 123.36(12) . . ? 
C24 C23 C22 121.97(13) . . ? 
C24 C23 H23 119.0 . . ? 
C22 C23 H23 119.0 . . ? 
C23 C24 C25 118.59(13) . . ? 
C23 C24 C28 120.09(13) . . ? 
C25 C24 C28 121.33(13) . . ? 
C26 C25 C24 121.97(13) . . ? 
C26 C25 H25 119.0 . . ? 
C24 C25 H25 119.0 . . ? 
C25 C26 C21 117.25(12) . . ? 
C25 C26 C29 120.73(12) . . ? 
C21 C26 C29 122.02(12) . . ? 
C22 C27 H27A 109.5 . . ? 
C22 C27 H27B 109.5 . . ? 
H27A C27 H27B 109.5 . . ? 
C22 C27 H27C 109.5 . . ? 
H27A C27 H27C 109.5 . . ? 
H27B C27 H27C 109.5 . . ? 
C24 C28 H28A 109.5 . . ? 
C24 C28 H28B 109.5 . . ? 
H28A C28 H28B 109.5 . . ? 
C24 C28 H28C 109.5 . . ? 
H28A C28 H28C 109.5 . . ? 
H28B C28 H28C 109.5 . . ? 
C26 C29 H29A 109.5 . . ? 
C26 C29 H29B 109.5 . . ? 
H29A C29 H29B 109.5 . . ? 
C26 C29 H29C 109.5 . . ? 
H29A C29 H29C 109.5 . . ? 
H29B C29 H29C 109.5 . . ? 
O5 S1 O4 114.32(7) . . ? 
O5 S1 O3 114.95(7) . . ? 
O4 S1 O3 115.03(6) . . ? 
O5 S1 C7 102.68(8) . . ? 
O4 S1 C7 104.89(8) . . ? 
O3 S1 C7 102.76(7) . . ? 
F3 C7 F1 108.03(16) . . ? 
F3 C7 F2 107.65(14) . . ? 
F1 C7 F2 108.02(15) . . ? 
F3 C7 S1 111.73(13) . . ? 
F1 C7 S1 111.46(12) . . ? 
F2 C7 S1 109.81(13) . . ? 
  
_refine_diff_density_max    0.670 
_refine_diff_density_min   -0.517 
_refine_diff_density_rms    0.056 
  
_shelxl_version_number 2014/6 
  
_shelx_res_file 
; 
TITL X16080 in P2(1)/n 
CELL 0.71073   8.78650  21.42210  13.44020  90.0000  94.5721  90.0000 
ZERR    4.00   0.00080   0.00180   0.00110   0.0000   0.0017   0.0000 
LATT  1 
SYMM 0.5-X, 0.5+Y, 0.5-Z 
SFAC C H N O F S 
UNIT 100 116 8 20 12 4 
TEMP -173 
SIZE 0.315 0.335 0.655 
  
WPDB -2 
ACTA 
  
OMIT    -3   1   3    ! outlier, Fo > Fc 
  
L.S. 10 
BOND $H 
FMAP 2 
PLAN 20 
  
REM  sump 0.7 0 1 2 
  
WGHT    0.045700    1.287300 
FVAR       0.11840 
O1    4    0.881475    0.131195    0.407040    11.00000    0.02522    0.02019 = 
         0.01955    0.00360    0.00041    0.00598 
O2    4    0.761796    0.333565    0.496751    11.00000    0.01828    0.02243 = 
         0.01463   -0.00403    0.00201   -0.00120 
C1    1    0.726216    0.255527    0.269203    11.00000    0.00932    0.01501 = 
         0.01277    0.00059    0.00151   -0.00142 
AFIX  43 
H1    2    0.685913    0.263692    0.202784    11.00000   -1.20000 
AFIX   0 
C2    1    0.783040    0.294046    0.436698    11.00000    0.01123    0.01877 = 
         0.01264    0.00076    0.00074   -0.00270 
C3    1    0.893956    0.240076    0.452959    11.00000    0.01164    0.02088 = 
         0.01268    0.00090   -0.00036    0.00094 
C4    1    0.852806    0.184305    0.387137    11.00000    0.01064    0.02077 = 
         0.01301    0.00219    0.00120    0.00171 
C5    1    1.047876    0.266127    0.419670    11.00000    0.01101    0.02624 = 
         0.01986    0.00061    0.00107   -0.00138 
AFIX 137 
H5A   2    1.125958    0.233407    0.426530    11.00000   -1.50000 
H5B   2    1.080471    0.301806    0.461761    11.00000   -1.50000 
H5C   2    1.033824    0.279521    0.349822    11.00000   -1.50000 
AFIX   0 
C6    1    0.913695    0.220443    0.562003    11.00000    0.01836    0.02987 = 
         0.01275    0.00264   -0.00244    0.00059 
AFIX 137 
H6A   2    0.817582    0.202969    0.581854    11.00000   -1.50000 
H6B   2    0.941922    0.256867    0.603573    11.00000   -1.50000 
H6C   2    0.994297    0.188846    0.570828    11.00000   -1.50000 
AFIX   0 
N1    3    0.786316    0.199911    0.288268    11.00000    0.01148    0.01410 = 
         0.01226   -0.00002    0.00086    0.00035 
C11   1    0.781971    0.153333    0.208864    11.00000    0.01593    0.01259 = 
         0.01206    0.00026    0.00168    0.00176 
C12   1    0.645874    0.122027    0.181411    11.00000    0.01461    0.01348 = 
         0.01598    0.00248    0.00182    0.00136 
C13   1    0.645478    0.080670    0.101426    11.00000    0.01778    0.01523 = 
         0.01745    0.00027   -0.00020   -0.00073 
AFIX  43 
H13   2    0.553422    0.059621    0.080140    11.00000   -1.20000 
AFIX   0 
C14   1    0.775536    0.069204    0.051728    11.00000    0.02217    0.01380 = 
         0.01540    0.00110    0.00202    0.00280 
C15   1    0.909806    0.100451    0.083658    11.00000    0.01830    0.01576 = 
         0.01763    0.00039    0.00518    0.00338 
AFIX  43 
H15   2    0.999419    0.092835    0.050401    11.00000   -1.20000 
AFIX   0 
C16   1    0.916360    0.142394    0.162682    11.00000    0.01492    0.01378 = 
         0.01623    0.00276    0.00325    0.00183 
C17   1    0.503957    0.129199    0.236306    11.00000    0.01578    0.02279 = 
         0.02108   -0.00338    0.00456   -0.00269 
AFIX 137 
H17A  2    0.529499    0.150720    0.299790    11.00000   -1.50000 
H17B  2    0.461934    0.087882    0.249280    11.00000   -1.50000 
H17C  2    0.428118    0.153661    0.195557    11.00000   -1.50000 
AFIX   0 
C18   1    0.772426    0.021890   -0.031336    11.00000    0.02807    0.02192 = 
         0.02241   -0.00612    0.00421    0.00061 
AFIX 137 
H18A  2    0.866684    0.025061   -0.065387    11.00000   -1.50000 
H18B  2    0.684479    0.029981   -0.079112    11.00000   -1.50000 
H18C  2    0.764091   -0.020152   -0.003542    11.00000   -1.50000 
AFIX   0 
C19   1    1.064234    0.173880    0.197631    11.00000    0.01351    0.01976 = 
         0.02080   -0.00044    0.00374    0.00011 
AFIX 137 
H19A  2    1.141613    0.164342    0.151237    11.00000   -1.50000 
H19B  2    1.098785    0.158663    0.264404    11.00000   -1.50000 
H19C  2    1.048565    0.219132    0.200002    11.00000   -1.50000 
AFIX   0 
N2    3    0.717820    0.300871    0.335719    11.00000    0.01143    0.01402 = 
         0.01138    0.00024    0.00019    0.00017 
C21   1    0.632154    0.357002    0.304892    11.00000    0.01399    0.01321 = 
         0.01255   -0.00114    0.00042    0.00168 
C22   1    0.473315    0.352612    0.289076    11.00000    0.01415    0.01515 = 
         0.01208   -0.00162    0.00132   -0.00020 
C23   1    0.395746    0.404421    0.248842    11.00000    0.01537    0.01714 = 
         0.01891   -0.00146   -0.00097    0.00111 
AFIX  43 
H23   2    0.288127    0.402192    0.235166    11.00000   -1.20000 
AFIX   0 
C24   1    0.470786    0.459353    0.228023    11.00000    0.02118    0.01446 = 
         0.02063   -0.00090   -0.00088    0.00257 
C25   1    0.628581    0.462542    0.249994    11.00000    0.02166    0.01234 = 
         0.02249   -0.00204    0.00195   -0.00230 
AFIX  43 
H25   2    0.680021    0.500569    0.238570    11.00000   -1.20000 
AFIX   0 
C26   1    0.712418    0.411899    0.287966    11.00000    0.01542    0.01508 = 
         0.01443   -0.00348    0.00185   -0.00177 
C27   1    0.384328    0.295950    0.315920    11.00000    0.01319    0.01844 = 
         0.02141    0.00285    0.00100   -0.00164 
AFIX 137 
H27A  2    0.436796    0.258236    0.295543    11.00000   -1.50000 
H27B  2    0.281804    0.297620    0.281494    11.00000   -1.50000 
H27C  2    0.376372    0.295057    0.388222    11.00000   -1.50000 
AFIX   0 
C28   1    0.382258    0.513952    0.183085    11.00000    0.02870    0.01719 = 
         0.04781    0.00493   -0.00660    0.00301 
AFIX 137 
H28A  2    0.334445    0.536632    0.235721    11.00000   -1.50000 
H28B  2    0.303058    0.498858    0.133415    11.00000   -1.50000 
H28C  2    0.451598    0.541935    0.150843    11.00000   -1.50000 
AFIX   0 
C29   1    0.883110    0.416434    0.309177    11.00000    0.01588    0.01797 = 
         0.02421   -0.00230    0.00255   -0.00324 
AFIX 137 
H29A  2    0.918344    0.457129    0.286884    11.00000   -1.50000 
H29B  2    0.932515    0.383187    0.273385    11.00000   -1.50000 
H29C  2    0.909450    0.411934    0.381052    11.00000   -1.50000 
AFIX   0 
REM  ---------------------------------------------------- 
S1    6    0.477609    0.181942    0.552728    11.00000    0.01435    0.01745 = 
         0.01543   -0.00110    0.00042   -0.00216 
O3    4    0.563597    0.204096    0.472613    11.00000    0.01784    0.02012 = 
         0.01767    0.00270    0.00083   -0.00343 
O4    4    0.567815    0.165820    0.643212    11.00000    0.02505    0.03004 = 
         0.01925    0.00663   -0.00365   -0.00436 
O5    4    0.342007    0.217249    0.567996    11.00000    0.01942    0.04310 = 
         0.02787   -0.00880    0.00190    0.00771 
C7    1    0.400789    0.108210    0.504437    11.00000    0.04794    0.02972 = 
         0.02225   -0.00408    0.01059   -0.01934 
F1    5    0.322877    0.078956    0.571149    11.00000    0.10207    0.06167 = 
         0.03203   -0.00654    0.02232   -0.06222 
F2    5    0.305736    0.118467    0.422598    11.00000    0.04256    0.05767 = 
         0.02492   -0.01402    0.00325   -0.02785 
F3    5    0.509778    0.070355    0.478851    11.00000    0.09059    0.01877 = 
         0.05334   -0.00587    0.01309    0.00477 
  
HKLF 4 
  
REM  X16080 in P2(1)/n 
REM R1 =  0.0419 for    5816 Fo > 4sig(Fo)  and  0.0528 for all    7070 data 
REM    333 parameters refined using      0 restraints 
  
END 
  
WGHT      0.0457      1.2873 
  
REM Highest difference peak  0.670,  deepest hole -0.517,  1-sigma level  0.056 
Q1    1   0.3771  0.0900  0.4372  11.00000  0.05    0.67 
Q2    1   0.4382  0.1462  0.5186  11.00000  0.05    0.49 
Q3    1   0.5946  0.0674  0.5204  11.00000  0.05    0.47 
Q4    1   0.6454  0.1048  0.1375  11.00000  0.05    0.37 
Q5    1   0.4383  0.3233  0.2991  11.00000  0.05    0.37 
Q6    1   0.7216  0.1335  0.2019  11.00000  0.05    0.36 
Q7    1   0.8884  0.2130  0.4240  11.00000  0.05    0.35 
Q8    1   0.7720  0.0499  0.0069  11.00000  0.05    0.34 
Q9    1   0.7626  0.2980  0.3807  11.00000  0.05    0.34 
Q10   1   0.6694  0.3854  0.2940  11.00000  0.05    0.34 
Q11   1   0.5540  0.4583  0.2249  11.00000  0.05    0.34 
Q12   1   0.8395  0.2641  0.4420  11.00000  0.05    0.33 
Q13   1   0.4186  0.0628  0.6034  11.00000  0.05    0.33 
Q14   1   0.7150  0.0749  0.0814  11.00000  0.05    0.31 
Q15   1   0.7983  0.4109  0.3022  11.00000  0.05    0.31 
Q16   1   0.4390  0.3757  0.2679  11.00000  0.05    0.31 
Q17   1   0.8441  0.1476  0.1816  11.00000  0.05    0.31 
Q18   1   0.5558  0.3573  0.2968  11.00000  0.05    0.30 
Q19   1   0.9071  0.1253  0.1183  11.00000  0.05    0.30 
Q20   1   0.8988  0.2295  0.5036  11.00000  0.05    0.30 
; 
_shelx_res_checksum   94004 
  
_shelx_hkl_file 
; 
   1   0   0    0.00    0.02 
   1   0   0    0.13    0.02 
   1   0   0    0.01    0.02 
   1   0   0    0.00    0.02 
  -1   0   0    0.01    0.02 
  -1   0   0    0.02    0.01 
  -1   0   0   -0.01    0.02 
  -1   0   0    0.01    0.02 
   2   0   0    6.64    0.30 
   2   0   0    6.30    0.24 
   2   0   0    6.64    0.32 
   2   0   0    5.95    0.30 
  -2   0   0    5.71    0.29 
  -2   0   0    6.02    0.30 
  -2   0   0    6.39    0.29 
   3   0   0   -0.01    0.06 
   3   0   0    0.08    0.07 
  -3   0   0    0.00    0.05 
  -3   0   0    0.00    0.05 
  -3   0   0   -0.08    0.04 
   3   0   0    0.04    0.07 
   4   0   0    0.06    0.08 
   4   0   0    0.36    0.11 
  -4   0   0    0.25    0.11 
  -4   0   0   -0.03    0.07 
   4   0   0    0.08    0.09 
  -4   0   0    0.07    0.08 
   5   0   0   -0.02    0.09 
  -5   0   0    0.01    0.08 
   5   0   0   -0.02    0.08 
  -5   0   0    0.11    0.11 
   5   0   0   -0.01    0.08 
  -5   0   0   -0.04    0.08 
  -6   0   0   10.04    0.59 
  -6   0   0    9.68    0.55 
   6   0   0   10.56    0.59 
   6   0   0    9.77    0.59 
   6   0   0    9.09    0.61 
  -6   0   0    9.35    0.58 
   7   0   0   -0.08    0.12 
   7   0   0   -0.07    0.09 
   7   0   0    0.01    0.12 
  -7   0   0    0.00    0.12 
  -7   0   0   -0.11    0.11 
   8   0   0   13.82    0.80 
   8   0   0   13.07    0.85 
  -8   0   0   12.12    0.71 
   8   0   0   12.88    0.76 
  -8   0   0   12.92    0.78 
   9   0   0    0.06    0.16 
  -9   0   0    0.00    0.16 
  -9   0   0   -0.03    0.13 
   9   0   0    0.10    0.17 
   9   0   0    0.17    0.17 
 -10   0   0    2.10    0.37 
  10   0   0    2.25    0.47 
  10   0   0    1.86    0.38 
  10   0   0    2.65    0.47 
 -11   0   0    0.05    0.17 
  11   0   0   -0.13    0.19 
  11   0   0   -0.04    0.16 
  11   0   0   -0.07    0.16 
  12   0   0    7.78    0.85 
   0  -1   0   -0.50    0.00 
   0  -1   0   -0.49    0.01 
   0   1   0   -0.50    0.01 
  -1  -1   0    0.10    0.04 
   1  -1   0    0.04    0.02 
   1  -1   0    0.06    0.03 
  -1  -1   0    0.11    0.04 
   1  -1   0    0.02    0.02 
   1  -1   0    0.08    0.03 
   1  -1   0    0.04    0.02 
  -1  -1   0   -0.01    0.02 
  -1   1   0    0.04    0.02 
  -1   1   0    0.01    0.02 
  -1   1   0    0.06    0.02 
   1   1   0    0.06    0.03 
   1   1   0    0.05    0.03 
   1   1   0    0.03    0.03 
   2  -1   0  187.96    5.76 
   2  -1   0  192.76    5.78 
   2  -1   0  194.95    5.72 
  -2  -1   0  194.75    5.67 
   2  -1   0  200.59    5.77 
  -2  -1   0  193.80    5.79 
  -2  -1   0  189.44    5.78 
  -2  -1   0  202.76    5.81 
  -2   1   0  195.09    5.76 
  -2   1   0  196.48    5.74 
   2   1   0  197.27    5.80 
   2   1   0  192.34    5.81 
  -2   1   0  199.56    5.76 
   2   1   0  191.21    5.79 
   3  -1   0   37.51    1.25 
   3  -1   0   36.81    1.17 
  -3  -1   0   36.36    1.27 
   3  -1   0   36.94    1.28 
  -3  -1   0   35.34    1.28 
  -3  -1   0   36.13    1.25 
   3  -1   0   35.89    1.24 
   3   1   0   36.22    1.29 
  -3   1   0   36.69    1.25 
  -3   1   0   34.98    1.23 
   3   1   0   37.25    1.29 
   3   1   0   36.19    1.27 
  -3   1   0   37.61    1.22 
   4  -1   0   16.91    0.64 
  -4  -1   0   16.37    0.75 
   4  -1   0   16.02    0.71 
   4  -1   0   17.60    0.73 
  -4  -1   0   18.32    0.77 
  -4  -1   0   18.65    0.75 
   4  -1   0   17.23    0.76 
   4   1   0   17.29    0.76 
  -4   1   0   16.43    0.69 
   4   1   0   17.32    0.75 
   4   1   0   17.17    0.78 
  -4   1   0   17.10    0.72 
  -4   1   0   17.57    0.73 
  -5  -1   0   18.74    0.86 
   5  -1   0   18.04    0.82 
  -5  -1   0   18.60    0.82 
   5  -1   0   19.32    0.88 
   5  -1   0   18.65    0.82 
  -5  -1   0   19.58    0.87 
  -5   1   0   18.42    0.79 
   5   1   0   19.68    0.91 
  -5   1   0   18.51    0.83 
   5   1   0   18.13    0.85 
  -5   1   0   19.90    0.84 
   5   1   0   19.32    0.85 
   6  -1   0    0.28    0.14 
  -6  -1   0    0.36    0.16 
   6  -1   0    0.78    0.19 
  -6  -1   0    0.63    0.20 
  -6  -1   0    0.25    0.13 
   6  -1   0    0.54    0.18 
   6   1   0    0.27    0.14 
  -6   1   0    0.47    0.14 
  -6   1   0    0.49    0.17 
  -6   1   0    0.49    0.18 
   6   1   0    0.36    0.15 
   6   1   0    0.32    0.15 
   7  -1   0    8.54    0.62 
  -7  -1   0    7.73    0.57 
   7  -1   0    8.55    0.56 
  -7  -1   0    8.82    0.56 
   7  -1   0    9.65    0.60 
  -7   1   0    7.91    0.52 
   7   1   0    9.37    0.60 
   7   1   0    8.82    0.60 
  -7   1   0    7.56    0.55 
   7   1   0    8.56    0.63 
   8  -1   0    1.65    0.36 
  -8  -1   0    1.39    0.29 
  -8  -1   0    1.34    0.30 
   8  -1   0    1.35    0.28 
   8  -1   0    1.77    0.35 
   8   1   0    1.68    0.37 
  -8   1   0    1.47    0.29 
   8   1   0    1.22    0.30 
   8   1   0    0.84    0.25 
  -8   1   0    1.32    0.29 
  -9  -1   0    8.22    0.65 
   9  -1   0    7.32    0.60 
   9  -1   0    6.22    0.62 
   9  -1   0    6.18    0.70 
  -9  -1   0    7.81    0.57 
   9   1   0    7.90    0.83 
   9   1   0    8.56    0.82 
   9   1   0    6.53    0.66 
  -9   1   0    6.50    0.66 
  -9   1   0    6.69    0.52 
 -10  -1   0   12.23    0.78 
  10  -1   0   11.92    0.91 
  10  -1   0   12.34    0.81 
  10  -1   0   13.54    0.87 
 -10  -1   0   11.97    0.86 
  10   1   0   12.30    0.93 
  10   1   0   12.79    0.87 
  10   1   0   13.03    0.84 
 -10   1   0   12.67    0.77 
  11  -1   0    1.83    0.50 
  11  -1   0    1.68    0.39 
  11  -1   0    2.38    0.43 
 -11  -1   0    1.37    0.34 
  11   1   0    1.67    0.38 
 -11   1   0    1.79    0.36 
  11   1   0    2.03    0.42 
  11   1   0    1.92    0.49 
  12  -1   0   19.30    1.18 
  12  -1   0   17.68    1.21 
 -12  -1   0   16.95    1.05 
  12   1   0   19.95    1.17 
  12   1   0   21.80    1.39 
   0  -2   0  328.49   10.03 
   0  -2   0  349.17   10.01 
   0  -2   0  341.52    9.95 
   0  -2   0  295.61   10.05 
   0  -2   0  348.85    9.93 
  -1  -2   0    0.68    0.10 
   1  -2   0    0.83    0.06 
   1  -2   0    0.99    0.07 
  -1  -2   0    0.83    0.10 
   1  -2   0    0.78    0.08 
  -1  -2   0    0.85    0.10 
  -1  -2   0    0.70    0.04 
   1  -2   0    0.76    0.06 
   1  -2   0    0.75    0.06 
   1   2   0    0.86    0.10 
  -1   2   0    0.91    0.06 
   1   2   0    1.09    0.12 
  -1   2   0    0.89    0.05 
   1   2   0    0.71    0.09 
   2  -2   0    7.49    0.32 
  -2  -2   0    6.52    0.34 
  -2  -2   0    6.61    0.33 
   2  -2   0    7.16    0.30 
   2  -2   0    6.44    0.29 
  -2  -2   0    6.35    0.34 
   2  -2   0    7.17    0.30 
   2  -2   0    6.93    0.32 
   2   2   0    7.04    0.35 
  -2   2   0    6.62    0.29 
  -2   2   0    7.12    0.28 
   2   2   0    6.51    0.34 
  -2   2   0    7.23    0.30 
   2   2   0    6.80    0.35 
   3  -2   0  114.28    3.52 
   3  -2   0  112.18    3.47 
  -3  -2   0  114.80    3.55 
  -3  -2   0  115.84    3.55 
   3  -2   0  113.06    3.44 
   3  -2   0  112.46    3.47 
  -3  -2   0  114.14    3.52 
  -3   2   0  110.32    3.46 
  -3   2   0  115.28    3.47 
  -3   2   0  116.99    3.45 
   3   2   0  113.16    3.53 
   3   2   0  113.26    3.55 
   3   2   0  114.14    3.57 
   4  -2   0   10.96    0.55 
   4  -2   0   10.75    0.52 
  -4  -2   0   10.83    0.57 
  -4  -2   0   10.76    0.57 
   4  -2   0   10.27    0.47 
  -4  -2   0   11.28    0.55 
   4  -2   0   10.86    0.51 
  -4   2   0   10.28    0.48 
  -4   2   0   11.77    0.53 
   4   2   0   11.78    0.60 
   4   2   0   11.48    0.58 
  -4   2   0   10.50    0.51 
   4   2   0   11.04    0.56 
  -5  -2   0    0.32    0.14 
   5  -2   0    0.60    0.17 
  -5  -2   0    0.42    0.16 
   5  -2   0    0.49    0.14 
   5  -2   0    0.41    0.13 
  -5  -2   0    0.24    0.12 
   5  -2   0    0.41    0.11 
  -5   2   0    0.79    0.18 
  -5   2   0    0.32    0.11 
   5   2   0    0.29    0.14 
  -5   2   0    0.37    0.13 
   5   2   0    0.31    0.14 
   5   2   0    0.21    0.13 
   6  -2   0    6.72    0.46 
  -6  -2   0    7.73    0.53 
  -6  -2   0    8.38    0.55 
   6  -2   0    8.00    0.50 
   6  -2   0    8.25    0.55 
  -6  -2   0    6.66    0.47 
   6   2   0    7.14    0.50 
   6   2   0    7.39    0.52 
  -6   2   0    6.92    0.43 
  -6   2   0    7.22    0.48 
   6   2   0    7.98    0.57 
   7  -2   0    5.46    0.61 
  -7  -2   0    6.58    0.64 
  -7  -2   0    6.27    0.47 
   7  -2   0    5.18    0.43 
   7  -2   0    5.72    0.45 
   7   2   0    5.63    0.55 
   7   2   0    6.75    0.64 
  -7   2   0    4.89    0.39 
   7   2   0    5.17    0.60 
  -7   2   0    5.99    0.46 
  -8  -2   0    2.63    0.41 
   8  -2   0    2.79    0.43 
  -8  -2   0    3.46    0.44 
   8  -2   0    3.02    0.42 
   8  -2   0    2.46    0.37 
   8   2   0    3.31    0.48 
  -8   2   0    2.99    0.42 
   8   2   0    3.10    0.45 
  -8   2   0    3.30    0.40 
   8   2   0    3.14    0.51 
   9  -2   0    1.40    0.33 
   9  -2   0    1.68    0.34 
  -9  -2   0    1.60    0.37 
  -9  -2   0    1.39    0.32 
   9  -2   0    0.91    0.29 
  -9   2   0    1.67    0.30 
   9   2   0    1.56    0.40 
  -9   2   0    1.09    0.29 
   9   2   0    0.99    0.31 
   9   2   0    1.43    0.32 
 -10  -2   0    0.38    0.21 
  10  -2   0    0.19    0.19 
  10  -2   0    0.23    0.23 
 -10  -2   0    0.23    0.22 
  10  -2   0    0.41    0.22 
  10   2   0    0.40    0.24 
 -10   2   0    0.30    0.19 
  10   2   0    0.03    0.19 
  10   2   0    0.37    0.27 
 -11  -2   0    2.57    0.44 
  11  -2   0    2.22    0.43 
  11  -2   0    2.84    0.50 
  11   2   0    2.15    0.45 
  11   2   0    3.04    0.59 
 -12  -2   0    0.13    0.19 
  12  -2   0    0.07    0.21 
  12   2   0    0.06    0.29 
  12   2   0    0.15    0.23 
   0  -3   0    0.03    0.02 
   0  -3   0    0.02    0.02 
   0  -3   0    0.05    0.03 
   0  -3   0    0.03    0.02 
   0  -3   0    0.03    0.02 
   0   3   0    0.17    0.04 
  -1  -3   0   38.35    1.21 
   1  -3   0   36.15    1.11 
   1  -3   0   36.17    1.12 
   1  -3   0   37.14    1.17 
  -1  -3   0   35.95    1.18 
  -1  -3   0   36.16    1.20 
   1  -3   0   36.15    1.12 
  -1  -3   0   37.75    1.12 
   1  -3   0   37.23    1.11 
  -1   3   0   36.84    1.12 
   1   3   0   37.24    1.21 
   1   3   0   36.57    1.19 
   1   3   0   37.15    1.21 
  -2  -3   0   12.46    0.53 
   2  -3   0   11.92    0.44 
  -2  -3   0   11.60    0.52 
  -2  -3   0   11.79    0.38 
   2  -3   0   11.11    0.47 
   2  -3   0   11.84    0.46 
   2  -3   0   12.07    0.44 
  -2  -3   0   11.31    0.50 
   2   3   0   11.94    0.52 
   2   3   0   12.05    0.53 
  -2   3   0   11.87    0.41 
  -2   3   0   12.17    0.44 
   2   3   0   12.43    0.52 
   3  -3   0   44.60    1.53 
   3  -3   0   47.73    1.55 
  -3  -3   0   47.34    1.61 
  -3  -3   0   45.80    1.63 
   3  -3   0   46.65    1.58 
   3  -3   0   49.18    1.54 
   3  -3   0   49.23    1.60 
  -3   3   0   48.07    1.51 
  -3   3   0   46.33    1.54 
   3   3   0   49.42    1.64 
   3   3   0   48.45    1.67 
   3   3   0   49.03    1.66 
  -3   3   0   48.47    1.55 
  -4  -3   0   13.95    0.67 
   4  -3   0   13.25    0.62 
  -4  -3   0   12.98    0.64 
   4  -3   0   12.60    0.56 
  -4  -3   0   13.11    0.62 
   4  -3   0   12.45    0.56 
   4  -3   0   12.43    0.55 
   4   3   0   11.88    0.65 
  -4   3   0   13.41    0.54 
   4   3   0   11.89    0.61 
  -4   3   0   12.86    0.57 
   4   3   0   11.72    0.63 
  -4   3   0   12.11    0.56 
   5  -3   0   29.54    1.14 
  -5  -3   0   30.90    1.20 
   5  -3   0   30.07    1.20 
   5  -3   0   30.79    1.14 
  -5  -3   0   29.88    1.24 
  -5  -3   0   30.55    1.24 
   5  -3   0   28.42    1.08 
  -5   3   0   30.12    1.09 
   5   3   0   30.10    1.26 
   5   3   0   31.55    1.25 
  -5   3   0   29.06    1.13 
  -5   3   0   28.87    1.13 
   5   3   0   28.88    1.20 
   6  -3   0   17.66    0.82 
  -6  -3   0   16.96    0.84 
   6  -3   0   16.89    0.80 
   6  -3   0   16.50    0.86 
  -6  -3   0   18.72    0.91 
  -6  -3   0   17.30    0.89 
   6   3   0   20.23    0.94 
  -6   3   0   18.55    0.78 
   6   3   0   17.83    0.88 
  -6   3   0   17.79    0.82 
   6   3   0   17.40    0.93 
   7  -3   0    2.01    0.30 
  -7  -3   0    1.46    0.29 
   7  -3   0    1.57    0.31 
   7  -3   0    1.47    0.26 
  -7  -3   0    1.44    0.30 
  -7   3   0    1.69    0.30 
   7   3   0    1.90    0.35 
  -7   3   0    1.79    0.27 
   7   3   0    1.23    0.32 
   7   3   0    2.11    0.35 
   8  -3   0   11.78    0.70 
  -8  -3   0   10.87    0.76 
   8  -3   0   11.61    0.71 
  -8  -3   0   12.37    0.74 
   8  -3   0   12.70    0.80 
  -8   3   0   11.26    0.64 
   8   3   0   11.92    0.78 
   8   3   0   11.70    0.83 
   8   3   0   11.91    0.75 
  -8   3   0   11.18    0.70 
   9  -3   0    0.54    0.26 
   9  -3   0    0.59    0.23 
   9  -3   0    0.90    0.26 
  -9  -3   0    0.93    0.31 
  -9  -3   0    0.57    0.25 
   9   3   0    0.28    0.25 
   9   3   0    0.70    0.30 
  -9   3   0    0.50    0.19 
   9   3   0    0.88    0.28 
  10  -3   0    0.11    0.16 
 -10  -3   0    0.01    0.16 
 -10  -3   0    0.05    0.21 
  10  -3   0    0.47    0.22 
  10   3   0    0.36    0.23 
 -10   3   0    0.14    0.14 
  10   3   0   -0.07    0.20 
  11  -3   0    0.04    0.19 
 -11  -3   0    0.08    0.18 
  11  -3   0    0.06    0.17 
  11   3   0   -0.03    0.18 
  11   3   0   -0.19    0.16 
 -12  -3   0    0.15    0.23 
  12  -3   0    0.02    0.21 
  12   3   0   -0.19    0.20 
  12   3   0    0.23    0.33 
   0  -4   0  149.18    4.60 
   0  -4   0  160.56    4.65 
   0  -4   0  156.33    4.64 
   0  -4   0  158.60    4.64 
   0  -4   0  156.41    4.63 
   0  -4   0  158.45    4.62 
   0   4   0  156.75    4.63 
   0   4   0  159.41    4.67 
  -1  -4   0    3.34    0.21 
  -1  -4   0    3.02    0.21 
   1  -4   0    3.11    0.14 
   1  -4   0    3.01    0.19 
  -1  -4   0    2.80    0.20 
  -1  -4   0    3.05    0.16 
   1  -4   0    3.03    0.13 
  -1  -4   0    3.33    0.19 
   1  -4   0    3.58    0.15 
   1  -4   0    3.16    0.15 
   1   4   0    3.16    0.21 
  -1   4   0    2.94    0.15 
   1   4   0    3.13    0.20 
   1   4   0    3.01    0.21 
   2  -4   0   12.01    0.45 
   2  -4   0   12.37    0.51 
  -2  -4   0   13.33    0.57 
   2  -4   0   12.43    0.45 
  -2  -4   0   12.78    0.42 
  -2  -4   0   12.58    0.56 
  -2  -4   0   11.68    0.52 
   2  -4   0   12.41    0.47 
   2   4   0   12.70    0.55 
  -2   4   0   13.46    0.46 
   2   4   0   11.49    0.55 
   2   4   0   12.91    0.57 
  -2   4   0   12.54    0.42 
  -3  -4   0   73.43    2.17 
   3  -4   0   72.03    2.28 
  -3  -4   0   77.55    2.44 
   3  -4   0   72.53    2.32 
  -3  -4   0   74.13    2.43 
   3  -4   0   72.63    2.33 
   3  -4   0   74.34    2.28 
  -3  -4   0   73.12    2.39 
   3   4   0   73.74    2.41 
  -3   4   0   73.81    2.24 
   3   4   0   73.62    2.43 
   3   4   0   76.40    2.46 
  -3   4   0   72.24    2.28 
  -4  -4   0    2.06    0.27 
   4  -4   0    2.61    0.25 
  -4  -4   0    1.37    0.23 
   4  -4   0    2.43    0.25 
  -4  -4   0    3.09    0.36 
   4  -4   0    2.64    0.29 
   4  -4   0    2.18    0.24 
  -4   4   0    2.69    0.22 
   4   4   0    2.40    0.33 
   4   4   0    2.40    0.30 
  -4   4   0    2.18    0.21 
   4   4   0    2.78    0.33 
  -4   4   0    2.54    0.28 
   5  -4   0   17.35    0.75 
  -5  -4   0   17.73    0.83 
  -5  -4   0   17.01    0.86 
   5  -4   0   17.69    0.76 
  -5  -4   0   18.36    0.88 
   5  -4   0   17.98    0.76 
  -5   4   0   17.54    0.71 
  -5   4   0   18.60    0.77 
   5   4   0   16.37    0.87 
  -5   4   0   17.84    0.76 
   5   4   0   17.68    0.84 
   5   4   0   17.71    0.87 
   6  -4   0    1.81    0.26 
   6  -4   0    1.74    0.29 
   6  -4   0    1.96    0.28 
  -6  -4   0    2.16    0.32 
   6  -4   0    1.63    0.24 
  -6  -4   0    2.01    0.35 
  -6  -4   0    1.63    0.30 
   6   4   0    2.21    0.35 
   6   4   0    1.93    0.35 
   6   4   0    1.45    0.29 
  -6   4   0    2.13    0.26 
  -6   4   0    1.59    0.25 
   7  -4   0    4.17    0.45 
   7  -4   0    5.72    0.42 
  -7  -4   0    5.45    0.56 
  -7  -4   0    4.50    0.53 
  -7  -4   0    4.29    0.54 
   7   4   0    3.85    0.49 
   7   4   0    4.96    0.61 
  -7   4   0    5.67    0.43 
  -7   4   0    5.11    0.37 
   7   4   0    5.19    0.55 
   8  -4   0    1.23    0.26 
  -8  -4   0    1.94    0.36 
  -8  -4   0    1.96    0.38 
   8  -4   0    1.33    0.28 
  -8   4   0    1.38    0.25 
   8   4   0    0.71    0.27 
  -8   4   0    1.20    0.27 
   8   4   0    1.49    0.32 
   8   4   0    2.11    0.41 
   9  -4   0   14.89    0.86 
  -9  -4   0   14.62    0.88 
  -9  -4   0   15.19    0.95 
   9  -4   0   14.57    0.83 
   9   4   0   15.16    0.91 
   9   4   0   14.84    1.01 
  -9   4   0   14.39    0.76 
   9   4   0   14.58    0.93 
 -10  -4   0    1.99    0.44 
  10  -4   0    1.52    0.34 
 -10  -4   0    1.95    0.41 
  10  -4   0    1.73    0.34 
  10   4   0    2.01    0.43 
  10   4   0    2.52    0.50 
 -11  -4   0    0.49    0.26 
 -11  -4   0    0.62    0.31 
  11  -4   0    0.28    0.20 
  11  -4   0    0.04    0.17 
  11   4   0    0.81    0.33 
  11   4   0    1.22    0.44 
 -12  -4   0    0.65    0.29 
  12  -4   0    0.74    0.31 
  -1  -5   0   13.93    0.56 
  -1  -5   0   15.26    0.60 
   1  -5   0   14.89    0.51 
   1  -5   0   15.57    0.54 
   1  -5   0   15.14    0.50 
   1  -5   0   14.69    0.58 
  -1  -5   0   15.71    0.54 
   1  -5   0   14.80    0.49 
  -1  -5   0   15.27    0.61 
  -1  -5   0   14.30    0.60 
   1   5   0   14.71    0.58 
  -1   5   0   15.24    0.52 
   1   5   0   15.30    0.61 
   1   5   0   15.23    0.62 
  -2  -5   0   -0.03    0.04 
  -2  -5   0    0.21    0.05 
   2  -5   0    0.01    0.03 
  -2  -5   0    0.01    0.05 
   2  -5   0    0.00    0.03 
   2  -5   0    0.01    0.03 
  -2  -5   0   -0.07    0.04 
   2  -5   0    0.07    0.06 
  -2   5   0    0.00    0.03 
   2   5   0   -0.01    0.06 
   2   5   0    0.05    0.05 
   2   5   0    0.00    0.06 
   3  -5   0  123.33    3.78 
  -3  -5   0  126.14    3.62 
   3  -5   0  125.39    3.71 
   3  -5   0  119.57    3.74 
  -3  -5   0  122.41    3.88 
  -3  -5   0  118.93    3.82 
   3  -5   0  120.73    3.69 
  -3  -5   0  128.38    3.90 
  -3   5   0  124.13    3.64 
   3   5   0  120.20    3.84 
   3   5   0  123.33    3.90 
   3   5   0  120.61    3.87 
  -3   5   0  124.91    3.71 
   4  -5   0    1.00    0.18 
   4  -5   0    1.03    0.16 
   4  -5   0    0.86    0.15 
  -4  -5   0    0.71    0.17 
   4  -5   0    0.71    0.16 
  -4  -5   0    0.93    0.20 
  -4  -5   0    1.10    0.23 
   4   5   0    1.03    0.21 
   4   5   0    0.90    0.21 
  -4   5   0    1.20    0.18 
   4   5   0    0.85    0.21 
  -4   5   0    0.99    0.13 
  -5  -5   0    0.26    0.14 
   5  -5   0    0.30    0.12 
  -5  -5   0    0.07    0.11 
   5  -5   0    0.10    0.08 
  -5  -5   0    0.21    0.13 
   5  -5   0    0.24    0.13 
   5  -5   0    0.21    0.10 
  -5   5   0    0.16    0.08 
  -5   5   0    0.14    0.10 
   5   5   0    0.07    0.10 
   5   5   0    0.23    0.14 
   5   5   0    0.36    0.16 
  -6  -5   0   11.58    0.69 
   6  -5   0   11.89    0.61 
  -6  -5   0   11.40    0.72 
  -6  -5   0   12.83    0.75 
   6  -5   0   12.86    0.64 
   6  -5   0   12.56    0.63 
   6   5   0   14.30    0.81 
  -6   5   0   12.05    0.57 
   6   5   0   13.17    0.73 
   6   5   0   12.12    0.74 
  -6   5   0   13.64    0.65 
  -7  -5   0    1.51    0.34 
  -7  -5   0    2.19    0.36 
  -7  -5   0    1.24    0.30 
   7  -5   0    1.67    0.27 
   7  -5   0    1.57    0.26 
   7   5   0    1.25    0.33 
   7   5   0    1.15    0.28 
   7   5   0    1.15    0.28 
  -7   5   0    1.53    0.24 
  -7   5   0    1.63    0.27 
   8  -5   0    0.33    0.15 
  -8  -5   0    0.13    0.16 
   8  -5   0    0.00    0.12 
  -8  -5   0    0.05    0.14 
   8   5   0    0.50    0.23 
   8   5   0    0.05    0.14 
   8   5   0    0.05    0.16 
  -8   5   0    0.39    0.15 
  -9  -5   0    3.10    0.53 
   9  -5   0    3.08    0.44 
  -9  -5   0    3.64    0.50 
   9  -5   0    2.32    0.36 
   9   5   0    3.06    0.49 
   9   5   0    1.90    0.45 
 -10  -5   0    6.72    0.73 
  10  -5   0    7.69    0.60 
  10  -5   0    6.00    0.63 
 -10  -5   0    7.65    0.85 
  10   5   0    7.33    0.76 
  10   5   0    7.36    0.89 
 -11  -5   0    0.38    0.26 
  11  -5   0    0.67    0.25 
 -11  -5   0    0.37    0.30 
  11  -5   0    0.36    0.21 
  11   5   0   -0.04    0.25 
  11   5   0    0.93    0.33 
   1  -6   0    0.46    0.07 
  -1  -6   0    0.18    0.09 
   1  -6   0    0.42    0.06 
  -1  -6   0    0.38    0.08 
  -1  -6   0    0.26    0.08 
   1  -6   0    0.30    0.06 
  -1  -6   0    0.31    0.09 
  -1  -6   0    0.26    0.09 
  -1  -6   0    0.36    0.09 
   1  -6   0    0.29    0.08 
  -1   6   0    0.32    0.08 
   1   6   0    0.52    0.11 
  -1   6   0    0.41    0.07 
   1   6   0    0.33    0.10 
   2  -6   0    8.23    0.42 
   2  -6   0    8.10    0.33 
  -2  -6   0    8.81    0.35 
  -2  -6   0    7.98    0.45 
  -2  -6   0    8.72    0.43 
   2  -6   0    9.16    0.34 
   2  -6   0    8.64    0.34 
  -2  -6   0    8.33    0.46 
   2   6   0    8.09    0.43 
   2   6   0    8.02    0.45 
  -2   6   0    8.48    0.34 
   2   6   0    7.66    0.45 
   3  -6   0    1.11    0.18 
   3  -6   0    1.17    0.13 
  -3  -6   0    1.48    0.11 
  -3  -6   0    1.58    0.25 
   3  -6   0    1.42    0.17 
   3  -6   0    1.76    0.17 
  -3  -6   0    1.19    0.20 
  -3  -6   0    1.33    0.23 
  -3   6   0    1.50    0.16 
   3   6   0    1.50    0.22 
   3   6   0    1.34    0.24 
   3   6   0    1.49    0.26 
   4  -6   0   36.01    1.32 
   4  -6   0   35.18    1.24 
  -4  -6   0   36.78    1.43 
  -4  -6   0   35.31    1.41 
   4  -6   0   35.89    1.30 
  -4  -6   0   37.36    1.10 
   4  -6   0   35.70    1.23 
   4   6   0   36.77    1.39 
   4   6   0   35.08    1.44 
  -4   6   0   35.77    1.24 
  -4   6   0   36.56    1.17 
   4   6   0   36.52    1.42 
  -5  -6   0    7.55    0.54 
   5  -6   0    8.14    0.43 
   5  -6   0    7.26    0.46 
   5  -6   0    8.42    0.44 
  -5  -6   0    6.93    0.53 
   5  -6   0    7.77    0.49 
  -5  -6   0    7.75    0.52 
  -5   6   0    8.38    0.44 
   5   6   0    7.85    0.57 
   5   6   0    8.38    0.56 
   5   6   0    8.80    0.55 
  -5   6   0    8.39    0.38 
  -6  -6   0   -0.01    0.10 
  -6  -6   0    0.19    0.14 
   6  -6   0    0.31    0.12 
   6  -6   0    0.15    0.12 
   6  -6   0    0.10    0.09 
  -6  -6   0    0.01    0.10 
  -6   6   0   -0.09    0.07 
   6   6   0    0.08    0.13 
   6   6   0    0.42    0.21 
  -6   6   0    0.28    0.10 
   6   6   0    0.11    0.14 
  -7  -6   0    0.35    0.20 
   7  -6   0    0.04    0.11 
  -7  -6   0   -0.07    0.12 
   7  -6   0   -0.02    0.09 
  -7  -6   0   -0.11    0.14 
   7  -6   0   -0.07    0.09 
  -7   6   0   -0.02    0.10 
   7   6   0    0.12    0.14 
   7   6   0   -0.06    0.13 
  -7   6   0    0.09    0.09 
   7   6   0   -0.25    0.09 
  -8  -6   0    0.50    0.27 
   8  -6   0    0.83    0.22 
  -8  -6   0    0.69    0.25 
   8  -6   0    0.42    0.17 
   8   6   0    0.07    0.14 
  -8   6   0    0.52    0.16 
   8   6   0    1.02    0.36 
   8   6   0    0.50    0.24 
   9  -6   0    4.07    0.48 
   9  -6   0    4.54    0.52 
  -9  -6   0    3.67    0.51 
  -9  -6   0    4.15    0.61 
   9   6   0    4.67    0.58 
   9   6   0    4.59    0.68 
 -10  -6   0    3.40    0.58 
 -10  -6   0    2.06    0.42 
  10  -6   0    2.12    0.38 
  10  -6   0    2.35    0.42 
  10   6   0    2.63    0.53 
  10   6   0    2.87    0.49 
  11  -6   0    0.10    0.20 
  11  -6   0    0.56    0.26 
 -11  -6   0    0.54    0.24 
 -11  -6   0    0.41    0.30 
  11   6   0    0.38    0.25 
  11   6   0    0.68    0.35 
   0  -7   0    0.70    0.11 
   1  -7   0  112.68    3.40 
  -1  -7   0  111.40    3.42 
  -1  -7   0  107.18    3.40 
  -1  -7   0  107.34    3.40 
  -1  -7   0  115.16    3.35 
   1  -7   0  110.21    3.26 
   1  -7   0  109.48    3.26 
  -1  -7   0  105.76    3.34 
   1  -7   0  109.23    3.30 
   1  -7   0  108.24    3.20 
  -1  -7   0  109.68    3.41 
   1   7   0  111.60    3.37 
  -1   7   0  109.35    3.36 
  -1   7   0  108.29    3.29 
   1   7   0  110.06    3.44 
  -2  -7   0   64.08    2.21 
  -2  -7   0   69.19    2.06 
   2  -7   0   65.43    2.16 
   2  -7   0   68.80    2.02 
  -2  -7   0   66.18    2.22 
  -2  -7   0   65.32    2.15 
   2  -7   0   66.44    2.02 
   2  -7   0   65.55    2.03 
  -2   7   0   65.92    2.04 
   2   7   0   67.18    2.21 
   2   7   0   65.50    2.17 
   2   7   0   64.89    2.23 
  -3  -7   0    0.14    0.08 
  -3  -7   0   -0.09    0.08 
   3  -7   0    0.08    0.06 
   3  -7   0    0.05    0.07 
   3  -7   0    0.12    0.05 
   3  -7   0   -0.03    0.03 
  -3  -7   0   -0.01    0.04 
  -3  -7   0    0.02    0.08 
   3   7   0    0.16    0.10 
   3   7   0    0.05    0.08 
   3   7   0   -0.05    0.08 
  -3   7   0    0.00    0.05 
  -4  -7   0   25.28    1.11 
   4  -7   0   25.11    1.02 
  -4  -7   0   24.33    1.05 
   4  -7   0   25.19    0.91 
   4  -7   0   25.13    0.91 
  -4  -7   0   24.95    1.10 
  -4  -7   0   25.81    0.82 
   4  -7   0   24.87    0.97 
   4   7   0   24.67    1.12 
   4   7   0   25.66    1.11 
   4   7   0   25.68    1.08 
  -4   7   0   25.71    0.92 
  -5  -7   0    2.33    0.35 
   5  -7   0    2.04    0.29 
  -5  -7   0    2.85    0.38 
   5  -7   0    2.74    0.28 
   5  -7   0    2.59    0.32 
  -5  -7   0    2.56    0.39 
   5  -7   0    2.77    0.28 
  -5   7   0    2.51    0.26 
  -5   7   0    2.48    0.18 
   5   7   0    2.58    0.38 
   5   7   0    2.28    0.37 
   5   7   0    2.79    0.37 
   6  -7   0   34.71    1.30 
  -6  -7   0   36.26    1.54 
  -6  -7   0   36.71    1.54 
  -6  -7   0   36.09    1.47 
   6  -7   0   35.66    1.32 
   6  -7   0   36.33    1.40 
   6   7   0   33.95    1.46 
  -6   7   0   33.79    1.31 
  -6   7   0   37.49    1.23 
   6   7   0   32.36    1.53 
   6   7   0   35.02    1.52 
  -7  -7   0   11.12    0.77 
   7  -7   0   10.79    0.61 
   7  -7   0   10.75    0.65 
  -7  -7   0   10.77    0.76 
   7  -7   0   11.64    0.62 
  -7  -7   0   12.18    0.74 
  -7   7   0   11.13    0.54 
   7   7   0   12.98    0.81 
   7   7   0   11.23    0.73 
   7   7   0   10.28    0.77 
  -8  -7   0   26.55    1.22 
  -8  -7   0   24.07    1.25 
   8  -7   0   23.42    1.06 
   8  -7   0   21.25    1.02 
   8   7   0   20.84    1.24 
   8   7   0   23.57    1.18 
  -9  -7   0    5.03    0.62 
  -9  -7   0    6.75    0.78 
   9  -7   0    6.77    0.51 
   9  -7   0    6.16    0.61 
   9   7   0    5.81    0.66 
   9   7   0    5.45    0.71 
 -10  -7   0   23.16    1.36 
 -10  -7   0   23.91    1.28 
  10  -7   0   23.67    1.19 
  10  -7   0   25.22    1.19 
  10   7   0   26.52    1.51 
  10   7   0   24.48    1.30 
  11  -7   0    1.05    0.29 
 -11  -7   0    0.54    0.29 
  11  -7   0    1.69    0.37 
 -11  -7   0    1.23    0.40 
  11   7   0    1.72    0.48 
  11   7   0    1.52    0.39 
   0  -8   0   68.59    2.15 
   0  -8   0   67.84    2.12 
   0  -8   0   65.26    2.07 
   0  -8   0   68.49    2.17 
   0  -8   0   67.12    2.12 
   0   8   0   66.59    2.20 
   0   8   0   67.59    2.12 
   0   8   0   67.89    2.11 
   1  -8   0    3.30    0.26 
  -1  -8   0    4.04    0.29 
  -1  -8   0    3.51    0.27 
   1  -8   0    4.01    0.20 
  -1  -8   0    4.40    0.30 
  -1  -8   0    3.59    0.25 
   1  -8   0    3.90    0.15 
   1  -8   0    3.90    0.20 
  -1  -8   0    3.51    0.24 
   1  -8   0    3.58    0.22 
  -1   8   0    4.03    0.22 
   1   8   0    3.73    0.30 
   1   8   0    3.45    0.25 
  -1   8   0    3.73    0.26 
   2  -8   0    6.24    0.27 
  -2  -8   0    6.38    0.32 
  -2  -8   0    6.65    0.38 
  -2  -8   0    5.73    0.40 
   2  -8   0    6.35    0.38 
   2  -8   0    5.89    0.28 
   2  -8   0    6.12    0.28 
  -2  -8   0    6.56    0.42 
  -2   8   0    6.12    0.30 
   2   8   0    6.76    0.39 
   2   8   0    6.23    0.43 
   2   8   0    6.34    0.41 
  -3  -8   0   54.26    2.00 
  -3  -8   0   55.73    2.01 
  -3  -8   0   56.08    1.94 
   3  -8   0   56.05    1.77 
   3  -8   0   58.58    1.81 
   3  -8   0   56.30    1.94 
   3  -8   0   55.71    1.77 
  -3  -8   0   56.88    1.78 
   3   8   0   55.73    1.99 
   3   8   0   54.12    1.95 
  -3   8   0   57.34    1.78 
   3   8   0   58.80    2.05 
   4  -8   0   55.45    1.89 
   4  -8   0   57.61    1.84 
   4  -8   0   55.00    1.98 
  -4  -8   0   55.56    2.08 
   4  -8   0   60.44    1.84 
  -4  -8   0   59.28    2.10 
  -4  -8   0   58.21    2.02 
  -4  -8   0   56.50    1.76 
   4   8   0   57.35    2.12 
   4   8   0   55.28    2.06 
  -4   8   0   56.31    1.83 
   4   8   0   57.12    2.03 
  -5  -8   0    0.10    0.12 
  -5  -8   0    0.06    0.11 
   5  -8   0    0.02    0.07 
   5  -8   0    0.13    0.08 
   5  -8   0    0.03    0.10 
  -5  -8   0    0.01    0.11 
   5  -8   0    0.05    0.09 
  -5   8   0   -0.02    0.07 
   5   8   0   -0.09    0.12 
   5   8   0   -0.13    0.10 
   5   8   0   -0.06    0.09 
   6  -8   0    3.48    0.36 
  -6  -8   0    3.55    0.48 
  -6  -8   0    3.63    0.49 
   6  -8   0    4.01    0.44 
   6  -8   0    3.73    0.30 
   6   8   0    3.46    0.50 
  -6   8   0    3.98    0.32 
   6   8   0    5.07    0.53 
   6   8   0    4.41    0.55 
  -7  -8   0    9.98    0.73 
  -7  -8   0    9.23    0.71 
   7  -8   0    9.70    0.63 
   7  -8   0    8.82    0.53 
  -7  -8   0    8.89    0.64 
   7  -8   0    9.48    0.55 
   7   8   0    9.27    0.73 
   7   8   0   10.05    0.68 
   8  -8   0    0.40    0.17 
   8  -8   0    0.70    0.20 
  -8  -8   0    0.60    0.26 
  -8  -8   0    0.37    0.25 
   8   8   0    0.55    0.23 
   8   8   0    0.13    0.22 
   9  -8   0    1.03    0.26 
  -9  -8   0    0.91    0.29 
  -9  -8   0    1.44    0.39 
   9  -8   0    1.50    0.29 
   9   8   0    1.48    0.36 
   9   8   0    1.39    0.40 
 -10  -8   0    1.59    0.42 
  10  -8   0    0.85    0.25 
  10  -8   0    1.52    0.33 
 -10  -8   0    1.45    0.38 
  10   8   0    0.79    0.36 
  10   8   0    1.42    0.36 
  11  -8   0    0.36    0.23 
 -11  -8   0    0.24    0.24 
  11  -8   0    0.08    0.16 
 -11  -8   0    0.14    0.26 
  11   8   0    0.30    0.33 
  11   8   0   -0.19    0.19 
   0  -9   0    0.09    0.07 
   0  -9   0    0.09    0.07 
   0  -9   0    0.10    0.05 
   0  -9   0    0.02    0.06 
   0  -9   0    0.15    0.08 
   0   9   0    0.06    0.06 
   0   9   0    0.06    0.09 
   1  -9   0    6.48    0.28 
  -1  -9   0    6.31    0.39 
   1  -9   0    6.17    0.38 
  -1  -9   0    5.91    0.34 
  -1  -9   0    6.76    0.40 
   1  -9   0    5.82    0.23 
   1  -9   0    5.79    0.32 
   1  -9   0    6.09    0.29 
  -1  -9   0    6.10    0.38 
  -1  -9   0    5.75    0.33 
  -1   9   0    7.07    0.39 
   1   9   0    6.27    0.36 
   1   9   0    6.77    0.43 
  -1   9   0    6.44    0.31 
   2  -9   0   27.65    0.89 
   2  -9   0   26.14    0.91 
   2  -9   0   25.21    0.89 
  -2  -9   0   26.02    1.02 
  -2  -9   0   27.79    1.10 
   2  -9   0   29.19    1.08 
  -2  -9   0   26.82    0.96 
  -2  -9   0   24.76    1.08 
  -2  -9   0   27.23    1.09 
  -2  -9   0   26.56    1.10 
  -2   9   0   26.04    0.91 
   2   9   0   26.04    1.03 
   2   9   0   28.04    1.13 
   2   9   0   27.24    1.09 
  -3  -9   0   11.45    0.65 
   3  -9   0   11.66    0.48 
   3  -9   0   11.52    0.47 
  -3  -9   0   12.18    0.61 
  -3  -9   0   11.62    0.66 
  -3  -9   0   11.68    0.49 
   3  -9   0   12.93    0.63 
   3  -9   0   10.69    0.48 
   3   9   0   11.56    0.61 
   3   9   0   12.28    0.66 
   3   9   0   12.16    0.68 
  -3   9   0   11.71    0.49 
   4  -9   0   10.47    0.50 
  -4  -9   0    9.94    0.63 
  -4  -9   0   10.43    0.42 
   4  -9   0    9.39    0.56 
  -4  -9   0    9.47    0.57 
   4  -9   0    9.36    0.44 
  -4  -9   0    9.10    0.62 
   4  -9   0    9.63    0.44 
   4   9   0   10.06    0.63 
   4   9   0   10.09    0.60 
  -4   9   0    9.82    0.45 
   4   9   0    9.50    0.64 
   5  -9   0    4.32    0.35 
   5  -9   0    5.10    0.32 
  -5  -9   0    5.05    0.56 
  -5  -9   0    5.02    0.56 
   5  -9   0    5.26    0.50 
  -5  -9   0    4.82    0.50 
   5  -9   0    4.91    0.31 
   5   9   0    4.44    0.53 
   5   9   0    4.48    0.48 
  -5   9   0    4.51    0.30 
   5   9   0    5.47    0.56 
  -6  -9   0    5.71    0.59 
  -6  -9   0    4.38    0.55 
   6  -9   0    4.27    0.48 
  -6  -9   0    5.06    0.58 
   6  -9   0    5.21    0.36 
   6  -9   0    5.62    0.37 
   6   9   0    5.84    0.58 
   6   9   0    5.44    0.63 
  -7  -9   0   -0.05    0.14 
   7  -9   0    0.01    0.10 
   7  -9   0   -0.02    0.13 
   7  -9   0    0.04    0.09 
  -7  -9   0   -0.08    0.15 
  -7  -9   0    0.30    0.20 
   7   9   0    0.15    0.19 
   7   9   0    0.09    0.16 
  -8  -9   0    4.57    0.59 
   8  -9   0    2.14    0.32 
   8  -9   0    3.70    0.49 
  -8  -9   0    3.87    0.57 
   8  -9   0    3.83    0.43 
   8   9   0    3.80    0.54 
   8   9   0    3.04    0.52 
   9  -9   0    9.52    0.62 
   9  -9   0    8.20    0.58 
  -9  -9   0    8.79    0.70 
  -9  -9   0    9.89    0.96 
   9   9   0    8.16    0.94 
   9   9   0   11.15    0.78 
  10  -9   0    6.91    0.57 
 -10  -9   0    6.47    0.75 
 -10  -9   0    6.60    0.81 
  10  -9   0    7.68    0.59 
  10   9   0    6.63    0.87 
  10   9   0    6.91    0.76 
  11  -9   0    3.03    0.46 
 -11  -9   0    3.62    0.67 
  11  -9   0    3.09    0.47 
 -11  -9   0    2.77    0.51 
  11   9   0    3.30    0.55 
  11   9   0    2.94    0.65 
   0 -10   0   38.63    1.33 
   0 -10   0   40.93    1.39 
   0 -10   0   38.98    1.39 
   0 -10   0   39.49    1.35 
   0 -10   0   37.68    1.26 
   0  10   0   38.61    1.43 
   0  10   0   38.29    1.31 
  -1 -10   0    2.48    0.30 
  -1 -10   0    2.23    0.25 
  -1 -10   0    2.56    0.29 
   1 -10   0    2.50    0.18 
  -1 -10   0    2.55    0.29 
   1 -10   0    2.47    0.17 
   1 -10   0    2.97    0.32 
  -1 -10   0    2.34    0.24 
   1 -10   0    2.64    0.21 
   1 -10   0    2.08    0.12 
  -1  10   0    2.33    0.27 
  -1  10   0    2.35    0.22 
   1  10   0    2.96    0.29 
   1  10   0    2.82    0.34 
  -2 -10   0   20.74    0.94 
   2 -10   0   20.96    0.75 
  -2 -10   0   20.81    0.94 
   2 -10   0   21.07    0.75 
  -2 -10   0   21.56    0.96 
  -2 -10   0   22.50    0.89 
  -2 -10   0   22.04    0.96 
  -2 -10   0   21.26    0.83 
   2 -10   0   21.82    0.79 
   2 -10   0   23.04    0.94 
   2  10   0   21.52    0.89 
   2  10   0   20.20    0.97 
  -2  10   0   23.36    0.89 
  -2  10   0   21.87    0.78 
  -3 -10   0   13.67    0.74 
   3 -10   0   13.54    0.53 
  -3 -10   0   13.85    0.57 
   3 -10   0   13.33    0.54 
  -3 -10   0   13.32    0.67 
   3 -10   0   12.77    0.68 
  -3 -10   0   12.92    0.72 
   3 -10   0   13.35    0.53 
   3  10   0   12.06    0.73 
   3  10   0   12.05    0.70 
   3  10   0   13.66    0.69 
  -3  10   0   13.83    0.55 
  -4 -10   0    3.62    0.24 
   4 -10   0    3.90    0.28 
  -4 -10   0    3.71    0.46 
   4 -10   0    3.39    0.39 
   4 -10   0    3.38    0.24 
  -4 -10   0    4.36    0.50 
  -4 -10   0    3.85    0.42 
   4 -10   0    3.78    0.25 
   4  10   0    3.59    0.41 
   4  10   0    4.72    0.52 
  -4  10   0    3.57    0.25 
   4  10   0    4.69    0.52 
   5 -10   0   25.04    0.97 
  -5 -10   0   26.51    1.24 
   5 -10   0   26.38    0.96 
  -5 -10   0   26.69    1.24 
  -5 -10   0   23.88    1.13 
   5 -10   0   26.11    1.15 
   5  10   0   26.17    1.17 
   5  10   0   26.11    1.27 
   5  10   0   24.04    1.30 
  -6 -10   0    0.03    0.12 
  -6 -10   0    0.02    0.16 
   6 -10   0    0.02    0.13 
   6 -10   0    0.17    0.12 
   6 -10   0    0.12    0.10 
  -6 -10   0    0.18    0.18 
   6  10   0    0.22    0.17 
   6  10   0    0.65    0.25 
  -7 -10   0    0.51    0.22 
  -7 -10   0    0.74    0.27 
  -7 -10   0    0.76    0.28 
   7 -10   0    0.53    0.22 
   7 -10   0    0.83    0.19 
   7 -10   0    0.92    0.20 
   7  10   0    0.53    0.23 
   7  10   0    0.81    0.30 
   8 -10   0    1.25    0.25 
   8 -10   0    1.25    0.25 
  -8 -10   0    0.77    0.30 
   8 -10   0    0.77    0.26 
  -8 -10   0    1.38    0.33 
   8  10   0    0.88    0.27 
   8  10   0    1.03    0.31 
  -9 -10   0    2.43    0.45 
   9 -10   0    2.32    0.37 
  -9 -10   0    2.47    0.49 
   9 -10   0    2.21    0.34 
   9  10   0    2.71    0.48 
   9  10   0    2.54    0.52 
  10 -10   0    3.85    0.46 
 -10 -10   0    3.65    0.59 
 -10 -10   0    2.63    0.54 
  10 -10   0    3.65    0.48 
  10  10   0    2.64    0.57 
  10  10   0    5.58    0.71 
 -11 -10   0    2.70    0.53 
  11 -10   0    4.28    0.53 
 -11 -10   0    3.50    0.65 
  11 -10   0    2.93    0.45 
  11  10   0    3.49    0.60 
  11  10   0    4.18    0.75 
   0 -11   0    0.40    0.11 
   0 -11   0    0.32    0.11 
   0 -11   0    0.50    0.12 
   0 -11   0    0.35    0.08 
   0  11   0    0.44    0.15 
   0  11   0    0.47    0.11 
  -1 -11   0   52.49    1.83 
   1 -11   0   52.38    1.59 
   1 -11   0   52.47    1.85 
  -1 -11   0   50.61    1.83 
   1 -11   0   53.28    1.67 
  -1 -11   0   52.36    1.74 
   1 -11   0   53.64    1.71 
  -1 -11   0   53.62    1.86 
  -1 -11   0   53.37    1.80 
   1 -11   0   53.10    1.75 
   1  11   0   50.97    1.89 
   1  11   0   49.66    1.76 
  -1  11   0   53.33    1.70 
  -1  11   0   52.19    1.84 
  -2 -11   0   11.37    0.64 
   2 -11   0   12.21    0.47 
   2 -11   0   10.68    0.61 
   2 -11   0   11.79    0.51 
  -2 -11   0   11.18    0.64 
   2 -11   0   12.24    0.48 
  -2 -11   0   10.99    0.64 
  -2 -11   0   11.79    0.56 
  -2 -11   0   11.10    0.57 
   2  11   0   11.38    0.67 
  -2  11   0   12.40    0.60 
   2  11   0   11.56    0.59 
  -2  11   0   12.55    0.50 
   3 -11   0    9.68    0.42 
   3 -11   0   11.36    0.62 
  -3 -11   0    8.70    0.53 
  -3 -11   0    8.73    0.46 
  -3 -11   0    9.34    0.61 
   3 -11   0    9.53    0.43 
  -3 -11   0   10.24    0.63 
   3 -11   0   10.28    0.45 
   3  11   0    9.73    0.64 
  -3  11   0   10.31    0.45 
   3  11   0   11.63    0.61 
   3  11   0    9.10    0.59 
  -4 -11   0    0.29    0.10 
   4 -11   0    0.22    0.15 
  -4 -11   0    0.58    0.21 
   4 -11   0    0.24    0.09 
   4 -11   0    0.45    0.13 
  -4 -11   0    0.47    0.16 
   4 -11   0    0.39    0.10 
  -4 -11   0    0.42    0.20 
   4  11   0    0.30    0.18 
  -4  11   0    0.41    0.12 
   4  11   0    0.20    0.15 
   4  11   0    0.61    0.21 
  -5 -11   0    0.94    0.24 
  -5 -11   0    0.71    0.25 
   5 -11   0    0.96    0.17 
   5 -11   0    0.97    0.17 
  -5 -11   0    0.99    0.27 
   5 -11   0    1.01    0.25 
   5  11   0    1.03    0.26 
   5  11   0    1.02    0.29 
  -6 -11   0    0.34    0.22 
  -6 -11   0    0.77    0.26 
  -6 -11   0    0.31    0.19 
   6 -11   0    0.78    0.17 
   6 -11   0    0.55    0.15 
   6 -11   0    0.27    0.17 
   6  11   0    0.46    0.25 
   6  11   0    0.36    0.20 
  -7 -11   0    4.78    0.62 
   7 -11   0    4.63    0.56 
   7 -11   0    4.49    0.36 
   7 -11   0    4.39    0.35 
  -7 -11   0    3.44    0.50 
  -7 -11   0    4.90    0.64 
   7  11   0    3.53    0.57 
   7  11   0    4.23    0.54 
  -8 -11   0    0.94    0.36 
   8 -11   0    0.99    0.30 
   8 -11   0    0.68    0.19 
  -8 -11   0    0.85    0.32 
   8 -11   0    0.97    0.23 
  -8 -11   0    0.65    0.26 
   8  11   0    0.42    0.26 
   8  11   0    0.61    0.24 
  -9 -11   0    2.57    0.52 
  -9 -11   0    3.72    0.58 
   9 -11   0    3.25    0.41 
   9 -11   0    2.59    0.39 
   9  11   0    2.69    0.48 
   9  11   0    2.66    0.56 
  10 -11   0    0.42    0.22 
 -10 -11   0    0.35    0.27 
  10 -11   0    0.11    0.15 
 -10 -11   0    0.17    0.24 
  10  11   0    0.04    0.25 
  10  11   0   -0.02    0.21 
  11 -11   0    0.00    0.13 
 -11 -11   0    0.49    0.26 
 -11 -11   0    0.02    0.27 
  11 -11   0    0.05    0.17 
  11  11   0    0.31    0.28 
  11  11   0    0.13    0.29 
   0 -12   0    1.93    0.26 
   0 -12   0    1.68    0.18 
   0 -12   0    1.89    0.23 
   0 -12   0    1.92    0.25 
   0 -12   0    2.45    0.28 
   0  12   0    1.96    0.22 
   0  12   0    1.83    0.28 
   1 -12   0    2.86    0.20 
   1 -12   0    3.22    0.26 
   1 -12   0    2.81    0.15 
  -1 -12   0    3.09    0.33 
  -1 -12   0    3.70    0.38 
  -1 -12   0    3.05    0.29 
  -1 -12   0    3.12    0.37 
   1 -12   0    2.81    0.34 
  -1 -12   0    2.47    0.32 
   1 -12   0    2.99    0.23 
   1  12   0    2.55    0.29 
  -1  12   0    2.68    0.21 
  -1  12   0    3.42    0.38 
   1  12   0    3.35    0.41 
  -1  12   0    3.08    0.22 
   2 -12   0    0.45    0.09 
  -2 -12   0    0.45    0.13 
  -2 -12   0    0.51    0.17 
   2 -12   0    0.63    0.17 
  -2 -12   0    0.61    0.16 
   2 -12   0    0.57    0.13 
  -2 -12   0    0.52    0.20 
  -2 -12   0    0.27    0.14 
   2 -12   0    0.67    0.12 
   2  12   0    0.49    0.18 
   2  12   0    0.48    0.14 
  -2  12   0    0.43    0.14 
  -2  12   0    0.46    0.10 
   3 -12   0    7.36    0.38 
   3 -12   0    7.10    0.36 
   3 -12   0    6.81    0.50 
   3 -12   0    7.96    0.36 
  -3 -12   0    7.26    0.47 
  -3 -12   0    7.42    0.55 
  -3 -12   0    8.11    0.43 
  -3 -12   0    7.42    0.54 
   3  12   0    7.45    0.49 
   3  12   0    7.54    0.57 
  -3  12   0    7.27    0.37 
  -4 -12   0    7.08    0.57 
  -4 -12   0    8.47    0.54 
  -4 -12   0    8.47    0.42 
   4 -12   0    7.07    0.38 
   4 -12   0    6.90    0.52 
   4 -12   0    7.55    0.39 
  -4 -12   0    8.37    0.60 
   4 -12   0    8.33    0.43 
   4  12   0    7.15    0.52 
   4  12   0    7.33    0.60 
   5 -12   0   37.45    1.53 
  -5 -12   0   34.79    1.48 
   5 -12   0   35.15    1.26 
  -5 -12   0   35.21    1.59 
  -5 -12   0   34.98    1.57 
   5 -12   0   36.09    1.28 
   5  12   0   37.00    1.65 
   5  12   0   36.87    1.51 
   6 -12   0    2.59    0.41 
  -6 -12   0    2.56    0.44 
  -6 -12   0    2.67    0.45 
   6 -12   0    2.40    0.28 
   6 -12   0    2.51    0.28 
  -6 -12   0    2.06    0.37 
   6  12   0    2.86    0.49 
   6  12   0    2.39    0.40 
   7 -12   0    4.17    0.55 
   7 -12   0    3.54    0.37 
  -7 -12   0    4.17    0.59 
  -7 -12   0    4.90    0.64 
   7 -12   0    4.68    0.37 
  -7 -12   0    4.35    0.58 
   7  12   0    4.21    0.64 
   7  12   0    4.31    0.57 
   8 -12   0    0.30    0.22 
  -8 -12   0    0.12    0.21 
  -8 -12   0    0.06    0.20 
  -8 -12   0    0.18    0.18 
   8 -12   0    0.10    0.13 
   8  12   0    0.00    0.14 
   8  12   0    0.23    0.24 
   9 -12   0    0.33    0.17 
   9 -12   0    0.62    0.20 
  -9 -12   0    0.57    0.26 
  -9 -12   0    0.14    0.24 
   9  12   0    0.20    0.22 
   9  12   0    0.44    0.29 
  10 -12   0    0.36    0.19 
  10 -12   0    0.16    0.16 
 -10 -12   0    0.34    0.25 
 -10 -12   0    0.34    0.31 
  10  12   0    0.44    0.29 
  10  12   0    0.22    0.27 
  11 -12   0    8.42    0.65 
  11 -12   0    7.00    0.70 
 -11 -12   0    6.30    0.87 
 -11 -12   0    6.08    0.78 
  11  12   0    7.95    0.89 
   0 -13   0    0.51    0.14 
   0 -13   0    0.25    0.08 
   0 -13   0    0.54    0.15 
   0 -13   0    0.17    0.10 
   0 -13   0    0.38    0.11 
   0  13   0    0.37    0.11 
   0  13   0    0.36    0.15 
   1 -13   0    0.01    0.08 
   1 -13   0    0.05    0.07 
   1 -13   0    0.02    0.06 
  -1 -13   0   -0.04    0.07 
  -1 -13   0    0.04    0.09 
  -1 -13   0    0.07    0.09 
  -1 -13   0   -0.01    0.09 
   1 -13   0    0.06    0.05 
  -1 -13   0   -0.02    0.06 
   1 -13   0    0.07    0.08 
  -1  13   0    0.05    0.08 
   1  13   0    0.07    0.09 
  -1  13   0    0.00    0.06 
   1  13   0    0.04    0.10 
   2 -13   0    2.33    0.26 
  -2 -13   0    2.31    0.34 
  -2 -13   0    2.52    0.36 
  -2 -13   0    2.29    0.29 
   2 -13   0    2.62    0.25 
  -2 -13   0    2.60    0.38 
   2 -13   0    2.30    0.34 
   2 -13   0    2.16    0.20 
  -2 -13   0    2.46    0.31 
   2  13   0    2.50    0.30 
   2  13   0    2.52    0.38 
  -2  13   0    2.35    0.31 
  -2  13   0    2.53    0.23 
   3 -13   0    3.16    0.26 
  -3 -13   0    4.02    0.31 
   3 -13   0    3.53    0.24 
  -3 -13   0    4.14    0.51 
  -3 -13   0    3.94    0.42 
  -3 -13   0    3.87    0.46 
   3 -13   0    3.22    0.41 
   3 -13   0    4.09    0.25 
   3  13   0    4.62    0.46 
  -3  13   0    3.78    0.40 
   3  13   0    4.45    0.53 
   4 -13   0    5.09    0.31 
  -4 -13   0    4.43    0.48 
   4 -13   0    3.82    0.29 
   4 -13   0    4.89    0.52 
  -4 -13   0    3.66    0.47 
   4 -13   0    4.14    0.27 
  -4 -13   0    3.84    0.30 
  -4 -13   0    3.70    0.49 
   4  13   0    4.15    0.54 
  -5 -13   0    1.36    0.32 
   5 -13   0    1.76    0.35 
  -5 -13   0    1.53    0.36 
   5 -13   0    1.14    0.18 
   5 -13   0    1.29    0.20 
  -5 -13   0    1.37    0.30 
   5  13   0    1.10    0.27 
   5  13   0    1.49    0.34 
   6 -13   0    0.02    0.08 
  -6 -13   0    0.07    0.17 
  -6 -13   0    0.00    0.14 
   6 -13   0   -0.09    0.11 
  -6 -13   0   -0.02    0.18 
   6 -13   0   -0.05    0.07 
   6  13   0   -0.12    0.12 
   6  13   0    0.21    0.20 
  -7 -13   0    3.29    0.50 
   7 -13   0    2.17    0.42 
  -7 -13   0    3.12    0.55 
   7 -13   0    2.26    0.30 
  -7 -13   0    1.97    0.43 
   7 -13   0    2.83    0.33 
   7  13   0    2.39    0.50 
   7  13   0    2.15    0.40 
  -8 -13   0    4.48    0.67 
  -8 -13   0    5.18    0.62 
   8 -13   0    4.81    0.48 
   8 -13   0    4.28    0.45 
  -8 -13   0    5.31    0.69 
   8 -13   0    6.04    0.69 
   8  13   0    6.56    0.71 
   8  13   0    4.22    0.69 
   9 -13   0    2.28    0.35 
   9 -13   0    2.34    0.35 
  -9 -13   0    2.20    0.46 
  -9 -13   0    2.32    0.51 
   9  13   0    2.52    0.55 
   9  13   0    3.37    0.55 
 -10 -13   0    0.23    0.28 
  10 -13   0    0.44    0.22 
 -10 -13   0    0.29    0.28 
  10 -13   0    0.67    0.24 
  10  13   0    0.29    0.32 
  10  13   0    0.97    0.35 
   0 -14   0    2.70    0.33 
   0 -14   0    3.51    0.36 
   0 -14   0    3.23    0.32 
   0 -14   0    3.25    0.37 
   0 -14   0    2.77    0.21 
   0  14   0    2.59    0.28 
   0  14   0    2.71    0.39 
   1 -14   0    4.61    0.35 
  -1 -14   0    5.39    0.40 
  -1 -14   0    5.08    0.39 
   1 -14   0    5.16    0.35 
   1 -14   0    4.02    0.43 
  -1 -14   0    4.92    0.33 
   1 -14   0    5.17    0.23 
  -1 -14   0    5.17    0.42 
  -1 -14   0    4.99    0.50 
   1 -14   0    5.29    0.30 
   1  14   0    5.95    0.60 
   1  14   0    4.71    0.35 
  -1  14   0    4.74    0.48 
  -1  14   0    5.18    0.33 
  -2 -14   0    7.68    0.56 
  -2 -14   0    7.61    0.54 
   2 -14   0    7.41    0.36 
   2 -14   0    8.34    0.56 
   2 -14   0    7.95    0.40 
   2 -14   0    6.26    0.41 
  -2 -14   0    7.29    0.47 
  -2 -14   0    6.91    0.44 
  -2 -14   0    7.24    0.53 
   2  14   0    8.25    0.49 
   2  14   0    7.37    0.57 
  -2  14   0    8.04    0.52 
  -3 -14   0   -0.15    0.09 
   3 -14   0    0.01    0.11 
  -3 -14   0   -0.08    0.11 
   3 -14   0   -0.03    0.06 
  -3 -14   0    0.00    0.09 
  -3 -14   0    0.07    0.11 
   3 -14   0    0.00    0.07 
   3 -14   0    0.09    0.07 
   3  14   0    0.14    0.13 
  -3  14   0    0.01    0.10 
   3  14   0    0.07    0.14 
  -4 -14   0    4.45    0.54 
  -4 -14   0    5.51    0.60 
  -4 -14   0    4.91    0.52 
   4 -14   0    4.70    0.30 
   4 -14   0    5.01    0.54 
  -4 -14   0    5.30    0.36 
   4 -14   0    5.21    0.33 
   4 -14   0    4.99    0.33 
   4  14   0    4.73    0.53 
   4  14   0    4.67    0.61 
   5 -14   0    7.18    0.70 
  -5 -14   0    5.51    0.58 
   5 -14   0    6.12    0.37 
  -5 -14   0    7.62    0.78 
  -5 -14   0    6.22    0.70 
   5 -14   0    6.43    0.38 
   5  14   0    5.84    0.70 
   5  14   0    5.35    0.57 
  -6 -14   0   -0.04    0.12 
   6 -14   0   -0.07    0.12 
   6 -14   0   -0.02    0.08 
  -6 -14   0   -0.09    0.15 
   6 -14   0    0.01    0.08 
  -6 -14   0   -0.08    0.15 
   6  14   0    0.08    0.16 
   6  14   0    0.06    0.18 
   7 -14   0    1.52    0.26 
  -7 -14   0    1.17    0.35 
   7 -14   0    1.92    0.27 
  -7 -14   0    1.80    0.43 
  -7 -14   0    2.01    0.40 
   7 -14   0    1.42    0.34 
   7  14   0    1.15    0.37 
   7  14   0    2.07    0.42 
   8 -14   0    0.20    0.15 
   8 -14   0    0.11    0.19 
  -8 -14   0   -0.11    0.17 
  -8 -14   0    0.00    0.20 
  -8 -14   0    0.46    0.23 
   8 -14   0    0.20    0.13 
   8  14   0    0.01    0.21 
   8  14   0    0.26    0.21 
   9 -14   0    1.37    0.28 
  -9 -14   0    1.79    0.50 
  -9 -14   0    1.31    0.39 
   9 -14   0    0.86    0.22 
   9  14   0    1.30    0.45 
   9  14   0    1.04    0.34 
  10 -14   0    0.25    0.16 
  10 -14   0    0.30    0.19 
 -10 -14   0   -0.13    0.21 
 -10 -14   0    0.43    0.33 
  10  14   0    0.32    0.27 
  10  14   0    0.43    0.34 
   0 -15   0    0.07    0.10 
   0 -15   0    0.08    0.09 
   0 -15   0    0.00    0.06 
   0 -15   0    0.14    0.11 
   0 -15   0   -0.08    0.09 
   0  15   0   -0.03    0.10 
  -1 -15   0    5.51    0.35 
   1 -15   0    5.88    0.41 
  -1 -15   0    6.41    0.46 
  -1 -15   0    6.30    0.47 
   1 -15   0    6.06    0.47 
   1 -15   0    5.34    0.38 
  -1 -15   0    5.84    0.46 
   1 -15   0    5.57    0.26 
  -1 -15   0    6.42    0.45 
   1 -15   0    5.91    0.33 
   1  15   0    6.98    0.66 
   1  15   0    5.79    0.39 
  -1  15   0    5.62    0.56 
   2 -15   0    0.08    0.08 
  -2 -15   0    0.10    0.13 
   2 -15   0    0.04    0.09 
  -2 -15   0   -0.03    0.07 
  -2 -15   0   -0.10    0.07 
   2 -15   0    0.07    0.13 
  -2 -15   0    0.08    0.12 
   2 -15   0   -0.01    0.05 
  -2  15   0    0.01    0.11 
   2  15   0    0.00    0.10 
   2  15   0   -0.10    0.10 
  -3 -15   0    4.96    0.57 
   3 -15   0    3.88    0.26 
  -3 -15   0    4.14    0.41 
   3 -15   0    3.59    0.27 
   3 -15   0    3.78    0.47 
   3 -15   0    3.98    0.31 
  -3 -15   0    3.24    0.46 
  -3 -15   0    4.81    0.47 
  -3  15   0    4.90    0.50 
   3  15   0    3.66    0.52 
   3  15   0    4.37    0.46 
   4 -15   0    3.93    0.28 
  -4 -15   0    4.27    0.55 
   4 -15   0    4.84    0.56 
   4 -15   0    4.12    0.31 
  -4 -15   0    3.73    0.49 
  -4 -15   0    4.15    0.49 
  -4 -15   0    3.67    0.37 
   4  15   0    2.68    0.46 
  -4  15   0    3.95    0.46 
   4  15   0    4.59    0.50 
   5 -15   0    0.06    0.09 
  -5 -15   0   -0.03    0.17 
  -5 -15   0   -0.06    0.13 
  -5 -15   0    0.07    0.16 
   5 -15   0    0.11    0.15 
   5 -15   0    0.01    0.08 
   5  15   0    0.06    0.16 
   5  15   0    0.11    0.20 
   6 -15   0   -0.06    0.12 
  -6 -15   0   -0.03    0.15 
  -6 -15   0    0.03    0.15 
  -6 -15   0    0.15    0.19 
   6 -15   0    0.09    0.10 
   6 -15   0    0.10    0.10 
   6  15   0   -0.03    0.14 
   6  15   0    0.10    0.20 
   7 -15   0    1.08    0.22 
  -7 -15   0    0.40    0.22 
  -7 -15   0    0.56    0.30 
   7 -15   0    0.81    0.32 
  -7 -15   0    1.01    0.36 
   7 -15   0    0.83    0.20 
   7  15   0    1.05    0.36 
   7  15   0    0.74    0.28 
  -8 -15   0   11.88    0.92 
   8 -15   0   11.26    0.64 
   8 -15   0   10.80    0.63 
  -8 -15   0    7.75    0.82 
  -8 -15   0   12.68    0.96 
   8 -15   0    9.81    0.94 
   8  15   0   10.64    0.79 
   8  15   0   12.36    1.21 
   9 -15   0    0.19    0.16 
   9 -15   0    0.32    0.17 
  -9 -15   0   -0.11    0.22 
  -9 -15   0    0.23    0.26 
   9  15   0    0.35    0.31 
   9  15   0    0.29    0.23 
 -10 -15   0    1.92    0.54 
 -10 -15   0    0.95    0.36 
  10 -15   0    1.80    0.33 
  10 -15   0    1.63    0.33 
  10  15   0    1.79    0.56 
   0 -16   0    0.52    0.17 
   0 -16   0    0.58    0.15 
   0 -16   0    0.38    0.16 
   0 -16   0    0.72    0.13 
   0 -16   0    0.57    0.20 
   0  16   0    0.64    0.21 
   1 -16   0    4.07    0.41 
  -1 -16   0    4.18    0.47 
  -1 -16   0    5.04    0.50 
  -1 -16   0    4.54    0.32 
   1 -16   0    4.17    0.43 
   1 -16   0    4.76    0.29 
  -1 -16   0    4.53    0.50 
   1 -16   0    4.61    0.52 
  -1  16   0    5.58    0.58 
   1  16   0    5.35    0.60 
   2 -16   0    3.92    0.49 
   2 -16   0    4.67    0.34 
  -2 -16   0    5.62    0.43 
   2 -16   0    4.49    0.36 
  -2 -16   0    4.46    0.35 
  -2 -16   0    4.57    0.55 
  -2 -16   0    5.18    0.56 
   2 -16   0    5.06    0.29 
   2  16   0    5.02    0.59 
  -2  16   0    4.39    0.52 
  -3 -16   0   -0.02    0.12 
  -3 -16   0    0.11    0.12 
  -3 -16   0   -0.29    0.07 
   3 -16   0   -0.03    0.07 
   3 -16   0    0.07    0.09 
   3 -16   0   -0.03    0.08 
  -3 -16   0   -0.22    0.11 
   3 -16   0    0.10    0.15 
   3  16   0    0.29    0.19 
  -3  16   0    0.01    0.12 
   4 -16   0    8.48    0.79 
  -4 -16   0    8.40    0.68 
  -4 -16   0    9.34    0.69 
   4 -16   0    8.54    0.44 
  -4 -16   0    6.91    0.48 
   4 -16   0    7.18    0.46 
  -4 -16   0    8.49    0.58 
   4  16   0    8.25    0.59 
  -4  16   0    7.67    0.56 
   4  16   0    8.85    0.87 
  -5 -16   0    7.62    0.78 
  -5 -16   0    6.46    0.76 
  -5 -16   0    6.75    0.55 
   5 -16   0    7.10    0.76 
   5 -16   0    7.35    0.45 
   5 -16   0    8.13    0.44 
   5  16   0    6.77    0.66 
   5  16   0    7.34    0.81 
  -6 -16   0   14.30    0.97 
  -6 -16   0   15.09    1.00 
   6 -16   0   13.14    0.91 
  -6 -16   0   12.72    0.83 
   6 -16   0   14.25    0.67 
   6 -16   0   13.85    0.68 
   6  16   0   13.67    1.01 
   6  16   0   14.92    0.92 
   7 -16   0   -0.10    0.18 
  -7 -16   0    0.12    0.19 
   7 -16   0    0.10    0.12 
  -7 -16   0    0.02    0.21 
  -7 -16   0   -0.01    0.19 
   7 -16   0   -0.10    0.08 
   7  16   0    0.17    0.22 
   8 -16   0    1.56    0.40 
   8 -16   0    2.51    0.35 
  -8 -16   0    2.73    0.50 
  -8 -16   0    1.83    0.46 
   8 -16   0    2.79    0.35 
  -8 -16   0    1.29    0.42 
   8  16   0    2.75    0.58 
   9 -16   0    0.61    0.32 
   9 -16   0    1.10    0.24 
   9 -16   0    0.38    0.18 
  -9 -16   0    0.15    0.27 
  -9 -16   0    0.30    0.25 
   9  16   0    0.73    0.39 
  10 -16   0   -0.01    0.13 
 -10 -16   0    0.12    0.22 
  10 -16   0   -0.17    0.14 
 -10 -16   0    0.36    0.33 
  10  16   0   -0.10    0.30 
   0 -17   0    0.04    0.13 
   0 -17   0   -0.01    0.12 
   0 -17   0    0.02    0.11 
   0 -17   0    0.06    0.08 
   0  17   0    0.12    0.17 
  -1 -17   0   32.81    1.37 
   1 -17   0   32.20    1.13 
   1 -17   0   30.99    1.25 
   1 -17   0   30.18    1.38 
  -1 -17   0   30.16    1.35 
  -1 -17   0   33.01    1.18 
  -1 -17   0   31.30    1.33 
   1 -17   0   30.20    1.26 
   1  17   0   30.80    1.44 
  -1  17   0   30.36    1.39 
  -2 -17   0    0.03    0.11 
   2 -17   0   -0.04    0.09 
  -2 -17   0   -0.07    0.09 
  -2 -17   0    0.10    0.16 
   2 -17   0   -0.05    0.06 
  -2 -17   0    0.26    0.17 
   2 -17   0    0.00    0.09 
   2 -17   0    0.13    0.15 
   2  17   0   -0.06    0.15 
  -2  17   0   -0.02    0.12 
  -3 -17   0    2.49    0.43 
   3 -17   0    3.46    0.50 
   3 -17   0    3.65    0.38 
  -3 -17   0    4.04    0.43 
   3 -17   0    3.61    0.35 
   3 -17   0    3.39    0.28 
  -3 -17   0    2.78    0.43 
  -3 -17   0    4.51    0.47 
  -3  17   0    3.49    0.47 
   3  17   0    3.27    0.52 
  -4 -17   0    0.89    0.30 
   4 -17   0    0.26    0.22 
  -4 -17   0    0.35    0.18 
  -4 -17   0    0.34    0.22 
   4 -17   0    0.26    0.14 
   4 -17   0    0.13    0.11 
  -4 -17   0    0.51    0.18 
   4  17   0    0.25    0.21 
  -4  17   0    0.57    0.22 
  -5 -17   0    8.25    0.86 
   5 -17   0    9.36    0.54 
   5 -17   0   10.20    0.52 
  -5 -17   0    9.00    0.65 
  -5 -17   0   10.53    0.78 
   5 -17   0    9.53    0.75 
   5  17   0    9.92    0.98 
  -5  17   0    8.83    0.65 
  -6 -17   0    0.02    0.18 
   6 -17   0    0.39    0.15 
   6 -17   0    0.21    0.22 
  -6 -17   0    0.36    0.23 
  -6 -17   0    0.26    0.24 
   6 -17   0    0.35    0.14 
   6  17   0    0.40    0.29 
  -7 -17   0    0.73    0.33 
  -7 -17   0    0.11    0.22 
  -7 -17   0    0.62    0.26 
   7 -17   0    0.80    0.31 
   7 -17   0    0.35    0.16 
   7 -17   0    0.67    0.19 
   7  17   0    0.54    0.32 
  -8 -17   0    0.84    0.32 
   8 -17   0    1.57    0.28 
  -8 -17   0    1.42    0.44 
   8 -17   0    1.60    0.45 
   8 -17   0    1.00    0.22 
  -8 -17   0    1.37    0.41 
   8  17   0    1.10    0.42 
   9 -17   0    6.16    0.51 
  -9 -17   0    8.26    1.00 
   9 -17   0    7.70    0.56 
   9 -17   0    6.75    0.84 
  -9 -17   0    7.40    0.85 
   9  17   0    7.88    1.01 
   0 -18   0   26.40    1.27 
   0 -18   0   28.05    1.24 
   0 -18   0   28.62    1.24 
   0  18   0   29.29    1.36 
  -1 -18   0    0.06    0.14 
   1 -18   0    0.16    0.15 
   1 -18   0    0.12    0.14 
  -1 -18   0    0.09    0.11 
  -1 -18   0    0.55    0.23 
  -1 -18   0    0.28    0.16 
   1 -18   0    0.56    0.23 
  -1  18   0    0.35    0.19 
   1  18   0    0.32    0.22 
   2 -18   0    2.93    0.36 
  -2 -18   0    3.10    0.37 
  -2 -18   0    2.46    0.41 
   2 -18   0    2.36    0.33 
  -2 -18   0    3.71    0.46 
  -2 -18   0    2.27    0.41 
   2 -18   0    2.40    0.41 
   2  18   0    2.46    0.45 
  -2  18   0    2.26    0.40 
  -3 -18   0    7.58    0.53 
  -3 -18   0    7.21    0.51 
  -3 -18   0    7.94    0.79 
  -3 -18   0    7.47    0.74 
   3 -18   0    6.72    0.44 
   3 -18   0    6.08    0.45 
   3 -18   0    7.67    0.73 
  -3  18   0    7.70    0.60 
   3  18   0    7.61    0.82 
   4 -18   0    0.09    0.12 
  -4 -18   0    0.19    0.17 
   4 -18   0    0.07    0.11 
   4 -18   0    0.13    0.17 
  -4 -18   0    0.09    0.16 
  -4 -18   0    0.14    0.18 
   4  18   0    0.06    0.19 
  -4  18   0    0.14    0.17 
  -5 -18   0   12.49    0.93 
   5 -18   0   12.37    0.89 
   5 -18   0   13.11    0.68 
   5 -18   0   13.27    0.64 
  -5 -18   0   13.13    0.91 
  -5 -18   0   13.57    0.81 
  -5  18   0   12.94    0.82 
   5  18   0   12.85    0.96 
   6 -18   0    0.64    0.17 
   6 -18   0    0.55    0.27 
  -6 -18   0    0.69    0.26 
   6 -18   0    0.35    0.15 
  -6 -18   0    0.15    0.24 
  -6 -18   0    0.56    0.26 
   6  18   0    0.66    0.35 
  -6  18   0    0.28    0.23 
   7 -18   0    3.70    0.41 
  -7 -18   0    3.58    0.54 
  -7 -18   0    4.73    0.73 
   7 -18   0    3.40    0.58 
  -7 -18   0    4.08    0.66 
   7 -18   0    3.95    0.42 
   7  18   0    3.38    0.63 
   8 -18   0    3.91    0.45 
   8 -18   0    3.94    0.65 
   8 -18   0    4.57    0.48 
  -8 -18   0    4.04    0.69 
  -8 -18   0    4.39    0.71 
  -8 -18   0    3.93    0.60 
   8  18   0    3.32    0.65 
  -9 -18   0    0.17    0.22 
  -9 -18   0    0.22    0.27 
   9 -18   0    0.06    0.27 
   9 -18   0    0.04    0.16 
   9 -18   0    0.12    0.15 
   9  18   0    0.10    0.30 
   0 -19   0    0.06    0.13 
   0 -19   0   -0.02    0.12 
   0 -19   0    0.30    0.18 
   0  19   0   -0.08    0.14 
   1 -19   0    8.62    0.57 
  -1 -19   0    8.90    0.64 
   1 -19   0    8.25    0.65 
  -1 -19   0    7.76    0.59 
   1 -19   0    9.08    0.59 
  -1 -19   0    9.03    0.52 
  -1 -19   0    9.25    0.66 
   1  19   0    8.65    0.70 
  -1  19   0    8.25    0.80 
  -2 -19   0    1.77    0.28 
   2 -19   0    1.03    0.24 
  -2 -19   0    1.35    0.31 
  -2 -19   0    1.50    0.31 
  -2 -19   0    2.19    0.43 
   2 -19   0    0.87    0.27 
   2 -19   0    1.18    0.26 
  -2  19   0    1.51    0.35 
   2  19   0    1.79    0.40 
   3 -19   0   13.69    0.70 
  -3 -19   0   12.79    0.89 
   3 -19   0   14.52    0.92 
  -3 -19   0   13.36    0.78 
  -3 -19   0   13.64    0.87 
   3 -19   0   13.75    0.72 
  -3 -19   0   14.79    0.76 
   3  19   0   13.62    0.96 
  -3  19   0   13.95    0.86 
  -4 -19   0   14.34    0.92 
  -4 -19   0   12.92    0.76 
  -4 -19   0   14.69    0.96 
   4 -19   0   12.43    0.69 
   4 -19   0   13.39    0.90 
   4 -19   0   13.56    0.67 
   4  19   0   12.19    0.92 
  -4  19   0   13.00    0.84 
  -5 -19   0   10.38    1.03 
   5 -19   0    8.26    0.53 
   5 -19   0    8.15    0.87 
  -5 -19   0    7.99    0.62 
   5 -19   0    8.98    0.52 
  -5 -19   0    7.48    0.81 
  -5  19   0    7.95    0.65 
   5  19   0    7.47    0.89 
  -6 -19   0    0.41    0.22 
  -6 -19   0    0.23    0.24 
   6 -19   0    0.12    0.13 
  -6 -19   0    0.02    0.19 
   6 -19   0    0.00    0.12 
   6 -19   0    0.10    0.21 
  -6  19   0    0.17    0.20 
   6  19   0    0.42    0.27 
   7 -19   0    6.42    0.47 
   7 -19   0    6.33    0.82 
  -7 -19   0    6.37    0.79 
  -7 -19   0    6.82    0.76 
  -7 -19   0    6.68    0.87 
   7 -19   0    6.52    0.48 
  -7  19   0    5.17    0.63 
   7  19   0    5.98    0.85 
   8 -19   0    0.36    0.17 
   8 -19   0    0.20    0.16 
   8 -19   0    0.45    0.29 
  -8 -19   0   -0.12    0.19 
  -8 -19   0   -0.03    0.23 
  -8 -19   0    0.31    0.27 
   8  19   0   -0.11    0.20 
  -9 -19   0    0.17    0.27 
   9 -19   0    0.38    0.33 
  -9 -19   0   -0.30    0.23 
   9 -19   0    0.28    0.19 
   9 -19   0   -0.11    0.15 
   9  19   0    0.30    0.34 
   0 -20   0    1.94    0.34 
   0 -20   0    2.87    0.45 
   0 -20   0    3.18    0.46 
   0  20   0    3.52    0.55 
   1 -20   0   -0.06    0.13 
  -1 -20   0   -0.06    0.12 
  -1 -20   0    0.01    0.15 
  -1 -20   0    0.00    0.14 
   1 -20   0    0.07    0.14 
   1 -20   0    0.07    0.13 
  -1  20   0    0.43    0.23 
   1  20   0    0.22    0.20 
   2 -20   0    4.27    0.58 
  -2 -20   0    4.88    0.39 
   2 -20   0    5.06    0.50 
   2 -20   0    5.59    0.55 
  -2 -20   0    5.24    0.57 
  -2 -20   0    5.78    0.64 
  -2 -20   0    5.59    0.64 
  -2  20   0    5.23    0.65 
   2  20   0    5.53    0.73 
  -3 -20   0    1.03    0.27 
  -3 -20   0    1.17    0.35 
   3 -20   0    0.94    0.23 
  -3 -20   0    1.17    0.26 
  -3 -20   0    1.45    0.35 
   3 -20   0    0.98    0.24 
   3 -20   0    0.56    0.25 
   3  20   0    0.60    0.28 
  -3  20   0    0.64    0.28 
  -4 -20   0    0.25    0.16 
   4 -20   0    0.74    0.30 
   4 -20   0    0.22    0.16 
  -4 -20   0    0.22    0.23 
  -4 -20   0    0.45    0.26 
   4 -20   0    0.08    0.14 
  -4  20   0   -0.04    0.16 
   4  20   0    0.27    0.22 
  -5 -20   0    3.98    0.51 
   5 -20   0    3.26    0.41 
   5 -20   0    3.24    0.56 
  -5 -20   0    2.36    0.52 
  -5 -20   0    2.76    0.50 
   5 -20   0    3.81    0.41 
  -5  20   0    3.16    0.52 
   5  20   0    2.32    0.51 
  -6 -20   0   13.32    1.00 
  -6 -20   0   13.39    0.98 
   6 -20   0   12.26    0.70 
  -6 -20   0   12.26    0.82 
   6 -20   0   12.38    0.67 
   6 -20   0    9.95    1.01 
  -6  20   0   12.49    0.87 
   6  20   0   12.13    1.01 
   7 -20   0    1.04    0.38 
  -7 -20   0    0.94    0.36 
  -7 -20   0    0.93    0.39 
   7 -20   0    1.16    0.27 
  -7 -20   0    1.49    0.38 
   7 -20   0    0.27    0.17 
   7  20   0    1.24    0.45 
  -7  20   0    0.92    0.33 
  -8 -20   0    1.16    0.42 
  -8 -20   0    1.10    0.42 
   8 -20   0    0.97    0.25 
  -8 -20   0    1.14    0.38 
   8 -20   0    1.24    0.27 
   8 -20   0    0.65    0.37 
   8  20   0    0.43    0.31 
  -9 -20   0    0.14    0.26 
   9 -20   0    0.41    0.34 
   9 -20   0    0.04    0.16 
   0 -21   0    0.05    0.15 
   0 -21   0   -0.04    0.13 
   0 -21   0    0.05    0.17 
   0  21   0    0.11    0.19 
  -1 -21   0   17.90    1.01 
  -1 -21   0   17.37    1.00 
  -1 -21   0   16.59    0.95 
   1 -21   0   17.88    1.06 
   1 -21   0   18.48    0.95 
   1 -21   0   17.40    0.91 
   1  21   0   20.19    1.16 
  -1  21   0   19.22    1.11 
   2 -21   0    0.05    0.15 
   2 -21   0    0.02    0.12 
  -2 -21   0    0.12    0.16 
   2 -21   0    0.03    0.17 
  -2 -21   0    0.11    0.18 
  -2 -21   0   -0.07    0.12 
  -2  21   0    0.03    0.18 
   2  21   0    0.29    0.26 
  -3 -21   0    7.89    0.79 
  -3 -21   0    9.79    0.61 
   3 -21   0    8.52    0.86 
  -3 -21   0    9.09    0.90 
   3 -21   0   10.11    0.62 
  -3 -21   0   10.22    0.70 
   3 -21   0    9.68    0.60 
  -3  21   0   10.55    0.78 
   3  21   0   10.24    1.04 
   4 -21   0    3.77    0.58 
  -4 -21   0    3.92    0.64 
   4 -21   0    2.50    0.35 
   4 -21   0    3.65    0.42 
  -4 -21   0    2.93    0.51 
  -4 -21   0    2.71    0.41 
   4  21   0    2.31    0.48 
  -4  21   0    4.09    0.59 
  -5 -21   0    0.11    0.21 
  -5 -21   0   -0.16    0.16 
   5 -21   0    0.09    0.15 
  -5 -21   0    0.10    0.22 
   5 -21   0    0.28    0.25 
   5 -21   0    0.00    0.14 
  -5  21   0   -0.03    0.19 
   5  21   0    0.00    0.24 
  -6 -21   0    0.34    0.28 
   6 -21   0    0.13    0.16 
  -6 -21   0    0.30    0.20 
   6 -21   0    0.33    0.27 
   6 -21   0    0.15    0.16 
  -6 -21   0    0.26    0.24 
  -6  21   0    0.09    0.23 
   6  21   0    0.46    0.32 
   7 -21   0    0.29    0.20 
   7 -21   0    0.19    0.23 
  -7 -21   0    0.40    0.30 
  -7 -21   0    0.11    0.23 
  -7 -21   0    0.31    0.28 
  -7  21   0    0.09    0.26 
   7  21   0   -0.12    0.23 
  -8 -21   0    4.99    0.69 
  -8 -21   0    2.45    0.55 
  -8 -21   0    2.58    0.60 
   8 -21   0    3.54    0.45 
   8 -21   0    3.16    0.62 
   8  21   0    2.82    0.66 
   0 -22   0    0.02    0.17 
   0 -22   0    0.07    0.16 
   0 -22   0    0.00    0.13 
   0  22   0    0.15    0.21 
   1 -22   0    1.47    0.38 
   1 -22   0    2.08    0.35 
   1 -22   0    2.91    0.45 
  -1 -22   0    1.78    0.34 
  -1 -22   0    2.69    0.46 
  -1 -22   0    2.64    0.45 
   1  22   0    2.89    0.55 
  -1  22   0    2.42    0.48 
   2 -22   0   27.23    1.41 
   2 -22   0   25.57    1.20 
  -2 -22   0   24.64    1.28 
   2 -22   0   26.21    1.16 
  -2 -22   0   27.04    1.31 
  -2 -22   0   27.09    1.38 
   2  22   0   27.18    1.48 
  -2  22   0   26.85    1.39 
  -3 -22   0    0.28    0.21 
   3 -22   0    0.05    0.14 
  -3 -22   0    0.10    0.19 
  -3 -22   0   -0.05    0.16 
  -3 -22   0    0.06    0.19 
   3 -22   0   -0.20    0.15 
   3 -22   0   -0.07    0.15 
  -3  22   0    0.37    0.23 
   3  22   0    0.53    0.32 
   4 -22   0    2.04    0.34 
   4 -22   0    1.56    0.29 
  -4 -22   0    1.74    0.42 
  -4 -22   0    1.77    0.35 
  -4 -22   0    1.10    0.35 
   4 -22   0    1.44    0.39 
  -4  22   0    1.30    0.38 
   4  22   0    1.20    0.42 
   5 -22   0    1.10    0.39 
   5 -22   0    1.32    0.29 
  -5 -22   0    1.66    0.44 
  -5 -22   0    1.55    0.34 
  -5 -22   0    1.75    0.47 
   5  22   0    2.07    0.54 
  -5  22   0    1.20    0.39 
   6 -22   0    6.11    0.49 
  -6 -22   0    5.41    0.66 
   6 -22   0    4.75    0.73 
  -6 -22   0    5.25    0.74 
  -6 -22   0    5.74    0.80 
   6  22   0    4.76    0.78 
  -6  22   0    6.58    0.78 
   7 -22   0   -0.25    0.21 
  -7 -22   0    0.10    0.25 
  -7 -22   0    0.03    0.22 
   7 -22   0    0.16    0.17 
  -7 -22   0    0.03    0.25 
   7  22   0   -0.13    0.28 
   8 -22   0    1.03    0.29 
  -8 -22   0    1.58    0.44 
   8 -22   0    0.81    0.38 
  -8 -22   0    0.90    0.46 
  -8 -22   0    1.42    0.43 
   8  22   0    0.90    0.42 
   0 -23   0    0.07    0.20 
   0 -23   0    0.10    0.15 
   0  23   0    0.37    0.25 
   1 -23   0    0.39    0.22 
   1 -23   0    0.28    0.25 
  -1 -23   0    0.72    0.27 
  -1 -23   0    0.51    0.23 
   1 -23   0    0.66    0.22 
  -1 -23   0    0.33    0.23 
  -1  23   0    0.44    0.27 
   1  23   0    0.71    0.33 
   2 -23   0    4.28    0.63 
   2 -23   0    5.69    0.60 
  -2 -23   0    5.07    0.68 
   2 -23   0    4.73    0.50 
  -2 -23   0    4.77    0.62 
  -2 -23   0    5.26    0.64 
  -2  23   0    5.01    0.69 
   2  23   0    5.48    0.74 
   3 -23   0    2.01    0.46 
  -3 -23   0    1.85    0.40 
   3 -23   0    2.69    0.38 
  -3 -23   0    1.94    0.47 
   3 -23   0    3.14    0.44 
  -3 -23   0    3.11    0.50 
  -3  23   0    2.21    0.49 
   3  23   0    2.14    0.51 
  -4 -23   0   12.09    0.96 
   4 -23   0   10.51    1.07 
  -4 -23   0   13.36    0.79 
  -4 -23   0   12.74    0.92 
   4 -23   0   12.65    0.71 
  -4  23   0   14.09    0.98 
   4  23   0   13.90    1.06 
  -5 -23   0    8.00    0.63 
  -5 -23   0    6.44    0.80 
   5 -23   0    8.09    0.55 
   5 -23   0    7.53    0.90 
  -5 -23   0    6.37    0.87 
  -5  23   0    7.72    0.87 
   5  23   0    6.73    0.94 
  -6 -23   0    0.29    0.25 
   6 -23   0    0.23    0.27 
   6 -23   0    0.17    0.18 
  -6 -23   0    0.53    0.33 
  -6 -23   0    0.29    0.21 
   6  23   0    0.08    0.29 
   7 -23   0    0.13    0.17 
   7 -23   0   -0.15    0.26 
  -7 -23   0   -0.09    0.20 
  -7 -23   0    0.01    0.22 
  -7 -23   0    0.15    0.31 
   7  23   0    0.09    0.28 
   0 -24   0    1.67    0.40 
   0 -24   0    1.01    0.32 
   0 -24   0    1.98    0.35 
   0  24   0    1.18    0.37 
  -1 -24   0    0.94    0.32 
  -1 -24   0    1.33    0.36 
   1 -24   0    1.25    0.37 
   1 -24   0    1.11    0.27 
   1 -24   0    0.99    0.31 
  -1 -24   0    0.74    0.27 
  -1  24   0    0.72    0.31 
   1  24   0    0.58    0.32 
   2 -24   0    8.63    0.65 
   2 -24   0    8.57    0.58 
  -2 -24   0    8.28    0.68 
  -2 -24   0    8.77    0.92 
  -2 -24   0    8.35    0.84 
   2 -24   0    7.27    0.86 
   2  24   0    6.47    0.88 
  -2  24   0    7.38    0.88 
  -3 -24   0    0.08    0.18 
   3 -24   0    0.05    0.15 
  -3 -24   0   -0.10    0.20 
   3 -24   0    0.00    0.18 
  -3  24   0    0.06    0.25 
   3  24   0    0.04    0.26 
  -4 -24   0    0.80    0.33 
  -4 -24   0    0.31    0.24 
   4 -24   0    0.25    0.26 
   4 -24   0    0.41    0.19 
  -4  24   0    0.14    0.25 
   4  24   0    0.25    0.25 
  -5 -24   0    2.91    0.55 
  -5 -24   0    2.57    0.44 
  -5 -24   0    2.97    0.63 
   5 -24   0    1.94    0.53 
   5 -24   0    2.50    0.35 
   5  24   0    2.90    0.62 
  -6 -24   0   -0.01    0.20 
   6 -24   0    0.05    0.16 
  -6 -24   0    0.50    0.34 
   6 -24   0    0.26    0.32 
  -6 -24   0    0.17    0.25 
   6  24   0   -0.09    0.30 
  -7 -24   0    2.96    0.53 
   7 -24   0    2.68    0.61 
   7 -24   0    3.04    0.41 
  -7 -24   0    2.78    0.63 
  -7 -24   0    3.51    0.64 
   7  24   0    2.70    0.65 
   0 -25   0    0.30    0.23 
   0 -25   0    0.17    0.18 
   0 -25   0    0.13    0.19 
   0  25   0    0.02    0.23 
   1 -25   0    0.41    0.27 
  -1 -25   0    0.50    0.30 
  -1 -25   0    0.48    0.26 
   1 -25   0    0.65    0.29 
   1 -25   0    0.51    0.20 
  -1 -25   0    0.35    0.22 
  -1  25   0    0.34    0.28 
   1  25   0    0.05    0.27 
   2 -25   0    1.35    0.42 
  -2 -25   0    0.99    0.32 
   2 -25   0    0.79    0.21 
  -2 -25   0    0.61    0.25 
  -2 -25   0    0.94    0.34 
   2  25   0    0.49    0.31 
  -2  25   0    0.51    0.34 
  -3 -25   0    5.31    0.74 
   3 -25   0    5.14    0.50 
   3 -25   0    5.54    0.78 
  -3 -25   0    4.10    0.60 
  -3  25   0    5.00    0.74 
   3  25   0    4.33    0.73 
  -4 -25   0    0.20    0.22 
   4 -25   0    0.08    0.15 
  -4 -25   0    0.26    0.28 
   4 -25   0    0.04    0.20 
   4  25   0    0.16    0.28 
  -5 -25   0   12.71    1.03 
   5 -25   0   11.51    1.18 
  -5 -25   0   11.29    0.92 
   5 -25   0   11.45    0.65 
   5  25   0   10.67    1.21 
   6 -25   0    5.24    0.50 
  -6 -25   0    5.21    0.76 
  -6 -25   0    4.52    0.77 
   6 -25   0    4.51    0.78 
  -6 -25   0    5.02    0.64 
   6  25   0    4.97    0.86 
   0 -26   0    0.15    0.22 
   0 -26   0    0.17    0.18 
   0 -26   0   -0.05    0.20 
   0  26   0    0.08    0.25 
   1 -26   0    0.90    0.25 
   1 -26   0    1.21    0.37 
  -1 -26   0    0.85    0.34 
  -1 -26   0    1.12    0.31 
  -1 -26   0    1.59    0.41 
  -1  26   0    1.12    0.40 
   1  26   0    0.48    0.33 
  -2 -26   0    0.62    0.31 
   2 -26   0    0.15    0.16 
  -2 -26   0    0.54    0.25 
   2 -26   0   -0.07    0.22 
  -2 -26   0   -0.04    0.22 
  -2  26   0    0.29    0.29 
   2  26   0    0.49    0.34 
   3 -26   0   14.96    0.77 
   3 -26   0   15.53    1.15 
  -3 -26   0   15.16    1.00 
  -3 -26   0   14.21    1.07 
   3  26   0   15.60    1.19 
   4 -26   0    0.13    0.26 
  -4 -26   0   -0.15    0.24 
   4 -26   0    0.00    0.15 
  -4 -26   0   -0.11    0.18 
   4  26   0    0.11    0.26 
   5 -26   0    1.73    0.28 
  -5 -26   0    0.46    0.34 
  -5 -26   0    1.52    0.42 
   5 -26   0    0.93    0.40 
   5  26   0    1.05    0.46 
   0 -27   0   -0.08    0.21 
   0 -27   0    0.18    0.26 
   0 -27   0    0.33    0.20 
   0  27   0    0.11    0.29 
  -1 -27   0    1.17    0.38 
   1 -27   0    0.34    0.20 
  -1 -27   0    0.06    0.19 
  -1 -27   0    0.68    0.33 
   1 -27   0    0.64    0.30 
   1  27   0    0.33    0.31 
  -1  27   0    0.62    0.37 
  -2 -27   0    3.87    0.66 
   2 -27   0    3.05    0.39 
  -2 -27   0    3.47    0.53 
  -2 -27   0    2.11    0.47 
   2 -27   0    3.70    0.68 
   2  27   0    3.64    0.69 
   3 -27   0    0.49    0.34 
   3 -27   0    0.44    0.19 
  -3 -27   0    0.14    0.29 
  -3 -27   0    0.71    0.28 
   3  27   0    0.93    0.44 
  -4 -27   0    0.48    0.32 
   4 -27   0    0.81    0.20 
   4 -27   0    0.31    0.32 
  -4 -27   0    0.57    0.29 
   4  27   0    0.37    0.37 
   5 -27   0   -0.03    0.12 
  -5 -27   0    0.19    0.24 
  -5 -27   0   -0.25    0.26 
   5  27   0    0.26    0.34 
   0 -28   0    1.33    0.40 
   0 -28   0    1.53    0.32 
   0  28   0    1.82    0.52 
   1 -28   0   -0.13    0.22 
  -1 -28   0    0.22    0.29 
   1 -28   0    0.11    0.17 
  -1 -28   0    0.58    0.33 
  -1 -28   0    0.34    0.22 
   1  28   0   -0.07    0.26 
   2 -28   0    9.80    1.10 
   2 -28   0    9.78    0.60 
  -2 -28   0   10.75    1.07 
  -2 -28   0   10.22    0.78 
   2  28   0    8.55    1.06 
  -3 -28   0    9.63    0.77 
  -3 -28   0    8.01    0.98 
   3 -28   0    6.87    0.96 
   3 -28   0    7.99    0.49 
   3  28   0    7.59    1.03 
  -4 -28   0   -0.16    0.28 
  -4 -28   0    0.67    0.28 
   4  28   0    0.22    0.36 
   0 -29   0    0.12    0.18 
   0 -29   0    0.26    0.30 
  -1 -29   0    1.71    0.37 
   1 -29   0    1.30    0.46 
   1 -29   0    1.34    0.29 
  -1 -29   0    0.83    0.40 
  -2 -29   0   -0.09    0.25 
   2 -29   0    0.06    0.14 
  -2 -29   0    0.08    0.19 
   2 -29   0    0.04    0.28 
   2  29   0   -0.11    0.27 
  12   0  -1   -0.15    0.18 
  11   0  -1    0.16    0.19 
  11   0  -1    0.36    0.29 
 -11   0   1   -0.25    0.15 
  11   0  -1   -0.22    0.15 
  10   0  -1   -0.03    0.17 
  10   0  -1   -0.04    0.13 
  10   0  -1    0.08    0.16 
 -10   0   1   -0.05    0.16 
 -10   0   1    0.02    0.14 
  -9   0   1    2.44    0.36 
   9   0  -1    2.89    0.51 
  -9   0   1    2.17    0.40 
   9   0  -1    2.97    0.46 
   9   0  -1    2.84    0.41 
  -8   0   1   -0.11    0.10 
  -8   0   1   -0.06    0.10 
   8   0  -1   -0.03    0.12 
   8   0  -1    0.10    0.13 
   8   0  -1   -0.04    0.11 
   7   0  -1    0.04    0.13 
   7   0  -1    0.10    0.12 
  -7   0   1    0.06    0.10 
  -7   0   1    0.00    0.12 
   7   0  -1    0.10    0.14 
   6   0  -1   -0.09    0.07 
  -6   0   1   -0.04    0.10 
  -6   0   1    0.06    0.10 
  -6   0   1   -0.05    0.10 
   6   0  -1    0.18    0.12 
   6   0  -1    0.02    0.09 
   5   0  -1  148.89    4.71 
   5   0  -1  150.11    4.61 
  -5   0   1  151.06    4.65 
   5   0  -1  147.96    4.64 
  -5   0   1  147.24    4.58 
  -5   0   1  147.86    4.64 
   4   0  -1    0.03    0.03 
   4   0  -1   -0.03    0.07 
  -4   0   1    0.08    0.09 
  -4   0   1   -0.01    0.06 
   4   0  -1    0.08    0.07 
  -4   0   1   -0.03    0.06 
   4   0  -1    0.04    0.06 
   3   0  -1  197.57    5.66 
   3   0  -1  194.31    5.77 
   3   0  -1  196.34    5.79 
   3   0  -1  189.28    5.82 
  -3   0   1  194.00    5.79 
  -3   0   1  189.17    5.79 
  -3   0   1  192.27    5.75 
   2   0  -1   -0.02    0.04 
   2   0  -1   -0.01    0.04 
  -2   0   1    0.02    0.04 
   2   0  -1   -0.02    0.03 
   2   0  -1   -0.02    0.02 
  -2   0   1   -0.02    0.03 
  -2   0   1   -0.02    0.03 
   1   0  -1   22.82    0.75 
   1   0  -1   22.94    0.73 
  -1   0   1   23.24    0.74 
  -1   0   1   23.70    0.74 
   1   0  -1   22.79    0.72 
   0   0   1    0.01    0.01 
   0   0   1   -0.01    0.01 
   0   0   1    0.00    0.01 
   0   0  -1   -0.01    0.01 
   0   0   1    0.00    0.01 
   0   0  -1   -0.01    0.01 
   0   0   1    0.01    0.01 
   1   0   1  926.48   28.67 
  -1   0  -1 1000.00   28.97 
   1   0   1  942.42   28.53 
   1   0   1  971.21   28.86 
   1   0   1  972.53   28.77 
  -1   0  -1  950.32   28.82 
   1   0   1  981.94   28.93 
   2   0   1   -0.11    0.04 
  -2   0  -1   -0.12    0.03 
   2   0   1   -0.07    0.04 
  -2   0  -1    0.03    0.06 
   2   0   1   -0.08    0.03 
  -3   0  -1   19.76    0.80 
   3   0   1   20.28    0.81 
   3   0   1   21.42    0.81 
   3   0   1   19.52    0.80 
  -3   0  -1   19.66    0.78 
  -4   0  -1   -0.05    0.07 
   4   0   1    0.00    0.07 
   4   0   1    0.15    0.09 
  -4   0  -1   -0.03    0.06 
   4   0   1   -0.01    0.06 
  -4   0  -1    0.01    0.07 
  -5   0  -1    9.47    0.53 
  -5   0  -1    9.20    0.51 
   5   0   1    8.21    0.52 
  -5   0  -1    8.40    0.52 
   5   0   1    7.69    0.52 
   5   0   1    7.91    0.50 
   6   0   1    0.02    0.09 
   6   0   1    0.02    0.10 
  -6   0  -1   -0.01    0.10 
   6   0   1    0.05    0.12 
  -6   0  -1    0.05    0.10 
  -6   0  -1    0.08    0.11 
   7   0   1   10.56    0.72 
  -7   0  -1   11.96    0.71 
  -7   0  -1   11.07    0.66 
   7   0   1   12.49    0.71 
   7   0   1   10.36    0.68 
  -8   0  -1   -0.05    0.12 
   8   0   1   -0.08    0.10 
  -8   0  -1    0.12    0.15 
   8   0   1   -0.09    0.11 
   8   0   1    0.08    0.14 
  -9   0  -1    1.69    0.35 
   9   0   1    1.60    0.37 
  -9   0  -1    1.77    0.33 
   9   0   1    1.95    0.45 
   9   0   1    1.15    0.29 
  10   0   1   -0.10    0.17 
  10   0   1    0.10    0.18 
  10   0   1   -0.16    0.16 
 -10   0  -1   -0.14    0.16 
  11   0   1    4.76    0.65 
  11   0   1    3.31    0.57 
  11   0   1    4.12    0.58 
 -11   0  -1    3.94    0.54 
  12   0   1    0.09    0.29 
  12   0   1    0.30    0.26 
  12  -1  -1    1.92    0.44 
  12   1  -1    3.14    0.53 
  12   1  -1    1.90    0.52 
  11  -1  -1    3.93    0.55 
  11  -1  -1    3.23    0.51 
 -11  -1   1    3.26    0.50 
  11   1  -1    4.08    0.67 
  11   1  -1    3.89    0.56 
 -10  -1   1    0.12    0.16 
 -10  -1   1    0.18    0.20 
  10  -1  -1   -0.02    0.16 
  10  -1  -1   -0.01    0.19 
  10  -1  -1    0.23    0.18 
  10   1  -1    0.02    0.17 
  10   1  -1    0.07    0.15 
 -10   1   1   -0.10    0.14 
  10   1  -1   -0.08    0.15 
  -9  -1   1    0.74    0.26 
   9  -1  -1    0.18    0.16 
   9  -1  -1    0.24    0.21 
  -9  -1   1    0.61    0.21 
   9  -1  -1    0.66    0.24 
   9   1  -1    0.41    0.20 
  -9   1   1    0.93    0.29 
   9   1  -1    0.47    0.22 
  -9   1   1    0.66    0.22 
   9   1  -1    0.28    0.19 
   8  -1  -1   11.48    0.70 
   8  -1  -1   11.83    0.73 
  -8  -1   1   12.59    0.77 
  -8  -1   1   11.92    0.70 
   8  -1  -1   11.98    0.81 
   8   1  -1   11.22    0.71 
  -8   1   1   12.85    0.69 
   8   1  -1   12.84    0.77 
   8   1  -1   12.26    0.82 
  -8   1   1   12.30    0.75 
   7  -1  -1   10.41    0.61 
   7  -1  -1    9.58    0.67 
  -7  -1   1   10.04    0.60 
   7  -1  -1   10.95    0.65 
  -7  -1   1    9.70    0.65 
  -7   1   1   10.86    0.66 
  -7   1   1    9.74    0.57 
   7   1  -1   11.52    0.65 
   7   1  -1   11.25    0.67 
   7   1  -1   11.64    0.73 
  -6  -1   1   26.30    1.14 
   6  -1  -1   25.19    1.09 
  -6  -1   1   27.51    1.08 
  -6  -1   1   27.13    1.14 
   6  -1  -1   27.07    1.18 
   6  -1  -1   25.93    1.08 
   6   1  -1   26.72    1.13 
   6   1  -1   25.21    1.17 
  -6   1   1   27.15    1.05 
   6   1  -1   25.17    1.09 
  -6   1   1   28.84    1.14 
  -6   1   1   24.99    1.09 
  -5  -1   1   24.27    0.96 
   5  -1  -1   24.39    0.86 
  -5  -1   1   24.99    1.02 
   5  -1  -1   24.72    0.99 
   5  -1  -1   23.25    1.03 
   5  -1  -1   23.82    0.96 
  -5  -1   1   25.20    1.02 
  -5   1   1   24.95    0.99 
   5   1  -1   24.28    1.01 
  -5   1   1   24.77    1.00 
   5   1  -1   21.37    1.02 
   5   1  -1   24.75    0.99 
  -5   1   1   22.91    0.92 
  -4  -1   1   31.41    1.18 
  -4  -1   1   32.35    1.14 
   4  -1  -1   30.00    1.12 
   4  -1  -1   32.09    1.15 
   4  -1  -1   30.64    1.04 
   4  -1  -1   31.66    1.20 
  -4  -1   1   31.14    1.18 
   4   1  -1   32.25    1.16 
  -4   1   1   31.20    1.10 
   4   1  -1   32.97    1.23 
  -4   1   1   30.61    1.15 
   4   1  -1   31.87    1.17 
  -4   1   1   32.07    1.16 
   3  -1  -1    1.31    0.13 
  -3  -1   1    1.39    0.18 
   3  -1  -1    1.82    0.22 
  -3  -1   1    1.72    0.21 
  -3  -1   1    1.39    0.17 
   3  -1  -1    1.61    0.17 
   3  -1  -1    2.36    0.22 
   3   1  -1    1.54    0.18 
   3   1  -1    1.65    0.21 
   3   1  -1    1.82    0.21 
  -3   1   1    1.47    0.16 
  -3   1   1    1.35    0.17 
   3   1  -1    1.55    0.08 
  -3   1   1    2.07    0.21 
  -2  -1   1   43.78    1.42 
   2  -1  -1   44.09    1.42 
  -2  -1   1   44.75    1.39 
   2  -1  -1   44.89    1.39 
   2  -1  -1   44.62    1.38 
  -2  -1   1   42.91    1.42 
   2  -1  -1   44.59    1.35 
  -2   1   1   43.86    1.39 
   2   1  -1   43.83    1.40 
   2   1  -1   44.14    1.44 
   2   1  -1   41.70    1.41 
   2   1  -1   43.11    1.30 
  -2   1   1   45.49    1.41 
  -2   1   1   42.77    1.36 
  -1  -1   1    0.74    0.09 
  -1  -1   1    0.53    0.07 
  -1  -1   1    0.53    0.08 
   1  -1  -1    0.66    0.08 
   1  -1  -1    0.55    0.06 
   1   1  -1    0.47    0.08 
   1   1  -1    0.50    0.07 
   1   1  -1    0.64    0.08 
  -1   1   1    0.56    0.08 
  -1   1   1    0.70    0.08 
   0  -1   1   12.21    0.39 
   0  -1   1   13.06    0.40 
   0  -1   1   12.60    0.39 
   0  -1   1   12.94    0.39 
   0   1  -1   13.65    0.40 
   0   1   1   12.78    0.43 
   1  -1   1   19.45    0.64 
   1  -1   1   19.31    0.62 
   1  -1   1   19.39    0.65 
   1  -1   1   18.88    0.64 
  -1  -1  -1   18.72    0.67 
   1  -1   1   18.31    0.63 
   1  -1   1   18.55    0.63 
   1   1   1   19.15    0.66 
  -1   1  -1   18.97    0.62 
   1   1   1   18.41    0.67 
  -2  -1  -1  151.78    4.60 
   2  -1   1  152.20    4.59 
   2  -1   1  152.37    4.57 
   2  -1   1  147.63    4.57 
   2  -1   1  150.87    4.57 
  -2  -1  -1  152.79    4.62 
  -2   1  -1  153.77    4.57 
  -2   1  -1  154.80    4.55 
   2   1   1  153.70    4.62 
   2   1   1  153.85    4.61 
   2   1   1  156.95    4.61 
   3  -1   1   -0.03    0.05 
   3  -1   1    0.06    0.06 
  -3  -1  -1    0.01    0.06 
   3  -1   1    0.04    0.07 
  -3  -1  -1    0.12    0.08 
  -3   1  -1    0.03    0.06 
   3   1   1   -0.05    0.05 
  -3   1  -1   -0.04    0.05 
   3   1   1    0.24    0.09 
  -3   1  -1    0.02    0.06 
   3   1   1    0.03    0.06 
  -4  -1  -1    7.17    0.43 
  -4  -1  -1    7.01    0.45 
   4  -1   1    7.52    0.43 
   4  -1   1    7.75    0.44 
   4  -1   1    8.51    0.47 
  -4  -1  -1    7.43    0.45 
  -4   1  -1    6.88    0.41 
  -4   1  -1    7.56    0.43 
   4   1   1    7.78    0.47 
  -4   1  -1    7.46    0.41 
   4   1   1    7.43    0.46 
   4   1   1    6.84    0.44 
   5  -1   1    0.33    0.14 
  -5  -1  -1    0.35    0.15 
   5  -1   1    0.36    0.14 
  -5  -1  -1    0.26    0.13 
  -5  -1  -1    0.29    0.13 
   5  -1   1    0.30    0.12 
  -5   1  -1    0.36    0.14 
   5   1   1    0.46    0.16 
  -5   1  -1    0.14    0.10 
   5   1   1    0.17    0.12 
  -5   1  -1    0.36    0.14 
   5   1   1    0.29    0.13 
  -6  -1  -1    6.49    0.50 
   6  -1   1    7.54    0.53 
   6  -1   1    7.56    0.50 
   6  -1   1    7.31    0.50 
  -6  -1  -1    8.18    0.53 
  -6  -1  -1    6.96    0.49 
   6   1   1    6.94    0.53 
   6   1   1    6.45    0.49 
   6   1   1    6.72    0.51 
  -6   1  -1    7.10    0.48 
  -6   1  -1    6.62    0.45 
   7  -1   1   49.52    1.96 
  -7  -1  -1   51.14    1.90 
   7  -1   1   50.20    1.91 
  -7  -1  -1   49.97    1.93 
   7  -1   1   50.29    1.90 
   7   1   1   50.90    1.95 
   7   1   1   48.14    1.91 
   7   1   1   49.27    2.00 
  -7   1  -1   52.15    1.90 
  -7   1  -1   50.73    1.86 
  -8  -1  -1    4.05    0.51 
   8  -1   1    3.31    0.46 
  -8  -1  -1    3.51    0.46 
   8  -1   1    4.03    0.48 
   8  -1   1    3.46    0.51 
   8   1   1    4.36    0.57 
   8   1   1    3.32    0.46 
  -8   1  -1    3.48    0.43 
   8   1   1    4.30    0.55 
  -8   1  -1    2.99    0.43 
  -9  -1  -1   16.30    0.93 
   9  -1   1   15.30    0.94 
   9  -1   1   17.59    1.06 
   9  -1   1   18.81    0.99 
  -9  -1  -1   19.57    1.04 
   9   1   1   17.01    0.98 
  -9   1  -1   15.47    0.98 
   9   1   1   17.75    1.07 
   9   1   1   17.60    1.01 
  -9   1  -1   17.18    0.91 
  10  -1   1    2.17    0.40 
  10  -1   1    1.79    0.38 
  10  -1   1    2.83    0.53 
 -10  -1  -1    2.09    0.40 
 -10   1  -1    2.39    0.40 
  10   1   1    2.32    0.42 
  10   1   1    2.96    0.51 
  10   1   1    1.77    0.42 
  11  -1   1    1.39    0.41 
 -11  -1  -1    1.53    0.37 
  11  -1   1    1.78    0.40 
  11  -1   1    0.81    0.29 
 -11   1  -1    1.38    0.32 
  11   1   1    1.13    0.34 
  11   1   1    1.69    0.42 
  11   1   1    1.92    0.46 
 -12  -1  -1    1.23    0.36 
  12   1   1    2.35    0.54 
  12  -2  -1    0.58    0.30 
  12  -2  -1    0.16    0.21 
  12   2  -1    0.14    0.29 
  12   2  -1    0.11    0.23 
  11  -2  -1    0.55    0.25 
  11  -2  -1    0.70    0.28 
 -11  -2   1    0.76    0.28 
  11   2  -1    0.42    0.24 
  11   2  -1    0.76    0.34 
 -10  -2   1    4.47    0.55 
 -10  -2   1    3.78    0.56 
  10  -2  -1    4.02    0.54 
  10  -2  -1    3.90    0.51 
 -10   2   1    3.97    0.48 
  10   2  -1    3.96    0.53 
  10   2  -1    3.62    0.60 
   9  -2  -1    6.81    0.76 
  -9  -2   1    4.89    0.60 
   9  -2  -1    6.30    0.62 
  -9  -2   1    6.72    0.54 
   9  -2  -1    6.34    0.63 
   9   2  -1    5.28    0.58 
  -9   2   1    6.34    0.66 
   9   2  -1    6.22    0.77 
   9   2  -1    5.89    0.64 
  -9   2   1    5.92    0.47 
   8  -2  -1   24.27    1.13 
   8  -2  -1   23.38    1.09 
  -8  -2   1   24.87    1.20 
  -8  -2   1   23.77    1.10 
   8  -2  -1   23.86    1.21 
   8   2  -1   22.73    1.23 
  -8   2   1   25.68    1.06 
  -8   2   1   24.70    1.16 
   8   2  -1   24.12    1.14 
   8   2  -1   23.23    1.16 
   7  -2  -1    5.52    0.44 
  -7  -2   1    4.09    0.48 
   7  -2  -1    5.06    0.55 
   7  -2  -1    4.97    0.41 
  -7  -2   1    4.62    0.47 
   7   2  -1    6.12    0.47 
   7   2  -1    6.20    0.65 
  -7   2   1    5.47    0.39 
   7   2  -1    5.32    0.54 
  -7   2   1    5.71    0.55 
   6  -2  -1    2.56    0.36 
  -6  -2   1    2.39    0.36 
   6  -2  -1    1.87    0.28 
   6  -2  -1    2.84    0.27 
   6  -2  -1    3.36    0.36 
  -6  -2   1    3.04    0.34 
  -6  -2   1    2.32    0.34 
   6   2  -1    2.05    0.33 
  -6   2   1    2.62    0.29 
  -6   2   1    2.64    0.33 
   6   2  -1    2.22    0.37 
  -6   2   1    2.88    0.36 
   6   2  -1    2.50    0.33 
   5  -2  -1    2.91    0.32 
   5  -2  -1    3.31    0.27 
   5  -2  -1    2.87    0.22 
  -5  -2   1    3.64    0.35 
   5  -2  -1    2.73    0.34 
  -5  -2   1    2.84    0.34 
  -5  -2   1    3.74    0.40 
   5   2  -1    3.47    0.37 
  -5   2   1    3.58    0.36 
  -5   2   1    2.83    0.33 
   5   2  -1    2.93    0.33 
  -5   2   1    3.04    0.24 
   5   2  -1    3.20    0.40 
   4  -2  -1   24.69    0.96 
   4  -2  -1   25.53    0.95 
  -4  -2   1   26.18    1.02 
  -4  -2   1   25.35    0.97 
  -4  -2   1   25.02    1.02 
   4  -2  -1   26.87    1.03 
   4  -2  -1   25.72    0.90 
  -4   2   1   26.98    0.92 
  -4   2   1   24.98    0.96 
  -4   2   1   25.13    0.97 
   4   2  -1   25.38    1.05 
   4   2  -1   26.38    1.00 
   4   2  -1   25.86    1.02 
   3  -2  -1  112.59    3.59 
  -3  -2   1  117.63    3.61 
   3  -2  -1  116.29    3.53 
  -3  -2   1  117.51    3.56 
   3  -2  -1  116.05    3.50 
   3  -2  -1  118.30    3.55 
  -3   2   1  118.22    3.55 
   3   2  -1  115.57    3.63 
   3   2  -1  116.84    3.60 
   3   2  -1  114.88    3.57 
  -3   2   1  115.92    3.50 
  -3   2   1  117.86    3.56 
   2  -2  -1  102.07    3.06 
  -2  -2   1  100.52    3.12 
   2  -2  -1  103.28    3.06 
  -2  -2   1  105.53    3.10 
   2  -2  -1  102.80    3.07 
  -2  -2   1  103.16    3.12 
   2   2  -1   98.83    3.09 
   2   2  -1  101.26    3.12 
  -2   2   1  103.04    3.08 
  -1  -2   1   24.48    0.77 
  -1  -2   1   23.69    0.79 
   1  -2  -1   24.05    0.77 
   1  -2  -1   24.29    0.76 
  -1  -2   1   23.72    0.79 
   1  -2  -1   23.24    0.76 
  -1  -2   1   24.48    0.82 
   1   2  -1   24.00    0.80 
   1   2  -1   23.36    0.76 
   1   2  -1   24.65    0.79 
  -1   2   1   24.39    0.77 
  -1   2   1   24.99    0.77 
   0  -2   1    3.04    0.15 
   0  -2  -1    2.88    0.15 
   0  -2   1    2.94    0.10 
   0  -2  -1    2.93    0.15 
   0  -2   1    2.93    0.12 
   0  -2   1    2.97    0.11 
   0   2   1    3.06    0.16 
   0   2   1    2.88    0.15 
   0   2  -1    3.01    0.12 
   0   2   1    3.14    0.16 
   1  -2   1   31.79    1.02 
   1  -2   1   33.10    1.02 
  -1  -2  -1   33.49    1.10 
   1  -2   1   32.15    1.01 
   1  -2   1   32.60    1.02 
   1  -2   1   32.97    1.07 
  -1  -2  -1   34.42    1.11 
   1   2   1   35.20    1.11 
   1   2   1   31.26    1.10 
  -1   2  -1   32.18    1.00 
   1   2   1   33.23    1.09 
  -2  -2  -1   47.27    1.55 
   2  -2   1   44.98    1.46 
   2  -2   1   46.56    1.47 
   2  -2   1   44.23    1.45 
  -2  -2  -1   47.30    1.54 
   2  -2   1   46.12    1.48 
   2  -2   1   45.07    1.46 
   2   2   1   44.16    1.53 
   2   2   1   46.67    1.55 
  -2   2  -1   46.56    1.44 
   2   2   1   46.87    1.54 
   3  -2   1   20.89    0.79 
  -3  -2  -1   20.22    0.85 
  -3  -2  -1   22.16    0.86 
   3  -2   1   20.21    0.79 
   3  -2   1   21.65    0.81 
   3  -2   1   21.41    0.82 
   3   2   1   20.07    0.85 
  -3   2  -1   22.04    0.85 
   3   2   1   20.39    0.86 
  -3   2  -1   21.69    0.78 
  -3   2  -1   19.64    0.77 
   3   2   1   20.76    0.85 
   4  -2   1   24.09    1.01 
  -4  -2  -1   25.97    1.06 
   4  -2   1   26.20    1.01 
  -4  -2  -1   28.41    1.10 
   4  -2   1   26.95    1.02 
  -4  -2  -1   26.50    1.05 
   4   2   1   25.54    1.07 
  -4   2  -1   27.58    1.00 
   4   2   1   26.80    1.09 
  -4   2  -1   25.34    1.00 
  -4   2  -1   26.43    0.99 
   4   2   1   27.85    1.10 
   5  -2   1    0.61    0.16 
  -5  -2  -1    0.28    0.14 
  -5  -2  -1    0.68    0.20 
   5  -2   1    0.48    0.15 
   5  -2   1    0.42    0.15 
  -5  -2  -1    0.77    0.20 
   5   2   1    0.77    0.20 
  -5   2  -1    0.70    0.17 
   5   2   1    0.68    0.20 
   5   2   1    0.43    0.15 
  -5   2  -1    0.68    0.18 
  -5   2  -1    0.57    0.15 
   6  -2   1    0.12    0.13 
  -6  -2  -1    0.34    0.16 
  -6  -2  -1    0.20    0.15 
   6  -2   1    0.25    0.14 
   6  -2   1    0.21    0.13 
  -6  -2  -1    0.19    0.15 
  -6   2  -1    0.22    0.12 
   6   2   1    0.45    0.18 
   6   2   1    0.30    0.15 
  -6   2  -1    0.25    0.13 
   6   2   1    0.18    0.15 
  -7  -2  -1    7.57    0.55 
  -7  -2  -1    8.87    0.62 
   7  -2   1    7.95    0.55 
   7  -2   1    9.30    0.64 
   7  -2   1    8.15    0.56 
   7   2   1    8.51    0.62 
  -7   2  -1    8.84    0.56 
  -7   2  -1    9.11    0.54 
   7   2   1    7.73    0.63 
   7   2   1    7.98    0.59 
  -8  -2  -1   11.58    0.72 
   8  -2   1   11.27    0.70 
  -8  -2  -1   11.38    0.75 
   8  -2   1   11.65    0.78 
   8   2   1    8.05    0.64 
  -8   2  -1   10.40    0.64 
   8   2   1   10.63    0.78 
  -8   2  -1   10.49    0.68 
   8   2   1   10.91    0.74 
  -9  -2  -1    1.62    0.37 
   9  -2   1    1.25    0.30 
  -9  -2  -1    1.17    0.30 
   9  -2   1    1.70    0.34 
   9  -2   1    1.34    0.35 
   9   2   1    0.74    0.27 
   9   2   1    1.90    0.38 
  -9   2  -1    1.08    0.27 
   9   2   1    1.81    0.44 
  10  -2   1    2.47    0.50 
 -10  -2  -1    1.82    0.37 
 -10  -2  -1    1.30    0.37 
  10  -2   1    2.13    0.44 
  10  -2   1    1.87    0.37 
  10   2   1    1.72    0.45 
 -10   2  -1    1.38    0.30 
  10   2   1    1.56    0.38 
  10   2   1    1.55    0.35 
 -11  -2  -1    1.42    0.36 
  11  -2   1    2.85    0.48 
  11  -2   1    1.99    0.42 
  11   2   1    2.21    0.46 
  11   2   1    1.51    0.44 
 -12  -2  -1   10.63    0.80 
  12  -2   1    8.77    0.91 
  12   2   1    9.49    1.10 
 -12  -3   1    0.98    0.30 
  12  -3  -1    1.88    0.43 
  12   3  -1    1.34    0.50 
  12   3  -1    0.39    0.28 
  11  -3  -1    0.06    0.20 
  11  -3  -1    0.14    0.18 
 -11  -3   1   -0.04    0.17 
 -11  -3   1    0.14    0.22 
  11   3  -1    0.02    0.18 
  11   3  -1    0.07    0.23 
 -10  -3   1    0.07    0.16 
  10  -3  -1    0.18    0.19 
  10  -3  -1    0.13    0.16 
 -10  -3   1    0.23    0.20 
  10   3  -1    0.14    0.23 
  10   3  -1    0.25    0.20 
   9  -3  -1    3.79    0.46 
  -9  -3   1    1.95    0.40 
   9  -3  -1    2.92    0.42 
  -9  -3   1    3.56    0.46 
  -9   3   1    3.38    0.48 
  -9   3   1    2.85    0.38 
   9   3  -1    3.23    0.45 
   9   3  -1    3.65    0.57 
   9   3  -1    3.31    0.49 
  -8  -3   1   13.50    0.77 
  -8  -3   1   12.47    0.82 
   8  -3  -1   13.80    0.75 
   8  -3  -1   13.92    0.78 
   8   3  -1   15.90    0.84 
  -8   3   1   13.03    0.78 
  -8   3   1   13.07    0.69 
   8   3  -1   12.88    0.87 
   8   3  -1   13.09    0.81 
   7  -3  -1   21.36    0.97 
   7  -3  -1   20.06    1.04 
   7  -3  -1   21.45    0.95 
  -7  -3   1   21.24    1.05 
  -7  -3   1   19.78    1.02 
  -7  -3   1   21.55    0.99 
   7   3  -1   22.37    1.05 
   7   3  -1   19.73    1.08 
  -7   3   1   21.46    0.99 
  -7   3   1   21.00    0.89 
   7   3  -1   20.85    1.00 
  -6  -3   1   14.53    0.75 
  -6  -3   1   16.07    0.82 
   6  -3  -1   16.09    0.82 
   6  -3  -1   14.92    0.66 
  -6  -3   1   14.88    0.80 
   6  -3  -1   17.07    0.74 
   6  -3  -1   14.68    0.73 
   6   3  -1   15.23    0.77 
   6   3  -1   14.84    0.79 
   6   3  -1   16.55    0.87 
  -6   3   1   13.98    0.73 
  -6   3   1   15.41    0.68 
   5  -3  -1    8.37    0.45 
  -5  -3   1    7.15    0.49 
  -5  -3   1    8.49    0.48 
   5  -3  -1    7.82    0.50 
   5  -3  -1    7.30    0.40 
   5  -3  -1    7.75    0.45 
   5   3  -1    8.98    0.53 
  -5   3   1    8.36    0.46 
  -5   3   1    7.96    0.40 
   5   3  -1    7.72    0.53 
   5   3  -1    7.02    0.46 
  -5   3   1    7.46    0.45 
  -4  -3   1   13.90    0.64 
  -4  -3   1   15.92    0.70 
   4  -3  -1   13.19    0.58 
   4  -3  -1   13.93    0.58 
   4  -3  -1   14.95    0.62 
  -4  -3   1   14.17    0.68 
  -4   3   1   13.96    0.61 
  -4   3   1   14.93    0.63 
   4   3  -1   13.94    0.70 
   4   3  -1   14.27    0.67 
   4   3  -1   14.01    0.65 
  -4   3   1   13.89    0.56 
  -3  -3   1    5.83    0.35 
  -3  -3   1    4.67    0.32 
   3  -3  -1    5.31    0.28 
   3  -3  -1    5.44    0.29 
   3  -3  -1    4.82    0.27 
  -3  -3   1    5.48    0.31 
   3   3  -1    5.43    0.34 
   3   3  -1    4.97    0.34 
  -3   3   1    5.84    0.30 
  -3   3   1    5.33    0.29 
   3   3  -1    5.46    0.32 
  -3   3   1    5.96    0.26 
   2  -3  -1  107.58    3.26 
   2  -3  -1  107.18    3.25 
  -2  -3   1  108.59    3.33 
  -2  -3   1  107.94    3.30 
   2  -3  -1  109.89    3.31 
   2  -3  -1  110.60    3.28 
  -2  -3   1  109.84    3.33 
  -2   3   1  108.37    3.26 
   2   3  -1  107.63    3.35 
  -2   3   1  114.81    3.28 
   2   3  -1  105.75    3.30 
   2   3  -1  108.95    3.18 
   2   3  -1  107.53    3.32 
  -1  -3   1   59.84    1.90 
   1  -3  -1   63.32    1.89 
   1  -3  -1   61.80    1.87 
   1  -3  -1   61.22    1.87 
  -1  -3   1   61.89    1.86 
   1  -3  -1   60.05    1.86 
  -1  -3   1   64.04    1.90 
  -1  -3   1   60.06    1.90 
  -1  -3   1   62.63    1.88 
   1   3  -1   61.58    1.87 
  -1   3   1   64.34    1.88 
  -1   3   1   61.06    1.87 
   1   3  -1   61.92    1.90 
   1   3  -1   62.30    1.92 
   0  -3   1   91.35    2.77 
   0  -3  -1   94.12    2.85 
   0  -3  -1   92.84    2.83 
   0  -3   1   93.28    2.77 
   0  -3   1   92.93    2.77 
   0  -3   1   97.89    2.84 
   0  -3   1   93.80    2.75 
   0   3  -1   96.86    2.81 
   0   3   1   95.26    2.85 
   0   3   1   96.53    2.86 
   0   3   1   96.34    2.85 
   1  -3   1  356.95   10.68 
  -1  -3  -1  381.36   10.74 
   1  -3   1  354.96   10.76 
   1  -3   1  363.60   10.73 
   1  -3   1  359.29   10.76 
  -1  -3  -1  374.73   10.73 
   1  -3   1  362.28   10.82 
   1   3   1  359.13   10.72 
  -1   3  -1  354.07   10.71 
   1   3   1  368.51   10.74 
   1   3   1  382.18   10.74 
  -2  -3  -1    2.47    0.26 
   2  -3   1    2.55    0.16 
  -2  -3  -1    2.83    0.28 
   2  -3   1    2.20    0.15 
   2  -3   1    2.72    0.19 
   2  -3   1    2.28    0.16 
  -2   3  -1    2.60    0.15 
   2   3   1    2.89    0.28 
   2   3   1    2.11    0.24 
   2   3   1    2.66    0.26 
   3  -3   1    0.11    0.07 
   3  -3   1    0.00    0.05 
   3  -3   1    0.03    0.05 
  -3  -3  -1    0.00    0.07 
   3  -3   1    0.02    0.05 
  -3  -3  -1    0.05    0.08 
   3  -3   1   -0.05    0.04 
   3   3   1   -0.01    0.06 
  -3   3  -1   -0.02    0.05 
   3   3   1    0.08    0.09 
   3   3   1   -0.06    0.06 
  -3   3  -1   -0.03    0.04 
  -4  -3  -1    3.85    0.40 
  -4  -3  -1    4.28    0.35 
   4  -3   1    4.10    0.39 
   4  -3   1    3.70    0.27 
   4  -3   1    3.34    0.26 
   4  -3   1    4.23    0.31 
   4  -3   1    3.72    0.28 
  -4  -3  -1    4.06    0.42 
   4   3   1    4.32    0.35 
   4   3   1    3.50    0.37 
  -4   3  -1    3.76    0.26 
  -4   3  -1    3.70    0.26 
   4   3   1    3.99    0.40 
  -5  -3  -1   21.48    0.96 
  -5  -3  -1   20.83    0.98 
   5  -3   1   22.21    1.07 
   5  -3   1   22.80    0.91 
  -5  -3  -1   22.02    0.98 
   5  -3   1   20.04    0.92 
   5  -3   1   21.76    0.90 
  -5   3  -1   21.42    0.89 
   5   3   1   20.40    0.99 
   5   3   1   21.02    0.97 
  -5   3  -1   20.82    0.86 
  -5   3  -1   21.64    0.88 
   5   3   1   20.85    0.99 
  -6  -3  -1    2.89    0.38 
  -6  -3  -1    2.27    0.36 
   6  -3   1    3.51    0.38 
   6  -3   1    3.15    0.41 
   6  -3   1    3.03    0.36 
  -6  -3  -1    2.18    0.34 
  -6   3  -1    2.43    0.31 
  -6   3  -1    3.57    0.36 
   6   3   1    2.95    0.40 
   6   3   1    2.82    0.42 
   6   3   1    2.79    0.39 
  -7  -3  -1    0.39    0.20 
   7  -3   1    0.20    0.14 
  -7  -3  -1    0.46    0.20 
   7  -3   1    0.26    0.15 
   7  -3   1    0.46    0.17 
  -7   3  -1    0.34    0.15 
   7   3   1    0.35    0.20 
   7   3   1    0.62    0.21 
  -7   3  -1    0.18    0.13 
   7   3   1    0.46    0.21 
   8  -3   1    8.53    0.59 
   8  -3   1    7.44    0.56 
  -8  -3  -1    7.33    0.59 
   8  -3   1    7.05    0.72 
  -8  -3  -1    8.53    0.65 
  -8   3  -1    7.12    0.51 
   8   3   1    8.32    0.63 
   8   3   1    8.01    0.64 
  -8   3  -1    7.20    0.55 
   8   3   1    9.40    0.73 
   9  -3   1   13.83    0.82 
   9  -3   1   12.49    0.78 
  -9  -3  -1   12.89    0.81 
   9  -3   1   13.13    0.88 
  -9  -3  -1   12.70    0.87 
   9   3   1   12.20    0.89 
  -9   3  -1   12.68    0.73 
   9   3   1   12.06    0.82 
   9   3   1   12.96    0.87 
  10  -3   1   -0.09    0.14 
 -10  -3  -1    0.10    0.17 
 -10  -3  -1    0.29    0.25 
  10  -3   1    0.08    0.17 
 -10   3  -1   -0.02    0.13 
  10   3   1    0.09    0.23 
  10   3   1    0.04    0.18 
  10   3   1   -0.04    0.17 
 -11  -3  -1    1.14    0.35 
  11  -3   1    0.67    0.27 
  11  -3   1    0.93    0.30 
  11   3   1    0.82    0.37 
  11   3   1    1.87    0.42 
 -12  -3  -1    1.59    0.39 
  12  -3   1    2.40    0.45 
  12   3   1    1.56    0.54 
  12  -4  -1    6.22    0.73 
 -12  -4   1    4.36    0.61 
  12   4  -1    4.95    0.65 
  11  -4  -1    1.62    0.38 
  11  -4  -1    0.95    0.30 
 -11  -4   1    1.19    0.34 
 -11  -4   1    1.53    0.41 
  11   4  -1    1.76    0.41 
  11   4  -1    1.05    0.38 
 -10  -4   1    3.04    0.47 
  10  -4  -1    3.19    0.45 
  10  -4  -1    3.89    0.53 
 -10  -4   1    3.49    0.55 
  10   4  -1    3.25    0.52 
  10   4  -1    3.96    0.66 
  -9  -4   1    0.15    0.19 
  -9  -4   1    0.03    0.16 
   9  -4  -1    0.14    0.16 
   9  -4  -1    0.06    0.13 
   9   4  -1    0.46    0.24 
   9   4  -1    0.26    0.20 
  -8  -4   1    8.60    0.60 
   8  -4  -1    9.43    0.59 
   8  -4  -1    7.78    0.57 
  -8  -4   1    8.77    0.67 
   8   4  -1    9.21    0.67 
  -8   4   1    9.86    0.55 
  -8   4   1    7.88    0.58 
   8   4  -1    9.66    0.75 
   8   4  -1    8.18    0.61 
   7  -4  -1    2.92    0.37 
   7  -4  -1    2.89    0.34 
  -7  -4   1    3.02    0.43 
  -7  -4   1    2.81    0.42 
   7  -4  -1    2.54    0.31 
  -7  -4   1    3.27    0.42 
   7   4  -1    2.88    0.40 
  -7   4   1    2.87    0.32 
   7   4  -1    3.90    0.49 
  -7   4   1    2.38    0.33 
   7   4  -1    3.32    0.47 
  -6  -4   1    4.31    0.48 
   6  -4  -1    3.70    0.37 
  -6  -4   1    4.33    0.44 
   6  -4  -1    4.75    0.33 
   6  -4  -1    3.47    0.35 
  -6  -4   1    3.72    0.45 
   6   4  -1    3.47    0.40 
   6   4  -1    3.62    0.48 
  -6   4   1    4.00    0.29 
   6   4  -1    4.18    0.45 
  -6   4   1    3.86    0.39 
  -5  -4   1    4.10    0.43 
  -5  -4   1    5.37    0.51 
   5  -4  -1    4.78    0.32 
   5  -4  -1    4.45    0.32 
  -5  -4   1    5.12    0.37 
   5  -4  -1    4.83    0.32 
  -5   4   1    5.09    0.30 
   5   4  -1    5.34    0.52 
  -5   4   1    4.88    0.34 
   5   4  -1    4.84    0.39 
   5   4  -1    4.53    0.37 
  -5   4   1    4.39    0.33 
  -4  -4   1   12.03    0.62 
   4  -4  -1   11.68    0.52 
  -4  -4   1   11.52    0.61 
  -4  -4   1   12.42    0.59 
   4  -4  -1   12.35    0.54 
   4  -4  -1   11.58    0.53 
   4   4  -1   11.26    0.63 
   4   4  -1   10.66    0.59 
  -4   4   1   12.45    0.55 
  -4   4   1   12.29    0.54 
  -4   4   1   12.52    0.49 
   4   4  -1   11.60    0.58 
  -3  -4   1   16.10    0.68 
   3  -4  -1   16.41    0.62 
   3  -4  -1   14.48    0.64 
   3  -4  -1   16.51    0.63 
   3  -4  -1   16.74    0.65 
  -3  -4   1   16.90    0.72 
  -3  -4   1   17.55    0.73 
  -3   4   1   16.87    0.64 
   3   4  -1   16.63    0.69 
  -3   4   1   17.20    0.64 
   3   4  -1   16.49    0.74 
   3   4  -1   17.41    0.72 
   2  -4  -1   17.80    0.64 
  -2  -4   1   16.97    0.70 
  -2  -4   1   17.26    0.67 
   2  -4  -1   18.24    0.63 
  -2  -4   1   17.92    0.59 
  -2  -4   1   17.94    0.70 
   2  -4  -1   19.08    0.67 
   2  -4  -1   18.43    0.62 
   2   4  -1   17.63    0.72 
   2   4  -1   18.49    0.68 
   2   4  -1   16.84    0.69 
  -2   4   1   17.45    0.64 
  -1  -4   1   24.12    0.85 
   1  -4  -1   25.07    0.84 
  -1  -4   1   25.11    0.82 
  -1  -4   1   24.98    0.82 
   1  -4  -1   24.87    0.81 
  -1  -4   1   25.43    0.86 
  -1  -4   1   26.25    0.85 
   1  -4  -1   24.54    0.80 
   1  -4  -1   24.89    0.81 
   1   4  -1   24.46    0.87 
  -1   4   1   24.35    0.83 
   1   4  -1   24.57    0.81 
   0  -4  -1    5.63    0.25 
   0  -4  -1    5.32    0.26 
   0  -4   1    5.44    0.20 
   0  -4   1    5.02    0.20 
   0  -4   1    5.44    0.26 
   0  -4   1    5.20    0.21 
   0  -4  -1    5.82    0.27 
   0  -4  -1    5.28    0.27 
   0  -4   1    5.27    0.21 
   0  -4   1    4.95    0.21 
   0   4   1    5.32    0.27 
   0   4  -1    5.36    0.24 
   0   4  -1    5.19    0.17 
   0   4   1    6.01    0.28 
   0   4   1    5.26    0.27 
   1  -4   1  171.74    5.10 
  -1  -4  -1  179.79    5.28 
  -1  -4  -1  177.40    5.27 
   1  -4   1  174.76    5.11 
   1  -4   1  173.74    5.10 
   1  -4   1  178.43    5.23 
   1  -4   1  174.46    5.10 
   1   4   1  172.87    5.27 
   1   4   1  172.73    5.26 
   1   4   1  178.59    5.28 
   2  -4   1    1.31    0.11 
   2  -4   1    1.23    0.16 
  -2  -4  -1    0.99    0.17 
   2  -4   1    1.59    0.15 
  -2  -4  -1    1.60    0.22 
   2  -4   1    1.26    0.10 
  -2   4  -1    1.24    0.09 
   2   4   1    1.47    0.21 
   2   4   1    1.58    0.22 
   2   4   1    1.73    0.22 
  -3  -4  -1   50.88    1.82 
   3  -4   1   51.01    1.71 
   3  -4   1   53.94    1.75 
   3  -4   1   52.14    1.68 
   3  -4   1   51.42    1.67 
  -3   4  -1   50.82    1.66 
  -3   4  -1   55.98    1.67 
   3   4   1   52.16    1.84 
   3   4   1   52.82    1.82 
   3   4   1   52.59    1.84 
   4  -4   1    0.02    0.08 
   4  -4   1    0.03    0.07 
   4  -4   1    0.08    0.07 
   4  -4   1    0.12    0.09 
   4  -4   1    0.00    0.05 
  -4  -4  -1   -0.03    0.09 
  -4  -4  -1    0.06    0.09 
  -4  -4  -1   -0.05    0.06 
   4   4   1    0.23    0.12 
   4   4   1   -0.03    0.07 
  -4   4  -1    0.01    0.06 
  -4   4  -1    0.08    0.07 
   4   4   1    0.06    0.09 
   5  -4   1    3.44    0.29 
   5  -4   1    3.62    0.38 
   5  -4   1    4.23    0.31 
   5  -4   1    4.40    0.44 
  -5  -4  -1    4.80    0.46 
  -5  -4  -1    3.25    0.40 
  -5  -4  -1    4.00    0.46 
   5   4   1    3.75    0.42 
  -5   4  -1    4.34    0.29 
   5   4   1    3.41    0.41 
   5   4   1    3.35    0.43 
  -5   4  -1    3.88    0.29 
   6  -4   1    0.08    0.10 
  -6  -4  -1    0.13    0.14 
   6  -4   1   -0.08    0.09 
   6  -4   1    0.23    0.12 
  -6  -4  -1    0.14    0.14 
  -6  -4  -1    0.20    0.17 
   6   4   1    0.05    0.13 
  -6   4  -1    0.14    0.11 
  -6   4  -1    0.52    0.16 
   6   4   1    0.08    0.12 
   6   4   1    0.17    0.16 
   7  -4   1   16.99    0.83 
  -7  -4  -1   16.23    0.89 
  -7  -4  -1   17.02    0.94 
   7  -4   1   17.27    0.84 
   7  -4   1   17.29    0.91 
   7   4   1   16.97    0.95 
   7   4   1   15.43    0.90 
  -7   4  -1   16.56    0.82 
   7   4   1   16.20    0.96 
  -7   4  -1   17.34    0.79 
   8  -4   1    2.64    0.37 
   8  -4   1    2.51    0.37 
  -8  -4  -1    2.90    0.46 
  -8  -4  -1    3.13    0.46 
   8  -4   1    3.37    0.49 
   8   4   1    3.10    0.47 
  -8   4  -1    3.58    0.40 
   8   4   1    2.39    0.44 
   8   4   1    2.18    0.43 
   9  -4   1    2.34    0.39 
  -9  -4  -1    3.17    0.48 
  -9  -4  -1    2.43    0.47 
   9  -4   1    2.76    0.41 
   9   4   1    3.15    0.55 
   9   4   1    2.39    0.47 
  -9   4  -1    2.01    0.32 
   9   4   1    2.40    0.45 
 -10  -4  -1    6.93    0.74 
  10  -4   1    9.76    0.69 
 -10  -4  -1    7.34    0.81 
  10  -4   1    7.86    0.76 
  10   4   1    6.56    0.81 
  10   4   1    9.01    0.71 
 -11  -4  -1    2.80    0.49 
  11  -4   1    3.03    0.50 
  11  -4   1    2.84    0.46 
  11   4   1    2.09    0.48 
  11   4   1    2.68    0.57 
 -12  -5   1    0.17    0.23 
  12  -5  -1    0.02    0.18 
  12   5  -1   -0.07    0.19 
  11  -5  -1    2.49    0.45 
  11  -5  -1    4.25    0.56 
 -11  -5   1    3.10    0.55 
 -11  -5   1    3.99    0.56 
  11   5  -1    3.76    0.57 
  11   5  -1    3.89    0.72 
 -10  -5   1    0.28    0.24 
  10  -5  -1    0.01    0.15 
  10  -5  -1    0.17    0.16 
 -10  -5   1    0.06    0.15 
  10   5  -1    0.00    0.20 
  10   5  -1    0.09    0.16 
  -9  -5   1    0.47    0.23 
   9  -5  -1    0.44    0.20 
  -9  -5   1    0.41    0.22 
   9  -5  -1    0.08    0.15 
   9   5  -1    0.31    0.19 
   9   5  -1    0.49    0.26 
  -8  -5   1    0.01    0.16 
   8  -5  -1    0.08    0.11 
  -8  -5   1    0.14    0.15 
   8  -5  -1    0.08    0.12 
   8   5  -1   -0.20    0.14 
   8   5  -1    0.01    0.13 
   8   5  -1    0.19    0.20 
  -8   5   1   -0.15    0.12 
  -7  -5   1    4.85    0.51 
   7  -5  -1    4.69    0.38 
   7  -5  -1    4.82    0.39 
   7  -5  -1    4.55    0.43 
  -7  -5   1    3.89    0.52 
  -7  -5   1    5.38    0.57 
  -7   5   1    4.17    0.45 
   7   5  -1    4.37    0.54 
   7   5  -1    4.93    0.56 
   7   5  -1    4.39    0.48 
  -7   5   1    4.48    0.33 
   6  -5  -1    2.60    0.30 
   6  -5  -1    1.98    0.26 
  -6  -5   1    1.89    0.32 
   6  -5  -1    1.53    0.25 
  -6  -5   1    2.17    0.33 
  -6  -5   1    2.21    0.37 
  -6   5   1    2.47    0.26 
  -6   5   1    1.90    0.28 
   6   5  -1    1.40    0.30 
   6   5  -1    1.75    0.29 
   6   5  -1    1.61    0.29 
   5  -5  -1    0.09    0.08 
   5  -5  -1    0.25    0.09 
  -5  -5   1    0.29    0.14 
  -5  -5   1    0.07    0.10 
   5  -5  -1    0.19    0.10 
  -5  -5   1    0.25    0.13 
   5   5  -1    0.15    0.13 
  -5   5   1    0.11    0.10 
  -5   5   1    0.36    0.13 
   5   5  -1    0.31    0.14 
   5   5  -1    0.00    0.11 
  -5   5   1    0.33    0.10 
   4  -5  -1   42.11    1.43 
   4  -5  -1   42.47    1.48 
  -4  -5   1   41.98    1.51 
   4  -5  -1   42.40    1.47 
  -4  -5   1   43.89    1.58 
  -4  -5   1   41.80    1.56 
   4  -5  -1   42.01    1.42 
  -4   5   1   42.76    1.45 
   4   5  -1   41.77    1.55 
   4   5  -1   41.47    1.59 
  -4   5   1   42.83    1.44 
   4   5  -1   42.61    1.52 
   3  -5  -1    5.06    0.29 
  -3  -5   1    4.94    0.32 
  -3  -5   1    5.53    0.37 
   3  -5  -1    5.64    0.29 
   3  -5  -1    5.04    0.31 
   3  -5  -1    5.40    0.27 
  -3  -5   1    5.18    0.35 
   3   5  -1    5.31    0.35 
   3   5  -1    5.12    0.37 
   3   5  -1    5.01    0.32 
  -3   5   1    5.81    0.30 
  -2  -5   1  113.25    3.29 
   2  -5  -1  112.65    3.30 
   2  -5  -1  112.10    3.32 
  -2  -5   1  109.78    3.37 
  -2  -5   1  110.49    3.42 
   2  -5  -1  109.88    3.32 
   2  -5  -1  111.84    3.38 
  -2  -5   1  109.75    3.41 
   2   5  -1  108.85    3.41 
  -2   5   1  109.22    3.32 
   2   5  -1  108.69    3.44 
   2   5  -1  108.47    3.37 
  -1  -5   1   14.86    0.57 
   1  -5  -1   14.64    0.53 
  -1  -5   1   15.10    0.58 
   1  -5  -1   14.78    0.52 
   1  -5  -1   15.26    0.54 
  -1  -5   1   15.37    0.55 
  -1  -5   1   15.23    0.55 
  -1  -5   1   14.62    0.58 
   1  -5  -1   15.18    0.58 
   1   5  -1   14.76    0.54 
   1   5  -1   15.47    0.60 
  -1   5   1   15.36    0.56 
   0  -5   1   16.38    0.55 
   0  -5   1   16.19    0.55 
   0  -5   1   15.10    0.55 
   0  -5  -1   15.76    0.61 
   0  -5  -1   17.33    0.60 
   0  -5   1   16.67    0.54 
   0  -5   1   15.53    0.61 
   0  -5  -1   17.53    0.62 
   0  -5   1   16.09    0.56 
   0  -5  -1   17.82    0.64 
   0   5  -1   17.02    0.61 
   0   5  -1   16.39    0.51 
   0   5   1   17.54    0.64 
   0   5   1   16.62    0.65 
   1  -5   1  105.73    3.15 
   1  -5   1  108.04    3.16 
   1  -5   1  110.24    3.31 
  -1  -5  -1  110.32    3.35 
   1  -5   1  108.21    3.16 
  -1  -5  -1  106.26    3.24 
   1  -5   1  107.86    3.17 
  -1  -5  -1  107.16    3.35 
   1   5   1  107.36    3.34 
   1   5   1  107.75    3.36 
   1   5   1  113.06    3.37 
   1   5   1  105.12    3.34 
   2  -5   1  106.48    3.17 
   2  -5   1  108.79    3.29 
   2  -5   1  104.60    3.14 
  -2  -5  -1  105.42    3.36 
  -2  -5  -1  104.78    3.34 
   2  -5   1  103.89    3.15 
   2   5   1  106.91    3.36 
   2   5   1  104.08    3.35 
   2   5   1  105.57    3.33 
  -2   5  -1  107.82    3.13 
  -3  -5  -1    7.71    0.47 
  -3  -5  -1    6.06    0.43 
   3  -5   1    6.36    0.32 
   3  -5   1    7.01    0.39 
   3  -5   1    7.20    0.32 
   3  -5   1    6.71    0.35 
  -3  -5  -1    6.32    0.40 
  -3   5  -1    6.93    0.30 
   3   5   1    6.30    0.43 
  -3   5  -1    6.69    0.30 
   3   5   1    6.98    0.44 
   3   5   1    6.12    0.43 
  -4  -5  -1    0.94    0.23 
   4  -5   1    0.69    0.14 
   4  -5   1    0.58    0.12 
   4  -5   1    0.82    0.16 
  -4  -5  -1    0.60    0.17 
  -4  -5  -1    0.35    0.15 
   4  -5   1    0.38    0.12 
   4   5   1    0.57    0.17 
  -4   5  -1    0.63    0.12 
   4   5   1    0.64    0.19 
   4   5   1    0.65    0.18 
  -4   5  -1    0.50    0.11 
   5  -5   1    5.30    0.36 
  -5  -5  -1    6.78    0.49 
   5  -5   1    6.23    0.38 
  -5  -5  -1    4.88    0.49 
   5  -5   1    6.21    0.44 
  -5  -5  -1    5.75    0.47 
   5  -5   1    5.57    0.39 
  -5   5  -1    5.56    0.35 
   5   5   1    6.19    0.47 
   5   5   1    6.07    0.48 
   5   5   1    5.71    0.47 
  -5   5  -1    5.78    0.34 
   6  -5   1    4.87    0.36 
  -6  -5  -1    4.66    0.53 
   6  -5   1    4.45    0.35 
  -6  -5  -1    4.63    0.53 
  -6  -5  -1    4.86    0.56 
  -6   5  -1    4.29    0.34 
  -6   5  -1    4.53    0.32 
   6   5   1    4.99    0.53 
   6   5   1    5.59    0.60 
   6   5   1    5.36    0.58 
  -7  -5  -1   23.13    1.11 
   7  -5   1   21.22    0.98 
   7  -5   1   20.87    0.97 
  -7  -5  -1   20.46    1.11 
  -7   5  -1   21.59    0.92 
  -7   5  -1   22.90    0.99 
   7   5   1   22.45    1.14 
   7   5   1   23.10    1.19 
   7   5   1   22.87    1.12 
   8  -5   1    0.42    0.17 
  -8  -5  -1    0.28    0.19 
   8  -5   1    0.36    0.18 
  -8  -5  -1    0.17    0.19 
   8   5   1    0.22    0.17 
   8   5   1    0.20    0.19 
   8   5   1    0.15    0.21 
  -8   5  -1    0.24    0.15 
   9  -5   1    1.48    0.32 
   9  -5   1    1.86    0.34 
  -9  -5  -1    1.72    0.40 
  -9  -5  -1    1.89    0.38 
   9   5   1    1.78    0.40 
   9   5   1    2.00    0.39 
   9   5   1    2.05    0.47 
 -10  -5  -1    1.46    0.38 
  10  -5   1    1.70    0.35 
  10  -5   1    2.11    0.39 
 -10  -5  -1    1.60    0.39 
  10   5   1    1.65    0.45 
  10   5   1    1.93    0.43 
 -11  -5  -1    8.89    0.87 
  11  -5   1    8.35    0.68 
 -11  -5  -1    7.56    0.91 
  11  -5   1    6.60    0.73 
  11   5   1    9.80    1.08 
  11   5   1    7.85    0.83 
  11  -6  -1    0.20    0.21 
 -11  -6   1    0.27    0.23 
  11  -6  -1    0.32    0.20 
 -11  -6   1    0.73    0.32 
  11   6  -1    0.86    0.41 
  11   6  -1    0.43    0.26 
 -10  -6   1    0.53    0.28 
  10  -6  -1   -0.15    0.12 
 -10  -6   1   -0.07    0.15 
  10  -6  -1    0.13    0.17 
  10   6  -1   -0.09    0.23 
  10   6  -1    0.23    0.18 
  -9  -6   1    0.73    0.25 
  -9  -6   1    0.74    0.28 
   9  -6  -1    0.47    0.20 
   9  -6  -1    0.74    0.22 
   9   6  -1    0.61    0.24 
   9   6  -1    0.73    0.31 
  -8  -6   1   15.50    0.89 
   8  -6  -1   16.43    0.84 
   8  -6  -1   17.43    0.84 
  -8  -6   1   16.02    0.96 
   8   6  -1   14.98    0.99 
   8   6  -1   16.02    0.90 
  -7  -6   1   -0.07    0.11 
  -7  -6   1   -0.12    0.11 
   7  -6  -1    0.05    0.11 
   7  -6  -1   -0.02    0.10 
  -7  -6   1    0.19    0.15 
   7  -6  -1    0.10    0.11 
   7   6  -1   -0.08    0.14 
  -7   6   1    0.12    0.12 
   7   6  -1   -0.19    0.12 
   7   6  -1   -0.11    0.11 
   6  -6  -1    2.76    0.32 
  -6  -6   1    2.67    0.36 
   6  -6  -1    2.18    0.26 
   6  -6  -1    2.32    0.30 
  -6  -6   1    2.44    0.37 
  -6  -6   1    3.02    0.43 
   6   6  -1    2.81    0.38 
   6   6  -1    2.16    0.34 
  -6   6   1    2.39    0.30 
   6   6  -1    2.43    0.40 
  -5  -6   1    2.29    0.31 
   5  -6  -1    2.34    0.25 
   5  -6  -1    2.68    0.28 
   5  -6  -1    2.49    0.31 
  -5  -6   1    2.86    0.37 
  -5  -6   1    2.51    0.36 
   5  -6  -1    1.93    0.26 
   5   6  -1    2.61    0.37 
   5   6  -1    2.18    0.31 
   5   6  -1    2.20    0.35 
  -5   6   1    3.02    0.30 
  -5   6   1    2.26    0.27 
   4  -6  -1    2.98    0.31 
   4  -6  -1    3.92    0.26 
   4  -6  -1    3.80    0.29 
  -4  -6   1    4.69    0.46 
  -4  -6   1    3.85    0.31 
  -4  -6   1    4.68    0.47 
   4  -6  -1    3.87    0.25 
   4   6  -1    4.20    0.43 
   4   6  -1    3.40    0.35 
  -4   6   1    3.99    0.27 
   4   6  -1    3.93    0.45 
  -3  -6   1   55.30    1.84 
   3  -6  -1   53.54    1.74 
   3  -6  -1   56.44    1.74 
  -3  -6   1   54.99    1.68 
  -3  -6   1   54.87    1.89 
  -3  -6   1   55.87    1.90 
   3  -6  -1   55.19    1.83 
   3  -6  -1   53.27    1.77 
   3   6  -1   53.29    1.87 
  -3   6   1   54.49    1.76 
   3   6  -1   57.23    1.94 
   3   6  -1   54.58    1.84 
  -2  -6   1    0.13    0.07 
  -2  -6   1    0.25    0.11 
   2  -6  -1    0.04    0.07 
  -2  -6   1    0.09    0.09 
   2  -6  -1    0.33    0.07 
   2  -6  -1    0.24    0.07 
  -2  -6   1    0.21    0.07 
   2  -6  -1    0.16    0.06 
   2   6  -1    0.54    0.15 
  -2   6   1    0.14    0.07 
   2   6  -1    0.06    0.07 
   2   6  -1    0.12    0.08 
  -1  -6   1   83.41    2.63 
  -1  -6   1   84.10    2.65 
  -1  -6   1   87.07    2.62 
   1  -6  -1   84.40    2.58 
   1  -6  -1   81.45    2.57 
  -1  -6   1   87.29    2.60 
   1  -6  -1   85.12    2.65 
  -1  -6   1   84.59    2.64 
   1  -6  -1   83.99    2.60 
   1   6  -1   87.45    2.68 
  -1   6   1   86.10    2.62 
   1   6  -1   88.00    2.59 
  -1   6   1   85.37    2.65 
   0  -6   1  184.90    5.48 
   0  -6   1  189.72    5.50 
   0  -6   1  185.85    5.57 
   0  -6   1  185.32    5.49 
   0  -6  -1  183.94    5.56 
   0  -6  -1  192.44    5.56 
   0  -6   1  187.07    5.46 
   0  -6  -1  190.23    5.55 
   0  -6   1  188.31    5.50 
   0  -6   1  186.88    5.49 
   0  -6  -1  187.13    5.59 
   0   6   1  185.55    5.58 
   0   6  -1  185.66    5.56 
   0   6   1  182.13    5.61 
   0   6  -1  184.23    5.44 
   1  -6   1    0.05    0.03 
  -1  -6  -1    0.10    0.08 
   1  -6   1    0.12    0.03 
  -1  -6  -1    0.11    0.08 
   1  -6   1    0.10    0.03 
   1  -6   1    0.12    0.03 
  -1  -6  -1    0.08    0.05 
   1  -6   1    0.09    0.07 
   1   6   1    0.03    0.07 
   1   6   1    0.05    0.07 
   1   6   1    0.13    0.08 
  -1   6  -1    0.10    0.05 
   1   6   1    0.12    0.08 
  -2  -6  -1    3.83    0.32 
   2  -6   1    4.71    0.21 
   2  -6   1    4.45    0.29 
   2  -6   1    4.10    0.19 
  -2  -6  -1    4.42    0.22 
  -2  -6  -1    3.97    0.31 
   2  -6   1    4.19    0.19 
   2  -6   1    4.84    0.23 
   2   6   1    4.17    0.33 
  -2   6  -1    4.20    0.16 
   2   6   1    4.16    0.32 
   2   6   1    3.69    0.31 
  -2   6  -1    4.23    0.18 
  -3  -6  -1   14.12    0.71 
  -3  -6  -1   16.26    0.57 
   3  -6   1   16.04    0.63 
  -3  -6  -1   15.68    0.77 
  -3  -6  -1   16.72    0.79 
   3  -6   1   16.06    0.59 
   3  -6   1   17.17    0.61 
   3  -6   1   16.93    0.72 
  -3   6  -1   15.71    0.56 
   3   6   1   15.95    0.78 
   3   6   1   16.14    0.78 
  -3   6  -1   16.36    0.58 
   3   6   1   16.62    0.77 
  -4  -6  -1    6.19    0.44 
   4  -6   1    6.67    0.35 
   4  -6   1    6.22    0.41 
  -4  -6  -1    6.21    0.47 
   4  -6   1    5.81    0.38 
  -4  -6  -1    6.65    0.49 
   4  -6   1    6.33    0.34 
  -4  -6  -1    6.61    0.27 
   4   6   1    6.78    0.47 
   4   6   1    6.86    0.49 
  -4   6  -1    6.23    0.31 
   4   6   1    6.59    0.49 
  -4   6  -1    6.72    0.34 
   5  -6   1    5.68    0.41 
  -5  -6  -1    5.80    0.24 
   5  -6   1    6.08    0.37 
  -5  -6  -1    5.53    0.45 
   5  -6   1    5.58    0.42 
  -5  -6  -1    6.08    0.49 
  -5  -6  -1    6.10    0.59 
   5  -6   1    6.39    0.37 
   5   6   1    6.96    0.54 
  -5   6  -1    6.20    0.36 
   5   6   1    6.18    0.48 
  -5   6  -1    6.54    0.34 
   5   6   1    6.34    0.50 
  -6  -6  -1    0.22    0.16 
   6  -6   1    0.43    0.15 
  -6  -6  -1    0.41    0.18 
  -6  -6  -1    0.02    0.13 
   6  -6   1    0.13    0.11 
   6  -6   1    0.26    0.12 
  -6   6  -1    0.18    0.11 
  -6   6  -1    0.30    0.11 
   6   6   1    0.11    0.14 
   6   6   1    0.27    0.17 
   6   6   1    0.36    0.18 
   7  -6   1    1.21    0.24 
  -7  -6  -1    1.00    0.29 
   7  -6   1    1.34    0.26 
  -7  -6  -1    1.25    0.32 
  -7  -6  -1    1.08    0.31 
   7   6   1    0.76    0.28 
  -7   6  -1    1.16    0.22 
   7   6   1    0.73    0.25 
   7   6   1    1.03    0.31 
  -8  -6  -1    1.32    0.32 
   8  -6   1    1.49    0.29 
   8  -6   1    2.21    0.33 
  -8  -6  -1    2.63    0.46 
   8   6   1    2.62    0.48 
   8   6   1    2.43    0.42 
   8   6   1    2.37    0.47 
  -8   6  -1    2.55    0.36 
  -9  -6  -1   -0.13    0.15 
  -9  -6  -1   -0.07    0.16 
   9  -6   1   -0.14    0.10 
   9  -6   1   -0.05    0.12 
   9   6   1   -0.14    0.14 
   9   6   1   -0.07    0.16 
 -10  -6  -1    1.12    0.36 
  10  -6   1    0.69    0.25 
  10  -6   1    0.88    0.27 
 -10  -6  -1    0.32    0.22 
  10   6   1    1.37    0.37 
  10   6   1    0.64    0.33 
 -11  -6  -1   -0.01    0.23 
  11  -6   1    0.37    0.21 
 -11  -6  -1    0.16    0.24 
  11  -6   1    0.03    0.16 
  11   6   1    0.42    0.33 
  11   6   1    0.30    0.26 
  11  -7  -1    8.07    0.64 
  11  -7  -1    6.32    0.69 
 -11  -7   1    7.43    0.91 
 -11  -7   1    8.36    0.83 
  11   7  -1    8.28    0.86 
  11   7  -1    6.76    0.90 
 -10  -7   1    0.14    0.20 
  10  -7  -1    0.08    0.17 
  10  -7  -1   -0.01    0.14 
 -10  -7   1    0.12    0.21 
  10   7  -1   -0.13    0.12 
  10   7  -1    0.08    0.22 
   9  -7  -1    5.53    0.57 
   9  -7  -1    6.79    0.52 
  -9  -7   1    6.29    0.73 
  -9  -7   1    7.34    0.72 
   9   7  -1    7.03    0.82 
   9   7  -1    6.75    0.70 
   8  -7  -1    0.13    0.12 
  -8  -7   1   -0.11    0.13 
   8  -7  -1   -0.04    0.11 
  -8  -7   1   -0.06    0.13 
   8   7  -1   -0.15    0.16 
   8   7  -1   -0.02    0.14 
   7  -7  -1    0.78    0.19 
   7  -7  -1    0.90    0.20 
  -7  -7   1    0.85    0.23 
   7  -7  -1    0.99    0.23 
  -7  -7   1    0.84    0.27 
  -7  -7   1    0.62    0.23 
  -7   7   1    0.76    0.19 
   7   7  -1    1.02    0.29 
   7   7  -1    0.79    0.24 
  -6  -7   1   28.86    1.22 
  -6  -7   1   30.29    1.31 
   6  -7  -1   28.63    1.17 
  -6  -7   1   27.49    1.28 
   6  -7  -1   27.87    1.11 
   6  -7  -1   26.02    1.08 
   6   7  -1   29.33    1.35 
  -6   7   1   25.92    1.10 
   6   7  -1   30.32    1.24 
   6   7  -1   29.90    1.30 
  -5  -7   1    9.01    0.60 
   5  -7  -1    8.76    0.47 
  -5  -7   1    9.77    0.62 
   5  -7  -1    8.65    0.52 
   5  -7  -1    9.94    0.55 
  -5  -7   1    9.11    0.56 
   5  -7  -1   10.10    0.48 
   5   7  -1    9.53    0.60 
  -5   7   1    8.62    0.48 
   5   7  -1    9.39    0.57 
   5   7  -1    9.68    0.64 
   4  -7  -1    1.12    0.20 
  -4  -7   1    0.72    0.17 
  -4  -7   1    0.95    0.23 
   4  -7  -1    0.92    0.17 
   4  -7  -1    0.58    0.12 
   4  -7  -1    1.09    0.16 
  -4  -7   1    0.88    0.22 
   4   7  -1    0.61    0.19 
   4   7  -1    0.97    0.20 
   4   7  -1    1.12    0.21 
  -4   7   1    1.03    0.17 
   3  -7  -1    0.73    0.13 
  -3  -7   1    0.26    0.12 
  -3  -7   1    0.55    0.14 
  -3  -7   1    0.59    0.16 
   3  -7  -1    1.00    0.14 
   3  -7  -1    0.62    0.14 
  -3  -7   1    0.57    0.09 
   3  -7  -1    0.67    0.11 
  -3   7   1    0.57    0.11 
   3   7  -1    0.77    0.18 
   3   7  -1    0.82    0.19 
   2  -7  -1    9.46    0.39 
  -2  -7   1    9.48    0.48 
  -2  -7   1    8.57    0.48 
   2  -7  -1    8.75    0.38 
  -2  -7   1    8.95    0.39 
  -2  -7   1    9.26    0.47 
   2  -7  -1    8.91    0.37 
   2  -7  -1    8.67    0.45 
  -2  -7   1    9.40    0.44 
   2   7  -1    9.16    0.47 
   2   7  -1    8.98    0.43 
  -2   7   1    9.70    0.41 
   2   7  -1    8.76    0.49 
  -1  -7   1    6.62    0.33 
   1  -7  -1    6.03    0.34 
  -1  -7   1    6.33    0.35 
  -1  -7   1    6.22    0.30 
  -1  -7   1    6.73    0.34 
  -1  -7   1    6.48    0.34 
   1  -7  -1    6.08    0.29 
   1  -7  -1    6.49    0.29 
   1  -7  -1    6.51    0.32 
  -1   7   1    6.73    0.33 
   1   7  -1    6.26    0.37 
  -1   7   1    6.09    0.35 
   1   7  -1    6.42    0.30 
   0  -7  -1   40.86    1.40 
   0  -7   1   41.34    1.27 
   0  -7  -1   40.22    1.36 
   0  -7   1   40.53    1.38 
   0  -7  -1   41.38    1.37 
   0  -7   1   41.81    1.32 
   0  -7   1   39.62    1.31 
   0  -7   1   41.65    1.31 
   0  -7  -1   42.48    1.38 
   0  -7   1   40.10    1.30 
   0   7  -1   40.23    1.25 
   0   7   1   40.65    1.43 
   0   7   1   40.85    1.39 
   0   7  -1   43.36    1.39 
  -1  -7  -1  116.56    3.58 
  -1  -7  -1  122.14    3.71 
   1  -7   1  115.68    3.47 
   1  -7   1  116.56    3.46 
   1  -7   1  118.85    3.50 
  -1  -7  -1  117.83    3.68 
   1  -7   1  121.68    3.66 
   1  -7   1  117.36    3.50 
   1   7   1  115.67    3.67 
  -1   7  -1  119.58    3.58 
   1   7   1  117.18    3.71 
   1   7   1  118.79    3.68 
   1   7   1  118.66    3.70 
   2  -7   1  124.92    3.75 
  -2  -7  -1  126.78    3.80 
   2  -7   1  125.49    3.73 
   2  -7   1  123.44    3.92 
  -2  -7  -1  127.65    4.00 
  -2  -7  -1  125.77    4.02 
   2  -7   1  126.53    3.75 
   2  -7   1  127.15    3.73 
   2   7   1  129.57    4.02 
   2   7   1  126.90    3.97 
  -2   7  -1  127.31    3.73 
   2   7   1  126.64    4.00 
  -3  -7  -1   13.03    0.68 
  -3  -7  -1   12.29    0.47 
   3  -7   1   12.00    0.47 
   3  -7   1   11.95    0.50 
  -3  -7  -1   11.87    0.62 
   3  -7   1   11.96    0.47 
   3  -7   1   12.31    0.61 
   3   7   1   12.17    0.64 
  -3   7  -1   12.02    0.45 
   3   7   1   11.76    0.66 
   3   7   1   11.94    0.66 
  -3   7  -1   12.43    0.42 
  -4  -7  -1    8.35    0.56 
  -4  -7  -1    8.10    0.33 
   4  -7   1    7.44    0.47 
   4  -7   1    7.35    0.42 
  -4  -7  -1    8.58    0.57 
   4  -7   1    7.34    0.37 
  -4  -7  -1    7.00    0.49 
   4  -7   1    7.41    0.38 
   4   7   1    8.02    0.53 
   4   7   1    7.06    0.53 
  -4   7  -1    9.18    0.39 
  -4   7  -1    8.14    0.34 
   4   7   1    7.55    0.54 
  -5  -7  -1    7.02    0.28 
   5  -7   1    7.38    0.47 
   5  -7   1    7.40    0.40 
  -5  -7  -1    6.97    0.51 
   5  -7   1    6.48    0.38 
   5  -7   1    7.89    0.49 
  -5  -7  -1    6.22    0.51 
  -5  -7  -1    6.73    0.54 
  -5   7  -1    7.00    0.38 
   5   7   1    6.53    0.55 
  -5   7  -1    6.63    0.34 
   5   7   1    7.67    0.54 
   5   7   1    6.74    0.54 
   6  -7   1    4.72    0.35 
   6  -7   1    4.60    0.35 
  -6  -7  -1    3.90    0.48 
  -6  -7  -1    4.64    0.54 
   6  -7   1    4.58    0.47 
  -6  -7  -1    6.34    0.66 
  -6   7  -1    5.27    0.32 
  -6   7  -1    3.96    0.32 
   6   7   1    4.83    0.55 
   6   7   1    5.45    0.64 
   6   7   1    5.45    0.62 
   7  -7   1    4.37    0.43 
  -7  -7  -1    4.70    0.57 
  -7  -7  -1    3.99    0.57 
   7  -7   1    4.65    0.38 
  -7  -7  -1    4.67    0.61 
   7   7   1    4.45    0.61 
  -7   7  -1    4.76    0.33 
   7   7   1    6.13    0.65 
   7   7   1    6.46    0.72 
   8  -7   1    0.84    0.21 
  -8  -7  -1    1.12    0.33 
   8  -7   1    1.15    0.26 
  -8  -7  -1    0.78    0.26 
   8   7   1    0.87    0.32 
   8   7   1    1.08    0.30 
  -9  -7  -1    2.83    0.52 
   9  -7   1    3.47    0.43 
  -9  -7  -1    3.26    0.52 
   9  -7   1    3.13    0.43 
   9   7   1    3.16    0.57 
   9   7   1    4.06    0.56 
  10  -7   1    2.95    0.43 
 -10  -7  -1    2.22    0.48 
 -10  -7  -1    2.60    0.50 
  10  -7   1    2.82    0.44 
  10   7   1    3.73    0.58 
  10   7   1    2.88    0.59 
  11  -7   1   11.93    0.82 
 -11  -7  -1   12.04    0.89 
 -11  -7  -1   12.91    1.02 
  11  -7   1   13.77    0.86 
  11   7   1   12.69    1.25 
  11   7   1   12.00    0.92 
 -11  -8   1    1.66    0.45 
  11  -8  -1    1.83    0.37 
  11  -8  -1    1.73    0.36 
 -11  -8   1    2.38    0.47 
  11   8  -1    3.02    0.65 
  11   8  -1    1.64    0.41 
 -10  -8   1    1.74    0.39 
 -10  -8   1    1.16    0.37 
  10  -8  -1    2.66    0.41 
  10  -8  -1    1.49    0.32 
  10   8  -1    2.48    0.45 
  10   8  -1    1.45    0.44 
   9  -8  -1   -0.07    0.09 
  -9  -8   1   -0.12    0.16 
   9  -8  -1    0.08    0.13 
  -9  -8   1   -0.03    0.21 
   9   8  -1    0.35    0.27 
   9   8  -1    0.11    0.17 
  -8  -8   1    1.05    0.28 
   8  -8  -1    1.06    0.27 
   8  -8  -1    0.47    0.17 
   8  -8  -1    1.22    0.25 
  -8  -8   1    0.83    0.29 
   8   8  -1    0.81    0.27 
   8   8  -1    0.83    0.31 
   7  -8  -1    0.11    0.14 
   7  -8  -1    0.19    0.13 
   7  -8  -1   -0.07    0.08 
  -7  -8   1    0.02    0.17 
  -7  -8   1   -0.15    0.13 
  -7  -8   1   -0.08    0.12 
   7   8  -1    0.04    0.14 
   7   8  -1    0.11    0.16 
  -6  -8   1    3.22    0.45 
   6  -8  -1    3.77    0.36 
   6  -8  -1    3.90    0.42 
  -6  -8   1    3.96    0.46 
   6  -8  -1    2.93    0.33 
  -6  -8   1    2.94    0.43 
   6   8  -1    2.90    0.46 
   6   8  -1    3.46    0.45 
  -6   8   1    4.18    0.40 
   6   8  -1    3.34    0.42 
   5  -8  -1    0.26    0.10 
   5  -8  -1    0.44    0.12 
  -5  -8   1    0.22    0.14 
  -5  -8   1    0.02    0.12 
   5  -8  -1    0.26    0.14 
   5  -8  -1    0.29    0.13 
  -5  -8   1    0.41    0.17 
   5   8  -1    0.20    0.14 
   5   8  -1    0.19    0.12 
   5   8  -1    0.32    0.15 
  -5   8   1    0.41    0.12 
   4  -8  -1   22.26    0.84 
   4  -8  -1   22.01    0.88 
  -4  -8   1   23.20    1.03 
  -4  -8   1   22.07    0.75 
  -4  -8   1   22.47    1.01 
   4  -8  -1   21.00    0.82 
   4  -8  -1   21.72    0.94 
  -4  -8   1   24.62    0.97 
   4   8  -1   24.80    1.08 
  -4   8   1   21.77    0.84 
   4   8  -1   21.03    0.98 
   4   8  -1   22.18    0.95 
   3  -8  -1  105.35    3.26 
  -3  -8   1  103.54    3.44 
  -3  -8   1  105.27    3.43 
  -3  -8   1  107.11    3.37 
  -3  -8   1  107.43    3.23 
   3  -8  -1  106.42    3.27 
   3  -8  -1  107.47    3.25 
   3  -8  -1  108.70    3.40 
   3   8  -1  106.21    3.37 
   3   8  -1  107.31    3.49 
   3   8  -1  107.02    3.43 
  -3   8   1  108.53    3.28 
   2  -8  -1    0.26    0.10 
   2  -8  -1    0.07    0.04 
  -2  -8   1   -0.04    0.05 
  -2  -8   1    0.07    0.08 
   2  -8  -1    0.10    0.05 
   2  -8  -1    0.08    0.05 
  -2  -8   1    0.00    0.05 
  -2  -8   1    0.07    0.08 
  -2  -8   1    0.06    0.07 
  -2   8   1    0.12    0.07 
   2   8  -1    0.03    0.08 
   2   8  -1    0.02    0.07 
  -1  -8   1   69.09    2.23 
  -1  -8   1   67.56    2.25 
   1  -8  -1   70.49    2.22 
   1  -8  -1   69.27    2.17 
  -1  -8   1   68.71    2.24 
   1  -8  -1   72.21    2.27 
   1  -8  -1   69.61    2.16 
  -1  -8   1   70.88    2.26 
  -1  -8   1   71.21    2.23 
  -1  -8   1   68.65    2.17 
   1   8  -1   68.85    2.29 
  -1   8   1   70.02    2.22 
  -1   8   1   71.46    2.28 
   1   8  -1   70.15    2.17 
   0  -8   1   28.24    0.95 
   0  -8   1   28.65    0.95 
   0  -8   1   29.81    1.01 
   0  -8  -1   28.47    1.02 
   0  -8   1   28.17    0.96 
   0  -8  -1   27.94    1.04 
   0  -8  -1   27.60    1.01 
   0  -8   1   28.14    0.90 
   0  -8  -1   27.44    1.00 
   0  -8   1   26.20    1.02 
   0   8  -1   27.44    1.02 
   0   8  -1   28.11    0.89 
   0   8   1   25.82    1.01 
   0   8   1   29.07    1.08 
   1  -8   1  187.54    5.52 
   1  -8   1  177.92    5.30 
   1  -8   1  181.53    5.35 
   1  -8   1  179.89    5.30 
  -1  -8  -1  179.67    5.55 
  -1  -8  -1  183.09    5.43 
  -1  -8  -1  179.66    5.53 
  -1  -8  -1  178.33    5.53 
   1  -8   1  183.53    5.34 
   1   8   1  181.98    5.53 
   1   8   1  182.27    5.57 
   1   8   1  178.32    5.55 
  -1   8  -1  177.06    5.43 
   1   8   1  187.40    5.53 
   2  -8   1  109.70    3.28 
   2  -8   1  108.81    3.49 
   2  -8   1  112.49    3.30 
  -2  -8  -1  110.00    3.58 
   2  -8   1  107.34    3.29 
   2  -8   1  109.42    3.27 
  -2  -8  -1  115.62    3.57 
  -2  -8  -1  109.98    3.36 
   2   8   1  112.28    3.53 
   2   8   1  109.14    3.56 
   2   8   1  110.84    3.58 
   3  -8   1    3.84    0.21 
   3  -8   1    3.47    0.23 
  -3  -8  -1    3.80    0.22 
   3  -8   1    3.56    0.20 
  -3  -8  -1    3.56    0.39 
   3  -8   1    3.40    0.36 
  -3  -8  -1    3.40    0.40 
  -3  -8  -1    3.96    0.44 
   3   8   1    3.84    0.44 
  -3   8  -1    3.60    0.20 
   3   8   1    3.71    0.40 
   3   8   1    3.72    0.42 
  -4  -8  -1    3.71    0.21 
   4  -8   1    3.43    0.33 
   4  -8   1    3.80    0.24 
  -4  -8  -1    3.43    0.43 
   4  -8   1    3.43    0.23 
  -4  -8  -1    3.52    0.44 
   4  -8   1    3.28    0.37 
  -4  -8  -1    4.50    0.48 
   4   8   1    3.56    0.43 
  -4   8  -1    3.73    0.23 
  -4   8  -1    3.69    0.19 
   4   8   1    3.83    0.43 
   4   8   1    3.70    0.46 
   5  -8   1    1.61    0.21 
  -5  -8  -1    1.20    0.12 
  -5  -8  -1    1.46    0.32 
   5  -8   1    1.31    0.23 
   5  -8   1    1.70    0.29 
  -5  -8  -1    0.74    0.25 
   5  -8   1    0.93    0.16 
  -5  -8  -1    1.08    0.25 
  -5   8  -1    1.10    0.17 
   5   8   1    0.57    0.21 
  -5   8  -1    1.29    0.15 
   5   8   1    1.09    0.30 
   5   8   1    1.34    0.30 
   6  -8   1   10.80    0.54 
   6  -8   1    9.89    0.53 
   6  -8   1   10.40    0.64 
  -6  -8  -1   10.22    0.72 
  -6  -8  -1    9.90    0.72 
  -6  -8  -1   10.70    0.70 
  -6   8  -1    9.59    0.45 
   6   8   1   10.01    0.68 
   6   8   1   10.27    0.73 
   6   8   1    9.26    0.72 
   7  -8   1   11.33    0.62 
   7  -8   1   11.96    0.63 
  -7  -8  -1   13.35    0.86 
  -7  -8  -1   10.87    0.75 
  -7  -8  -1   11.12    0.81 
   7   8   1   12.59    0.88 
   7   8   1   12.58    0.80 
  -8  -8  -1    0.06    0.16 
   8  -8   1    0.31    0.16 
  -8  -8  -1    0.22    0.20 
   8  -8   1    0.05    0.11 
   8   8   1   -0.14    0.15 
   8   8   1    0.02    0.20 
  -9  -8  -1    1.15    0.34 
   9  -8   1    0.60    0.21 
   9  -8   1    0.92    0.24 
  -9  -8  -1    0.43    0.26 
   9   8   1    0.93    0.35 
   9   8   1    0.83    0.30 
  10  -8   1    4.80    0.54 
 -10  -8  -1    5.79    0.78 
  10  -8   1    6.77    0.66 
 -10  -8  -1    5.83    0.72 
  10   8   1    5.66    0.70 
  10   8   1    7.11    0.90 
  11  -8   1    2.44    0.43 
  11  -8   1    2.08    0.40 
 -11  -8  -1    2.22    0.52 
 -11  -8  -1    2.94    0.53 
  11   8   1    2.95    0.54 
  11   8   1    1.58    0.50 
  11  -9  -1    0.08    0.18 
 -11  -9   1    0.00    0.22 
 -11  -9   1    0.09    0.18 
  11  -9  -1    0.21    0.19 
  11   9  -1    0.19    0.26 
  11   9  -1    0.23    0.22 
 -10  -9   1   -0.12    0.20 
  10  -9  -1   -0.02    0.15 
 -10  -9   1    0.19    0.20 
  10  -9  -1   -0.03    0.13 
  10   9  -1    0.02    0.22 
  10   9  -1    0.07    0.18 
  -9  -9   1    2.98    0.53 
   9  -9  -1    3.69    0.44 
   9  -9  -1    4.10    0.49 
  -9  -9   1    3.78    0.53 
   9   9  -1    5.07    0.74 
   9   9  -1    4.85    0.59 
  -8  -9   1    0.74    0.26 
  -8  -9   1    0.18    0.21 
  -8  -9   1    0.45    0.23 
   8  -9  -1    0.55    0.18 
   8  -9  -1    0.43    0.22 
   8  -9  -1    0.24    0.15 
   8   9  -1    0.31    0.21 
   8   9  -1    0.64    0.28 
   7  -9  -1    7.36    0.55 
   7  -9  -1    8.86    0.52 
   7  -9  -1    8.17    0.50 
  -7  -9   1    7.88    0.80 
  -7  -9   1    7.89    0.59 
  -7  -9   1    6.27    0.67 
   7   9  -1    6.97    0.57 
   7   9  -1    9.38    0.90 
  -6  -9   1    0.26    0.16 
   6  -9  -1    0.18    0.15 
   6  -9  -1    0.18    0.10 
  -6  -9   1    0.08    0.15 
   6  -9  -1    0.31    0.13 
  -6  -9   1    0.24    0.17 
   6   9  -1    0.25    0.17 
  -6   9   1    0.41    0.15 
   6   9  -1    0.18    0.17 
  -5  -9   1    1.42    0.26 
  -5  -9   1    1.80    0.34 
   5  -9  -1    1.21    0.19 
   5  -9  -1    1.13    0.18 
  -5  -9   1    1.03    0.25 
   5  -9  -1    0.92    0.22 
   5   9  -1    1.37    0.27 
   5   9  -1    0.99    0.24 
   5   9  -1    2.03    0.38 
  -5   9   1    1.57    0.22 
  -4  -9   1    7.47    0.47 
  -4  -9   1    7.84    0.35 
   4  -9  -1    7.74    0.38 
  -4  -9   1    8.81    0.56 
   4  -9  -1    8.01    0.40 
   4  -9  -1    7.24    0.41 
   4  -9  -1    7.25    0.47 
  -4  -9   1    6.95    0.51 
   4   9  -1    7.67    0.52 
  -4   9   1    7.30    0.40 
   4   9  -1    6.71    0.53 
   4   9  -1    7.02    0.47 
  -3  -9   1   23.64    0.82 
  -3  -9   1   22.25    0.99 
   3  -9  -1   21.97    0.83 
   3  -9  -1   22.09    0.82 
  -3  -9   1   21.94    0.97 
   3  -9  -1   22.79    0.81 
  -3  -9   1   21.00    0.90 
   3  -9  -1   22.73    0.95 
   3   9  -1   22.58    1.02 
   3   9  -1   22.73    0.92 
  -3   9   1   23.29    0.85 
   3   9  -1   22.79    0.97 
  -2  -9   1  130.73    4.12 
   2  -9  -1  132.22    3.95 
  -2  -9   1  130.31    4.10 
  -2  -9   1  132.43    4.14 
  -2  -9   1  126.74    4.02 
  -2  -9   1  132.33    4.00 
   2  -9  -1  133.33    3.98 
   2  -9  -1  132.79    3.94 
   2  -9  -1  132.95    4.10 
   2   9  -1  132.37    4.16 
  -2   9   1  127.94    3.99 
   2   9  -1  130.01    4.02 
  -1  -9   1    9.13    0.47 
   1  -9  -1    9.39    0.49 
  -1  -9   1    9.32    0.47 
  -1  -9   1    9.99    0.49 
  -1  -9   1    9.70    0.43 
  -1  -9   1   10.17    0.49 
   1  -9  -1    9.62    0.46 
   1  -9  -1   10.71    0.43 
  -1  -9   1   10.19    0.48 
   1  -9  -1    9.19    0.42 
  -1   9   1    9.21    0.46 
  -1   9   1    9.99    0.51 
   1   9  -1   10.16    0.43 
   1   9  -1    9.39    0.52 
   0  -9  -1    6.96    0.40 
   0  -9   1    6.76    0.33 
   0  -9  -1    5.72    0.36 
   0  -9   1    6.30    0.37 
   0  -9  -1    6.16    0.35 
   0  -9   1    6.42    0.33 
   0  -9   1    6.63    0.28 
   0  -9  -1    6.15    0.36 
   0  -9   1    6.24    0.31 
   0   9  -1    6.34    0.27 
   0   9   1    6.08    0.40 
   0   9   1    6.39    0.38 
   0   9  -1    6.20    0.38 
   1  -9   1   16.67    0.76 
  -1  -9  -1   16.72    0.77 
  -1  -9  -1   18.07    0.79 
   1  -9   1   17.74    0.64 
   1  -9   1   17.27    0.64 
   1  -9   1   17.90    0.61 
  -1  -9  -1   17.69    0.80 
  -1  -9  -1   18.83    0.72 
   1  -9   1   18.17    0.60 
   1   9   1   18.63    0.78 
   1   9   1   17.90    0.83 
  -1   9  -1   18.68    0.73 
   1   9   1   18.48    0.79 
  -2  -9  -1   26.89    1.06 
   2  -9   1   26.64    0.87 
  -2  -9  -1   26.26    0.96 
   2  -9   1   26.88    0.89 
   2  -9   1   27.55    0.88 
   2  -9   1   25.83    1.07 
  -2  -9  -1   28.21    1.14 
  -2  -9  -1   28.45    1.17 
   2  -9   1   26.53    0.89 
   2   9   1   27.83    1.16 
   2   9   1   27.64    1.14 
   2   9   1   28.41    1.11 
  -3  -9  -1    1.55    0.28 
   3  -9   1    2.14    0.15 
  -3  -9  -1    2.70    0.39 
  -3  -9  -1    1.94    0.30 
  -3  -9  -1    2.14    0.21 
   3  -9   1    2.20    0.15 
   3  -9   1    2.11    0.17 
   3  -9   1    2.02    0.29 
  -3   9  -1    2.37    0.16 
   3   9   1    1.83    0.32 
   3   9   1    2.42    0.34 
   3   9   1    1.90    0.32 
  -4  -9  -1   15.04    0.84 
  -4  -9  -1   15.76    0.59 
   4  -9   1   15.03    0.66 
   4  -9   1   15.79    0.61 
   4  -9   1   14.55    0.76 
   4  -9   1   15.04    0.60 
  -4  -9  -1   16.30    0.87 
  -4  -9  -1   15.61    0.80 
   4   9   1   15.03    0.85 
   4   9   1   15.63    0.85 
  -4   9  -1   15.67    0.59 
   4   9   1   16.19    0.83 
   5  -9   1   44.82    1.47 
  -5  -9  -1   44.73    1.79 
  -5  -9  -1   42.58    1.37 
   5  -9   1   40.64    1.56 
   5  -9   1   41.18    1.65 
   5  -9   1   44.60    1.47 
  -5  -9  -1   42.75    1.78 
  -5  -9  -1   42.19    1.70 
   5   9   1   43.84    1.78 
   5   9   1   43.56    1.74 
  -5   9  -1   42.63    1.36 
   5   9   1   42.48    1.79 
  -6  -9  -1   41.08    1.67 
   6  -9   1   39.38    1.59 
  -6  -9  -1   41.29    1.74 
   6  -9   1   39.64    1.42 
  -6  -9  -1   42.29    1.76 
   6  -9   1   36.85    1.40 
   6   9   1   38.07    1.70 
   6   9   1   39.46    1.76 
   6   9   1   38.54    1.66 
  -7  -9  -1    3.85    0.54 
   7  -9   1    3.86    0.39 
  -7  -9  -1    3.65    0.52 
  -7  -9  -1    3.88    0.55 
   7  -9   1    3.98    0.49 
   7  -9   1    4.38    0.35 
   7   9   1    3.31    0.52 
   7   9   1    4.88    0.60 
   8  -9   1    1.54    0.27 
  -8  -9  -1    1.55    0.39 
   8  -9   1    1.05    0.23 
  -8  -9  -1    1.53    0.40 
   8   9   1    1.80    0.38 
   8   9   1    1.68    0.41 
   9  -9   1    4.30    0.48 
  -9  -9  -1    4.59    0.63 
   9  -9   1    3.64    0.44 
  -9  -9  -1    3.52    0.60 
   9   9   1    4.08    0.65 
   9   9   1    4.44    0.62 
  10  -9   1    0.07    0.16 
 -10  -9  -1   -0.16    0.21 
  10  -9   1    0.19    0.15 
 -10  -9  -1   -0.24    0.19 
  10   9   1   -0.06    0.24 
  10   9   1    0.08    0.21 
 -11  -9  -1    6.43    0.86 
  11  -9   1    6.48    0.68 
 -11  -9  -1    6.47    0.78 
  11  -9   1    6.71    0.68 
  11   9   1    6.19    0.77 
  11   9   1    6.21    0.90 
 -11 -10   1   -0.14    0.23 
  11 -10  -1    0.09    0.20 
 -11 -10   1    0.28    0.23 
  11 -10  -1    0.18    0.18 
  11  10  -1    0.02    0.26 
  11  10  -1    0.35    0.24 
 -10 -10   1    9.80    0.77 
  10 -10  -1   10.32    0.69 
 -10 -10   1    9.61    0.98 
  10 -10  -1   10.37    0.69 
  10  10  -1    8.22    0.84 
  10  10  -1    8.78    1.01 
  -9 -10   1   -0.21    0.15 
  -9 -10   1    0.01    0.17 
   9 -10  -1   -0.14    0.10 
   9 -10  -1   -0.02    0.13 
   9  10  -1   -0.07    0.20 
   9  10  -1   -0.13    0.14 
  -8 -10   1   12.15    0.89 
  -8 -10   1   15.37    0.97 
  -8 -10   1   13.81    0.85 
   8 -10  -1   14.24    0.84 
   8 -10  -1   12.64    0.71 
   8 -10  -1   14.52    0.76 
   8  10  -1   14.54    0.87 
   8  10  -1   12.97    0.96 
  -7 -10   1   22.93    1.20 
  -7 -10   1   20.97    1.08 
   7 -10  -1   22.17    0.96 
   7 -10  -1   23.39    0.96 
  -7 -10   1   21.88    1.17 
   7 -10  -1   20.25    1.05 
   7  10  -1   21.00    1.22 
   7  10  -1   23.08    1.11 
   6 -10  -1    4.16    0.32 
  -6 -10   1    5.11    0.61 
  -6 -10   1    5.05    0.53 
  -6 -10   1    3.31    0.48 
   6 -10  -1    4.45    0.34 
   6 -10  -1    4.69    0.50 
   6  10  -1    4.11    0.47 
   6  10  -1    4.42    0.57 
  -5 -10   1   13.79    0.81 
   5 -10  -1   13.44    0.73 
   5 -10  -1   13.91    0.61 
   5 -10  -1   13.33    0.62 
  -5 -10   1   13.76    0.74 
  -5 -10   1   13.67    0.80 
   5  10  -1   13.26    0.84 
  -5  10   1   12.94    0.62 
   5  10  -1   13.56    0.73 
   4 -10  -1    0.20    0.08 
  -4 -10   1    0.03    0.12 
  -4 -10   1    0.12    0.13 
  -4 -10   1   -0.03    0.05 
   4 -10  -1    0.10    0.07 
   4 -10  -1    0.11    0.09 
  -4 -10   1    0.11    0.11 
   4 -10  -1    0.01    0.10 
   4  10  -1    0.05    0.12 
   4  10  -1   -0.03    0.11 
   4  10  -1    0.04    0.10 
  -4  10   1    0.06    0.07 
   3 -10  -1    6.18    0.34 
  -3 -10   1    6.90    0.36 
   3 -10  -1    6.56    0.35 
   3 -10  -1    6.07    0.43 
  -3 -10   1    6.41    0.41 
   3 -10  -1    6.10    0.32 
  -3 -10   1    6.32    0.45 
  -3 -10   1    7.05    0.48 
   3  10  -1    6.41    0.41 
   3  10  -1    6.90    0.49 
   3  10  -1    6.62    0.46 
  -3  10   1    6.89    0.37 
  -2 -10   1    3.73    0.36 
  -2 -10   1    3.43    0.26 
   2 -10  -1    3.39    0.35 
  -2 -10   1    3.59    0.39 
   2 -10  -1    3.71    0.23 
  -2 -10   1    3.62    0.37 
  -2 -10   1    4.11    0.28 
   2 -10  -1    3.35    0.22 
   2 -10  -1    4.05    0.26 
  -2  10   1    3.66    0.26 
   2  10  -1    3.37    0.26 
   2  10  -1    3.82    0.40 
  -2  10   1    3.48    0.29 
  -1 -10   1   25.86    0.99 
  -1 -10   1   26.36    1.00 
   1 -10  -1   24.48    1.01 
   1 -10  -1   25.84    0.91 
  -1 -10   1   26.12    1.00 
  -1 -10   1   25.93    0.99 
   1 -10  -1   27.02    0.94 
   1 -10  -1   25.53    0.98 
  -1 -10   1   26.01    0.92 
  -1  10   1   25.74    0.97 
  -1  10   1   26.48    1.05 
   1  10  -1   26.18    1.06 
   1  10  -1   24.80    0.91 
   0 -10   1    6.65    0.29 
   0 -10   1    6.94    0.41 
   0 -10   1    6.23    0.34 
   0 -10  -1    6.27    0.38 
   0 -10  -1    6.72    0.38 
   0 -10  -1    6.45    0.41 
   0 -10  -1    6.52    0.39 
   0 -10   1    6.60    0.33 
   0 -10   1    6.84    0.36 
   0  10  -1    6.20    0.28 
   0  10  -1    6.01    0.40 
   0  10   1    5.69    0.42 
   0  10   1    7.04    0.40 
   1 -10   1   22.31    0.72 
   1 -10   1   23.09    0.94 
   1 -10   1   21.14    0.75 
   1 -10   1   21.89    0.78 
  -1 -10  -1   21.07    0.91 
  -1 -10  -1   21.34    0.85 
  -1 -10  -1   22.04    0.94 
  -1 -10  -1   20.66    0.93 
   1 -10   1   22.16    0.79 
   1  10   1   21.59    0.91 
   1  10   1   22.89    0.99 
  -1  10  -1   22.19    0.88 
   1  10   1   22.02    0.92 
   2 -10   1   15.36    0.73 
   2 -10   1   15.23    0.56 
  -2 -10  -1   15.53    0.64 
   2 -10   1   14.97    0.53 
  -2 -10  -1   14.25    0.77 
  -2 -10  -1   15.16    0.70 
  -2 -10  -1   13.65    0.74 
   2 -10   1   15.27    0.53 
  -2  10  -1   14.56    0.65 
   2  10   1   15.15    0.74 
   2  10   1   15.71    0.78 
   2  10   1   15.09    0.78 
  -3 -10  -1    1.84    0.28 
   3 -10   1    1.67    0.26 
  -3 -10  -1    2.17    0.22 
   3 -10   1    1.90    0.19 
  -3 -10  -1    2.38    0.36 
   3 -10   1    1.64    0.14 
  -3 -10  -1    1.82    0.32 
   3 -10   1    1.95    0.14 
   3  10   1    2.49    0.38 
  -3  10  -1    1.89    0.14 
   3  10   1    2.64    0.39 
   3  10   1    1.83    0.29 
  -4 -10  -1    0.50    0.11 
  -4 -10  -1    0.35    0.19 
  -4 -10  -1    0.12    0.15 
   4 -10   1    0.45    0.10 
   4 -10   1    0.22    0.10 
  -4 -10  -1    0.40    0.16 
   4 -10   1    0.24    0.08 
   4 -10   1    0.32    0.15 
  -4  10  -1    0.38    0.10 
   4  10   1    0.30    0.16 
   4  10   1    0.45    0.18 
   4  10   1    0.07    0.14 
   5 -10   1    7.38    0.54 
   5 -10   1    7.02    0.38 
  -5 -10  -1    7.40    0.56 
   5 -10   1    7.09    0.46 
  -5 -10  -1    8.07    0.77 
  -5 -10  -1    8.24    0.63 
   5 -10   1    7.15    0.39 
   5  10   1    8.37    0.63 
   5  10   1    6.92    0.71 
   5  10   1    7.42    0.57 
   6 -10   1    1.17    0.19 
  -6 -10  -1    1.24    0.34 
   6 -10   1    1.25    0.20 
  -6 -10  -1    0.83    0.28 
   6 -10   1    1.45    0.30 
  -6 -10  -1    1.21    0.32 
   6  10   1    1.27    0.35 
   6  10   1    1.15    0.30 
   7 -10   1   11.22    0.58 
   7 -10   1   10.87    0.58 
  -7 -10  -1   11.28    0.76 
  -7 -10  -1    8.86    0.88 
   7 -10   1   11.05    0.72 
  -7 -10  -1    8.87    0.91 
   7  10   1   10.24    0.75 
   7  10   1    9.34    0.78 
   8 -10   1    4.25    0.43 
   8 -10   1    4.17    0.43 
  -8 -10  -1    2.91    0.52 
  -8 -10  -1    3.51    0.53 
   8  10   1    3.27    0.57 
   8  10   1    3.55    0.55 
  -9 -10  -1    0.10    0.23 
  -9 -10  -1   -0.21    0.14 
   9 -10   1    0.05    0.13 
   9 -10   1    0.05    0.12 
   9  10   1    0.25    0.27 
   9  10   1    0.03    0.18 
 -10 -10  -1    0.37    0.33 
  10 -10   1    0.81    0.25 
 -10 -10  -1    0.63    0.28 
  10 -10   1    0.94    0.25 
  10  10   1    1.14    0.35 
  10  10   1    1.30    0.41 
  11 -10   1    1.10    0.30 
 -11 -10  -1    1.52    0.46 
 -11 -10  -1    0.78    0.34 
  11 -10   1    0.74    0.26 
  11  10   1    0.76    0.33 
  11  10   1    1.42    0.50 
 -11 -11   1    0.15    0.26 
  11 -11  -1    0.07    0.16 
 -11 -11   1    0.09    0.21 
  11 -11  -1    0.13    0.19 
  11  11  -1    0.27    0.26 
  11  11  -1    0.04    0.25 
 -10 -11   1    2.18    0.50 
  10 -11  -1    2.20    0.40 
 -10 -11   1    1.44    0.39 
  10 -11  -1    3.15    0.43 
  10  11  -1    2.31    0.46 
  10  11  -1    2.17    0.53 
   9 -11  -1   -0.22    0.09 
   9 -11  -1   -0.04    0.11 
  -9 -11   1    0.06    0.18 
  -9 -11   1    0.10    0.22 
   9  11  -1    0.11    0.18 
   9  11  -1   -0.01    0.20 
  -8 -11   1    0.75    0.30 
   8 -11  -1    1.10    0.25 
  -8 -11   1    0.75    0.29 
  -8 -11   1    0.79    0.28 
   8 -11  -1    0.66    0.26 
   8 -11  -1    0.72    0.20 
   8  11  -1    0.68    0.25 
   8  11  -1    0.75    0.33 
   7 -11  -1    1.14    0.28 
   7 -11  -1    1.03    0.22 
   7 -11  -1    1.13    0.22 
  -7 -11   1    1.07    0.33 
  -7 -11   1    1.64    0.35 
  -7 -11   1    0.87    0.28 
   7  11  -1    0.84    0.30 
   7  11  -1    0.97    0.25 
  -6 -11   1   37.12    1.64 
   6 -11  -1   36.03    1.37 
  -6 -11   1   36.82    1.62 
   6 -11  -1   35.80    1.52 
  -6 -11   1   36.60    1.53 
   6 -11  -1   38.03    1.37 
   6  11  -1   38.24    1.54 
   6  11  -1   37.75    1.71 
  -5 -11   1    0.19    0.16 
   5 -11  -1    0.38    0.17 
  -5 -11   1    0.45    0.19 
   5 -11  -1    0.46    0.13 
   5 -11  -1    0.20    0.10 
  -5 -11   1    0.22    0.14 
   5  11  -1    0.24    0.16 
   5  11  -1    0.22    0.14 
  -4 -11   1    8.99    0.44 
  -4 -11   1    8.76    0.59 
  -4 -11   1   10.29    0.65 
   4 -11  -1    8.53    0.45 
   4 -11  -1    9.37    0.45 
  -4 -11   1    9.62    0.56 
   4 -11  -1    9.42    0.59 
   4 -11  -1    8.21    0.46 
  -4  11   1    9.09    0.47 
   4  11  -1    9.07    0.64 
   4  11  -1    9.84    0.56 
   3 -11  -1    5.80    0.42 
   3 -11  -1    5.20    0.29 
  -3 -11   1    4.57    0.46 
  -3 -11   1    5.41    0.43 
  -3 -11   1    4.44    0.34 
   3 -11  -1    5.12    0.31 
  -3 -11   1    4.73    0.50 
   3 -11  -1    4.91    0.30 
  -3 -11   1    4.87    0.32 
   3  11  -1    4.99    0.47 
   3  11  -1    5.21    0.52 
   3  11  -1    5.09    0.37 
  -3  11   1    5.08    0.33 
   2 -11  -1    1.18    0.18 
  -2 -11   1    1.11    0.19 
  -2 -11   1    1.19    0.22 
  -2 -11   1    0.94    0.22 
   2 -11  -1    0.96    0.14 
  -2 -11   1    0.89    0.21 
  -2 -11   1    1.21    0.19 
   2 -11  -1    0.72    0.12 
   2 -11  -1    0.70    0.17 
  -2 -11   1    0.96    0.21 
  -2  11   1    0.98    0.17 
   2  11  -1    0.83    0.21 
   2  11  -1    1.06    0.18 
  -2  11   1    0.68    0.17 
   1 -11  -1    2.87    0.28 
  -1 -11   1    2.62    0.30 
   1 -11  -1    2.77    0.21 
  -1 -11   1    2.35    0.27 
   1 -11  -1    2.75    0.32 
  -1 -11   1    2.47    0.23 
   1 -11  -1    2.77    0.29 
  -1 -11   1    2.91    0.31 
  -1 -11   1    2.42    0.29 
   1  11  -1    2.08    0.29 
  -1  11   1    2.81    0.29 
   1  11  -1    2.35    0.19 
  -1  11   1    2.68    0.34 
   0 -11   1    2.38    0.25 
   0 -11   1    2.18    0.27 
   0 -11   1    2.52    0.25 
   0 -11   1    2.34    0.15 
   0 -11   1    2.54    0.24 
   0 -11  -1    2.85    0.29 
   0 -11  -1    2.32    0.30 
   0 -11  -1    2.46    0.29 
   0 -11  -1    1.85    0.25 
   0  11   1    2.18    0.31 
   0  11   1    1.89    0.25 
   0  11  -1    2.10    0.28 
   0  11  -1    2.01    0.15 
   1 -11   1   26.31    0.88 
  -1 -11  -1   24.98    1.04 
   1 -11   1   26.39    0.95 
   1 -11   1   26.10    0.84 
   1 -11   1   24.75    0.90 
   1 -11   1   26.09    1.06 
  -1 -11  -1   24.47    0.96 
  -1 -11  -1   25.55    0.98 
  -1 -11  -1   23.05    1.05 
  -1 -11  -1   25.98    1.07 
   1  11   1   24.28    1.10 
   1  11   1   24.06    1.02 
  -1  11  -1   24.97    1.00 
   2 -11   1   93.84    3.07 
  -2 -11  -1   88.11    2.99 
  -2 -11  -1   90.86    3.10 
   2 -11   1   92.91    2.78 
   2 -11   1   94.01    2.83 
   2 -11   1   91.08    2.78 
  -2 -11  -1   96.77    3.16 
  -2 -11  -1   94.28    2.93 
  -2  11  -1   91.60    2.95 
   2  11   1   91.33    3.05 
   2  11   1   90.19    3.14 
   2  11   1   94.98    3.12 
   3 -11   1    0.00    0.05 
  -3 -11  -1    0.00    0.10 
  -3 -11  -1    0.02    0.07 
  -3 -11  -1    0.08    0.12 
   3 -11   1    0.02    0.05 
   3 -11   1   -0.01    0.09 
  -3 -11  -1   -0.03    0.09 
   3 -11   1    0.00    0.04 
   3  11   1    0.14    0.14 
   3  11   1   -0.09    0.09 
   3  11   1    0.10    0.13 
  -4 -11  -1   38.95    1.59 
   4 -11   1   33.10    1.44 
   4 -11   1   38.08    1.28 
  -4 -11  -1   37.01    1.25 
  -4 -11  -1   34.72    1.45 
   4 -11   1   34.29    1.21 
  -4 -11  -1   36.57    1.56 
   4 -11   1   36.20    1.21 
   4  11   1   35.76    1.57 
   4  11   1   37.33    1.55 
   4  11   1   34.50    1.47 
   5 -11   1    4.13    0.28 
  -5 -11  -1    4.98    0.59 
  -5 -11  -1    4.48    0.57 
   5 -11   1    4.08    0.28 
   5 -11   1    4.49    0.42 
  -5 -11  -1    5.05    0.54 
   5 -11   1    3.14    0.43 
   5  11   1    5.59    0.59 
   5  11   1    3.39    0.51 
  -6 -11  -1    0.48    0.24 
  -6 -11  -1    0.15    0.17 
   6 -11   1    0.34    0.11 
   6 -11   1    0.73    0.24 
   6 -11   1    0.26    0.11 
  -6 -11  -1    0.29    0.22 
   6  11   1    0.19    0.18 
   6  11   1    0.08    0.17 
  -7 -11  -1    3.66    0.57 
  -7 -11  -1    6.63    0.76 
  -7 -11  -1    4.43    0.56 
   7 -11   1    4.86    0.36 
   7 -11   1    4.82    0.37 
   7 -11   1    4.23    0.53 
   7  11   1    4.59    0.59 
   7  11   1    4.87    0.67 
  -8 -11  -1    1.22    0.33 
   8 -11   1    1.60    0.28 
  -8 -11  -1    1.51    0.39 
   8 -11   1    1.26    0.24 
   8  11   1    1.78    0.39 
   8  11   1    1.30    0.39 
  -9 -11  -1   -0.03    0.19 
  -9 -11  -1    0.16    0.24 
   9 -11   1   -0.18    0.09 
   9 -11   1    0.00    0.12 
   9  11   1    0.17    0.26 
   9  11   1    0.15    0.20 
 -10 -11  -1    0.04    0.25 
  10 -11   1    0.03    0.14 
 -10 -11  -1   -0.16    0.19 
  10 -11   1   -0.02    0.14 
  10  11   1   -0.09    0.24 
  10  11   1    0.44    0.28 
  11 -11   1    0.08    0.17 
 -11 -11  -1   -0.06    0.23 
 -11 -11  -1   -0.17    0.23 
  11 -11   1    0.05    0.15 
  11  11   1   -0.14    0.23 
  11  11   1    0.36    0.27 
 -11 -12   1    1.52    0.47 
  11 -12  -1    1.33    0.33 
 -11 -12   1    0.71    0.35 
  11 -12  -1    1.29    0.32 
  11  12  -1    0.88    0.34 
  11  12  -1    0.50    0.39 
 -10 -12   1   14.96    0.98 
  10 -12  -1   12.74    0.80 
 -10 -12   1   13.89    1.05 
  10 -12  -1   13.32    0.80 
  10  12  -1   11.11    1.17 
  10  12  -1   12.22    0.89 
   9 -12  -1    0.18    0.13 
  -9 -12   1    0.52    0.29 
  -9 -12   1    0.12    0.17 
   9 -12  -1    0.39    0.18 
   9  12  -1    0.27    0.27 
   9  12  -1    0.28    0.24 
  -8 -12   1    5.89    0.72 
  -8 -12   1    4.85    0.66 
   8 -12  -1    6.69    0.48 
   8 -12  -1    6.31    0.47 
   8 -12  -1    7.24    0.73 
  -8 -12   1    5.60    0.64 
   8  12  -1    5.15    0.71 
   8  12  -1    7.38    0.71 
  -7 -12   1    0.03    0.17 
  -7 -12   1    0.19    0.16 
   7 -12  -1    0.16    0.13 
   7 -12  -1    0.24    0.13 
  -7 -12   1    0.05    0.18 
   7 -12  -1    0.03    0.14 
   7  12  -1    0.27    0.18 
   7  12  -1    0.09    0.20 
   6 -12  -1    5.52    0.38 
   6 -12  -1    5.10    0.36 
  -6 -12   1    4.05    0.49 
   6 -12  -1    4.48    0.53 
  -6 -12   1    4.57    0.58 
  -6 -12   1    4.29    0.55 
   6  12  -1    4.96    0.63 
   6  12  -1    5.60    0.56 
  -5 -12   1    3.80    0.46 
   5 -12  -1    4.04    0.47 
  -5 -12   1    4.17    0.52 
  -5 -12   1    3.84    0.50 
   5 -12  -1    3.68    0.30 
   5 -12  -1    3.66    0.29 
   5  12  -1    4.75    0.60 
   5  12  -1    4.44    0.48 
   4 -12  -1    3.18    0.26 
  -4 -12   1    3.69    0.48 
  -4 -12   1    3.40    0.31 
   4 -12  -1    3.26    0.31 
  -4 -12   1    3.61    0.41 
  -4 -12   1    4.93    0.54 
   4 -12  -1    3.07    0.42 
   4 -12  -1    3.18    0.25 
   4  12  -1    3.35    0.38 
   4  12  -1    3.31    0.46 
  -3 -12   1   44.33    1.73 
   3 -12  -1   43.75    1.66 
   3 -12  -1   44.22    1.46 
   3 -12  -1   42.28    1.45 
  -3 -12   1   44.30    1.70 
  -3 -12   1   43.90    1.67 
  -3 -12   1   44.17    1.52 
   3 -12  -1   42.54    1.49 
  -3 -12   1   42.50    1.57 
  -3  12   1   43.43    1.51 
   3  12  -1   42.52    1.56 
   3  12  -1   42.99    1.73 
  -2 -12   1    3.20    0.31 
  -2 -12   1    3.27    0.37 
  -2 -12   1    3.20    0.32 
  -2 -12   1    3.64    0.42 
   2 -12  -1    3.23    0.22 
   2 -12  -1    2.89    0.23 
  -2 -12   1    3.76    0.42 
   2 -12  -1    3.07    0.37 
   2 -12  -1    3.01    0.14 
  -2 -12   1    3.91    0.42 
   2 -12  -1    2.91    0.30 
  -2  12   1    3.27    0.26 
   2  12  -1    2.43    0.36 
   2  12  -1    3.07    0.31 
  -2  12   1    3.17    0.36 
  -1 -12   1    5.28    0.31 
  -1 -12   1    5.76    0.38 
  -1 -12   1    5.09    0.37 
   1 -12  -1    5.36    0.34 
   1 -12  -1    5.71    0.28 
   1 -12  -1    5.31    0.37 
  -1 -12   1    5.63    0.38 
  -1 -12   1    5.69    0.39 
   1 -12  -1    6.08    0.42 
   1 -12  -1    5.77    0.32 
   1  12  -1    5.41    0.31 
  -1  12   1    5.16    0.35 
   1  12  -1    5.76    0.43 
  -1  12   1    5.78    0.42 
   0 -12  -1    0.05    0.07 
   0 -12   1    0.11    0.08 
   0 -12  -1    0.09    0.08 
   0 -12   1    0.25    0.09 
   0 -12  -1    0.07    0.08 
   0 -12  -1    0.06    0.09 
   0 -12   1    0.05    0.08 
   0 -12   1    0.10    0.05 
   0 -12   1   -0.03    0.09 
   0 -12  -1    0.01    0.09 
   0  12  -1    0.15    0.11 
   0  12   1    0.14    0.10 
   0  12   1    0.12    0.11 
   0  12   1    0.06    0.09 
   0  12  -1    0.08    0.06 
   1 -12   1    2.21    0.23 
  -1 -12  -1    2.12    0.31 
  -1 -12  -1    2.47    0.34 
  -1 -12  -1    1.51    0.23 
   1 -12   1    1.63    0.27 
  -1 -12  -1    2.41    0.28 
  -1 -12  -1    1.75    0.27 
   1 -12   1    1.96    0.21 
   1 -12   1    1.69    0.13 
  -1  12  -1    1.76    0.26 
   1  12   1    2.09    0.30 
   1  12   1    2.06    0.33 
  -2 -12  -1    1.47    0.25 
   2 -12   1    1.42    0.15 
  -2 -12  -1    1.18    0.20 
  -2 -12  -1    1.12    0.26 
  -2 -12  -1    1.19    0.26 
   2 -12   1    1.62    0.15 
   2 -12   1    1.35    0.17 
   2 -12   1    1.51    0.27 
  -2 -12  -1    1.75    0.31 
   2  12   1    1.54    0.30 
   2  12   1    1.45    0.30 
   2  12   1    1.62    0.28 
  -2  12  -1    1.43    0.23 
  -3 -12  -1    0.10    0.09 
   3 -12   1    0.09    0.11 
   3 -12   1    0.00    0.05 
  -3 -12  -1    0.19    0.13 
   3 -12   1    0.17    0.07 
  -3 -12  -1    0.09    0.13 
   3 -12   1    0.10    0.06 
  -3 -12  -1   -0.03    0.10 
   3  12   1    0.14    0.15 
   3  12   1    0.27    0.15 
   3  12   1    0.14    0.13 
   4 -12   1    7.37    0.37 
   4 -12   1    8.31    0.58 
  -4 -12  -1    7.29    0.60 
  -4 -12  -1    6.78    0.68 
  -4 -12  -1    8.00    0.56 
   4 -12   1    7.60    0.41 
   4 -12   1    7.91    0.38 
  -4 -12  -1    8.01    0.42 
   4  12   1    7.96    0.63 
   4  12   1    8.24    0.58 
   5 -12   1    4.30    0.51 
  -5 -12  -1    3.55    0.50 
   5 -12   1    4.58    0.29 
  -5 -12  -1    5.79    0.61 
  -5 -12  -1    6.26    0.70 
   5 -12   1    4.17    0.29 
   5  12   1    3.00    0.50 
   5  12   1    4.00    0.52 
  -6 -12  -1   18.85    1.10 
   6 -12   1   18.06    0.78 
  -6 -12  -1   18.28    1.01 
   6 -12   1   19.86    1.04 
   6 -12   1   19.09    0.79 
  -6 -12  -1   17.11    1.07 
   6  12   1   18.07    1.11 
   6  12   1   19.53    1.05 
   7 -12   1    0.74    0.25 
  -7 -12  -1    0.59    0.29 
   7 -12   1    0.40    0.15 
  -7 -12  -1    0.29    0.23 
   7 -12   1    0.25    0.12 
  -7 -12  -1    0.44    0.23 
   7  12   1    0.16    0.20 
   7  12   1    0.01    0.18 
   8 -12   1    1.25    0.24 
  -8 -12  -1    1.79    0.46 
   8 -12   1    0.87    0.20 
  -8 -12  -1    1.97    0.42 
   8  12   1    1.55    0.41 
   8  12   1    1.58    0.37 
   9 -12   1    1.58    0.29 
  -9 -12  -1    1.93    0.43 
   9 -12   1    1.49    0.28 
  -9 -12  -1    1.37    0.44 
   9  12   1    1.37    0.37 
   9  12   1    1.46    0.45 
 -10 -12  -1   -0.01    0.20 
 -10 -12  -1   -0.01    0.25 
  10 -12   1    0.05    0.15 
  10 -12   1    0.03    0.13 
  10  12   1   -0.01    0.22 
  10  12   1   -0.01    0.24 
 -11 -12  -1    3.28    0.60 
  11 -12   1    2.56    0.41 
  11 -12   1    2.72    0.43 
 -11 -12  -1    3.39    0.66 
  11  12   1    3.01    0.58 
  10 -13  -1    1.51    0.33 
  10 -13  -1    1.27    0.31 
 -10 -13   1    1.84    0.42 
 -10 -13   1    1.18    0.42 
  10  13  -1    1.62    0.42 
  10  13  -1    0.42    0.30 
   9 -13  -1    0.21    0.14 
   9 -13  -1    0.08    0.15 
  -9 -13   1    0.07    0.21 
  -9 -13   1    0.27    0.25 
   9  13  -1    0.08    0.23 
   9  13  -1   -0.11    0.18 
  -8 -13   1    0.26    0.22 
   8 -13  -1    0.28    0.16 
   8 -13  -1    0.36    0.16 
  -8 -13   1   -0.07    0.15 
   8 -13  -1    0.07    0.19 
  -8 -13   1    0.04    0.18 
   8  13  -1    0.26    0.21 
   8  13  -1    0.14    0.23 
  -7 -13   1    7.26    0.78 
  -7 -13   1    9.50    0.77 
  -7 -13   1    9.77    0.68 
   7 -13  -1    9.57    0.71 
   7 -13  -1    8.93    0.54 
   7 -13  -1    9.45    0.55 
   7  13  -1    7.60    0.86 
   7  13  -1    9.65    0.68 
  -6 -13   1    1.99    0.40 
   6 -13  -1    2.50    0.30 
  -6 -13   1    2.21    0.37 
  -6 -13   1    2.32    0.44 
   6 -13  -1    2.32    0.29 
   6 -13  -1    2.71    0.42 
   6  13  -1    2.72    0.51 
   6  13  -1    2.24    0.36 
   5 -13  -1    1.17    0.20 
   5 -13  -1    1.48    0.22 
  -5 -13   1    1.33    0.29 
   5 -13  -1    1.68    0.33 
  -5 -13   1    1.26    0.30 
  -5 -13   1    1.52    0.32 
   5  13  -1    1.24    0.33 
   5  13  -1    1.47    0.28 
  -4 -13   1   -0.08    0.10 
   4 -13  -1    0.08    0.13 
  -4 -13   1    0.13    0.09 
  -4 -13   1    0.11    0.15 
   4 -13  -1    0.00    0.06 
   4 -13  -1   -0.06    0.06 
  -4 -13   1    0.00    0.09 
   4  13  -1   -0.06    0.11 
   4  13  -1    0.26    0.14 
  -3 -13   1   28.02    1.11 
  -3 -13   1   26.10    1.21 
   3 -13  -1   27.25    0.99 
   3 -13  -1   24.91    1.17 
   3 -13  -1   28.11    1.05 
   3 -13  -1   28.16    1.01 
  -3 -13   1   28.01    1.07 
  -3 -13   1   26.90    1.19 
  -3  13   1   28.10    1.16 
   3  13  -1   28.02    1.10 
   3  13  -1   25.81    1.24 
  -2 -13   1    2.12    0.26 
   2 -13  -1    1.77    0.29 
   2 -13  -1    1.93    0.23 
   2 -13  -1    1.69    0.19 
  -2 -13   1    2.03    0.31 
   2 -13  -1    1.63    0.09 
   2 -13  -1    1.74    0.25 
  -2 -13   1    1.43    0.23 
  -2 -13   1    2.18    0.32 
  -2 -13   1    1.20    0.25 
  -2  13   1    1.96    0.25 
   2  13  -1    2.02    0.26 
  -2  13   1    1.94    0.30 
   2  13  -1    2.17    0.34 
  -1 -13   1   29.30    1.16 
  -1 -13   1   28.84    1.13 
   1 -13  -1   28.49    0.97 
  -1 -13   1   30.10    1.04 
   1 -13  -1   28.61    1.03 
  -1 -13   1   30.17    1.15 
   1 -13  -1   27.73    1.09 
  -1 -13   1   28.39    1.14 
   1 -13  -1   27.84    1.13 
   1 -13  -1   28.04    1.18 
  -1  13   1   26.91    1.19 
  -1  13   1   28.25    1.09 
   1  13  -1   29.71    1.23 
   1  13  -1   28.68    1.02 
   0 -13  -1   13.07    0.66 
   0 -13  -1   14.17    0.71 
   0 -13   1   13.29    0.51 
   0 -13   1   14.71    0.72 
   0 -13  -1   12.50    0.56 
   0 -13   1   13.70    0.58 
   0 -13  -1   13.65    0.68 
   0 -13   1   13.10    0.61 
   0 -13   1   12.80    0.62 
   0 -13  -1   13.88    0.64 
   0  13   1   12.17    0.63 
   0  13  -1   12.82    0.50 
   0  13   1   12.45    0.64 
   0  13  -1   13.16    0.70 
   0  13   1   14.11    0.75 
   1 -13   1   18.84    0.88 
  -1 -13  -1   17.87    0.81 
  -1 -13  -1   18.26    0.78 
  -1 -13  -1   17.94    0.85 
   1 -13   1   18.18    0.65 
   1 -13   1   17.84    0.73 
  -1 -13  -1   19.15    0.89 
   1 -13   1   18.08    0.72 
  -1 -13  -1   17.68    0.88 
   1  13   1   16.89    0.81 
   1  13   1   18.58    0.94 
  -1  13  -1   17.62    0.83 
  -2 -13  -1    0.23    0.17 
  -2 -13  -1   -0.06    0.10 
  -2 -13  -1   -0.02    0.09 
   2 -13   1    0.17    0.09 
   2 -13   1    0.11    0.05 
  -2 -13  -1    0.15    0.10 
   2 -13   1    0.01    0.05 
   2 -13   1    0.11    0.10 
  -2 -13  -1    0.14    0.11 
   2  13   1    0.17    0.12 
   2  13   1    0.14    0.12 
  -2  13  -1    0.18    0.11 
  -3 -13  -1   -0.04    0.09 
  -3 -13  -1    0.08    0.08 
   3 -13   1    0.04    0.06 
  -3 -13  -1    0.00    0.10 
   3 -13   1    0.03    0.06 
   3 -13   1    0.09    0.05 
   3 -13   1    0.07    0.13 
  -3 -13  -1   -0.07    0.10 
   3  13   1    0.03    0.11 
   3  13   1   -0.10    0.11 
  -3  13  -1   -0.02    0.08 
  -4 -13  -1   19.24    0.97 
   4 -13   1   20.57    0.77 
  -4 -13  -1   20.88    0.84 
   4 -13   1   20.84    0.76 
  -4 -13  -1   19.12    1.06 
   4 -13   1   18.53    1.00 
  -4 -13  -1   20.26    1.09 
   4 -13   1   21.14    0.81 
   4  13   1   19.80    1.10 
   4  13   1   20.30    1.02 
   5 -13   1    8.33    0.41 
  -5 -13  -1    7.25    0.58 
   5 -13   1    7.18    0.39 
  -5 -13  -1    7.72    0.78 
  -5 -13  -1    7.03    0.73 
   5 -13   1    7.60    0.60 
   5  13   1    7.30    0.76 
   5  13   1    7.41    0.60 
   6 -13   1    6.61    0.41 
  -6 -13  -1    7.53    0.61 
   6 -13   1    7.75    0.43 
   6 -13   1    7.94    0.76 
  -6 -13  -1    7.26    0.78 
  -6 -13  -1    7.94    0.83 
   6  13   1    5.91    0.76 
   6  13   1    7.32    0.74 
   7 -13   1    0.72    0.17 
  -7 -13  -1    1.05    0.34 
   7 -13   1    1.64    0.38 
  -7 -13  -1    1.23    0.32 
  -7 -13  -1    0.86    0.30 
   7 -13   1    1.19    0.23 
   7  13   1    1.02    0.31 
   7  13   1    0.42    0.26 
   8 -13   1    0.03    0.10 
  -8 -13  -1    0.20    0.21 
   8 -13   1    0.14    0.12 
  -8 -13  -1   -0.01    0.20 
   8 -13   1    0.07    0.19 
   8  13   1    0.18    0.20 
   8  13   1    0.34    0.28 
  -9 -13  -1    1.76    0.45 
  -9 -13  -1    0.76    0.30 
   9 -13   1    1.11    0.25 
   9 -13   1    1.07    0.24 
   9  13   1    1.53    0.45 
   9  13   1    1.46    0.40 
  10 -13   1    0.64    0.22 
 -10 -13  -1    0.70    0.38 
 -10 -13  -1    1.11    0.40 
  10 -13   1    0.42    0.21 
  10  13   1    0.56    0.36 
  10  13   1    0.32    0.27 
 -10 -14   1    1.36    0.39 
  10 -14  -1    1.81    0.37 
  10 -14  -1    1.85    0.35 
 -10 -14   1    0.88    0.39 
  10  14  -1    1.14    0.44 
  -9 -14   1    0.15    0.23 
   9 -14  -1    0.19    0.15 
   9 -14  -1    0.02    0.12 
  -9 -14   1   -0.14    0.20 
   9  14  -1   -0.04    0.27 
   9  14  -1    0.14    0.21 
  -8 -14   1    0.07    0.21 
  -8 -14   1    0.20    0.21 
   8 -14  -1   -0.03    0.11 
   8 -14  -1    0.30    0.22 
  -8 -14   1    0.18    0.20 
   8  14  -1    0.07    0.18 
   8  14  -1    0.24    0.25 
  -7 -14   1   -0.11    0.16 
   7 -14  -1   -0.10    0.07 
   7 -14  -1   -0.02    0.16 
  -7 -14   1    0.26    0.19 
  -7 -14   1   -0.10    0.16 
   7 -14  -1   -0.01    0.10 
   7  14  -1   -0.03    0.19 
   7  14  -1   -0.10    0.14 
  -6 -14   1   -0.18    0.13 
   6 -14  -1    0.04    0.09 
  -6 -14   1   -0.09    0.10 
  -6 -14   1   -0.12    0.14 
   6 -14  -1    0.13    0.10 
   6 -14  -1    0.08    0.14 
   6  14  -1   -0.09    0.11 
   6  14  -1   -0.16    0.14 
   5 -14  -1    0.01    0.09 
   5 -14  -1    0.09    0.09 
  -5 -14   1    0.09    0.14 
  -5 -14   1    0.04    0.14 
   5 -14  -1   -0.04    0.11 
  -5 -14   1   -0.04    0.13 
   5  14  -1    0.01    0.17 
   5  14  -1    0.15    0.14 
  -4 -14   1    2.53    0.30 
   4 -14  -1    2.12    0.25 
   4 -14  -1    2.25    0.28 
  -4 -14   1    2.55    0.43 
  -4 -14   1    3.57    0.43 
  -4 -14   1    2.08    0.35 
   4 -14  -1    2.07    0.36 
   4  14  -1    2.12    0.32 
   4  14  -1    1.96    0.39 
   3 -14  -1    6.07    0.36 
   3 -14  -1    5.62    0.34 
   3 -14  -1    5.81    0.39 
  -3 -14   1    5.83    0.41 
  -3 -14   1    5.11    0.53 
   3 -14  -1    7.05    0.64 
  -3 -14   1    5.95    0.41 
  -3 -14   1    6.46    0.53 
  -3  14   1    6.60    0.48 
   3  14  -1    6.34    0.66 
   3  14  -1    5.88    0.41 
   2 -14  -1    3.34    0.35 
   2 -14  -1    2.52    0.36 
  -2 -14   1    2.20    0.34 
   2 -14  -1    2.61    0.28 
  -2 -14   1    2.86    0.39 
  -2 -14   1    2.55    0.35 
   2 -14  -1    2.37    0.24 
  -2 -14   1    2.71    0.32 
  -2 -14   1    2.61    0.29 
   2  14  -1    3.26    0.32 
   2  14  -1    2.79    0.41 
  -2  14   1    1.75    0.30 
  -1 -14   1   12.66    0.65 
   1 -14  -1   12.28    0.69 
  -1 -14   1   13.37    0.68 
   1 -14  -1   12.43    0.50 
  -1 -14   1   12.11    0.55 
   1 -14  -1   12.72    0.63 
  -1 -14   1   11.84    0.66 
  -1 -14   1   13.88    0.66 
   1 -14  -1   12.41    0.66 
   1 -14  -1   13.34    0.57 
  -1  14   1   13.67    0.63 
  -1  14   1   11.60    0.70 
   1  14  -1   12.72    0.55 
   1  14  -1   12.67    0.73 
   0 -14   1   16.81    0.70 
   0 -14  -1   16.63    0.80 
   0 -14  -1   16.13    0.75 
   0 -14   1   17.93    0.77 
   0 -14  -1   16.51    0.69 
   0 -14   1   16.45    0.83 
   0 -14  -1   17.76    0.85 
   0 -14  -1   18.79    0.85 
   0 -14   1   16.79    0.76 
   0 -14   1   16.76    0.63 
   0  14   1   17.08    0.78 
   0  14   1   16.75    0.77 
   0  14   1   16.80    0.89 
   0  14  -1   17.43    0.86 
   1 -14   1    2.83    0.29 
  -1 -14  -1    3.24    0.33 
   1 -14   1    2.42    0.35 
   1 -14   1    2.56    0.18 
  -1 -14  -1    2.57    0.37 
   1 -14   1    3.04    0.30 
  -1 -14  -1    2.78    0.34 
  -1 -14  -1    2.64    0.37 
  -1 -14  -1    3.32    0.39 
  -1  14  -1    3.32    0.39 
   1  14   1    3.24    0.37 
   1  14   1    3.33    0.44 
  -2 -14  -1    0.91    0.21 
   2 -14   1    0.55    0.10 
  -2 -14  -1    0.88    0.20 
   2 -14   1    0.96    0.16 
   2 -14   1    0.67    0.13 
  -2 -14  -1    0.09    0.13 
  -2 -14  -1    0.65    0.21 
   2 -14   1    0.72    0.22 
   2  14   1    0.53    0.21 
  -2  14  -1    0.49    0.17 
   2  14   1    0.70    0.20 
   3 -14   1    3.81    0.47 
  -3 -14  -1    2.95    0.45 
  -3 -14  -1    2.82    0.38 
  -3 -14  -1    3.83    0.50 
   3 -14   1    2.98    0.21 
   3 -14   1    3.00    0.21 
  -3 -14  -1    3.42    0.35 
   3 -14   1    2.90    0.28 
   3  14   1    3.59    0.52 
  -3  14  -1    3.15    0.37 
   3  14   1    3.50    0.45 
  -4 -14  -1    0.88    0.26 
   4 -14   1    1.19    0.17 
  -4 -14  -1    1.10    0.20 
   4 -14   1    0.88    0.14 
   4 -14   1    1.00    0.17 
   4 -14   1    0.76    0.23 
  -4 -14  -1    0.58    0.24 
  -4 -14  -1    0.39    0.18 
   4  14   1    0.89    0.26 
   4  14   1    0.90    0.28 
  -5 -14  -1    0.04    0.18 
   5 -14   1    0.11    0.08 
   5 -14   1    0.12    0.15 
  -5 -14  -1    0.04    0.15 
  -5 -14  -1    0.14    0.17 
   5 -14   1    0.08    0.08 
   5  14   1   -0.11    0.15 
   5  14   1   -0.02    0.14 
  -6 -14  -1    0.06    0.19 
  -6 -14  -1    0.11    0.17 
   6 -14   1    0.37    0.12 
  -6 -14  -1    0.13    0.18 
   6 -14   1    0.04    0.17 
   6 -14   1    0.12    0.11 
   6  14   1    0.21    0.19 
   6  14   1    0.37    0.27 
  -7 -14  -1    0.11    0.20 
   7 -14   1    0.08    0.11 
   7 -14   1   -0.02    0.17 
   7 -14   1   -0.03    0.08 
  -7 -14  -1   -0.12    0.16 
  -7 -14  -1   -0.08    0.15 
   7  14   1    0.10    0.19 
   7  14   1   -0.14    0.17 
   8 -14   1    0.09    0.11 
   8 -14   1    0.36    0.26 
  -8 -14  -1    0.09    0.21 
  -8 -14  -1    0.16    0.22 
   8 -14   1    0.20    0.14 
   8  14   1    0.59    0.27 
   8  14   1    0.20    0.24 
   9 -14   1    7.63    0.53 
  -9 -14  -1    7.24    0.92 
   9 -14   1    6.19    0.48 
  -9 -14  -1    5.01    0.68 
   9  14   1    7.12    0.82 
   9  14   1    5.80    0.86 
 -10 -14  -1    3.86    0.62 
 -10 -14  -1    2.74    0.60 
  10 -14   1    3.98    0.50 
  10 -14   1    3.38    0.43 
  10  14   1    3.35    0.60 
  10  14   1    2.72    0.66 
  10 -15  -1    0.92    0.28 
  10 -15  -1    0.99    0.26 
 -10 -15   1    0.77    0.36 
 -10 -15   1    0.63    0.31 
  10  15  -1    1.72    0.51 
   9 -15  -1    0.09    0.14 
  -9 -15   1    0.46    0.32 
   9 -15  -1   -0.04    0.13 
  -9 -15   1    0.13    0.24 
   9  15  -1   -0.07    0.24 
   8 -15  -1    1.80    0.30 
   8 -15  -1    2.72    0.50 
  -8 -15   1    1.68    0.41 
  -8 -15   1    1.84    0.46 
  -8 -15   1    2.65    0.49 
   8 -15  -1    2.17    0.33 
   8  15  -1    2.71    0.57 
   7 -15  -1    6.77    0.73 
  -7 -15   1    6.49    0.68 
  -7 -15   1    6.27    0.73 
   7 -15  -1    6.65    0.46 
  -7 -15   1    6.70    0.77 
   7 -15  -1    5.70    0.44 
   7  15  -1    6.25    0.65 
   7  15  -1    6.27    0.82 
  -6 -15   1    0.23    0.21 
  -6 -15   1    0.90    0.29 
   6 -15  -1    0.63    0.17 
   6 -15  -1    0.47    0.16 
   6 -15  -1    1.02    0.30 
  -6 -15   1    0.66    0.28 
   6  15  -1    0.64    0.29 
   6  15  -1    0.58    0.23 
  -5 -15   1    8.77    0.69 
   5 -15  -1    8.67    0.65 
   5 -15  -1    7.89    0.48 
  -5 -15   1    7.85    0.57 
   5 -15  -1    7.67    0.45 
   5  15  -1    8.09    0.86 
   5  15  -1    7.68    0.56 
  -4 -15   1    0.53    0.24 
   4 -15  -1    0.50    0.15 
   4 -15  -1    0.41    0.13 
  -4 -15   1    0.54    0.21 
   4 -15  -1    0.20    0.16 
  -4 -15   1    0.27    0.13 
  -4 -15   1    0.36    0.17 
  -4  15   1    0.59    0.21 
   4  15  -1    0.39    0.17 
   4  15  -1    0.66    0.26 
   3 -15  -1   17.82    0.94 
   3 -15  -1   17.36    0.81 
  -3 -15   1   19.52    0.99 
  -3 -15   1   17.71    0.82 
   3 -15  -1   17.63    0.73 
   3 -15  -1   18.10    0.76 
  -3 -15   1   18.22    0.83 
  -3 -15   1   15.06    0.88 
   3  15  -1   18.45    0.82 
   3  15  -1   18.24    1.00 
  -3  15   1   17.54    0.90 
  -2 -15   1    0.98    0.24 
   2 -15  -1    1.10    0.20 
  -2 -15   1    1.41    0.23 
   2 -15  -1    0.87    0.15 
  -2 -15   1    0.91    0.21 
   2 -15  -1    1.06    0.22 
   2 -15  -1    0.67    0.21 
  -2 -15   1    0.69    0.20 
   2  15  -1    1.02    0.27 
  -2  15   1    1.19    0.27 
  -1 -15   1    0.64    0.18 
  -1 -15   1    0.35    0.16 
   1 -15  -1    0.80    0.16 
   1 -15  -1    0.75    0.19 
  -1 -15   1    0.52    0.13 
   1 -15  -1    0.67    0.20 
  -1 -15   1    0.78    0.21 
   1 -15  -1    0.68    0.12 
  -1 -15   1    0.86    0.20 
   1 -15  -1    0.76    0.20 
  -1  15   1    0.49    0.20 
   1  15  -1    0.68    0.22 
   0 -15   1    6.07    0.42 
   0 -15  -1    7.12    0.44 
   0 -15   1    7.35    0.46 
   0 -15  -1    6.80    0.38 
   0 -15   1    7.16    0.34 
   0 -15  -1    7.98    0.53 
   0 -15   1    7.23    0.51 
   0 -15  -1    7.33    0.50 
   0 -15  -1    7.27    0.51 
   0 -15   1    7.86    0.41 
   0  15   1    6.59    0.65 
   0  15  -1    5.63    0.48 
   0  15   1    6.32    0.44 
  -1 -15  -1    3.89    0.38 
   1 -15   1    3.09    0.41 
   1 -15   1    3.50    0.28 
  -1 -15  -1    3.47    0.45 
   1 -15   1    3.67    0.22 
   1 -15   1    3.34    0.33 
  -1 -15  -1    3.26    0.42 
  -1 -15  -1    4.55    0.45 
  -1  15  -1    2.79    0.38 
   1  15   1    3.46    0.40 
   1  15   1    3.18    0.46 
   2 -15   1    2.15    0.17 
   2 -15   1    3.19    0.30 
  -2 -15  -1    2.55    0.40 
  -2 -15  -1    2.78    0.43 
   2 -15   1    3.00    0.28 
   2 -15   1    2.98    0.41 
  -2 -15  -1    2.90    0.35 
  -2 -15  -1    3.13    0.37 
  -2  15  -1    2.62    0.37 
   2  15   1    2.41    0.41 
   2  15   1    3.19    0.40 
  -3 -15  -1    0.56    0.23 
  -3 -15  -1    0.74    0.26 
   3 -15   1    0.70    0.12 
   3 -15   1    0.73    0.13 
   3 -15   1    0.75    0.15 
  -3 -15  -1    0.81    0.20 
  -3 -15  -1    0.78    0.21 
   3 -15   1    0.51    0.21 
  -3  15  -1    0.67    0.21 
   3  15   1    0.58    0.21 
   3  15   1    0.68    0.26 
  -4 -15  -1    2.68    0.46 
   4 -15   1    2.76    0.28 
  -4 -15  -1    2.35    0.41 
  -4 -15  -1    3.29    0.45 
  -4 -15  -1    2.53    0.31 
   4 -15   1    3.07    0.25 
   4 -15   1    2.65    0.42 
   4 -15   1    2.54    0.24 
   4  15   1    2.13    0.42 
   4  15   1    2.92    0.43 
  -4  15  -1    2.39    0.35 
  -5 -15  -1   12.34    0.87 
  -5 -15  -1   11.11    0.75 
   5 -15   1   12.12    0.55 
   5 -15   1   11.46    0.79 
   5 -15   1   11.46    0.55 
  -5 -15  -1   11.87    0.85 
   5  15   1   10.40    0.74 
   5  15   1   12.93    0.91 
   6 -15   1    1.00    0.19 
   6 -15   1    0.86    0.30 
  -6 -15  -1    1.25    0.39 
  -6 -15  -1    1.09    0.33 
  -6 -15  -1    0.97    0.30 
   6 -15   1    1.23    0.20 
   6  15   1    1.45    0.39 
   6  15   1    1.40    0.33 
  -7 -15  -1    0.26    0.21 
   7 -15   1    0.40    0.28 
  -7 -15  -1    0.11    0.20 
  -7 -15  -1    0.97    0.38 
   7 -15   1    0.29    0.13 
   7 -15   1    0.46    0.16 
   7  15   1    0.51    0.24 
   7  15   1    0.37    0.26 
   8 -15   1    0.38    0.27 
  -8 -15  -1    0.20    0.28 
   8 -15   1    0.52    0.18 
  -8 -15  -1    0.27    0.26 
  -8 -15  -1    0.26    0.21 
   8 -15   1    0.23    0.14 
   8  15   1    0.36    0.26 
   8  15   1   -0.04    0.24 
   9 -15   1    1.21    0.27 
  -9 -15  -1    2.00    0.52 
  -9 -15  -1    1.59    0.41 
   9 -15   1    2.08    0.34 
   9  15   1    1.58    0.48 
   9  15   1    1.23    0.35 
 -10 -15  -1    1.11    0.43 
  10 -15   1    1.36    0.29 
  10 -15   1    1.42    0.32 
 -10 -15  -1    1.31    0.42 
  10  15   1    1.64    0.47 
  10  15   1    0.64    0.41 
 -10 -16   1    1.80    0.46 
  10 -16  -1    0.90    0.28 
  10 -16  -1    1.07    0.28 
 -10 -16   1    1.04    0.40 
  10  16  -1    2.39    0.67 
   9 -16  -1    0.24    0.18 
   9 -16  -1   -0.03    0.25 
  -9 -16   1   -0.05    0.20 
   9 -16  -1    0.16    0.16 
  -9 -16   1    0.80    0.37 
   9  16  -1    0.21    0.25 
  -8 -16   1   -0.04    0.21 
   8 -16  -1    0.02    0.21 
   8 -16  -1   -0.08    0.11 
  -8 -16   1   -0.11    0.17 
   8 -16  -1    0.04    0.12 
  -8 -16   1    0.09    0.22 
   8  16  -1   -0.11    0.21 
   7 -16  -1    0.45    0.24 
   7 -16  -1    0.47    0.16 
  -7 -16   1    0.46    0.26 
  -7 -16   1    0.38    0.22 
   7 -16  -1    0.36    0.16 
  -7 -16   1    0.42    0.23 
   7  16  -1    0.34    0.26 
  -6 -16   1    2.59    0.41 
  -6 -16   1    1.91    0.41 
   6 -16  -1    1.99    0.41 
  -6 -16   1    1.45    0.36 
   6 -16  -1    2.12    0.31 
   6 -16  -1    2.11    0.29 
   6  16  -1    1.90    0.45 
   5 -16  -1    5.01    0.38 
  -5 -16   1    4.32    0.58 
  -5 -16   1    4.60    0.56 
   5 -16  -1    4.66    0.58 
  -5 -16   1    4.14    0.49 
   5 -16  -1    4.62    0.35 
   5  16  -1    3.98    0.59 
   4 -16  -1   17.59    1.02 
   4 -16  -1   19.95    0.89 
  -4 -16   1   21.36    1.11 
  -4 -16   1   18.97    0.89 
  -4 -16   1   19.14    1.04 
  -4 -16   1   19.58    0.94 
   4 -16  -1   19.54    0.83 
  -4  16   1   18.77    0.98 
   4  16  -1   22.48    1.18 
   3 -16  -1    4.95    0.55 
   3 -16  -1    4.45    0.44 
  -3 -16   1    5.02    0.59 
  -3 -16   1    4.52    0.52 
  -3 -16   1    3.70    0.41 
   3 -16  -1    4.59    0.34 
  -3 -16   1    4.15    0.42 
  -3  16   1    3.95    0.50 
   3  16  -1    4.79    0.58 
   2 -16  -1   15.87    0.68 
  -2 -16   1   17.24    0.84 
  -2 -16   1   17.29    0.75 
  -2 -16   1   15.64    0.87 
   2 -16  -1   17.64    0.78 
  -2 -16   1   16.05    0.84 
   2 -16  -1   15.97    0.80 
   2 -16  -1   15.82    0.88 
  -2  16   1   15.80    0.89 
   2  16  -1   15.39    0.91 
   1 -16  -1    0.21    0.13 
   1 -16  -1   -0.02    0.10 
  -1 -16   1    0.16    0.13 
  -1 -16   1    0.03    0.10 
   1 -16  -1    0.22    0.11 
  -1 -16   1    0.19    0.13 
  -1 -16   1    0.39    0.12 
   1 -16  -1    0.02    0.11 
  -1 -16   1    0.16    0.13 
   1  16  -1    0.58    0.23 
  -1  16   1    0.29    0.19 
   0 -16  -1    1.56    0.30 
   0 -16  -1    1.72    0.31 
   0 -16   1    1.49    0.28 
   0 -16   1    1.54    0.17 
   0 -16  -1    1.22    0.20 
   0 -16   1    0.83    0.20 
   0 -16  -1    0.72    0.21 
   0 -16   1    1.20    0.19 
   0 -16   1    1.31    0.23 
   0  16   1    0.80    0.25 
   0  16  -1    1.27    0.28 
  -1 -16  -1    6.78    0.63 
   1 -16   1    5.07    0.55 
  -1 -16  -1    4.92    0.36 
   1 -16   1    4.82    0.35 
  -1 -16  -1    4.74    0.48 
   1 -16   1    4.80    0.27 
  -1 -16  -1    5.68    0.57 
   1 -16   1    4.84    0.35 
   1  16   1    4.53    0.54 
  -1  16  -1    4.92    0.53 
  -2 -16  -1   -0.04    0.12 
   2 -16   1   -0.02    0.05 
   2 -16   1    0.16    0.09 
  -2 -16  -1    0.15    0.11 
  -2 -16  -1    0.15    0.12 
   2 -16   1    0.05    0.09 
   2 -16   1    0.00    0.12 
  -2 -16  -1    0.14    0.17 
   2  16   1    0.17    0.15 
  -2  16  -1   -0.11    0.10 
   2  16   1    0.03    0.16 
  -3 -16  -1   33.33    1.36 
  -3 -16  -1   33.08    1.51 
   3 -16   1   32.32    1.19 
   3 -16   1   31.35    1.45 
   3 -16   1   31.90    1.14 
  -3 -16  -1   32.10    1.29 
   3 -16   1   32.82    1.11 
  -3 -16  -1   33.00    1.50 
   3  16   1   33.61    1.40 
   3  16   1   31.19    1.53 
  -3  16  -1   32.64    1.36 
  -4 -16  -1    2.12    0.42 
   4 -16   1    2.94    0.28 
   4 -16   1    2.36    0.28 
  -4 -16  -1    2.33    0.32 
   4 -16   1    2.31    0.44 
   4 -16   1    2.76    0.27 
  -4 -16  -1    3.01    0.42 
  -4 -16  -1    3.08    0.49 
  -4  16  -1    3.06    0.40 
   4  16   1    2.61    0.48 
   4  16   1    3.41    0.48 
  -5 -16  -1   16.85    1.07 
   5 -16   1   18.37    1.05 
   5 -16   1   17.01    0.72 
  -5 -16  -1   16.44    1.05 
  -5 -16  -1   19.08    1.00 
   5 -16   1   16.70    0.73 
   5  16   1   16.52    1.10 
   5  16   1   17.70    1.00 
   6 -16   1    4.40    0.33 
  -6 -16  -1    4.96    0.67 
   6 -16   1    3.19    0.54 
   6 -16   1    4.48    0.33 
  -6 -16  -1    4.40    0.59 
  -6 -16  -1    4.76    0.69 
   6  16   1    6.18    0.82 
   6  16   1    4.75    0.60 
  -7 -16  -1    0.13    0.20 
   7 -16   1    0.34    0.14 
  -7 -16  -1    0.10    0.25 
   7 -16   1    0.14    0.12 
  -7 -16  -1    0.09    0.17 
   7 -16   1    0.06    0.20 
   7  16   1    0.26    0.25 
   7  16   1    0.63    0.27 
   8 -16   1    0.47    0.27 
  -8 -16  -1    0.14    0.23 
   8 -16   1    0.08    0.12 
  -8 -16  -1    0.16    0.24 
   8 -16   1    0.01    0.11 
  -8 -16  -1    0.02    0.23 
   8  16   1   -0.08    0.21 
   8  16   1    0.13    0.23 
   9 -16   1    6.91    0.52 
  -9 -16  -1    6.76    0.80 
  -9 -16  -1    7.65    0.98 
   9 -16   1    6.55    0.50 
   9  16   1    4.84    0.81 
  10 -16   1    1.61    0.32 
 -10 -16  -1    0.89    0.37 
 -10 -16  -1    0.51    0.33 
  10 -16   1    1.61    0.33 
  10  16   1    1.23    0.52 
 -10 -17   1    2.57    0.52 
  10 -17  -1    3.00    0.44 
  10 -17  -1    2.37    0.39 
  -9 -17   1    1.54    0.47 
   9 -17  -1    2.01    0.49 
   9 -17  -1    2.17    0.37 
  -9 -17   1    2.42    0.48 
  -9 -17   1    2.44    0.54 
   9 -17  -1    1.82    0.33 
   9  17  -1    1.77    0.52 
   8 -17  -1    9.43    0.62 
   8 -17  -1    9.73    0.62 
   8 -17  -1   10.67    1.01 
  -8 -17   1   10.55    0.78 
  -8 -17   1    9.95    1.09 
  -8 -17   1   10.22    1.06 
   8  17  -1   10.10    1.12 
   7 -17  -1    4.82    0.48 
  -7 -17   1    4.86    0.66 
   7 -17  -1    3.98    0.63 
  -7 -17   1    4.99    0.61 
   7 -17  -1    5.47    0.43 
  -7 -17   1    5.78    0.76 
   7  17  -1    5.05    0.77 
   6 -17  -1   -0.14    0.14 
   6 -17  -1    0.15    0.13 
  -6 -17   1    0.29    0.20 
   6 -17  -1    0.49    0.17 
  -6 -17   1    0.27    0.21 
  -6 -17   1    0.37    0.27 
   6  17  -1    0.21    0.25 
  -5 -17   1    0.37    0.25 
   5 -17  -1    0.40    0.24 
  -5 -17   1    0.61    0.21 
   5 -17  -1    0.27    0.15 
  -5 -17   1    0.13    0.17 
   5 -17  -1    0.33    0.15 
   5  17  -1    0.14    0.19 
  -5  17   1    0.20    0.17 
  -4 -17   1    0.56    0.25 
   4 -17  -1    0.78    0.18 
  -4 -17   1    0.89    0.27 
  -4 -17   1    1.07    0.26 
   4 -17  -1    0.92    0.21 
   4 -17  -1    0.47    0.23 
  -4  17   1    1.00    0.26 
   4  17  -1    0.34    0.23 
  -3 -17   1    5.11    0.40 
   3 -17  -1    5.46    0.38 
   3 -17  -1    4.44    0.56 
  -3 -17   1    4.78    0.54 
  -3 -17   1    5.56    0.63 
   3 -17  -1    4.71    0.47 
  -3 -17   1    4.73    0.48 
   3  17  -1    4.34    0.60 
  -3  17   1    5.37    0.60 
   2 -17  -1    1.34    0.25 
   2 -17  -1    1.28    0.30 
  -2 -17   1    1.61    0.25 
  -2 -17   1    0.98    0.27 
  -2 -17   1    1.25    0.29 
  -2 -17   1    1.75    0.31 
   2 -17  -1    1.70    0.29 
   2  17  -1    0.99    0.29 
  -2  17   1    1.48    0.34 
   1 -17  -1    3.55    0.42 
   1 -17  -1    2.95    0.43 
   1 -17  -1    3.09    0.40 
  -1 -17   1    3.26    0.31 
  -1 -17   1    2.65    0.38 
  -1 -17   1    2.81    0.41 
  -1 -17   1    3.76    0.43 
   1  17  -1    2.66    0.43 
  -1  17   1    3.06    0.46 
   0 -17   1   30.24    1.10 
   0 -17   1   29.47    1.18 
   0 -17   1   28.98    1.21 
   0 -17  -1   28.79    1.07 
   0 -17   1   29.65    1.31 
   0 -17  -1   28.84    1.28 
   0 -17  -1   31.45    1.29 
   0 -17  -1   28.02    1.27 
   0  17  -1   28.56    1.32 
   0  17   1   28.40    1.37 
   1 -17   1    0.02    0.14 
   1 -17   1    0.25    0.14 
  -1 -17  -1   -0.10    0.08 
  -1 -17  -1    0.03    0.10 
  -1 -17  -1    0.09    0.16 
  -1 -17  -1    0.02    0.12 
   1 -17   1    0.00    0.06 
   1 -17   1   -0.05    0.10 
   1  17   1    0.09    0.15 
  -1  17  -1    0.07    0.14 
  -2 -17  -1    1.13    0.24 
   2 -17   1    1.07    0.28 
   2 -17   1    1.23    0.21 
  -2 -17  -1    1.03    0.24 
  -2 -17  -1    1.28    0.33 
   2 -17   1    1.49    0.23 
  -2 -17  -1    1.27    0.31 
   2 -17   1    1.36    0.16 
   2  17   1    1.16    0.33 
  -2  17  -1    1.28    0.29 
   3 -17   1    1.65    0.24 
   3 -17   1    1.10    0.30 
   3 -17   1    0.95    0.18 
  -3 -17  -1    1.44    0.28 
  -3 -17  -1    0.74    0.27 
   3 -17   1    1.47    0.17 
  -3 -17  -1    1.30    0.28 
  -3 -17  -1    1.02    0.29 
  -3  17  -1    0.95    0.25 
   3  17   1    1.00    0.30 
  -4 -17  -1    0.17    0.19 
   4 -17   1    0.17    0.10 
   4 -17   1    0.07    0.08 
  -4 -17  -1    0.16    0.17 
   4 -17   1    0.03    0.10 
  -4 -17  -1    0.17    0.19 
   4 -17   1    0.25    0.18 
  -4 -17  -1    0.00    0.12 
   4  17   1    0.13    0.23 
  -4  17  -1    0.03    0.13 
   5 -17   1   15.81    0.73 
   5 -17   1   16.23    0.71 
  -5 -17  -1   16.63    1.08 
   5 -17   1   18.13    1.07 
  -5 -17  -1   16.39    1.06 
  -5 -17  -1   18.56    0.99 
   5  17   1   16.95    1.12 
  -5  17  -1   16.71    0.90 
   6 -17   1    3.89    0.59 
   6 -17   1    6.06    0.39 
  -6 -17  -1    5.46    0.65 
  -6 -17  -1    6.33    0.78 
  -6 -17  -1    6.05    0.79 
   6 -17   1    4.59    0.36 
   6  17   1    6.74    0.85 
   7 -17   1    0.04    0.10 
   7 -17   1    0.09    0.19 
   7 -17   1   -0.06    0.10 
  -7 -17  -1    0.11    0.20 
  -7 -17  -1    0.04    0.23 
  -7 -17  -1    0.06    0.22 
   7  17   1    0.30    0.27 
   8 -17   1    3.58    0.42 
  -8 -17  -1    2.78    0.50 
  -8 -17  -1    2.47    0.55 
   8 -17   1    2.82    0.54 
  -8 -17  -1    3.69    0.67 
   8 -17   1    2.91    0.35 
   8  17   1    1.83    0.51 
   9 -17   1    0.20    0.15 
   9 -17   1    0.14    0.15 
  -9 -17  -1    0.17    0.30 
  -9 -17  -1    0.44    0.32 
   9  17   1    0.18    0.33 
  -9 -18   1    1.79    0.44 
  -9 -18   1    1.04    0.40 
   9 -18  -1    0.99    0.26 
  -9 -18   1    1.03    0.40 
   9 -18  -1    1.29    0.43 
   9 -18  -1    1.15    0.28 
   9  18  -1    0.41    0.38 
   8 -18  -1    0.15    0.16 
  -8 -18   1    0.25    0.24 
  -8 -18   1    0.22    0.26 
   8 -18  -1    0.10    0.14 
   8 -18  -1    0.15    0.24 
  -8 -18   1    0.54    0.29 
   8  18  -1    0.12    0.26 
  -7 -18   1    0.55    0.27 
  -7 -18   1    0.60    0.30 
   7 -18  -1    0.19    0.21 
   7 -18  -1    0.73    0.22 
  -7 -18   1    0.41    0.23 
   7 -18  -1    0.41    0.17 
   7  18  -1    0.20    0.27 
  -6 -18   1   -0.12    0.13 
  -6 -18   1   -0.03    0.18 
   6 -18  -1    0.12    0.14 
   6 -18  -1    0.11    0.13 
   6 -18  -1    0.09    0.17 
  -6 -18   1   -0.18    0.15 
   6  18  -1   -0.03    0.20 
  -6  18   1    0.23    0.20 
  -5 -18   1    1.14    0.33 
  -5 -18   1    0.76    0.24 
   5 -18  -1    0.78    0.21 
  -5 -18   1    0.79    0.31 
   5 -18  -1    0.32    0.23 
   5 -18  -1    0.76    0.18 
  -5  18   1    0.49    0.22 
   5  18  -1    1.09    0.36 
   4 -18  -1   29.76    1.42 
   4 -18  -1   28.06    1.20 
   4 -18  -1   28.88    1.14 
  -4 -18   1   27.28    1.21 
  -4 -18   1   28.54    1.40 
  -4 -18   1   29.93    1.38 
  -4  18   1   27.44    1.33 
   4  18  -1   26.12    1.43 
  -3 -18   1    0.61    0.22 
  -3 -18   1    0.46    0.24 
  -3 -18   1    0.27    0.16 
   3 -18  -1    0.54    0.23 
  -3 -18   1    0.58    0.19 
   3 -18  -1    0.56    0.18 
   3 -18  -1    0.44    0.18 
  -3  18   1    0.60    0.24 
   3  18  -1    0.31    0.21 
   2 -18  -1    9.37    0.60 
  -2 -18   1   11.39    0.58 
  -2 -18   1   10.30    0.71 
   2 -18  -1   10.77    0.65 
   2 -18  -1   11.13    0.75 
  -2 -18   1   10.10    0.66 
  -2 -18   1   11.10    0.68 
   2  18  -1   10.25    0.76 
  -2  18   1   10.97    0.74 
  -1 -18   1   26.04    1.21 
   1 -18  -1   26.20    1.16 
  -1 -18   1   24.11    1.16 
  -1 -18   1   26.21    0.99 
  -1 -18   1   26.57    1.15 
   1 -18  -1   27.02    1.20 
   1 -18  -1   27.38    1.26 
   1  18  -1   25.38    1.28 
  -1  18   1   26.90    1.30 
   0 -18   1   25.34    0.99 
   0 -18  -1   24.27    1.17 
   0 -18  -1   24.52    1.15 
   0 -18   1   25.07    1.06 
   0 -18  -1   24.72    1.17 
   0 -18   1   24.51    1.18 
   0 -18   1   26.42    1.12 
   0  18   1   23.24    1.24 
   0  18  -1   24.28    1.21 
   1 -18   1   20.18    1.04 
   1 -18   1   18.45    0.84 
  -1 -18  -1   18.31    1.00 
  -1 -18  -1   20.24    0.84 
  -1 -18  -1   19.31    1.02 
  -1 -18  -1   18.48    0.95 
   1 -18   1   18.80    0.72 
   1 -18   1   18.01    0.85 
   1  18   1   17.08    1.04 
  -1  18  -1   17.99    0.99 
  -2 -18  -1   19.58    0.99 
  -2 -18  -1   21.14    0.94 
   2 -18   1   19.85    0.86 
   2 -18   1   19.37    1.08 
  -2 -18  -1   21.37    1.12 
   2 -18   1   21.15    0.75 
  -2 -18  -1   20.89    1.11 
   2 -18   1   20.25    0.88 
  -2  18  -1   21.34    1.06 
   2  18   1   19.86    1.15 
  -3 -18  -1    3.90    0.47 
   3 -18   1    4.59    0.33 
  -3 -18  -1    3.56    0.53 
   3 -18   1    4.45    0.59 
   3 -18   1    3.90    0.32 
  -3 -18  -1    5.45    0.53 
  -3 -18  -1    6.17    0.71 
   3 -18   1    4.79    0.28 
   3  18   1    4.09    0.61 
  -3  18  -1    4.90    0.57 
  -4 -18  -1    0.10    0.14 
  -4 -18  -1    0.10    0.16 
  -4 -18  -1   -0.09    0.14 
   4 -18   1    0.06    0.10 
   4 -18   1   -0.04    0.13 
   4 -18   1    0.10    0.11 
  -4  18  -1   -0.02    0.14 
   4  18   1   -0.08    0.16 
  -5 -18  -1    6.10    0.64 
   5 -18   1    5.80    0.40 
   5 -18   1    5.13    0.67 
   5 -18   1    5.90    0.38 
  -5 -18  -1    4.62    0.65 
  -5 -18  -1    6.16    0.73 
   5  18   1    5.00    0.75 
  -5  18  -1    5.46    0.61 
   6 -18   1    2.74    0.32 
   6 -18   1    3.07    0.33 
  -6 -18  -1    3.97    0.63 
  -6 -18  -1    2.40    0.47 
   6 -18   1    2.96    0.53 
  -6 -18  -1    2.61    0.51 
  -6  18  -1    2.44    0.43 
   6  18   1    2.86    0.60 
  -7 -18  -1    4.58    0.64 
  -7 -18  -1    5.53    0.75 
  -7 -18  -1    4.78    0.73 
   7 -18   1    4.83    0.68 
   7 -18   1    5.93    0.43 
   7 -18   1    5.78    0.42 
   7  18   1    6.02    0.87 
  -8 -18  -1   15.28    1.14 
   8 -18   1   14.56    1.08 
  -8 -18  -1   15.04    1.03 
   8 -18   1   15.39    0.78 
   8 -18   1   15.34    0.78 
  -8 -18  -1   15.39    1.16 
   8  18   1   15.27    1.22 
   9 -18   1    0.03    0.13 
   9 -18   1   -0.01    0.14 
  -9 -18  -1    0.22    0.25 
  -9 -18  -1    0.17    0.29 
   9  18   1    0.10    0.29 
  -9 -19   1    2.67    0.63 
   9 -19  -1    3.16    0.63 
   9 -19  -1    2.46    0.39 
  -9 -19   1    2.31    0.47 
  -9 -19   1    1.91    0.49 
   9 -19  -1    2.96    0.43 
   9  19  -1    1.49    0.52 
   8 -19  -1    1.65    0.47 
  -8 -19   1    1.06    0.35 
   8 -19  -1    1.52    0.31 
   8 -19  -1    1.09    0.27 
  -8 -19   1    1.01    0.41 
  -8 -19   1    1.31    0.37 
   8  19  -1    2.67    0.58 
   7 -19  -1    1.85    0.32 
   7 -19  -1    1.93    0.32 
  -7 -19   1    2.21    0.43 
  -7 -19   1    1.44    0.41 
   7 -19  -1    1.38    0.39 
  -7 -19   1    1.25    0.42 
   7  19  -1    1.21    0.44 
  -7  19   1    1.36    0.33 
   6 -19  -1    0.45    0.18 
  -6 -19   1    0.66    0.32 
  -6 -19   1    0.19    0.18 
   6 -19  -1    0.72    0.28 
   6 -19  -1    0.35    0.19 
  -6 -19   1    0.08    0.19 
  -6  19   1    0.35    0.24 
   6  19  -1    0.22    0.24 
   5 -19  -1    0.83    0.30 
  -5 -19   1    0.83    0.31 
  -5 -19   1    0.68    0.26 
  -5 -19   1    0.98    0.27 
   5 -19  -1    0.91    0.22 
   5 -19  -1    0.69    0.21 
   5  19  -1    1.01    0.33 
  -5  19   1    1.63    0.39 
   4 -19  -1    3.54    0.39 
  -4 -19   1    3.59    0.55 
   4 -19  -1    3.37    0.42 
  -4 -19   1    3.64    0.45 
   4 -19  -1    3.31    0.52 
  -4 -19   1    3.11    0.48 
   4  19  -1    3.27    0.54 
  -4  19   1    2.53    0.44 
  -3 -19   1    0.52    0.22 
  -3 -19   1    1.18    0.33 
   3 -19  -1    0.36    0.21 
  -3 -19   1    0.51    0.19 
  -3 -19   1    0.49    0.20 
   3 -19  -1    0.68    0.19 
   3 -19  -1    0.41    0.17 
   3  19  -1    0.71    0.28 
  -3  19   1    0.52    0.25 
   2 -19  -1    4.50    0.49 
   2 -19  -1    4.13    0.55 
  -2 -19   1    4.04    0.51 
  -2 -19   1    4.38    0.41 
   2 -19  -1    5.19    0.53 
  -2 -19   1    3.64    0.51 
  -2 -19   1    4.35    0.51 
   2  19  -1    4.52    0.62 
  -2  19   1    3.17    0.49 
  -1 -19   1   31.12    1.38 
   1 -19  -1   30.42    1.33 
  -1 -19   1   28.94    1.27 
  -1 -19   1   31.29    1.35 
   1 -19  -1   29.26    1.30 
   1 -19  -1   29.58    1.39 
  -1  19   1   30.27    1.45 
   1  19  -1   30.84    1.46 
   0 -19  -1    7.80    0.61 
   0 -19   1    7.58    0.55 
   0 -19  -1    7.83    0.60 
   0 -19  -1    7.06    0.58 
   0 -19   1    7.72    0.51 
   0 -19   1    8.40    0.64 
   0  19   1    9.00    0.71 
   0  19  -1    8.52    0.65 
   1 -19   1    1.20    0.23 
   1 -19   1    1.73    0.20 
  -1 -19  -1    1.43    0.29 
  -1 -19  -1    1.96    0.38 
   1 -19   1    1.49    0.35 
  -1 -19  -1    1.87    0.27 
  -1 -19  -1    1.69    0.34 
   1 -19   1    1.81    0.31 
  -1  19  -1    1.60    0.36 
   1  19   1    1.83    0.41 
  -2 -19  -1    1.19    0.34 
   2 -19   1    1.51    0.24 
   2 -19   1    1.31    0.17 
   2 -19   1    1.57    0.37 
  -2 -19  -1    1.16    0.31 
   2 -19   1    1.45    0.25 
  -2 -19  -1    1.59    0.33 
  -2 -19  -1    1.11    0.24 
  -2  19  -1    1.06    0.29 
   2  19   1    0.89    0.33 
  -3 -19  -1    0.81    0.30 
   3 -19   1    1.21    0.22 
  -3 -19  -1    1.33    0.30 
  -3 -19  -1    1.48    0.30 
   3 -19   1    1.15    0.32 
  -3 -19  -1    1.23    0.34 
   3 -19   1    1.15    0.17 
   3 -19   1    1.12    0.22 
  -3  19  -1    1.17    0.30 
   3  19   1    1.08    0.35 
  -4 -19  -1    4.81    0.55 
   4 -19   1    4.37    0.39 
  -4 -19  -1    3.76    0.57 
  -4 -19  -1    3.55    0.60 
   4 -19   1    3.99    0.39 
   4 -19   1    3.28    0.54 
   4  19   1    3.94    0.63 
  -4  19  -1    3.30    0.49 
  -5 -19  -1    0.30    0.21 
  -5 -19  -1    0.00    0.18 
   5 -19   1   -0.02    0.10 
  -5 -19  -1   -0.01    0.21 
   5 -19   1   -0.13    0.10 
   5 -19   1    0.08    0.20 
  -5  19  -1    0.10    0.17 
   5  19   1    0.02    0.18 
   6 -19   1    4.27    0.64 
  -6 -19  -1    4.43    0.67 
   6 -19   1    5.80    0.42 
  -6 -19  -1    3.90    0.65 
  -6 -19  -1    5.61    0.67 
   6 -19   1    5.63    0.39 
   6  19   1    4.42    0.71 
  -6  19  -1    5.48    0.64 
  -7 -19  -1   -0.07    0.22 
  -7 -19  -1    0.07    0.24 
   7 -19   1    0.13    0.13 
   7 -19   1    0.20    0.13 
   7 -19   1    0.15    0.26 
  -7 -19  -1    0.03    0.19 
   7  19   1   -0.10    0.24 
   8 -19   1    6.19    0.47 
   8 -19   1    6.83    0.86 
  -8 -19  -1    5.65    0.79 
  -8 -19  -1    5.39    0.71 
  -8 -19  -1    6.04    0.86 
   8  19   1    6.11    0.92 
   9 -19   1    0.10    0.15 
  -9 -19  -1   -0.05    0.24 
  -9 -19  -1   -0.36    0.26 
   9  19   1   -0.05    0.29 
   9 -20  -1    3.46    0.47 
   9 -20  -1    3.93    0.69 
   9 -20  -1    3.84    0.50 
  -9 -20   1    4.09    0.64 
  -9 -20   1    2.88    0.63 
   9  20  -1    4.02    0.85 
  -8 -20   1    2.22    0.57 
  -8 -20   1    1.46    0.43 
   8 -20  -1    2.00    0.35 
  -8 -20   1    1.79    0.42 
   8 -20  -1    1.93    0.49 
   8 -20  -1    1.51    0.31 
  -8  20   1    2.03    0.48 
   8  20  -1    1.22    0.47 
  -7 -20   1    0.12    0.19 
  -7 -20   1    0.30    0.25 
   7 -20  -1    0.06    0.20 
   7 -20  -1    0.01    0.15 
  -7 -20   1   -0.08    0.22 
   7 -20  -1    0.16    0.16 
   7  20  -1   -0.21    0.20 
  -7  20   1    0.09    0.22 
  -6 -20   1    6.85    0.85 
  -6 -20   1    7.57    0.60 
  -6 -20   1    7.32    0.83 
   6 -20  -1    6.31    0.48 
   6 -20  -1    5.51    0.74 
   6 -20  -1    6.99    0.55 
  -6  20   1    6.71    0.75 
   6  20  -1    7.25    0.90 
   5 -20  -1   44.62    1.65 
  -5 -20   1   43.20    1.75 
  -5 -20   1   44.26    1.93 
  -5 -20   1   40.81    1.96 
   5 -20  -1   44.96    2.00 
   5 -20  -1   42.34    1.69 
   5  20  -1   42.25    2.05 
  -5  20   1   43.44    1.90 
  -4 -20   1    3.80    0.47 
  -4 -20   1    3.33    0.51 
   4 -20  -1    3.61    0.43 
   4 -20  -1    3.32    0.44 
  -4 -20   1    3.39    0.55 
   4 -20  -1    3.08    0.52 
  -4  20   1    3.32    0.52 
   4  20  -1    4.86    0.69 
  -3 -20   1    0.46    0.19 
   3 -20  -1    0.35    0.18 
   3 -20  -1    0.75    0.24 
  -3 -20   1    0.70    0.25 
  -3 -20   1    0.87    0.25 
   3 -20  -1    0.39    0.23 
  -3 -20   1    0.14    0.20 
   3  20  -1    0.42    0.23 
  -3  20   1    0.40    0.22 
  -2 -20   1    3.37    0.47 
  -2 -20   1    4.34    0.34 
  -2 -20   1    3.50    0.46 
   2 -20  -1    3.40    0.51 
   2 -20  -1    4.44    0.51 
   2 -20  -1    3.77    0.46 
  -2 -20   1    3.25    0.50 
   2  20  -1    3.66    0.58 
  -2  20   1    4.42    0.58 
   1 -20  -1    3.00    0.43 
   1 -20  -1    2.60    0.43 
  -1 -20   1    2.21    0.35 
  -1 -20   1    3.17    0.47 
  -1 -20   1    2.94    0.43 
   1 -20  -1    2.83    0.41 
  -1  20   1    2.73    0.48 
   1  20  -1    2.49    0.45 
   0 -20  -1   12.55    0.77 
   0 -20  -1   10.82    0.75 
   0 -20  -1    9.86    0.71 
   0 -20   1   11.91    0.65 
   0 -20   1   11.29    0.70 
   0 -20   1   10.51    0.74 
   0  20  -1    9.57    0.75 
   0  20   1   10.07    0.79 
   1 -20   1    1.59    0.35 
  -1 -20  -1    2.28    0.40 
   1 -20   1    2.18    0.31 
  -1 -20  -1    1.94    0.39 
  -1 -20  -1    2.57    0.45 
   1 -20   1    2.71    0.38 
  -1  20  -1    1.73    0.37 
   1  20   1    2.14    0.47 
  -2 -20  -1    7.72    0.81 
   2 -20   1    7.05    0.49 
   2 -20   1    5.76    0.69 
  -2 -20  -1    6.81    0.66 
  -2 -20  -1    7.17    0.49 
  -2 -20  -1    7.23    0.75 
   2 -20   1    5.69    0.41 
  -2  20  -1    5.78    0.64 
   2  20   1    6.93    0.82 
   3 -20   1   16.57    0.78 
  -3 -20  -1   16.98    1.04 
  -3 -20  -1   16.46    1.05 
   3 -20   1   13.78    0.97 
  -3 -20  -1   17.40    0.89 
  -3 -20  -1   17.41    0.92 
   3 -20   1   15.90    0.74 
  -3  20  -1   17.76    1.00 
   3  20   1   15.51    1.07 
   4 -20   1   -0.05    0.17 
  -4 -20  -1    0.28    0.20 
  -4 -20  -1    0.07    0.20 
  -4 -20  -1   -0.18    0.14 
   4 -20   1   -0.19    0.10 
   4 -20   1   -0.10    0.10 
  -4  20  -1   -0.14    0.15 
   4  20   1   -0.13    0.19 
  -5 -20  -1    1.25    0.42 
   5 -20   1    1.36    0.24 
   5 -20   1    1.19    0.25 
  -5 -20  -1    1.38    0.40 
  -5 -20  -1    1.49    0.35 
   5 -20   1    1.90    0.46 
   5  20   1    0.39    0.28 
  -5  20  -1    1.51    0.37 
  -6 -20  -1    3.72    0.53 
   6 -20   1    3.49    0.38 
   6 -20   1    3.43    0.60 
  -6 -20  -1    3.18    0.58 
  -6 -20  -1    3.15    0.59 
   6  20   1    3.05    0.62 
  -6  20  -1    3.35    0.54 
   7 -20   1    1.29    0.26 
  -7 -20  -1    1.93    0.49 
  -7 -20  -1    2.15    0.47 
   7 -20   1    2.30    0.53 
  -7 -20  -1    1.51    0.50 
   7  20   1    1.06    0.45 
  -8 -20  -1    0.02    0.27 
  -8 -20  -1    0.06    0.22 
   8 -20   1    0.17    0.16 
   8 -20   1    0.39    0.34 
  -8 -20  -1    0.46    0.36 
   8  20   1    0.54    0.36 
  -8 -21   1    0.34    0.30 
  -8 -21   1    0.70    0.32 
   8 -21  -1    0.48    0.34 
   8 -21  -1    0.50    0.22 
   8 -21  -1    0.61    0.23 
  -8 -21   1    0.83    0.32 
   8  21  -1    0.00    0.29 
  -8  21   1   -0.06    0.26 
  -7 -21   1    8.92    1.00 
   7 -21  -1    9.41    0.62 
  -7 -21   1    8.93    0.97 
  -7 -21   1    8.93    0.72 
   7 -21  -1    9.50    0.66 
   7 -21  -1    7.55    0.91 
   7  21  -1    8.92    1.05 
  -7  21   1    9.45    0.95 
  -6 -21   1    1.46    0.46 
   6 -21  -1    1.24    0.29 
   6 -21  -1    1.35    0.43 
  -6 -21   1    1.16    0.31 
  -6 -21   1    1.66    0.43 
   6 -21  -1    1.96    0.33 
  -6  21   1    1.21    0.38 
   6  21  -1    1.73    0.47 
   5 -21  -1    1.29    0.30 
  -5 -21   1    1.22    0.38 
   5 -21  -1    1.33    0.38 
  -5 -21   1    0.95    0.31 
   5 -21  -1    0.69    0.23 
  -5 -21   1    0.87    0.27 
   5  21  -1    0.44    0.29 
  -5  21   1    0.67    0.31 
   4 -21  -1    0.38    0.19 
  -4 -21   1    0.03    0.16 
   4 -21  -1    0.12    0.16 
   4 -21  -1    0.17    0.20 
  -4 -21   1    0.29    0.24 
  -4 -21   1   -0.06    0.13 
  -4  21   1   -0.02    0.20 
   4  21  -1    0.62    0.31 
   3 -21  -1   -0.07    0.16 
  -3 -21   1    0.04    0.17 
  -3 -21   1    0.04    0.13 
  -3 -21   1   -0.17    0.14 
  -3 -21   1    0.02    0.14 
   3 -21  -1    0.09    0.15 
   3 -21  -1    0.01    0.15 
   3  21  -1    0.07    0.22 
  -3  21   1    0.09    0.22 
  -2 -21   1   -0.06    0.12 
   2 -21  -1   -0.02    0.15 
   2 -21  -1    0.15    0.17 
   2 -21  -1    0.03    0.13 
  -2 -21   1    0.15    0.17 
  -2 -21   1    0.05    0.15 
   2  21  -1    0.09    0.21 
  -2  21   1    0.00    0.18 
   1 -21  -1    0.63    0.23 
   1 -21  -1    0.95    0.29 
   1 -21  -1    0.32    0.21 
  -1 -21   1    0.76    0.23 
  -1 -21   1    0.77    0.26 
  -1 -21   1    0.31    0.20 
  -1  21   1    0.62    0.29 
   1  21  -1    0.55    0.27 
   0 -21   1   -0.09    0.13 
   0 -21  -1    0.08    0.14 
   0 -21  -1    0.19    0.19 
   0 -21   1    0.00    0.11 
   0 -21  -1    0.22    0.17 
   0 -21   1    0.06    0.17 
   0  21   1   -0.10    0.18 
   0  21  -1   -0.07    0.17 
  -1 -21  -1   -0.17    0.13 
   1 -21   1   -0.14    0.12 
   1 -21   1    0.09    0.18 
   1 -21   1    0.12    0.12 
  -1 -21  -1   -0.06    0.12 
  -1 -21  -1    0.03    0.17 
   1  21   1   -0.03    0.15 
  -1  21  -1   -0.06    0.17 
   2 -21   1   20.88    0.91 
  -2 -21  -1   22.71    1.13 
  -2 -21  -1   20.18    1.15 
  -2 -21  -1   19.79    1.18 
   2 -21   1   22.31    1.24 
   2 -21   1   22.32    1.00 
  -2  21  -1   20.55    1.15 
   2  21   1   22.56    1.30 
  -3 -21  -1    3.74    0.47 
  -3 -21  -1    2.87    0.55 
  -3 -21  -1    2.80    0.49 
  -3 -21  -1    4.58    0.55 
   3 -21   1    2.85    0.50 
   3 -21   1    3.74    0.38 
   3 -21   1    2.81    0.38 
  -3  21  -1    4.08    0.56 
   3  21   1    3.78    0.62 
  -4 -21  -1    8.81    0.91 
  -4 -21  -1    8.62    0.95 
  -4 -21  -1    8.91    0.64 
   4 -21   1    8.49    0.50 
   4 -21   1    8.96    0.93 
   4  21   1    9.42    1.01 
  -4  21  -1    8.58    0.70 
   5 -21   1    6.63    0.45 
  -5 -21  -1    7.40    0.88 
  -5 -21  -1    7.03    0.72 
  -5 -21  -1    7.60    0.85 
   5 -21   1    6.51    0.81 
   5  21   1    6.91    0.93 
  -5  21  -1    6.69    0.74 
  -6 -21  -1    0.03    0.23 
   6 -21   1    0.39    0.16 
   6 -21   1    0.34    0.31 
  -6 -21  -1   -0.10    0.18 
  -6 -21  -1    0.07    0.26 
   6  21   1    0.12    0.28 
   7 -21   1    6.13    0.82 
   7 -21   1    5.11    0.50 
  -7 -21  -1    5.84    0.85 
  -7 -21  -1    4.28    0.71 
  -7 -21  -1    5.58    0.69 
   7  21   1    4.80    0.83 
   8 -21   1    6.23    0.89 
  -8 -21  -1    6.79    0.94 
  -8 -21  -1    5.85    0.88 
  -8 -21  -1    5.60    0.74 
   8 -21   1    6.21    0.49 
   8  21   1    5.56    0.88 
  -8 -22   1    0.08    0.24 
   8 -22  -1    0.08    0.29 
  -8 -22   1   -0.29    0.23 
  -8 -22   1    0.03    0.19 
   8 -22  -1   -0.01    0.18 
   8  22  -1   -0.02    0.27 
   7 -22  -1    1.78    0.48 
   7 -22  -1    2.27    0.38 
   7 -22  -1    2.53    0.41 
  -7 -22   1    2.40    0.45 
  -7 -22   1    2.51    0.54 
  -7 -22   1    1.64    0.47 
   7  22  -1    1.26    0.46 
  -7  22   1    2.48    0.52 
  -6 -22   1    2.83    0.55 
   6 -22  -1    3.26    0.45 
  -6 -22   1    3.34    0.51 
  -6 -22   1    3.28    0.60 
   6 -22  -1    2.29    0.38 
   6 -22  -1    2.51    0.53 
  -6  22   1    2.71    0.53 
   6  22  -1    3.58    0.69 
   5 -22  -1    9.76    1.01 
   5 -22  -1   10.52    0.67 
   5 -22  -1   10.65    0.70 
  -5 -22   1    9.29    0.92 
  -5 -22   1   12.06    0.94 
  -5 -22   1   10.67    0.71 
  -5  22   1    8.75    0.93 
   5  22  -1   10.95    1.11 
  -4 -22   1    2.76    0.53 
   4 -22  -1    2.79    0.42 
   4 -22  -1    2.79    0.41 
   4 -22  -1    3.00    0.56 
  -4 -22   1    3.16    0.43 
  -4 -22   1    3.50    0.54 
   4  22  -1    2.61    0.52 
  -4  22   1    2.93    0.55 
   3 -22  -1    0.06    0.19 
  -3 -22   1    0.08    0.20 
   3 -22  -1    0.27    0.22 
   3 -22  -1    0.18    0.17 
  -3 -22   1   -0.09    0.17 
  -3 -22   1    0.10    0.17 
  -3  22   1    0.18    0.22 
   3  22  -1   -0.11    0.20 
   2 -22  -1    0.44    0.26 
  -2 -22   1    0.46    0.20 
  -2 -22   1    0.76    0.29 
   2 -22  -1    0.62    0.25 
   2 -22  -1    0.30    0.18 
  -2 -22   1    0.38    0.22 
  -2  22   1    0.65    0.27 
   2  22  -1    0.94    0.35 
  -1 -22   1    0.16    0.17 
   1 -22  -1    0.70    0.25 
   1 -22  -1    0.20    0.19 
  -1 -22   1    0.34    0.22 
   1 -22  -1    0.14    0.18 
  -1 -22   1    0.34    0.18 
  -1  22   1    0.34    0.25 
   1  22  -1    0.23    0.23 
   0 -22   1   -0.11    0.13 
   0 -22   1    0.01    0.11 
   0 -22  -1    0.10    0.16 
   0 -22   1    0.07    0.16 
   0 -22  -1   -0.03    0.17 
   0 -22  -1   -0.03    0.16 
   0  22  -1    0.16    0.21 
   0  22   1    0.19    0.22 
   1 -22   1    0.37    0.23 
   1 -22   1    0.66    0.18 
  -1 -22  -1    0.50    0.23 
   1 -22   1    0.55    0.23 
  -1 -22  -1    0.38    0.27 
  -1 -22  -1    0.58    0.25 
  -1  22  -1    0.56    0.27 
   1  22   1    0.44    0.27 
  -2 -22  -1    2.44    0.42 
  -2 -22  -1    2.75    0.50 
   2 -22   1    2.50    0.37 
   2 -22   1    2.04    0.43 
   2 -22   1    2.08    0.29 
  -2 -22  -1    3.64    0.56 
   2  22   1    1.64    0.43 
  -2  22  -1    2.63    0.47 
   3 -22   1   15.82    0.74 
  -3 -22  -1   18.50    1.11 
  -3 -22  -1   17.81    1.14 
  -3 -22  -1   17.98    0.91 
  -3 -22  -1   19.22    1.01 
   3 -22   1   15.02    1.07 
   3  22   1   16.86    1.17 
  -3  22  -1   15.92    1.02 
   4 -22   1    0.07    0.12 
  -4 -22  -1    0.61    0.30 
  -4 -22  -1    0.15    0.22 
  -4 -22  -1   -0.01    0.16 
   4 -22   1   -0.03    0.19 
  -4  22  -1    0.15    0.22 
   4  22   1    0.11    0.26 
   5 -22   1    0.19    0.13 
  -5 -22  -1    0.13    0.22 
   5 -22   1    0.17    0.23 
  -5 -22  -1   -0.22    0.20 
  -5 -22  -1   -0.01    0.16 
   5  22   1    0.10    0.28 
  -6 -22  -1    0.56    0.31 
   6 -22   1    0.02    0.22 
  -6 -22  -1    0.32    0.30 
  -6 -22  -1    0.00    0.19 
   6 -22   1    0.17    0.15 
   6  22   1    0.21    0.31 
  -7 -22  -1    0.15    0.31 
   7 -22   1    0.26    0.16 
   7 -22   1    0.14    0.29 
  -7 -22  -1    0.25    0.29 
  -7 -22  -1    0.22    0.26 
   7  22   1    0.14    0.29 
   8 -22   1    0.99    0.40 
  -8 -22  -1    0.92    0.41 
  -8 -22  -1    0.23    0.24 
   8 -22   1    0.94    0.24 
   8  22   1    1.67    0.60 
   7 -23  -1    2.41    0.41 
  -7 -23   1    2.40    0.57 
  -7 -23   1    2.13    0.43 
   7 -23  -1    2.16    0.53 
  -7 -23   1    2.19    0.49 
  -7  23   1    2.17    0.57 
   7  23  -1    1.99    0.54 
   6 -23  -1    2.54    0.55 
  -6 -23   1    2.52    0.53 
   6 -23  -1    2.52    0.41 
  -6 -23   1    2.31    0.52 
  -6 -23   1    2.14    0.42 
   6  23  -1    2.23    0.54 
  -6  23   1    2.48    0.53 
  -5 -23   1   15.90    1.03 
   5 -23  -1   15.23    0.86 
  -5 -23   1   15.51    0.89 
   5 -23  -1   15.03    1.10 
   5 -23  -1   14.52    0.86 
  -5 -23   1   14.65    1.07 
   5  23  -1   16.01    1.18 
  -5  23   1   13.71    1.02 
  -4 -23   1    3.62    0.59 
   4 -23  -1    3.67    0.48 
   4 -23  -1    3.90    0.51 
  -4 -23   1    2.78    0.48 
  -4 -23   1    3.55    0.46 
   4 -23  -1    4.30    0.68 
  -4  23   1    3.46    0.59 
   4  23  -1    2.87    0.59 
   3 -23  -1    2.71    0.42 
   3 -23  -1    1.72    0.43 
  -3 -23   1    2.68    0.45 
  -3 -23   1    2.14    0.47 
   3 -23  -1    2.27    0.39 
  -3  23   1    1.72    0.44 
   3  23  -1    1.68    0.45 
   2 -23  -1    5.05    0.59 
   2 -23  -1    4.86    0.56 
   2 -23  -1    3.78    0.61 
  -2 -23   1    4.08    0.58 
  -2 -23   1    3.97    0.56 
  -2 -23   1    5.16    0.58 
  -2  23   1    3.72    0.61 
   2  23  -1    3.74    0.62 
  -1 -23   1    5.61    0.58 
   1 -23  -1    5.83    0.63 
  -1 -23   1    4.55    0.62 
   1 -23  -1    6.64    0.72 
  -1 -23   1    5.49    0.65 
   1 -23  -1    5.73    0.71 
  -1  23   1    5.61    0.75 
   1  23  -1    5.02    0.69 
   0 -23  -1    1.21    0.35 
   0 -23   1    2.17    0.33 
   0 -23  -1    1.89    0.41 
   0 -23   1    2.77    0.50 
   0 -23   1    2.63    0.44 
   0 -23  -1    1.48    0.35 
   0  23   1    2.58    0.52 
   0  23  -1    2.30    0.47 
  -1 -23  -1    1.22    0.32 
   1 -23   1    0.94    0.32 
  -1 -23  -1    0.56    0.26 
  -1 -23  -1    1.51    0.41 
   1 -23   1    1.18    0.30 
   1 -23   1    1.46    0.25 
  -1  23  -1    0.85    0.32 
   1  23   1    1.46    0.45 
  -2 -23  -1    0.74    0.26 
   2 -23   1    0.40    0.28 
   2 -23   1    0.73    0.19 
  -2 -23  -1    0.80    0.30 
  -2 -23  -1    1.02    0.33 
  -2  23  -1    0.64    0.29 
   2  23   1    0.72    0.32 
  -3 -23  -1    3.76    0.65 
  -3 -23  -1    2.02    0.43 
   3 -23   1    2.95    0.54 
   3 -23   1    2.50    0.29 
  -3 -23  -1    2.93    0.48 
  -3  23  -1    1.80    0.41 
   3  23   1    3.73    0.66 
  -4 -23  -1    1.85    0.46 
  -4 -23  -1    2.00    0.38 
   4 -23   1    1.06    0.37 
   4 -23   1    1.87    0.25 
  -4 -23  -1    0.92    0.38 
   4  23   1    1.53    0.46 
  -5 -23  -1   18.52    1.03 
   5 -23   1   15.79    1.17 
  -5 -23  -1   19.64    1.23 
  -5 -23  -1   16.30    1.19 
   5 -23   1   17.40    0.75 
   5  23   1   15.68    1.22 
   6 -23   1    2.85    0.33 
  -6 -23  -1    3.80    0.66 
   6 -23   1    2.89    0.60 
  -6 -23  -1    2.23    0.57 
  -6 -23  -1    2.62    0.48 
   6  23   1    2.30    0.59 
  -7 -23  -1    0.25    0.27 
   7 -23   1   -0.22    0.12 
  -7 -23  -1   -0.08    0.19 
   7 -23   1   -0.03    0.26 
  -7 -23  -1    0.17    0.31 
   7  23   1   -0.19    0.26 
  -7 -24   1    0.09    0.21 
   7 -24  -1    0.14    0.20 
   7 -24  -1    0.24    0.29 
  -7 -24   1    0.18    0.27 
  -7 -24   1    0.52    0.37 
   7  24  -1   -0.04    0.25 
  -6 -24   1    3.74    0.60 
  -6 -24   1    3.72    0.51 
  -6 -24   1    3.23    0.62 
   6 -24  -1    4.06    0.70 
   6 -24  -1    3.54    0.48 
  -6  24   1    3.41    0.64 
   6  24  -1    3.49    0.72 
   5 -24  -1   -0.09    0.21 
  -5 -24   1    0.05    0.20 
   5 -24  -1    0.21    0.19 
  -5 -24   1    0.23    0.30 
  -5 -24   1   -0.07    0.16 
   5  24  -1    0.16    0.29 
  -5  24   1    0.00    0.23 
   4 -24  -1    1.68    0.34 
  -4 -24   1    1.90    0.47 
  -4 -24   1    2.45    0.46 
   4 -24  -1    2.45    0.54 
   4 -24  -1    2.09    0.41 
   4  24  -1    1.79    0.48 
  -4  24   1    1.60    0.43 
  -3 -24   1    0.82    0.32 
   3 -24  -1    0.52    0.23 
   3 -24  -1    0.47    0.29 
  -3 -24   1    0.95    0.29 
   3 -24  -1    0.92    0.30 
  -3  24   1    0.74    0.35 
   3  24  -1    1.18    0.41 
   2 -24  -1    0.10    0.22 
  -2 -24   1    0.05    0.15 
   2 -24  -1    0.48    0.23 
   2 -24  -1    0.44    0.26 
  -2 -24   1    0.32    0.22 
  -2 -24   1    0.42    0.24 
   2  24  -1    0.07    0.23 
  -2  24   1    0.61    0.31 
  -1 -24   1   10.95    0.83 
   1 -24  -1    9.42    0.74 
   1 -24  -1    8.83    0.91 
  -1 -24   1    9.47    0.65 
   1 -24  -1    9.51    0.71 
  -1 -24   1   12.15    0.82 
   1  24  -1   10.10    1.01 
  -1  24   1   10.26    1.03 
   0 -24   1    0.23    0.14 
   0 -24  -1    0.16    0.21 
   0 -24  -1    0.20    0.21 
   0 -24   1    0.44    0.24 
   0 -24  -1    0.30    0.24 
   0 -24   1    0.39    0.24 
   0  24  -1   -0.17    0.20 
   0  24   1    0.00    0.22 
  -1 -24  -1    0.66    0.29 
  -1 -24  -1    1.11    0.31 
   1 -24   1    1.18    0.38 
   1 -24   1    0.89    0.21 
  -1 -24  -1    0.69    0.28 
   1  24   1    0.74    0.34 
  -1  24  -1    0.98    0.35 
  -2 -24  -1    2.56    0.46 
   2 -24   1    1.25    0.22 
   2 -24   1    1.69    0.42 
  -2 -24  -1    1.46    0.38 
  -2 -24  -1    0.78    0.34 
   2  24   1    0.95    0.41 
  -2  24  -1    1.92    0.44 
  -3 -24  -1    1.38    0.41 
   3 -24   1    1.96    0.51 
  -3 -24  -1    2.81    0.51 
   3 -24   1    1.96    0.25 
   3  24   1    1.95    0.51 
   4 -24   1    0.12    0.11 
  -4 -24  -1    0.10    0.23 
  -4 -24  -1   -0.02    0.23 
   4 -24   1   -0.16    0.21 
   4  24   1   -0.03    0.26 
  -5 -24  -1    3.34    0.64 
   5 -24   1    2.90    0.27 
   5 -24   1    2.91    0.63 
  -5 -24  -1    2.60    0.45 
  -5 -24  -1    2.69    0.55 
   5  24   1    2.24    0.58 
  -6 -24  -1    0.75    0.33 
  -6 -24  -1    0.66    0.35 
  -6 -24  -1    1.10    0.34 
   6 -24   1    0.98    0.39 
   6 -24   1    0.66    0.18 
   6  24   1    0.41    0.37 
  -7 -24  -1    1.03    0.37 
   7 -24   1    1.04    0.44 
   7 -24   1    1.04    0.21 
  -7 -24  -1    1.27    0.45 
   7  24   1    1.26    0.49 
   6 -25  -1    0.51    0.37 
  -6 -25   1    0.61    0.36 
  -6 -25   1    0.96    0.37 
  -6 -25   1    0.79    0.28 
   6 -25  -1    0.09    0.19 
   6  25  -1    0.58    0.37 
   5 -25  -1    9.10    1.09 
   5 -25  -1   10.37    0.70 
  -5 -25   1    9.86    1.06 
  -5 -25   1   10.14    0.84 
  -5  25   1   12.10    0.98 
   5  25  -1    9.47    1.10 
   4 -25  -1    2.94    0.45 
  -4 -25   1    2.25    0.45 
   4 -25  -1    3.20    0.61 
  -4 -25   1    3.01    0.58 
   4  25  -1    2.46    0.58 
  -4  25   1    3.02    0.58 
   3 -25  -1   -0.05    0.20 
  -3 -25   1   -0.17    0.19 
   3 -25  -1    0.07    0.16 
  -3 -25   1    0.06    0.17 
   3 -25  -1    0.06    0.23 
  -3  25   1   -0.05    0.25 
   3  25  -1   -0.02    0.25 
  -2 -25   1    1.15    0.29 
   2 -25  -1    1.18    0.30 
   2 -25  -1    1.07    0.35 
   2 -25  -1    0.61    0.28 
  -2 -25   1    1.15    0.36 
  -2 -25   1    1.22    0.38 
  -2  25   1    1.12    0.38 
   2  25  -1    0.90    0.40 
   1 -25  -1    3.59    0.58 
   1 -25  -1    2.94    0.54 
  -1 -25   1    3.99    0.61 
  -1 -25   1    3.74    0.48 
   1 -25  -1    3.47    0.51 
  -1 -25   1    3.79    0.57 
   1  25  -1    4.44    0.69 
  -1  25   1    3.52    0.63 
   0 -25   1    3.36    0.50 
   0 -25  -1    1.70    0.41 
   0 -25   1    3.79    0.59 
   0 -25  -1    3.50    0.58 
   0 -25  -1    3.45    0.50 
   0 -25   1    3.18    0.41 
   0  25   1    2.73    0.57 
   0  25  -1    2.96    0.56 
   1 -25   1    6.05    0.80 
  -1 -25  -1    4.85    0.67 
  -1 -25  -1    5.25    0.65 
  -1 -25  -1    5.51    0.70 
   1 -25   1    4.75    0.46 
  -1  25  -1    5.49    0.75 
   1  25   1    4.93    0.78 
  -2 -25  -1    0.57    0.27 
  -2 -25  -1    0.35    0.23 
  -2 -25  -1    0.57    0.32 
   2 -25   1    0.26    0.13 
   2 -25   1    0.15    0.23 
   2  25   1    0.40    0.31 
   3 -25   1    0.51    0.13 
  -3 -25  -1    1.21    0.39 
   3 -25   1    0.66    0.34 
  -3 -25  -1    0.05    0.22 
   3  25   1    0.66    0.36 
  -4 -25  -1   -0.03    0.19 
  -4 -25  -1    0.17    0.29 
   4 -25   1    0.40    0.28 
   4  25   1    0.06    0.30 
  -5 -25  -1    0.14    0.29 
  -5 -25  -1    0.56    0.31 
   5 -25   1    0.28    0.32 
   5  25   1    0.55    0.36 
  -6 -25  -1   16.96    1.21 
   6 -25   1   16.04    1.25 
  -6 -25  -1   17.23    1.31 
  -6 -25  -1   17.50    1.04 
   6  25   1   13.02    1.37 
  -5 -26   1    1.62    0.49 
   5 -26  -1    2.55    0.41 
   5 -26  -1    1.86    0.52 
  -5 -26   1    2.26    0.47 
   5  26  -1    2.27    0.63 
  -4 -26   1    1.34    0.35 
  -4 -26   1    1.19    0.41 
   4 -26  -1    1.88    0.37 
   4 -26  -1    0.52    0.30 
   4  26  -1    1.32    0.47 
  -4  26   1    0.91    0.40 
   3 -26  -1    0.95    0.37 
   3 -26  -1    1.22    0.31 
  -3 -26   1    1.35    0.41 
  -3 -26   1    0.87    0.28 
  -3  26   1    0.95    0.38 
   3  26  -1    0.87    0.38 
   2 -26  -1    4.64    0.57 
  -2 -26   1    4.47    0.66 
  -2 -26   1    5.44    0.71 
  -2 -26   1    4.66    0.57 
   2 -26  -1    5.67    0.79 
   2 -26  -1    4.61    0.63 
  -2  26   1    5.04    0.78 
   2  26  -1    5.31    0.77 
  -1 -26   1    4.52    0.67 
   1 -26  -1    5.71    0.78 
  -1 -26   1    5.22    0.56 
   1 -26  -1    5.03    0.66 
   1 -26  -1    4.69    0.58 
  -1 -26   1    6.27    0.75 
   1  26  -1    5.20    0.76 
  -1  26   1    4.56    0.72 
   0 -26   1    0.15    0.14 
   0 -26   1   -0.30    0.14 
   0 -26  -1    0.38    0.23 
   0 -26  -1   -0.08    0.18 
   0 -26  -1   -0.07    0.24 
   0  26  -1   -0.02    0.23 
   0  26   1    0.41    0.29 
  -1 -26  -1    1.21    0.35 
   1 -26   1    0.39    0.32 
  -1 -26  -1    0.40    0.25 
   1 -26   1    0.63    0.18 
  -1 -26  -1    1.09    0.37 
   1  26   1    0.26    0.29 
  -2 -26  -1    0.36    0.25 
  -2 -26  -1    0.23    0.25 
   2 -26   1    0.08    0.26 
  -2 -26  -1    0.23    0.29 
   2 -26   1    0.51    0.15 
   2  26   1    0.25    0.30 
   3 -26   1    0.01    0.25 
  -3 -26  -1   -0.11    0.19 
  -3 -26  -1   -0.07    0.22 
   3  26   1   -0.38    0.24 
  -4 -26  -1    3.07    0.56 
   4 -26   1    2.40    0.57 
  -4 -26  -1    3.51    0.66 
   4  26   1    4.55    0.79 
   5 -26   1    0.31    0.29 
  -5 -26  -1    0.15    0.24 
  -5 -26  -1    0.90    0.42 
   5  26   1    0.33    0.37 
  -5 -27   1    3.33    0.64 
   5 -27  -1    1.86    0.34 
  -5 -27   1    1.60    0.40 
   5  27  -1    2.54    0.63 
   4 -27  -1    3.62    0.47 
  -4 -27   1    3.57    0.55 
   4 -27  -1    2.81    0.60 
  -4 -27   1    3.31    0.64 
   4  27  -1    3.59    0.70 
  -3 -27   1    0.35    0.23 
   3 -27  -1    0.47    0.22 
  -3 -27   1    0.43    0.31 
   3 -27  -1    0.24    0.27 
   3  27  -1    0.44    0.33 
  -3  27   1    0.37    0.35 
   2 -27  -1    1.05    0.29 
   2 -27  -1    1.65    0.46 
  -2 -27   1    1.52    0.35 
  -2 -27   1    0.72    0.35 
  -2 -27   1    0.92    0.36 
  -2  27   1    1.57    0.46 
   2  27  -1    1.61    0.45 
  -1 -27   1    0.58    0.31 
  -1 -27   1    0.66    0.32 
   1 -27  -1    0.70    0.32 
   1 -27  -1    0.66    0.28 
   1 -27  -1    0.58    0.31 
  -1 -27   1    0.85    0.24 
  -1  27   1    1.36    0.46 
   0 -27   1    6.37    0.81 
   0 -27   1    6.11    0.47 
   0 -27  -1    5.30    0.76 
   0 -27  -1    6.68    0.80 
   0 -27  -1    5.56    0.66 
   0  27   1    5.68    0.85 
   1 -27   1    0.26    0.14 
  -1 -27  -1    0.09    0.21 
  -1 -27  -1    0.24    0.27 
  -1 -27  -1    0.15    0.26 
   1 -27   1    0.15    0.27 
   1  27   1   -0.28    0.21 
  -2 -27  -1    0.04    0.23 
  -2 -27  -1    0.29    0.24 
  -2 -27  -1    0.30    0.33 
   2 -27   1    0.22    0.11 
   2 -27   1    0.08    0.26 
   2  27   1    0.22    0.33 
  -3 -27  -1    0.39    0.32 
  -3 -27  -1    0.17    0.24 
   3 -27   1   -0.04    0.29 
   3  27   1   -0.03    0.30 
  -4 -27  -1    3.67    0.63 
   4 -27   1    2.81    0.64 
  -4 -27  -1    4.32    0.73 
   4  27   1    4.32    0.80 
  -5 -27  -1    0.34    0.33 
  -5 -27  -1    0.35    0.28 
   5  27   1    0.58    0.41 
  -4 -28   1    0.61    0.29 
   4 -28  -1    0.39    0.23 
  -4 -28   1    0.42    0.36 
   4  28  -1    0.36    0.33 
   3 -28  -1    0.50    0.33 
   3 -28  -1    0.07    0.17 
  -3 -28   1    0.33    0.30 
  -3 -28   1    0.29    0.23 
   3  28  -1    0.33    0.37 
   2 -28  -1   12.53    1.21 
   2 -28  -1   12.87    0.81 
  -2 -28   1   13.10    0.82 
  -2 -28   1   12.85    0.97 
  -2  28   1   10.11    1.15 
  -1 -28   1    8.30    0.60 
  -1 -28   1    8.14    0.94 
   1 -28  -1    8.00    0.65 
   1 -28  -1    8.32    0.96 
  -1  28   1    5.98    0.87 
   0 -28  -1   -0.02    0.25 
   0 -28   1    0.24    0.28 
   0 -28  -1    0.29    0.22 
   0 -28   1    0.04    0.13 
   0 -28  -1    0.12    0.22 
   0  28   1    0.01    0.30 
   1 -28   1    9.06    1.05 
  -1 -28  -1    9.03    1.00 
  -1 -28  -1    9.01    0.88 
   1 -28   1    8.56    0.49 
  -1 -28  -1    7.96    0.93 
   1  28   1    6.94    0.95 
   2 -28   1    0.51    0.35 
  -2 -28  -1    0.37    0.32 
  -2 -28  -1    0.29    0.25 
   2  28   1    0.26    0.31 
  -3 -28  -1    6.34    0.79 
  -3 -28  -1    7.24    0.94 
   3 -28   1    6.91    0.94 
   3  28   1    8.55    1.11 
  -4 -28  -1    0.62    0.33 
  -4 -28  -1    0.31    0.31 
   4  28   1    0.80    0.42 
  -2 -29   1    5.93    0.62 
   2 -29  -1    4.48    0.75 
   2 -29  -1    6.40    0.64 
  -1 -29   1    1.73    0.32 
   1 -29  -1    1.78    0.49 
   1 -29  -1    1.58    0.36 
  -1 -29   1    1.64    0.49 
  -1  29   1    1.62    0.52 
   0 -29   1    0.46    0.32 
   0 -29   1    0.33    0.16 
   0 -29  -1   -0.18    0.17 
   0 -29  -1    0.15    0.27 
   0  29   1    0.18    0.32 
  -1 -29  -1    0.86    0.38 
   1 -29   1    1.26    0.43 
   1 -29   1    1.48    0.21 
  -1 -29  -1    1.17    0.44 
  -1 -29  -1    1.26    0.35 
   1  29   1    0.60    0.40 
  -2 -29  -1    0.58    0.35 
  -2 -29  -1    0.29    0.25 
   2 -29   1    0.16    0.31 
   2  29   1    0.08    0.33 
  12   0  -2    1.12    0.32 
  11   0  -2    0.10    0.17 
  10   0  -2    1.83    0.36 
  10   0  -2    1.66    0.35 
  10   0  -2    1.56    0.41 
 -10   0   2    1.95    0.41 
   9   0  -2   -0.11    0.14 
  -9   0   2    0.06    0.14 
  -9   0   2    0.02    0.15 
   9   0  -2    0.11    0.15 
   9   0  -2   -0.11    0.12 
   8   0  -2    1.30    0.28 
   8   0  -2    1.84    0.37 
  -8   0   2    1.54    0.28 
  -8   0   2    1.35    0.30 
   8   0  -2    1.34    0.27 
   7   0  -2    0.10    0.12 
  -7   0   2    0.07    0.12 
  -7   0   2    0.01    0.09 
   7   0  -2    0.05    0.11 
   7   0  -2    0.03    0.13 
  -6   0   2   18.14    0.86 
   6   0  -2   17.99    0.82 
   6   0  -2   19.78    0.87 
  -6   0   2   18.37    0.88 
   6   0  -2   18.23    0.92 
   6   0  -2   18.09    0.66 
  -6   0   2   18.28    0.80 
   5   0  -2    0.00    0.05 
  -5   0   2   -0.06    0.07 
   5   0  -2    0.01    0.08 
  -5   0   2    0.02    0.08 
   5   0  -2    0.00    0.08 
   5   0  -2    0.02    0.09 
  -5   0   2   -0.06    0.07 
   4   0  -2    4.86    0.34 
   4   0  -2    4.51    0.29 
  -4   0   2    4.51    0.31 
  -4   0   2    4.05    0.26 
   4   0  -2    4.47    0.30 
   4   0  -2    3.99    0.21 
  -4   0   2    4.25    0.31 
  -3   0   2   -0.04    0.05 
   3   0  -2    0.00    0.04 
   3   0  -2    0.01    0.06 
   3   0  -2   -0.03    0.03 
  -3   0   2   -0.05    0.03 
   3   0  -2   -0.02    0.04 
  -3   0   2    0.02    0.06 
  -2   0   2   12.19    0.48 
   2   0  -2   12.25    0.46 
   2   0  -2   10.86    0.48 
  -2   0   2   11.73    0.46 
   2   0  -2   12.04    0.45 
   1   0  -2   -0.01    0.02 
  -1   0   2    0.35    0.06 
  -1   0   2    0.03    0.04 
   1   0  -2    0.12    0.04 
   0   0   2    5.28    0.22 
   0   0   2    3.56    0.22 
   0   0   2    5.19    0.22 
   0   0  -2    4.65    0.22 
   0   0   2    4.87    0.20 
   0   0  -2    5.30    0.22 
   1   0   2   -0.04    0.04 
  -1   0  -2   -0.04    0.04 
   1   0   2   -0.04    0.03 
   1   0   2   -0.11    0.03 
   1   0   2   -0.07    0.04 
  -1   0  -2   -0.07    0.03 
   1   0   2   -0.05    0.04 
  -2   0  -2    0.53    0.14 
   2   0   2    0.71    0.19 
   2   0   2    0.35    0.14 
   2   0   2    0.28    0.12 
  -2   0  -2    0.60    0.16 
   2   0   2    0.23    0.13 
   2   0   2    0.52    0.15 
   3   0   2   -0.02    0.05 
  -3   0  -2    0.08    0.07 
   3   0   2   -0.01    0.06 
  -3   0  -2   -0.05    0.05 
   3   0   2    0.08    0.07 
  -4   0  -2   36.35    1.38 
  -4   0  -2   37.41    1.36 
   4   0   2   35.65    1.38 
   4   0   2   37.09    1.39 
   4   0   2   37.67    1.38 
  -5   0  -2    0.01    0.09 
  -5   0  -2   -0.02    0.08 
  -5   0  -2    0.02    0.09 
   5   0   2    0.07    0.10 
   5   0   2   -0.09    0.08 
   5   0   2    0.11    0.09 
   6   0   2   27.49    1.23 
  -6   0  -2   28.26    1.20 
   6   0   2   29.05    1.24 
  -6   0  -2   26.91    1.18 
   6   0   2   28.13    1.22 
   7   0   2   -0.19    0.11 
  -7   0  -2   -0.08    0.12 
   7   0   2    0.12    0.14 
   7   0   2    0.02    0.13 
  -7   0  -2    0.13    0.16 
   8   0   2    0.70    0.26 
   8   0   2    0.57    0.25 
  -8   0  -2    0.33    0.20 
  -8   0  -2    0.43    0.22 
   8   0   2    0.65    0.24 
   9   0   2    0.10    0.17 
   9   0   2    0.01    0.18 
  -9   0  -2    0.15    0.18 
   9   0   2    0.04    0.17 
  10   0   2    0.78    0.29 
  10   0   2    0.67    0.29 
  10   0   2    0.52    0.26 
 -10   0  -2    0.42    0.23 
 -11   0  -2   -0.16    0.19 
  11   0   2   -0.16    0.18 
  11   0   2    0.03    0.22 
  11   0   2    0.14    0.22 
  12  -1  -2    6.16    0.70 
  12   1  -2    6.13    0.73 
  11  -1  -2    1.70    0.37 
  11  -1  -2    1.07    0.31 
  11   1  -2    1.66    0.38 
  11   1  -2    1.71    0.45 
 -10  -1   2    2.63    0.49 
 -10  -1   2    1.45    0.32 
  10  -1  -2    2.66    0.41 
  10  -1  -2    2.03    0.40 
  10   1  -2    1.59    0.36 
 -10   1   2    2.34    0.43 
  10   1  -2    2.58    0.51 
   9  -1  -2    0.35    0.18 
   9  -1  -2    0.22    0.18 
  -9  -1   2    0.16    0.15 
  -9  -1   2    0.13    0.17 
   9  -1  -2    0.41    0.26 
   9   1  -2    0.31    0.18 
   9   1  -2    0.46    0.22 
  -9   1   2    0.47    0.22 
   9   1  -2    0.55    0.22 
  -8  -1   2    1.77    0.31 
   8  -1  -2    1.03    0.26 
   8  -1  -2    1.94    0.33 
   8  -1  -2    1.46    0.33 
  -8  -1   2    1.44    0.32 
  -8   1   2    2.14    0.37 
  -8   1   2    1.55    0.28 
   8   1  -2    1.35    0.29 
   8   1  -2    1.42    0.35 
   8   1  -2    2.08    0.36 
  -7  -1   2    4.37    0.50 
   7  -1  -2    4.80    0.50 
   7  -1  -2    5.02    0.48 
   7  -1  -2    4.79    0.54 
  -7  -1   2    4.86    0.47 
  -7   1   2    3.88    0.40 
  -7   1   2    4.68    0.51 
   7   1  -2    4.72    0.48 
   7   1  -2    4.50    0.55 
   7   1  -2    4.88    0.49 
   6  -1  -2    4.22    0.34 
   6  -1  -2    4.45    0.27 
  -6  -1   2    4.42    0.34 
   6  -1  -2    3.87    0.45 
  -6  -1   2    4.45    0.46 
  -6  -1   2    5.24    0.49 
   6  -1  -2    4.78    0.37 
   6   1  -2    4.42    0.36 
  -6   1   2    4.22    0.43 
  -6   1   2    4.44    0.33 
  -6   1   2    4.88    0.38 
   6   1  -2    4.80    0.52 
   6   1  -2    5.65    0.41 
   5  -1  -2    9.39    0.49 
  -5  -1   2    9.81    0.55 
   5  -1  -2    9.56    0.57 
  -5  -1   2    9.40    0.53 
   5  -1  -2    9.55    0.41 
   5  -1  -2   11.07    0.55 
  -5  -1   2    9.23    0.49 
  -5   1   2    9.76    0.48 
  -5   1   2    9.20    0.52 
   5   1  -2   10.39    0.55 
   5   1  -2    9.92    0.51 
  -5   1   2    9.33    0.53 
   5   1  -2    9.46    0.36 
  -4  -1   2   15.74    0.72 
   4  -1  -2   16.69    0.75 
   4  -1  -2   17.59    0.71 
  -4  -1   2   15.91    0.67 
   4  -1  -2   15.84    0.60 
   4  -1  -2   17.16    0.68 
  -4  -1   2   17.54    0.73 
  -4   1   2   17.60    0.72 
  -4   1   2   16.15    0.71 
   4   1  -2   15.87    0.70 
   4   1  -2   16.69    0.55 
   4   1  -2   17.74    0.78 
  -4   1   2   16.77    0.66 
   4   1  -2   17.03    0.69 
   3  -1  -2    0.31    0.07 
   3  -1  -2    0.55    0.11 
  -3  -1   2    0.24    0.08 
   3  -1  -2    0.40    0.09 
   3  -1  -2    0.39    0.11 
  -3  -1   2    0.44    0.10 
  -3  -1   2    0.33    0.09 
   3   1  -2    0.44    0.10 
   3   1  -2    0.31    0.11 
   3   1  -2    0.24    0.08 
  -3   1   2    0.30    0.09 
  -3   1   2    0.37    0.10 
  -2  -1   2  258.74    7.55 
  -2  -1   2  253.58    7.57 
   2  -1  -2  258.56    7.52 
   2  -1  -2  263.68    7.54 
   2   1  -2  261.20    7.55 
   2   1  -2  250.80    7.58 
  -2   1   2  253.86    7.54 
   2   1  -2  250.74    7.52 
  -2   1   2  256.49    7.56 
  -1  -1   2  470.54   13.70 
  -1  -1   2  451.70   13.86 
   1  -1  -2  466.28   14.09 
   1  -1  -2  448.51   14.01 
  -1   1   2  453.61   13.92 
  -1   1   2  465.56   14.02 
   1   1  -2  446.32   13.65 
   1   1  -2  468.52   13.87 
   1   1  -2  463.12   13.93 
   0  -1   2    5.03    0.21 
   0  -1  -2    4.74    0.22 
   0  -1   2    4.50    0.18 
   0  -1   2    4.48    0.19 
   0  -1   2    4.94    0.20 
   0  -1  -2    4.82    0.22 
   0   1  -2    4.47    0.19 
   0   1   2    4.88    0.23 
   0   1   2    4.38    0.22 
   0   1   2    5.04    0.21 
   1  -1   2   56.21    1.68 
  -1  -1  -2   52.49    1.76 
  -1  -1  -2   53.51    1.75 
   1  -1   2   56.17    1.73 
   1  -1   2   55.16    1.72 
   1  -1   2   55.86    1.72 
  -1   1  -2   57.01    1.71 
   1   1   2   54.03    1.76 
   1   1   2   56.76    1.77 
   1   1   2   53.62    1.76 
   1   1   2   56.51    1.73 
   2  -1   2    0.17    0.07 
  -2  -1  -2    0.06    0.07 
   2  -1   2    0.11    0.08 
   2  -1   2    0.06    0.07 
   2  -1   2    0.11    0.07 
  -2  -1  -2    0.10    0.08 
   2   1   2    0.23    0.10 
   2   1   2    0.14    0.08 
  -2   1  -2    0.17    0.07 
   2   1   2    0.18    0.10 
   2   1   2    0.15    0.07 
   3  -1   2   10.23    0.50 
  -3  -1  -2   10.46    0.52 
   3  -1   2   10.84    0.54 
  -3  -1  -2   10.70    0.54 
   3  -1   2   10.14    0.50 
   3  -1   2   10.74    0.49 
   3   1   2   10.39    0.54 
   3   1   2   10.11    0.53 
  -3   1  -2    9.69    0.49 
   3   1   2    9.24    0.50 
  -3   1  -2   10.58    0.48 
  -4  -1  -2   21.73    0.93 
   4  -1   2   20.95    0.89 
   4  -1   2   20.67    0.90 
  -4  -1  -2   20.58    0.90 
   4  -1   2   23.33    0.92 
   4   1   2   21.87    0.94 
  -4   1  -2   22.32    0.88 
  -4   1  -2   20.38    0.88 
   4   1   2   20.97    0.92 
   4   1   2   20.36    0.93 
  -5  -1  -2    5.21    0.41 
  -5  -1  -2    5.48    0.42 
   5  -1   2    6.57    0.45 
   5  -1   2    7.14    0.46 
   5  -1   2    5.66    0.42 
  -5  -1  -2    6.26    0.46 
  -5   1  -2    6.44    0.42 
   5   1   2    5.76    0.45 
  -5   1  -2    5.69    0.41 
   5   1   2    6.63    0.47 
   5   1   2    6.24    0.46 
  -5   1  -2    5.60    0.42 
  -6  -1  -2    0.12    0.13 
   6  -1   2    0.15    0.11 
   6  -1   2    0.01    0.11 
   6  -1   2   -0.02    0.10 
  -6  -1  -2    0.15    0.13 
   6   1   2    0.31    0.16 
   6   1   2    0.05    0.14 
  -6   1  -2    0.04    0.11 
   6   1   2    0.01    0.10 
  -6   1  -2    0.07    0.12 
  -7  -1  -2    1.77    0.32 
   7  -1   2    1.46    0.34 
  -7  -1  -2    1.82    0.34 
   7  -1   2    1.83    0.32 
   7  -1   2    1.85    0.34 
   7   1   2    1.68    0.32 
  -7   1  -2    1.75    0.32 
   7   1   2    1.60    0.33 
   7   1   2    1.25    0.29 
  -7   1  -2    2.08    0.33 
   8  -1   2    1.73    0.33 
  -8  -1  -2    2.23    0.39 
  -8  -1  -2    1.74    0.34 
   8  -1   2    1.86    0.38 
   8  -1   2    2.02    0.35 
   8   1   2    1.49    0.35 
  -8   1  -2    2.06    0.37 
  -8   1  -2    2.11    0.35 
   8   1   2    1.98    0.38 
   8   1   2    1.67    0.35 
   9  -1   2    4.32    0.59 
   9  -1   2    3.52    0.50 
   9  -1   2    4.23    0.55 
  -9  -1  -2    3.93    0.54 
  -9  -1  -2    4.58    0.56 
   9   1   2    4.62    0.63 
   9   1   2    4.93    0.62 
   9   1   2    4.13    0.55 
  -9   1  -2    4.16    0.52 
  10  -1   2    6.37    0.69 
 -10  -1  -2    7.97    0.77 
  10  -1   2    7.17    0.84 
  10  -1   2    7.14    0.76 
  10   1   2    7.02    0.76 
  10   1   2    7.99    0.89 
  10   1   2    6.12    0.71 
 -10   1  -2    5.91    0.64 
 -11  -1  -2    0.78    0.29 
  11  -1   2    0.73    0.28 
  11  -1   2    0.56    0.30 
  11  -1   2    0.49    0.28 
 -11   1  -2    0.47    0.25 
  11   1   2    0.83    0.36 
  11   1   2    0.82    0.34 
  11   1   2    0.55    0.29 
  12  -2  -2   -0.09    0.18 
  12   2  -2    0.04    0.21 
  12   2  -2   -0.24    0.22 
  11  -2  -2   -0.09    0.15 
 -11  -2   2   -0.05    0.19 
  11  -2  -2    0.08    0.15 
  11   2  -2   -0.10    0.18 
  11   2  -2    0.17    0.18 
  10  -2  -2    0.33    0.20 
 -10  -2   2    0.10    0.19 
 -10  -2   2    0.17    0.20 
  10  -2  -2    0.26    0.19 
  10   2  -2   -0.07    0.13 
  10   2  -2    0.50    0.26 
   9  -2  -2    3.96    0.52 
   9  -2  -2    3.15    0.42 
  -9  -2   2    3.28    0.51 
  -9  -2   2    3.45    0.44 
   9   2  -2    3.35    0.46 
   9   2  -2    3.23    0.54 
   9   2  -2    2.55    0.42 
  -9   2   2    3.19    0.47 
   8  -2  -2    2.24    0.42 
   8  -2  -2    2.14    0.34 
   8  -2  -2    1.71    0.32 
  -8  -2   2    1.44    0.31 
  -8  -2   2    1.93    0.33 
  -8   2   2    1.68    0.32 
   8   2  -2    2.00    0.35 
   8   2  -2    2.17    0.35 
   8   2  -2    2.12    0.41 
   7  -2  -2   49.89    1.98 
  -7  -2   2   51.64    1.86 
  -7  -2   2   54.57    1.96 
  -7  -2   2   50.15    1.95 
   7  -2  -2   51.77    1.85 
   7  -2  -2   50.90    1.88 
  -7   2   2   52.72    1.81 
   7   2  -2   47.37    1.99 
   7   2  -2   49.15    1.91 
   7   2  -2   51.37    1.88 
  -7   2   2   49.41    1.90 
   6  -2  -2    1.12    0.24 
   6  -2  -2    1.50    0.26 
  -6  -2   2    1.34    0.23 
   6  -2  -2    1.47    0.19 
  -6  -2   2    1.66    0.29 
  -6  -2   2    1.86    0.32 
   6  -2  -2    1.22    0.21 
  -6   2   2    2.00    0.30 
   6   2  -2    1.27    0.25 
  -6   2   2    1.94    0.29 
   6   2  -2    1.38    0.24 
   6   2  -2    1.17    0.25 
  -6   2   2    1.72    0.24 
  -5  -2   2    9.55    0.55 
   5  -2  -2    8.58    0.48 
   5  -2  -2    9.20    0.43 
  -5  -2   2    9.05    0.53 
  -5  -2   2    9.58    0.50 
   5  -2  -2    9.20    0.55 
   5  -2  -2    9.03    0.50 
  -5   2   2    9.82    0.47 
  -5   2   2    9.85    0.52 
  -5   2   2   10.55    0.55 
   5   2  -2    9.49    0.51 
   5   2  -2    9.33    0.53 
   5   2  -2    9.34    0.58 
  -4  -2   2   37.36    1.30 
   4  -2  -2   37.06    1.22 
   4  -2  -2   37.64    1.28 
   4  -2  -2   34.72    1.35 
   4  -2  -2   36.07    1.29 
  -4  -2   2   37.98    1.35 
  -4  -2   2   37.24    1.35 
   4   2  -2   35.58    1.11 
   4   2  -2   37.36    1.30 
  -4   2   2   37.53    1.30 
   4   2  -2   38.41    1.34 
   4   2  -2   36.26    1.38 
  -4   2   2   37.63    1.32 
  -3  -2   2   78.49    2.43 
   3  -2  -2   75.92    2.38 
  -3  -2   2   75.96    2.48 
   3  -2  -2   76.67    2.43 
   3  -2  -2   78.31    2.41 
  -3  -2   2   78.24    2.47 
  -3   2   2   77.56    2.45 
   3   2  -2   77.00    2.46 
   3   2  -2   80.50    2.52 
   3   2  -2   78.65    2.43 
  -3   2   2   78.80    2.44 
   2  -2  -2  102.39    3.08 
  -2  -2   2   99.84    3.10 
   2  -2  -2   99.80    3.06 
  -2  -2   2  104.60    3.11 
  -2   2   2  104.63    3.08 
   2   2  -2  105.47    3.10 
   2   2  -2   99.73    3.06 
   2   2  -2  104.24    3.13 
  -2   2   2   96.75    3.09 
  -1  -2   2  140.42    4.10 
  -1  -2   2  136.72    4.11 
  -1  -2   2  137.98    4.10 
   1  -2  -2  139.25    4.11 
   1  -2  -2  136.73    4.10 
  -1   2   2  139.31    4.12 
   1   2  -2  138.09    4.10 
   1   2  -2  138.19    4.08 
  -1   2   2  140.78    4.13 
   1   2  -2  141.17    4.12 
   0  -2   2   34.05    1.02 
   0  -2   2   33.95    1.02 
   0  -2   2   34.76    1.02 
   0  -2  -2   34.31    1.10 
   0  -2  -2   33.87    1.09 
   0  -2   2   32.53    1.02 
   0   2  -2   33.48    1.02 
   0   2   2   33.80    1.09 
   0   2   2   34.00    1.11 
   0   2   2   33.25    1.10 
   1  -2   2    2.14    0.14 
   1  -2   2    2.31    0.14 
   1  -2   2    2.10    0.14 
   1  -2   2    2.35    0.12 
   1  -2   2    2.18    0.14 
  -1  -2  -2    2.05    0.20 
  -1  -2  -2    2.38    0.19 
   1   2   2    2.65    0.25 
   1   2   2    1.95    0.21 
   1   2   2    2.18    0.17 
  -1   2  -2    2.14    0.12 
   1   2   2    2.91    0.26 
  -2  -2  -2   64.90    2.06 
   2  -2   2   63.84    1.97 
  -2  -2  -2   61.49    2.07 
   2  -2   2   61.14    1.97 
   2  -2   2   60.94    1.94 
   2  -2   2   59.39    1.98 
   2   2   2   62.79    2.03 
   2   2   2   63.78    2.07 
  -2   2  -2   62.51    1.93 
   2   2   2   61.55    2.06 
   2   2   2   63.94    2.06 
   3  -2   2    0.02    0.06 
   3  -2   2    0.12    0.07 
  -3  -2  -2    0.04    0.07 
  -3  -2  -2    0.02    0.06 
   3  -2   2    0.00    0.05 
   3  -2   2    0.00    0.05 
   3   2   2    1.00    0.19 
  -3   2  -2   -0.02    0.04 
   3   2   2    0.05    0.07 
   3   2   2    0.08    0.09 
   4  -2   2   12.19    0.64 
   4  -2   2   11.65    0.60 
  -4  -2  -2   12.26    0.64 
   4  -2   2   12.81    0.61 
   4  -2   2   12.84    0.61 
  -4  -2  -2   13.85    0.69 
  -4   2  -2   12.60    0.66 
   4   2   2   12.71    0.67 
   4   2   2   12.98    0.67 
  -4   2  -2   12.28    0.57 
   4   2   2   12.32    0.65 
   5  -2   2    3.70    0.41 
   5  -2   2    4.94    0.37 
  -5  -2  -2    4.12    0.43 
   5  -2   2    4.12    0.41 
  -5  -2  -2    4.69    0.47 
  -5  -2  -2    4.03    0.43 
  -5   2  -2    4.37    0.42 
   5   2   2    4.47    0.47 
   5   2   2    4.71    0.48 
  -5   2  -2    5.10    0.37 
  -5   2  -2    3.82    0.31 
   5   2   2    5.26    0.52 
   6  -2   2    6.91    0.50 
  -6  -2  -2    6.63    0.64 
  -6  -2  -2    7.05    0.52 
   6  -2   2    6.75    0.49 
   6  -2   2    6.63    0.48 
  -6  -2  -2    6.07    0.48 
  -6   2  -2    7.02    0.47 
   6   2   2    6.48    0.53 
   6   2   2    6.49    0.52 
   6   2   2    6.96    0.54 
  -6   2  -2    7.37    0.48 
  -7  -2  -2    5.60    0.58 
   7  -2   2    5.19    0.58 
   7  -2   2    6.23    0.49 
   7  -2   2    5.83    0.57 
  -7  -2  -2    5.12    0.56 
  -7   2  -2    5.70    0.54 
   7   2   2    5.71    0.60 
   7   2   2    5.99    0.65 
   7   2   2    4.91    0.56 
  -7   2  -2    5.61    0.45 
   8  -2   2    7.55    0.62 
   8  -2   2    6.81    0.55 
  -8  -2  -2    5.85    0.62 
   8  -2   2    7.78    0.58 
  -8  -2  -2    8.26    0.77 
   8   2   2    7.28    0.74 
  -8   2  -2    6.16    0.50 
  -8   2  -2    6.62    0.53 
   8   2   2    6.33    0.66 
   8   2   2    7.44    0.73 
  -9  -2  -2    1.94    0.42 
   9  -2   2    2.27    0.41 
   9  -2   2    1.94    0.40 
   9  -2   2    2.48    0.41 
  -9  -2  -2    1.80    0.37 
   9   2   2    3.16    0.53 
   9   2   2    2.26    0.44 
  -9   2  -2    2.97    0.42 
   9   2   2    2.16    0.43 
 -10  -2  -2   -0.05    0.18 
  10  -2   2    0.09    0.20 
  10  -2   2    0.39    0.22 
  10  -2   2    0.07    0.17 
  10   2   2   -0.09    0.15 
  10   2   2    0.10    0.23 
 -10   2  -2   -0.07    0.14 
  10   2   2    0.07    0.19 
  11  -2   2   13.33    0.93 
  11  -2   2   15.06    0.95 
 -11  -2  -2   13.73    0.92 
  11  -2   2   14.65    1.06 
  11   2   2   14.47    1.01 
  11   2   2   12.78    0.94 
  11   2   2   12.54    1.02 
  12  -3  -2    2.17    0.49 
  12  -3  -2    3.05    0.54 
  12   3  -2    2.78    0.48 
  12   3  -2    1.64    0.54 
  11  -3  -2   12.12    0.80 
  11  -3  -2    9.97    0.78 
 -11  -3   2   11.47    0.90 
  11   3  -2   10.36    0.78 
  11   3  -2   11.09    1.11 
 -10  -3   2    1.91    0.36 
 -10  -3   2    1.98    0.43 
  10  -3  -2    1.36    0.33 
  10  -3  -2    1.05    0.27 
  10   3  -2    1.57    0.33 
  10   3  -2    1.84    0.44 
   9  -3  -2    3.07    0.40 
  -9  -3   2    3.16    0.49 
   9  -3  -2    2.78    0.43 
  -9  -3   2    3.38    0.47 
   9   3  -2    3.34    0.46 
  -9   3   2    2.93    0.44 
   9   3  -2    3.25    0.56 
   8  -3  -2    0.86    0.22 
   8  -3  -2    0.85    0.22 
  -8  -3   2    0.61    0.20 
  -8  -3   2    0.33    0.19 
   8   3  -2    0.98    0.28 
   8   3  -2    0.98    0.25 
  -8   3   2    0.72    0.22 
   8   3  -2    1.05    0.28 
  -7  -3   2   40.45    1.58 
  -7  -3   2   38.50    1.65 
   7  -3  -2   43.05    1.57 
   7  -3  -2   41.94    1.60 
   7  -3  -2   41.06    1.46 
  -7  -3   2   43.56    1.69 
   7   3  -2   42.02    1.66 
   7   3  -2   44.10    1.77 
  -7   3   2   40.05    1.61 
   7   3  -2   40.17    1.59 
  -6  -3   2    2.70    0.37 
   6  -3  -2    2.56    0.31 
   6  -3  -2    3.05    0.28 
  -6  -3   2    3.26    0.37 
   6  -3  -2    2.56    0.30 
  -6  -3   2    3.45    0.42 
  -6   3   2    1.99    0.29 
  -6   3   2    2.65    0.32 
   6   3  -2    2.66    0.39 
   6   3  -2    2.83    0.34 
   6   3  -2    2.25    0.33 
  -5  -3   2   43.41    1.67 
   5  -3  -2   44.61    1.53 
   5  -3  -2   44.71    1.57 
  -5  -3   2   47.65    1.62 
  -5  -3   2   49.44    1.69 
   5  -3  -2   45.84    1.60 
   5   3  -2   46.86    1.74 
  -5   3   2   44.74    1.60 
   5   3  -2   45.12    1.62 
   5   3  -2   46.87    1.67 
  -5   3   2   43.36    1.61 
  -4  -3   2   11.18    0.56 
  -4  -3   2   10.85    0.55 
   4  -3  -2   10.43    0.47 
   4  -3  -2   10.26    0.46 
   4  -3  -2   10.12    0.49 
  -4  -3   2    9.66    0.49 
   4   3  -2    9.55    0.52 
   4   3  -2    9.93    0.56 
   4   3  -2    9.76    0.50 
  -4   3   2    9.92    0.50 
  -4   3   2   10.70    0.50 
   3  -3  -2   58.85    1.84 
   3  -3  -2   58.39    1.86 
  -3  -3   2   57.78    1.92 
  -3  -3   2   57.54    1.91 
   3  -3  -2   57.36    1.84 
  -3  -3   2   58.09    1.87 
  -3   3   2   57.42    1.88 
   3   3  -2   58.96    1.90 
   3   3  -2   57.85    1.95 
  -3   3   2   58.09    1.86 
   3   3  -2   58.55    1.87 
  -2  -3   2    0.32    0.08 
   2  -3  -2    0.25    0.06 
   2  -3  -2    0.15    0.05 
   2  -3  -2    0.21    0.06 
  -2  -3   2    0.34    0.08 
  -2  -3   2    0.21    0.07 
   2   3  -2    0.20    0.06 
  -2   3   2    0.20    0.07 
   2   3  -2    0.12    0.06 
   2   3  -2    0.32    0.08 
  -2   3   2    0.25    0.07 
  -1  -3   2   79.21    2.36 
   1  -3  -2   78.70    2.37 
   1  -3  -2   77.20    2.35 
  -1  -3   2   76.35    2.36 
  -1  -3   2   77.72    2.35 
   1   3  -2   79.05    2.32 
  -1   3   2   79.34    2.39 
   1   3  -2   78.74    2.37 
  -1   3   2   75.83    2.37 
   0  -3  -2   46.02    1.45 
   0  -3   2   43.64    1.35 
   0  -3  -2   46.15    1.47 
   0  -3   2   45.84    1.35 
   0  -3   2   45.97    1.36 
   0  -3   2   45.85    1.35 
   0  -3   2   44.07    1.34 
   0   3   2   46.90    1.47 
   0   3   2   45.16    1.47 
   0   3  -2   44.36    1.34 
   0   3  -2   45.49    1.36 
   0   3   2   46.18    1.46 
   1  -3   2   29.15    0.90 
   1  -3   2   28.75    0.91 
  -1  -3  -2   31.52    1.06 
   1  -3   2   28.57    0.91 
   1  -3   2   28.26    0.91 
  -1  -3  -2   28.32    1.03 
  -1   3  -2   29.31    0.86 
   1   3   2   29.76    1.05 
   1   3   2   27.95    1.04 
   1   3   2   30.43    1.06 
   1   3   2   27.69    1.02 
   2  -3   2   17.00    0.62 
  -2  -3  -2   15.46    0.70 
   2  -3   2   16.38    0.61 
   2  -3   2   16.47    0.63 
  -2  -3  -2   16.65    0.73 
   2  -3   2   16.56    0.60 
   2   3   2   16.80    0.73 
  -2   3  -2   16.57    0.57 
   2   3   2   16.90    0.73 
   2   3   2   16.96    0.73 
   2   3   2   16.45    0.70 
  -3  -3  -2   14.14    0.70 
   3  -3   2   16.49    0.64 
   3  -3   2   14.40    0.61 
   3  -3   2   14.20    0.64 
   3  -3   2   14.78    0.61 
  -3  -3  -2   15.69    0.73 
  -3   3  -2   15.12    0.58 
   3   3   2   15.39    0.73 
   3   3   2   14.27    0.69 
   3   3   2   14.79    0.71 
   4  -3   2   11.30    0.60 
   4  -3   2   11.49    0.56 
   4  -3   2   12.29    0.59 
  -4  -3  -2   12.61    0.66 
   4  -3   2   10.98    0.56 
  -4  -3  -2   12.84    0.68 
   4   3   2   11.89    0.66 
   4   3   2   11.62    0.65 
  -4   3  -2   12.14    0.54 
   4   3   2   12.13    0.66 
   5  -3   2   16.52    0.83 
  -5  -3  -2   14.81    0.82 
  -5  -3  -2   14.69    0.79 
   5  -3   2   17.94    0.78 
   5  -3   2   15.80    0.75 
  -5  -3  -2   16.33    0.83 
   5  -3   2   16.81    0.78 
   5   3   2   17.14    0.87 
   5   3   2   16.03    0.84 
  -5   3  -2   15.79    0.73 
   5   3   2   16.53    0.85 
  -5   3  -2   17.17    0.73 
   6  -3   2    4.17    0.43 
   6  -3   2    5.24    0.40 
  -6  -3  -2    4.90    0.54 
   6  -3   2    3.97    0.45 
  -6  -3  -2    3.70    0.47 
  -6  -3  -2    5.42    0.57 
   6   3   2    3.93    0.50 
   6   3   2    4.07    0.50 
   6   3   2    4.96    0.56 
  -6   3  -2    4.75    0.45 
  -6   3  -2    5.11    0.38 
   7  -3   2    7.33    0.52 
  -7  -3  -2    6.82    0.55 
   7  -3   2    6.01    0.48 
  -7  -3  -2    7.15    0.57 
   7  -3   2    7.25    0.56 
   7   3   2    7.07    0.57 
   7   3   2    6.89    0.68 
  -7   3  -2    6.86    0.49 
  -7   3  -2    6.01    0.46 
   7   3   2    6.71    0.71 
  -8  -3  -2    0.02    0.16 
   8  -3   2    0.20    0.18 
  -8  -3  -2    0.27    0.19 
   8  -3   2    0.00    0.13 
   8  -3   2    0.13    0.15 
  -8   3  -2    0.01    0.14 
   8   3   2   -0.06    0.12 
   8   3   2    0.15    0.18 
   8   3   2   -0.06    0.12 
   9  -3   2   24.13    1.21 
  -9  -3  -2   23.59    1.28 
  -9  -3  -2   25.25    1.27 
   9  -3   2   28.54    1.36 
   9  -3   2   25.13    1.22 
   9   3   2   23.44    1.27 
   9   3   2   25.54    1.34 
   9   3   2   26.60    1.41 
  -9   3  -2   25.51    1.17 
 -10  -3  -2   -0.19    0.17 
  10  -3   2   -0.10    0.14 
  10  -3   2    0.02    0.18 
  10  -3   2   -0.01    0.15 
 -10  -3  -2   -0.11    0.17 
  10   3   2    0.21    0.24 
  10   3   2    0.06    0.20 
  10   3   2    0.00    0.18 
  11  -3   2    0.09    0.19 
 -11  -3  -2    0.36    0.24 
  11  -3   2    0.52    0.24 
  11   3   2   -0.03    0.26 
  11   3   2    0.23    0.24 
  12  -4  -2    1.14    0.36 
  12   4  -2    0.41    0.25 
 -11  -4   2    6.76    0.84 
  11  -4  -2    6.73    0.70 
  11  -4  -2    6.08    0.65 
  11   4  -2    6.86    0.85 
  11   4  -2    7.21    0.75 
 -10  -4   2    0.02    0.18 
 -10  -4   2   -0.11    0.15 
  10  -4  -2   -0.04    0.13 
  10  -4  -2    0.18    0.17 
  10   4  -2    0.00    0.16 
  10   4  -2   -0.02    0.20 
   9  -4  -2   21.93    1.05 
   9  -4  -2   22.04    1.09 
  -9  -4   2   21.78    1.09 
  -9  -4   2   22.66    1.20 
  -9   4   2   20.30    1.09 
   9   4  -2   22.46    1.11 
   9   4  -2   20.15    1.22 
  -8  -4   2    6.49    0.67 
   8  -4  -2    7.36    0.51 
  -8  -4   2    6.26    0.60 
   8  -4  -2    6.58    0.51 
   8   4  -2    7.16    0.54 
   8   4  -2    7.03    0.78 
   8   4  -2    7.85    0.60 
  -8   4   2    6.98    0.54 
   7  -4  -2    4.01    0.41 
   7  -4  -2    4.62    0.35 
  -7  -4   2    4.51    0.47 
   7  -4  -2    4.36    0.44 
  -7  -4   2    4.29    0.51 
  -7  -4   2    4.97    0.58 
   7   4  -2    4.98    0.61 
   7   4  -2    4.77    0.53 
   7   4  -2    3.69    0.44 
  -7   4   2    6.00    0.55 
  -6  -4   2    0.06    0.11 
   6  -4  -2    0.12    0.09 
   6  -4  -2    0.25    0.12 
  -6  -4   2    0.09    0.12 
   6  -4  -2    0.13    0.10 
  -6  -4   2    0.00    0.11 
   6   4  -2   -0.05    0.10 
  -6   4   2    0.23    0.13 
   6   4  -2    0.06    0.10 
   6   4  -2    0.42    0.18 
  -5  -4   2   11.45    0.63 
   5  -4  -2   11.78    0.54 
   5  -4  -2   11.48    0.55 
  -5  -4   2   11.67    0.59 
   5  -4  -2   12.38    0.58 
  -5  -4   2   10.65    0.62 
   5   4  -2   11.27    0.59 
   5   4  -2   11.58    0.62 
   5   4  -2   10.92    0.66 
  -5   4   2   12.37    0.60 
  -5   4   2   11.39    0.57 
   4  -4  -2    1.99    0.22 
  -4  -4   2    1.93    0.28 
  -4  -4   2    2.10    0.27 
  -4  -4   2    1.58    0.22 
   4  -4  -2    1.40    0.18 
  -4   4   2    1.41    0.20 
   4   4  -2    1.69    0.22 
   4   4  -2    1.53    0.25 
  -4   4   2    1.55    0.20 
   4   4  -2    2.19    0.26 
   3  -4  -2   38.21    1.29 
   3  -4  -2   38.89    1.28 
   3  -4  -2   38.86    1.30 
  -3  -4   2   37.16    1.36 
  -3  -4   2   40.95    1.37 
  -3  -4   2   39.32    1.32 
   3   4  -2   40.58    1.32 
   3   4  -2   36.80    1.34 
   3   4  -2   38.92    1.40 
  -3   4   2   37.52    1.31 
  -3   4   2   38.44    1.29 
  -2  -4   2    2.83    0.21 
   2  -4  -2    2.97    0.18 
  -2  -4   2    3.02    0.21 
   2  -4  -2    3.26    0.19 
   2  -4  -2    2.61    0.19 
  -2  -4   2    3.18    0.20 
   2   4  -2    2.69    0.22 
  -2   4   2    4.15    0.22 
  -2   4   2    3.18    0.19 
   2   4  -2    2.79    0.20 
   2   4  -2    2.71    0.18 
  -1  -4   2  260.91    7.87 
  -1  -4   2  269.18    7.86 
   1  -4  -2  261.67    7.87 
   1  -4  -2  274.60    7.89 
  -1  -4   2  267.55    7.88 
   1   4  -2  268.12    7.82 
  -1   4   2  272.31    7.91 
   1   4  -2  270.49    7.90 
  -1   4   2  270.80    7.89 
   0  -4   2   31.57    0.93 
   0  -4   2   32.07    0.94 
   0  -4  -2   29.46    1.05 
   0  -4   2   30.54    0.94 
   0  -4   2   30.90    0.92 
   0  -4  -2   32.56    1.08 
   0   4   2   29.98    1.07 
   0   4   2   31.25    1.07 
   0   4   2   30.63    1.07 
   0   4  -2   30.94    0.97 
  -1  -4  -2    9.12    0.46 
   1  -4   2    8.56    0.30 
   1  -4   2    8.48    0.29 
  -1  -4  -2    8.75    0.44 
   1  -4   2    8.47    0.30 
   1  -4   2    8.84    0.29 
   1   4   2    8.62    0.45 
   1   4   2    8.56    0.45 
   1   4   2    9.63    0.45 
   1   4   2    9.22    0.46 
   2  -4   2  151.74    4.45 
   2  -4   2  148.56    4.47 
   2  -4   2  152.38    4.48 
  -2  -4  -2  155.53    4.67 
  -2  -4  -2  148.67    4.64 
   2   4   2  150.24    4.65 
   2   4   2  149.59    4.65 
   2   4   2  145.99    4.65 
   2   4   2  147.20    4.62 
  -2   4  -2  152.08    4.41 
   3  -4   2   56.08    1.80 
  -3  -4  -2   55.92    1.97 
   3  -4   2   55.14    1.82 
   3  -4   2   57.01    1.82 
  -3  -4  -2   57.64    1.99 
   3  -4   2   54.62    1.84 
   3   4   2   55.51    1.96 
  -3   4  -2   56.38    1.76 
   3   4   2   57.57    1.98 
   3   4   2   56.49    1.99 
   4  -4   2    1.41    0.20 
  -4  -4  -2    1.23    0.25 
   4  -4   2    1.79    0.25 
   4  -4   2    1.29    0.20 
   4  -4   2    1.26    0.19 
  -4  -4  -2    1.98    0.31 
   4   4   2    1.69    0.28 
   4   4   2    1.33    0.27 
   4   4   2    2.00    0.32 
  -4   4  -2    1.64    0.20 
   5  -4   2    0.73    0.20 
   5  -4   2    0.72    0.17 
  -5  -4  -2    0.38    0.17 
   5  -4   2    0.54    0.15 
   5  -4   2    0.60    0.15 
  -5  -4  -2    0.45    0.20 
  -5  -4  -2    0.29    0.16 
   5   4   2    0.63    0.20 
   5   4   2    0.64    0.20 
   5   4   2    1.01    0.26 
  -5   4  -2    0.85    0.17 
  -5   4  -2    0.84    0.17 
   6  -4   2    0.13    0.12 
   6  -4   2    0.31    0.14 
  -6  -4  -2    0.26    0.17 
  -6  -4  -2    0.19    0.14 
   6  -4   2    0.01    0.11 
  -6  -4  -2   -0.04    0.12 
   6   4   2   -0.18    0.10 
  -6   4  -2    0.24    0.12 
   6   4   2    0.22    0.15 
  -6   4  -2    0.20    0.13 
   6   4   2    0.45    0.22 
   7  -4   2    3.91    0.44 
  -7  -4  -2    3.97    0.52 
  -7  -4  -2    4.87    0.56 
   7  -4   2    4.69    0.49 
   7  -4   2    4.78    0.54 
  -7   4  -2    5.15    0.41 
  -7   4  -2    4.91    0.47 
   7   4   2    4.24    0.57 
   7   4   2    3.90    0.51 
   7   4   2    3.81    0.52 
   8  -4   2    3.71    0.50 
  -8  -4  -2    2.20    0.40 
   8  -4   2    3.34    0.44 
   8  -4   2    3.24    0.42 
  -8  -4  -2    3.11    0.48 
   8   4   2    2.64    0.48 
   8   4   2    2.49    0.44 
  -8   4  -2    3.49    0.42 
   8   4   2    2.22    0.43 
  -9  -4  -2    2.15    0.43 
  -9  -4  -2    1.76    0.41 
   9  -4   2    2.14    0.38 
   9  -4   2    1.66    0.34 
   9   4   2    1.52    0.42 
   9   4   2    2.24    0.44 
   9   4   2    0.82    0.33 
  -9   4  -2    1.69    0.31 
 -10  -4  -2    0.11    0.21 
  10  -4   2    0.07    0.15 
  10  -4   2    0.09    0.15 
  10   4   2   -0.15    0.17 
  10   4   2    0.23    0.23 
  10   4   2    0.32    0.25 
  11  -4   2    9.87    0.75 
  11  -4   2    9.65    0.75 
 -11  -4  -2    9.46    0.92 
  11   4   2    8.62    0.91 
  11   4   2    8.27    1.00 
 -12  -5   2    0.57    0.33 
  12  -5  -2    0.47    0.28 
  12   5  -2    0.53    0.28 
  11  -5  -2    3.48    0.52 
 -11  -5   2    3.50    0.51 
 -11  -5   2    4.03    0.67 
  11  -5  -2    3.40    0.49 
  11   5  -2    2.44    0.54 
  11   5  -2    3.69    0.54 
  10  -5  -2    0.49    0.20 
  10  -5  -2    0.29    0.18 
 -10  -5   2    0.29    0.21 
 -10  -5   2    0.53    0.28 
  10   5  -2    0.12    0.25 
  10   5  -2    0.18    0.19 
  -9  -5   2    1.02    0.31 
  -9  -5   2    1.01    0.28 
   9  -5  -2    1.96    0.34 
   9  -5  -2    1.18    0.28 
   9   5  -2    1.73    0.34 
   9   5  -2    1.65    0.41 
  -8  -5   2    4.87    0.58 
   8  -5  -2    4.87    0.51 
  -8  -5   2    5.36    0.56 
   8  -5  -2    5.00    0.49 
   8   5  -2    4.95    0.53 
  -8   5   2    4.85    0.54 
   8   5  -2    5.66    0.69 
  -7  -5   2    3.73    0.47 
   7  -5  -2    2.54    0.35 
  -7  -5   2    3.68    0.51 
   7  -5  -2    3.00    0.35 
  -7  -5   2    2.93    0.39 
   7  -5  -2    3.39    0.37 
   7   5  -2    2.89    0.38 
  -7   5   2    4.14    0.46 
   7   5  -2    3.27    0.46 
   7   5  -2    3.76    0.52 
   6  -5  -2    6.57    0.42 
  -6  -5   2    6.88    0.52 
  -6  -5   2    6.35    0.45 
   6  -5  -2    6.99    0.45 
   6  -5  -2    7.07    0.43 
  -6  -5   2    7.75    0.54 
   6   5  -2    7.07    0.51 
  -6   5   2    7.10    0.46 
   6   5  -2    6.01    0.45 
   6   5  -2    6.61    0.54 
  -5  -5   2   13.10    0.70 
   5  -5  -2   13.91    0.64 
   5  -5  -2   13.46    0.61 
  -5  -5   2   12.97    0.65 
   5  -5  -2   14.25    0.63 
  -5  -5   2   13.26    0.72 
   5   5  -2   12.61    0.73 
  -5   5   2   13.77    0.65 
  -5   5   2   13.65    0.63 
   5   5  -2   13.03    0.66 
   5   5  -2   12.84    0.68 
   4  -5  -2   62.52    2.04 
   4  -5  -2   61.27    2.01 
  -4  -5   2   61.98    2.06 
  -4  -5   2   63.22    2.14 
  -4  -5   2   62.88    2.12 
   4  -5  -2   60.10    1.99 
  -4   5   2   61.38    2.04 
  -4   5   2   61.74    2.02 
   4   5  -2   60.61    2.10 
   4   5  -2   60.66    2.16 
   4   5  -2   65.24    2.07 
   3  -5  -2   10.92    0.47 
  -3  -5   2    9.81    0.53 
  -3  -5   2   11.55    0.51 
   3  -5  -2   11.31    0.47 
   3  -5  -2   11.04    0.50 
  -3  -5   2   11.58    0.55 
  -3   5   2   11.82    0.50 
   3   5  -2   10.67    0.49 
  -3   5   2   10.56    0.47 
   3   5  -2   10.89    0.53 
   3   5  -2   11.05    0.56 
  -2  -5   2   40.32    1.34 
  -2  -5   2   41.03    1.40 
   2  -5  -2   42.85    1.37 
  -2  -5   2   38.81    1.36 
   2  -5  -2   40.12    1.31 
   2  -5  -2   41.73    1.33 
  -2  -5   2   38.69    1.37 
   2   5  -2   40.33    1.36 
  -2   5   2   41.05    1.35 
   2   5  -2   42.77    1.42 
   2   5  -2   40.44    1.32 
  -2   5   2   41.78    1.33 
   1  -5  -2    2.23    0.15 
  -1  -5   2    1.94    0.18 
   1  -5  -2    2.04    0.16 
   1  -5  -2    2.18    0.16 
  -1  -5   2    1.92    0.15 
  -1  -5   2    1.76    0.13 
   1   5  -2    2.01    0.12 
  -1   5   2    2.14    0.16 
   1   5  -2    1.93    0.19 
  -1   5   2    2.06    0.20 
   0  -5   2   13.01    0.41 
   0  -5   2   12.40    0.53 
   0  -5  -2   12.66    0.53 
   0  -5   2   12.87    0.40 
   0  -5   2   12.57    0.43 
   0  -5   2   12.00    0.43 
   0  -5  -2   13.20    0.55 
   0   5  -2   13.40    0.48 
   0   5   2   13.83    0.56 
   0   5   2   13.01    0.56 
   0   5   2   13.20    0.56 
   1  -5   2  243.77    7.24 
  -1  -5  -2  245.69    7.27 
  -1  -5  -2  252.13    7.30 
   1   5   2  234.37    7.27 
   1   5   2  237.96    7.28 
   1   5   2  248.81    7.29 
   1   5   2  235.76    7.27 
   2  -5   2   38.60    1.36 
  -2  -5  -2   37.49    1.41 
   2  -5   2   38.90    1.20 
  -2  -5  -2   39.39    1.44 
   2  -5   2   39.07    1.23 
   2  -5   2   39.01    1.22 
   2  -5   2   40.16    1.25 
   2   5   2   36.42    1.42 
  -2   5  -2   39.48    1.17 
   2   5   2   38.25    1.41 
   2   5   2   38.67    1.43 
   2   5   2   38.39    1.42 
   3  -5   2   46.60    1.50 
  -3  -5  -2   44.80    1.66 
   3  -5   2   43.69    1.46 
   3  -5   2   45.65    1.44 
   3  -5   2   45.22    1.57 
  -3  -5  -2   43.71    1.66 
   3   5   2   43.52    1.66 
   3   5   2   44.95    1.64 
   3   5   2   42.68    1.64 
  -3   5  -2   43.51    1.40 
   4  -5   2    3.22    0.25 
  -4  -5  -2    3.29    0.40 
  -4  -5  -2    3.63    0.45 
   4  -5   2    3.55    0.25 
   4  -5   2    3.45    0.35 
  -4   5  -2    3.57    0.24 
  -4   5  -2    3.06    0.24 
   4   5   2    4.11    0.45 
   4   5   2    4.06    0.46 
   4   5   2    3.81    0.45 
   5  -5   2    0.43    0.16 
   5  -5   2    0.65    0.15 
  -5  -5  -2    0.47    0.18 
  -5  -5  -2    1.13    0.27 
   5  -5   2    0.76    0.17 
  -5  -5  -2    0.71    0.22 
   5   5   2    0.42    0.17 
  -5   5  -2    0.68    0.15 
   5   5   2    0.85    0.24 
   5   5   2    1.18    0.28 
  -5   5  -2    0.66    0.14 
  -6  -5  -2    7.96    0.62 
  -6  -5  -2    9.56    0.64 
   6  -5   2    8.38    0.52 
   6  -5   2    8.84    0.52 
   6  -5   2    8.32    0.56 
   6   5   2    8.99    0.65 
   6   5   2   10.40    0.70 
  -6   5  -2    9.24    0.51 
   6   5   2   10.18    0.70 
  -6   5  -2    9.89    0.53 
  -7  -5  -2    3.74    0.50 
   7  -5   2    5.31    0.51 
   7  -5   2    4.57    0.45 
  -7  -5  -2    5.06    0.58 
  -7   5  -2    4.77    0.38 
   7   5   2    5.13    0.62 
   7   5   2    4.35    0.58 
   7   5   2    5.04    0.58 
  -8  -5  -2   18.90    1.04 
   8  -5   2   18.71    0.93 
  -8  -5  -2   17.51    1.05 
   8  -5   2   18.18    0.93 
   8   5   2   18.51    1.06 
   8   5   2   18.93    1.10 
  -8   5  -2   19.06    0.88 
   8   5   2   18.72    1.12 
  -9  -5  -2    7.26    0.79 
  -9  -5  -2    9.37    0.72 
   9  -5   2    7.87    0.60 
   9  -5   2    8.63    0.62 
   9   5   2    7.70    0.80 
   9   5   2    9.47    0.98 
   9   5   2    7.78    0.83 
 -10  -5  -2    0.43    0.28 
 -10  -5  -2    0.63    0.29 
  10  -5   2    0.33    0.21 
  10  -5   2    0.19    0.19 
  10   5   2    0.50    0.25 
  10   5   2    0.54    0.31 
 -11  -5  -2    2.46    0.48 
  11  -5   2    2.61    0.45 
  11  -5   2    3.01    0.48 
  11   5   2    3.98    0.69 
  11   5   2    3.84    0.61 
  11  -6  -2    4.69    0.58 
 -11  -6   2    4.37    0.65 
  11  -6  -2    4.27    0.56 
 -11  -6   2    5.52    0.66 
  11   6  -2    3.68    0.55 
  11   6  -2    4.07    0.71 
 -10  -6   2    4.43    0.58 
  10  -6  -2    2.49    0.40 
 -10  -6   2    2.93    0.53 
  10  -6  -2    2.95    0.47 
  10   6  -2    3.29    0.49 
  10   6  -2    3.50    0.60 
   9  -6  -2    4.81    0.52 
   9  -6  -2    5.72    0.60 
  -9  -6   2    5.89    0.70 
  -9  -6   2    6.83    0.68 
   9   6  -2    6.08    0.65 
   9   6  -2    3.88    0.62 
   8  -6  -2    1.06    0.24 
  -8  -6   2    0.48    0.22 
   8  -6  -2    0.62    0.21 
  -8  -6   2    0.55    0.25 
   8   6  -2    0.96    0.27 
   8   6  -2    0.58    0.25 
  -8   6   2    0.85    0.23 
   7  -6  -2    1.50    0.26 
  -7  -6   2    1.57    0.33 
  -7  -6   2    1.25    0.27 
   7  -6  -2    1.17    0.24 
  -7  -6   2    1.54    0.31 
   7  -6  -2    1.64    0.28 
   7   6  -2    1.44    0.33 
   7   6  -2    2.40    0.36 
  -7   6   2    1.97    0.32 
   7   6  -2    1.41    0.31 
  -6  -6   2    1.93    0.33 
  -6  -6   2    2.96    0.40 
  -6  -6   2    2.17    0.31 
   6  -6  -2    1.97    0.27 
   6  -6  -2    2.40    0.30 
   6  -6  -2    1.91    0.28 
   6   6  -2    2.76    0.38 
   6   6  -2    2.69    0.35 
  -6   6   2    2.32    0.31 
   6   6  -2    2.49    0.42 
  -5  -6   2    0.08    0.09 
   5  -6  -2    0.03    0.07 
   5  -6  -2    0.00    0.08 
  -5  -6   2   -0.10    0.09 
  -5  -6   2    0.08    0.10 
   5  -6  -2    0.06    0.08 
  -5   6   2    0.22    0.11 
  -5   6   2    0.10    0.10 
   5   6  -2    0.15    0.12 
   5   6  -2    0.06    0.12 
   5   6  -2    0.16    0.12 
   4  -6  -2   27.49    1.03 
   4  -6  -2   26.05    0.98 
   4  -6  -2   27.37    0.98 
  -4  -6   2   26.85    1.09 
  -4  -6   2   25.89    1.03 
  -4  -6   2   26.35    1.10 
   4   6  -2   26.80    1.08 
   4   6  -2   26.72    1.13 
  -4   6   2   27.25    0.99 
  -4   6   2   26.93    1.01 
   4   6  -2   26.15    1.03 
  -3  -6   2   61.85    1.95 
   3  -6  -2   53.41    1.82 
  -3  -6   2   56.81    1.91 
   3  -6  -2   55.23    1.80 
   3  -6  -2   59.94    1.88 
   3  -6  -2   58.04    1.88 
  -3  -6   2   58.33    1.88 
  -3   6   2   56.00    1.82 
   3   6  -2   53.75    1.89 
  -3   6   2   54.28    1.83 
   3   6  -2   56.03    1.85 
   3   6  -2   57.25    1.97 
   2  -6  -2   10.07    0.44 
   2  -6  -2   10.70    0.48 
   2  -6  -2   10.99    0.44 
   2  -6  -2   10.18    0.43 
  -2  -6   2    9.86    0.48 
  -2  -6   2   10.60    0.51 
  -2  -6   2   11.34    0.49 
  -2  -6   2    9.48    0.44 
   2   6  -2    9.88    0.43 
  -2   6   2   10.68    0.45 
  -2   6   2   10.64    0.46 
   2   6  -2   10.87    0.52 
   1  -6  -2   16.37    0.61 
  -1  -6   2   15.72    0.59 
   1  -6  -2   17.48    0.64 
   1  -6  -2   16.10    0.60 
  -1  -6   2   16.03    0.63 
   1  -6  -2   15.73    0.63 
  -1  -6   2   14.62    0.60 
  -1  -6   2   16.51    0.61 
  -1   6   2   15.49    0.64 
  -1   6   2   15.45    0.63 
   1   6  -2   17.12    0.65 
   1   6  -2   16.53    0.55 
  -1   6   2   15.89    0.65 
   0  -6   2   39.97    1.19 
   0  -6   2   38.92    1.19 
   0  -6  -2   40.82    1.37 
   0  -6  -2   38.71    1.30 
   0  -6   2   38.62    1.21 
   0  -6   2   40.12    1.35 
   0  -6  -2   39.93    1.34 
   0  -6   2   38.25    1.21 
   0   6  -2   39.63    1.28 
   0   6   2   39.09    1.36 
   0   6   2   39.19    1.36 
   0   6   2   39.52    1.37 
  -1  -6  -2   32.47    1.25 
  -1  -6  -2   33.42    1.23 
   1  -6   2   33.68    1.21 
   1   6   2   32.19    1.24 
   1   6   2   35.20    1.26 
   1   6   2   32.50    1.24 
  -1   6  -2   35.19    1.09 
   1   6   2   35.41    1.27 
  -2  -6  -2   44.02    1.63 
  -2  -6  -2   47.42    1.67 
   2  -6   2   44.38    1.39 
   2  -6   2   44.56    1.40 
   2  -6   2   44.54    1.57 
   2  -6   2   43.92    1.41 
   2  -6   2   45.95    1.37 
   2   6   2   48.16    1.67 
   2   6   2   45.71    1.64 
   2   6   2   46.08    1.64 
   2   6   2   44.23    1.63 
   3  -6   2    1.58    0.19 
   3  -6   2    1.50    0.15 
  -3  -6  -2    1.58    0.27 
   3  -6   2    1.28    0.20 
  -3  -6  -2    1.86    0.31 
   3  -6   2    1.49    0.17 
   3   6   2    2.15    0.32 
   3   6   2    1.19    0.23 
   3   6   2    1.42    0.27 
  -3   6  -2    1.51    0.11 
   4  -6   2   15.70    0.70 
   4  -6   2   16.02    0.63 
   4  -6   2   14.35    0.73 
  -4  -6  -2   14.06    0.80 
  -4  -6  -2   15.79    0.83 
   4  -6   2   15.99    0.65 
   4   6   2   17.25    0.86 
  -4   6  -2   15.24    0.62 
   4   6   2   15.00    0.82 
  -4   6  -2   16.03    0.61 
   4   6   2   16.16    0.83 
   5  -6   2   16.34    0.80 
   5  -6   2   16.87    0.72 
  -5  -6  -2   17.18    0.91 
  -5  -6  -2   15.95    0.90 
   5  -6   2   16.33    0.73 
  -5  -6  -2   17.41    0.88 
  -5   6  -2   17.57    0.70 
   5   6   2   17.06    0.92 
   5   6   2   17.31    0.90 
   5   6   2   15.82    0.90 
  -5   6  -2   15.61    0.69 
  -6  -6  -2    7.49    0.59 
   6  -6   2    6.73    0.44 
  -6  -6  -2    7.61    0.61 
   6  -6   2    7.96    0.48 
  -6  -6  -2    8.50    0.61 
  -6   6  -2    6.95    0.43 
   6   6   2    6.49    0.67 
   6   6   2    7.77    0.60 
  -6   6  -2    6.61    0.42 
   6   6   2    8.04    0.63 
  -7  -6  -2    4.22    0.57 
   7  -6   2    4.19    0.44 
  -7  -6  -2    5.61    0.62 
   7  -6   2    4.22    0.45 
   7   6   2    4.27    0.55 
   7   6   2    5.73    0.68 
   7   6   2    4.03    0.54 
  -7   6  -2    4.27    0.41 
  -8  -6  -2    9.43    0.74 
   8  -6   2    8.09    0.58 
   8  -6   2    9.25    0.60 
  -8  -6  -2    9.76    0.72 
   8   6   2    8.63    0.70 
   8   6   2    8.30    0.83 
   8   6   2   10.63    0.81 
   9  -6   2    0.42    0.18 
  -9  -6  -2    0.44    0.24 
  -9  -6  -2    0.38    0.26 
   9  -6   2    0.34    0.18 
   9   6   2    0.40    0.27 
   9   6   2    0.66    0.27 
  10  -6   2    3.96    0.53 
 -10  -6  -2    5.15    0.70 
  10  -6   2    3.85    0.50 
 -10  -6  -2    3.15    0.54 
  10   6   2    3.20    0.60 
  10   6   2    3.49    0.59 
  11  -6   2    0.46    0.23 
 -11  -6  -2    0.28    0.26 
  11  -6   2    0.18    0.20 
  11   6   2    0.80    0.37 
  11   6   2    0.52    0.29 
  11  -7  -2    0.32    0.21 
 -11  -7   2    0.30    0.26 
  11  -7  -2    0.43    0.22 
 -11  -7   2    0.40    0.26 
  11   7  -2    0.20    0.20 
  11   7  -2    0.22    0.30 
 -10  -7   2    2.50    0.49 
  10  -7  -2    2.40    0.40 
 -10  -7   2    2.52    0.43 
  10  -7  -2    3.30    0.46 
  10   7  -2    2.62    0.54 
  10   7  -2    2.81    0.45 
  -9  -7   2    0.10    0.15 
  -9  -7   2   -0.20    0.14 
   9  -7  -2   -0.11    0.10 
   9  -7  -2    0.06    0.12 
   9   7  -2    0.02    0.20 
   9   7  -2    0.09    0.18 
  -8  -7   2    2.22    0.36 
   8  -7  -2    2.30    0.34 
  -8  -7   2    1.94    0.42 
   8  -7  -2    2.34    0.33 
  -8  -7   2    1.55    0.36 
   8   7  -2    3.52    0.57 
   8   7  -2    2.18    0.37 
   7  -7  -2    2.71    0.33 
  -7  -7   2    3.39    0.47 
   7  -7  -2    2.48    0.32 
  -7  -7   2    3.24    0.42 
  -7  -7   2    2.97    0.45 
   7  -7  -2    3.02    0.38 
   7   7  -2    2.64    0.39 
   7   7  -2    2.50    0.44 
  -7   7   2    2.72    0.36 
   6  -7  -2    0.13    0.11 
   6  -7  -2   -0.01    0.11 
  -6  -7   2   -0.15    0.08 
   6  -7  -2    0.09    0.10 
  -6  -7   2    0.12    0.14 
  -6  -7   2    0.17    0.15 
   6   7  -2    0.02    0.11 
   6   7  -2    0.11    0.15 
   6   7  -2    0.05    0.13 
  -6   7   2    0.02    0.09 
  -5  -7   2   26.62    1.07 
   5  -7  -2   25.11    0.99 
  -5  -7   2   26.19    1.15 
   5  -7  -2   25.49    1.04 
   5  -7  -2   24.63    0.97 
  -5  -7   2   26.51    1.14 
   5   7  -2   24.38    1.04 
   5   7  -2   24.89    1.17 
  -5   7   2   26.16    1.02 
   5   7  -2   26.06    1.12 
  -4  -7   2   37.15    1.43 
   4  -7  -2   35.83    1.32 
   4  -7  -2   36.99    1.30 
  -4  -7   2   36.99    1.42 
   4  -7  -2   37.70    1.28 
   4  -7  -2   37.53    1.37 
  -4  -7   2   38.20    1.37 
   4   7  -2   36.33    1.34 
   4   7  -2   36.48    1.40 
  -4   7   2   37.74    1.32 
   4   7  -2   38.88    1.49 
  -4   7   2   36.53    1.30 
  -3  -7   2    9.27    0.50 
   3  -7  -2    9.58    0.43 
   3  -7  -2    9.78    0.45 
   3  -7  -2    9.37    0.43 
  -3  -7   2    9.23    0.51 
  -3  -7   2    9.33    0.47 
   3  -7  -2    8.81    0.47 
  -3   7   2    8.69    0.44 
   3   7  -2    9.02    0.53 
   3   7  -2    9.50    0.46 
   3   7  -2    9.43    0.50 
   2  -7  -2   30.11    1.03 
   2  -7  -2   29.04    1.04 
  -2  -7   2   30.33    1.13 
  -2  -7   2   31.29    1.11 
  -2  -7   2   29.91    1.05 
  -2  -7   2   29.61    1.09 
   2  -7  -2   30.16    1.10 
   2  -7  -2   30.66    1.03 
  -2  -7   2   31.61    1.05 
   2   7  -2   29.73    1.14 
   2   7  -2   30.52    1.03 
  -2   7   2   29.58    1.07 
   1  -7  -2   19.82    0.71 
   1  -7  -2   18.40    0.74 
  -1  -7   2   18.56    0.72 
   1  -7  -2   20.13    0.75 
  -1  -7   2   18.96    0.68 
  -1  -7   2   18.23    0.73 
  -1  -7   2   18.83    0.69 
  -1  -7   2   18.70    0.71 
   1  -7  -2   19.32    0.71 
  -1   7   2   20.52    0.77 
  -1   7   2   18.55    0.74 
  -1   7   2   20.05    0.78 
   1   7  -2   19.11    0.75 
   1   7  -2   19.27    0.64 
   0  -7   2    7.49    0.40 
   0  -7   2    7.18    0.30 
   0  -7   2    6.97    0.30 
   0  -7  -2    7.34    0.36 
   0  -7   2    7.58    0.29 
   0  -7  -2    7.19    0.39 
   0  -7   2    7.56    0.28 
   0  -7  -2    7.01    0.41 
   0   7   2    7.59    0.43 
   0   7  -2    7.98    0.36 
   0   7   2    7.20    0.41 
   0   7   2    7.21    0.41 
  -1  -7  -2   83.25    2.77 
  -1  -7  -2   85.36    2.81 
   1  -7   2   88.51    2.76 
  -1  -7  -2   84.72    2.66 
   1   7   2   86.09    2.80 
   1   7   2   84.59    2.80 
   1   7   2   88.60    2.80 
   1   7   2   84.54    2.80 
  -1   7  -2   88.26    2.63 
   2  -7   2   48.30    1.70 
   2  -7   2   49.88    1.49 
   2  -7   2   49.01    1.47 
  -2  -7  -2   48.35    1.76 
   2  -7   2   49.27    1.49 
   2  -7   2   47.84    1.50 
  -2  -7  -2   48.92    1.78 
   2   7   2   47.62    1.75 
   2   7   2   48.50    1.77 
   2   7   2   49.74    1.79 
   2   7   2   50.10    1.78 
   3  -7   2   16.35    0.59 
   3  -7   2   15.42    0.57 
   3  -7   2   15.52    0.62 
   3  -7   2   14.91    0.73 
  -3  -7  -2   16.18    0.82 
  -3  -7  -2   17.02    0.84 
   3   7   2   16.11    0.80 
   3   7   2   15.99    0.82 
  -3   7  -2   15.77    0.54 
   3   7   2   16.22    0.82 
   4  -7   2    0.04    0.06 
   4  -7   2    0.22    0.09 
  -4  -7  -2    0.06    0.11 
   4  -7   2    0.09    0.10 
  -4  -7  -2   -0.02    0.11 
   4  -7   2    0.09    0.06 
   4   7   2    0.02    0.13 
   4   7   2    0.13    0.12 
  -4   7  -2    0.06    0.06 
   4   7   2    0.21    0.14 
  -4   7  -2    0.12    0.07 
   5  -7   2    9.24    0.47 
   5  -7   2    9.47    0.55 
  -5  -7  -2    8.95    0.64 
  -5  -7  -2    8.21    0.59 
   5  -7   2    9.02    0.46 
  -5  -7  -2    8.85    0.65 
   5   7   2    8.98    0.64 
  -5   7  -2    8.74    0.43 
   5   7   2    9.40    0.64 
   5   7   2    9.31    0.65 
  -5   7  -2    8.16    0.42 
   6  -7   2    0.08    0.10 
  -6  -7  -2   -0.06    0.14 
  -6  -7  -2    0.08    0.18 
   6  -7   2   -0.01    0.09 
  -6  -7  -2    0.06    0.14 
   6   7   2    0.09    0.15 
   6   7   2    0.04    0.15 
   6   7   2    0.15    0.15 
  -6   7  -2    0.04    0.09 
  -7  -7  -2    3.02    0.47 
  -7  -7  -2    2.09    0.42 
   7  -7   2    2.48    0.35 
   7  -7   2    2.69    0.34 
   7   7   2    2.65    0.45 
   7   7   2    2.42    0.47 
   7   7   2    2.89    0.47 
  -7   7  -2    2.90    0.35 
   8  -7   2    8.99    0.59 
   8  -7   2    9.00    0.59 
  -8  -7  -2    9.70    0.73 
  -8  -7  -2    9.68    0.77 
   8   7   2   10.68    0.78 
   8   7   2   10.22    0.80 
   8   7   2    8.70    0.91 
  -9  -7  -2    0.03    0.21 
   9  -7   2    0.15    0.16 
  -9  -7  -2    0.22    0.21 
   9  -7   2    0.12    0.14 
   9   7   2    0.18    0.24 
   9   7   2    0.01    0.18 
  10  -7   2    1.28    0.30 
 -10  -7  -2    0.52    0.28 
 -10  -7  -2    0.69    0.28 
  10  -7   2    0.73    0.24 
  10   7   2    0.38    0.26 
  10   7   2    0.18    0.26 
 -11  -7  -2    1.75    0.46 
 -11  -7  -2    1.62    0.41 
  11  -7   2    1.28    0.32 
  11  -7   2    1.17    0.33 
  11   7   2    1.30    0.47 
  11   7   2    0.11    0.22 
 -11  -8   2    0.30    0.25 
 -11  -8   2    0.23    0.23 
  11  -8  -2    0.38    0.23 
  11  -8  -2    0.67    0.27 
  11   8  -2    0.80    0.31 
  11   8  -2    0.22    0.27 
 -10  -8   2    6.31    0.79 
  10  -8  -2    5.71    0.60 
  10  -8  -2    5.84    0.63 
 -10  -8   2    6.01    0.69 
  10   8  -2    8.76    0.82 
  10   8  -2    6.26    0.81 
  -9  -8   2    0.02    0.17 
   9  -8  -2   -0.02    0.13 
   9  -8  -2    0.09    0.13 
  -9  -8   2    0.12    0.20 
   9   8  -2    0.17    0.18 
   9   8  -2    0.04    0.18 
   8  -8  -2    1.32    0.25 
  -8  -8   2    1.82    0.39 
   8  -8  -2    1.69    0.31 
  -8  -8   2    1.20    0.32 
  -8  -8   2    1.11    0.29 
   8   8  -2    1.01    0.34 
   8   8  -2    1.89    0.37 
   7  -8  -2    0.99    0.21 
  -7  -8   2    0.66    0.22 
  -7  -8   2    1.18    0.32 
   7  -8  -2    1.51    0.29 
   7  -8  -2    0.62    0.18 
  -7  -8   2    0.48    0.25 
   7   8  -2    0.52    0.21 
  -7   8   2    1.25    0.25 
   7   8  -2    0.96    0.28 
   6  -8  -2    1.00    0.22 
  -6  -8   2    1.10    0.28 
  -6  -8   2    1.31    0.26 
   6  -8  -2    1.14    0.20 
  -6  -8   2    1.11    0.27 
   6  -8  -2    0.99    0.19 
   6   8  -2    1.41    0.32 
  -6   8   2    0.67    0.18 
   6   8  -2    1.18    0.25 
   5  -8  -2   23.65    1.00 
  -5  -8   2   22.81    1.06 
  -5  -8   2   23.34    1.01 
  -5  -8   2   24.85    1.10 
   5  -8  -2   24.07    0.92 
   5  -8  -2   21.45    0.91 
   5   8  -2   22.88    0.99 
   5   8  -2   23.17    1.05 
  -5   8   2   22.75    0.93 
   5   8  -2   23.56    1.12 
   4  -8  -2   76.17    2.48 
  -4  -8   2   79.85    2.61 
   4  -8  -2   75.09    2.45 
   4  -8  -2   77.48    2.55 
  -4  -8   2   73.42    2.60 
  -4  -8   2   79.48    2.54 
   4  -8  -2   75.44    2.43 
   4   8  -2   78.60    2.52 
   4   8  -2   76.06    2.67 
  -4   8   2   76.67    2.47 
   4   8  -2   75.18    2.58 
   3  -8  -2   18.88    0.73 
   3  -8  -2   19.54    0.73 
   3  -8  -2   19.02    0.74 
  -3  -8   2   19.82    0.79 
   3  -8  -2   18.09    0.80 
  -3  -8   2   19.53    0.85 
  -3  -8   2   19.85    0.84 
   3   8  -2   19.28    0.77 
   3   8  -2   18.66    0.87 
   3   8  -2   17.19    0.80 
  -3   8   2   18.33    0.75 
   2  -8  -2   28.55    1.00 
  -2  -8   2   26.84    1.07 
  -2  -8   2   26.98    0.99 
  -2  -8   2   27.22    0.99 
   2  -8  -2   28.64    0.97 
  -2  -8   2   28.46    1.06 
   2  -8  -2   29.14    1.06 
  -2  -8   2   28.04    1.04 
   2  -8  -2   26.24    0.97 
  -2   8   2   28.39    1.03 
   2   8  -2   28.31    0.97 
   2   8  -2   28.00    1.09 
   1  -8  -2   13.69    0.62 
   1  -8  -2   14.49    0.59 
   1  -8  -2   14.93    0.64 
  -1  -8   2   14.09    0.59 
   1  -8  -2   15.22    0.59 
  -1  -8   2   15.87    0.62 
  -1  -8   2   14.42    0.56 
  -1  -8   2   14.76    0.58 
  -1  -8   2   14.63    0.63 
   1   8  -2   14.20    0.64 
  -1   8   2   14.25    0.66 
  -1   8   2   14.85    0.64 
   1   8  -2   14.79    0.52 
   0  -8   2   63.58    1.98 
   0  -8  -2   64.75    2.16 
   0  -8   2   63.86    1.97 
   0  -8  -2   64.67    2.11 
   0  -8   2   63.89    1.99 
   0  -8  -2   65.61    2.09 
   0  -8  -2   66.32    2.13 
   0  -8   2   61.67    1.98 
   0  -8   2   66.33    2.14 
   0   8  -2   65.37    2.08 
   0   8   2   66.36    2.16 
   0   8   2   65.14    2.15 
   0   8   2   65.92    2.18 
   1  -8   2   36.49    1.08 
  -1  -8  -2   35.36    1.37 
  -1  -8  -2   37.30    1.25 
  -1  -8  -2   36.15    1.35 
   1  -8   2   37.39    1.34 
   1  -8   2   35.65    1.11 
  -1   8  -2   36.25    1.22 
   1   8   2   36.99    1.37 
   1   8   2   34.68    1.36 
   1   8   2   37.22    1.39 
   1   8   2   36.07    1.37 
   2  -8   2   22.35    0.75 
  -2  -8  -2   23.35    0.85 
   2  -8   2   22.20    0.95 
   2  -8   2   22.36    0.72 
  -2  -8  -2   23.25    1.01 
   2  -8   2   23.25    0.74 
  -2  -8  -2   22.33    1.02 
   2  -8   2   22.52    0.73 
   2   8   2   24.28    1.02 
   2   8   2   22.61    1.02 
   2   8   2   24.05    1.03 
   2   8   2   25.60    1.04 
   3  -8   2   26.47    0.86 
   3  -8   2   25.37    1.07 
  -3  -8  -2   25.52    1.14 
   3  -8   2   24.97    0.91 
  -3  -8  -2   27.27    1.18 
   3  -8   2   26.00    0.87 
  -3  -8  -2   25.78    0.92 
   3   8   2   26.16    1.16 
   3   8   2   26.03    1.14 
   3   8   2   26.48    1.17 
   4  -8   2   12.69    0.52 
   4  -8   2   13.24    0.70 
  -4  -8  -2   14.15    0.80 
   4  -8   2   12.51    0.59 
  -4  -8  -2   11.65    0.69 
   4  -8   2   13.37    0.55 
  -4  -8  -2   12.96    0.77 
  -4   8  -2   12.89    0.49 
  -4   8  -2   12.48    0.50 
   4   8   2   12.99    0.77 
   4   8   2   13.51    0.78 
   4   8   2   14.29    0.78 
   5  -8   2   84.85    2.68 
  -5  -8  -2   83.30    2.96 
   5  -8   2   85.89    2.82 
  -5  -8  -2   83.42    3.02 
  -5  -8  -2   84.23    2.60 
  -5  -8  -2   87.75    3.05 
   5  -8   2   83.47    2.89 
   5  -8   2   85.53    2.70 
   5   8   2   83.25    3.04 
  -5   8  -2   85.57    2.64 
   5   8   2   85.14    3.04 
   5   8   2   84.69    3.00 
   6  -8   2   32.70    1.25 
  -6  -8  -2   34.33    1.49 
  -6  -8  -2   35.19    1.56 
   6  -8   2   33.50    1.25 
  -6  -8  -2   34.16    1.54 
   6   8   2   32.84    1.54 
  -6   8  -2   32.57    1.18 
   6   8   2   33.64    1.51 
   6   8   2   32.51    1.55 
   7  -8   2    3.87    0.39 
  -7  -8  -2    4.89    0.65 
  -7  -8  -2    3.91    0.54 
   7  -8   2    4.34    0.42 
   7   8   2    5.40    0.70 
   7   8   2    3.93    0.57 
   7   8   2    3.19    0.51 
   8  -8   2   10.11    0.61 
   8  -8   2    9.86    0.61 
  -8  -8  -2    9.11    0.87 
  -8  -8  -2    9.73    0.79 
   8   8   2    9.99    0.98 
   8   8   2    8.81    0.73 
  -9  -8  -2    0.12    0.20 
   9  -8   2    0.22    0.14 
   9  -8   2    0.24    0.18 
  -9  -8  -2    0.47    0.28 
   9   8   2   -0.15    0.15 
   9   8   2    0.17    0.22 
 -10  -8  -2    0.34    0.29 
 -10  -8  -2    0.27    0.23 
  10  -8   2    0.68    0.24 
  10  -8   2    0.44    0.23 
  10   8   2    0.60    0.32 
  10   8   2    0.61    0.30 
 -11  -8  -2   -0.23    0.25 
  11  -8   2    0.02    0.17 
 -11  -8  -2   -0.22    0.17 
  11  -8   2   -0.08    0.15 
  11   8   2    0.09    0.21 
  11   8   2    0.10    0.23 
  11  -9  -2    0.08    0.19 
 -11  -9   2    0.67    0.30 
  11  -9  -2   -0.19    0.15 
 -11  -9   2    0.35    0.29 
  11   9  -2    0.11    0.24 
  11   9  -2    0.59    0.36 
 -10  -9   2    0.84    0.30 
 -10  -9   2    0.93    0.33 
  10  -9  -2    0.92    0.27 
  10  -9  -2    0.63    0.24 
  10   9  -2    0.80    0.40 
  10   9  -2    0.45    0.26 
   9  -9  -2    0.17    0.14 
  -9  -9   2    0.39    0.20 
  -9  -9   2    0.52    0.27 
   9  -9  -2    0.03    0.14 
   9   9  -2    0.14    0.17 
   9   9  -2   -0.02    0.16 
   8  -9  -2    8.96    0.65 
   8  -9  -2   10.37    0.64 
  -8  -9   2   11.19    0.79 
  -8  -9   2   11.87    0.75 
  -8  -9   2   12.00    0.82 
   8  -9  -2   10.00    0.62 
   8   9  -2   10.19    0.70 
   8   9  -2   10.39    1.00 
  -7  -9   2    1.95    0.39 
  -7  -9   2    2.88    0.46 
   7  -9  -2    2.55    0.34 
   7  -9  -2    2.63    0.38 
  -7  -9   2    2.33    0.38 
   7  -9  -2    2.54    0.32 
   7   9  -2    1.95    0.41 
   7   9  -2    3.39    0.45 
  -6  -9   2   61.36    2.25 
  -6  -9   2   59.67    2.26 
   6  -9  -2   58.29    2.13 
   6  -9  -2   61.01    2.03 
   6  -9  -2   56.81    2.03 
  -6  -9   2   58.31    2.14 
  -6   9   2   59.19    2.05 
   6   9  -2   58.59    2.31 
   6   9  -2   58.91    2.13 
   5  -9  -2    4.86    0.33 
  -5  -9   2    5.17    0.52 
  -5  -9   2    5.06    0.40 
   5  -9  -2    5.30    0.50 
  -5  -9   2    5.42    0.56 
   5  -9  -2    5.16    0.35 
   5   9  -2    4.49    0.52 
  -5   9   2    4.92    0.35 
   5   9  -2    5.70    0.41 
   4  -9  -2    0.80    0.15 
  -4  -9   2    0.59    0.16 
  -4  -9   2    0.74    0.17 
  -4  -9   2    0.68    0.20 
   4  -9  -2    0.73    0.16 
   4  -9  -2    0.77    0.19 
   4  -9  -2    0.67    0.14 
   4   9  -2    0.60    0.17 
   4   9  -2    0.50    0.18 
   4   9  -2    0.72    0.18 
  -4   9   2    0.63    0.14 
  -3  -9   2   46.24    1.67 
   3  -9  -2   45.24    1.52 
  -3  -9   2   46.40    1.52 
  -3  -9   2   46.09    1.65 
  -3  -9   2   46.07    1.72 
   3  -9  -2   47.08    1.55 
   3  -9  -2   47.37    1.54 
  -3  -9   2   45.99    1.59 
   3  -9  -2   44.90    1.64 
  -3   9   2   44.58    1.57 
   3   9  -2   44.80    1.64 
   3   9  -2   45.76    1.71 
   3   9  -2   46.28    1.57 
  -2  -9   2    7.55    0.38 
   2  -9  -2    7.11    0.36 
   2  -9  -2    7.14    0.36 
  -2  -9   2    7.26    0.39 
  -2  -9   2    6.34    0.42 
  -2  -9   2    7.82    0.42 
   2  -9  -2    6.88    0.42 
   2  -9  -2    6.86    0.38 
  -2  -9   2    7.03    0.42 
  -2   9   2    6.29    0.39 
   2   9  -2    6.88    0.35 
   2   9  -2    7.74    0.46 
  -1  -9   2   16.68    0.70 
   1  -9  -2   18.09    0.69 
   1  -9  -2   16.55    0.73 
   1  -9  -2   18.11    0.70 
  -1  -9   2   17.71    0.74 
  -1  -9   2   17.20    0.68 
   1  -9  -2   16.69    0.73 
  -1  -9   2   18.06    0.71 
  -1  -9   2   17.59    0.65 
   1   9  -2   16.91    0.60 
   1   9  -2   17.52    0.75 
  -1   9   2   17.40    0.74 
  -1   9   2   17.64    0.78 
   0  -9   2   16.48    0.61 
   0  -9  -2   17.15    0.73 
   0  -9   2   15.96    0.59 
   0  -9   2   16.16    0.58 
   0  -9  -2   16.67    0.69 
   0  -9  -2   17.14    0.71 
   0  -9   2   15.95    0.60 
   0  -9  -2   15.40    0.73 
   0  -9   2   16.19    0.61 
   0  -9   2   17.73    0.74 
   0   9  -2   17.23    0.70 
   0   9   2   16.13    0.76 
   0   9   2   16.46    0.74 
  -1  -9  -2   35.80    1.38 
  -1  -9  -2   35.72    1.25 
   1  -9   2   34.09    1.09 
   1  -9   2   36.07    1.09 
   1  -9   2   36.05    1.11 
  -1  -9  -2   39.30    1.38 
   1  -9   2   35.11    1.06 
   1  -9   2   37.15    1.35 
   1   9   2   36.87    1.39 
   1   9   2   34.88    1.38 
   1   9   2   35.03    1.36 
   1   9   2   35.22    1.37 
  -1   9  -2   34.07    1.23 
   2  -9   2   57.86    2.07 
   2  -9   2   59.74    1.79 
   2  -9   2   59.66    1.81 
  -2  -9  -2   59.01    2.13 
   2  -9   2   60.90    1.81 
   2  -9   2   58.04    1.79 
  -2  -9  -2   59.77    2.15 
  -2  -9  -2   58.62    1.93 
   2   9   2   60.79    2.13 
   2   9   2   60.61    2.15 
   2   9   2   62.01    2.13 
   2   9   2   60.69    2.16 
  -3  -9  -2   24.92    0.90 
   3  -9   2   25.98    1.08 
   3  -9   2   24.83    0.82 
   3  -9   2   24.05    0.83 
  -3  -9  -2   25.10    1.15 
  -3  -9  -2   25.12    1.14 
   3  -9   2   25.17    0.87 
   3   9   2   26.21    1.13 
   3   9   2   26.29    1.17 
   3   9   2   24.44    1.14 
  -3   9  -2   23.62    0.77 
  -4  -9  -2    1.35    0.28 
   4  -9   2    0.88    0.17 
  -4  -9  -2    0.85    0.26 
   4  -9   2    0.91    0.14 
  -4  -9  -2    0.98    0.14 
   4  -9   2    0.73    0.12 
   4  -9   2    1.14    0.24 
  -4  -9  -2    0.80    0.26 
   4   9   2    1.03    0.27 
  -4   9  -2    0.96    0.12 
   4   9   2    0.39    0.19 
  -4   9  -2    0.81    0.11 
   4   9   2    0.97    0.26 
   5  -9   2    0.34    0.11 
   5  -9   2    0.37    0.10 
  -5  -9  -2    0.02    0.15 
  -5  -9  -2    0.09    0.07 
   5  -9   2    0.32    0.14 
   5  -9   2    0.24    0.16 
  -5  -9  -2    0.05    0.14 
  -5  -9  -2    0.31    0.19 
   5   9   2    0.42    0.20 
  -5   9  -2    0.21    0.09 
   5   9   2    0.28    0.18 
   5   9   2    0.16    0.17 
  -6  -9  -2   14.47    0.93 
   6  -9   2   13.94    0.66 
  -6  -9  -2   15.52    0.90 
   6  -9   2   15.12    0.69 
  -6  -9  -2   14.86    0.93 
   6   9   2   13.68    0.91 
   6   9   2   15.47    0.92 
   6   9   2   15.75    0.98 
  -7  -9  -2    8.26    0.83 
  -7  -9  -2    9.72    0.71 
  -7  -9  -2    7.99    0.82 
   7  -9   2    9.06    0.53 
   7  -9   2   10.03    0.55 
   7   9   2    7.23    0.81 
   7   9   2    8.80    0.71 
  -8  -9  -2    2.18    0.43 
  -8  -9  -2    1.59    0.39 
   8  -9   2    2.82    0.36 
   8  -9   2    2.35    0.32 
   8   9   2    1.94    0.40 
   8   9   2    1.38    0.41 
  -9  -9  -2    1.00    0.37 
  -9  -9  -2    0.99    0.33 
   9  -9   2    0.92    0.24 
   9  -9   2    0.90    0.23 
   9   9   2    0.53    0.28 
   9   9   2    0.32    0.22 
 -10  -9  -2   -0.06    0.23 
  10  -9   2    0.21    0.18 
  10  -9   2    0.26    0.19 
 -10  -9  -2    0.09    0.22 
  10   9   2    0.27    0.28 
  10   9   2    0.03    0.21 
 -11  -9  -2    1.34    0.46 
 -11  -9  -2    0.58    0.32 
  11  -9   2    0.72    0.27 
  11  -9   2    0.92    0.28 
  11   9   2    1.99    0.49 
  11   9   2    0.83    0.42 
  11 -10  -2    2.45    0.44 
 -11 -10   2    2.15    0.51 
  11 -10  -2    2.66    0.45 
 -11 -10   2    2.45    0.50 
  11  10  -2    2.17    0.43 
  11  10  -2    1.62    0.49 
  10 -10  -2    0.34    0.18 
  10 -10  -2    0.48    0.21 
 -10 -10   2    0.61    0.27 
 -10 -10   2    0.29    0.27 
  10  10  -2    0.16    0.26 
  10  10  -2    0.81    0.30 
   9 -10  -2    0.19    0.15 
  -9 -10   2    0.11    0.21 
   9 -10  -2    0.14    0.15 
  -9 -10   2   -0.02    0.14 
   9  10  -2   -0.02    0.14 
   9  10  -2    0.07    0.18 
  -8 -10   2    0.41    0.25 
  -8 -10   2    0.63    0.25 
   8 -10  -2    0.68    0.20 
   8 -10  -2    1.02    0.23 
  -8 -10   2    1.41    0.37 
   8 -10  -2    0.68    0.24 
   8  10  -2    0.36    0.24 
   8  10  -2    0.49    0.22 
   7 -10  -2    4.08    0.41 
   7 -10  -2    3.97    0.40 
   7 -10  -2    4.38    0.50 
  -7 -10   2    5.17    0.57 
  -7 -10   2    4.19    0.57 
  -7 -10   2    3.67    0.50 
   7  10  -2    4.91    0.64 
   7  10  -2    4.70    0.51 
  -6 -10   2   -0.06    0.13 
   6 -10  -2    0.03    0.12 
  -6 -10   2    0.21    0.15 
   6 -10  -2    0.16    0.11 
   6 -10  -2    0.05    0.09 
  -6 -10   2   -0.02    0.12 
   6  10  -2    0.04    0.16 
   6  10  -2    0.42    0.18 
  -5 -10   2   32.95    1.39 
  -5 -10   2   31.75    1.39 
   5 -10  -2   32.20    1.21 
   5 -10  -2   34.29    1.35 
  -5 -10   2   33.14    1.32 
   5 -10  -2   31.61    1.19 
   5  10  -2   31.94    1.29 
  -5  10   2   32.73    1.23 
   5  10  -2   32.49    1.45 
  -4 -10   2    0.69    0.19 
  -4 -10   2    0.74    0.20 
   4 -10  -2    0.61    0.13 
   4 -10  -2    1.06    0.19 
   4 -10  -2    0.90    0.17 
  -4 -10   2    0.86    0.21 
   4 -10  -2    0.78    0.19 
   4  10  -2    0.87    0.19 
  -4  10   2    0.92    0.18 
   4  10  -2    0.75    0.23 
   4  10  -2    0.74    0.21 
   3 -10  -2    9.77    0.45 
  -3 -10   2    8.82    0.49 
  -3 -10   2    8.68    0.55 
  -3 -10   2    9.40    0.59 
   3 -10  -2   10.13    0.47 
  -3 -10   2    9.89    0.47 
   3 -10  -2   10.40    0.49 
   3 -10  -2   10.44    0.57 
  -3 -10   2    9.40    0.54 
   3  10  -2    9.96    0.60 
   3  10  -2    9.12    0.48 
  -3  10   2    8.98    0.49 
  -2 -10   2   24.89    0.92 
  -2 -10   2   25.24    1.03 
   2 -10  -2   23.84    1.00 
   2 -10  -2   24.18    0.90 
  -2 -10   2   26.19    1.01 
  -2 -10   2   24.00    0.97 
   2 -10  -2   23.27    0.94 
  -2 -10   2   25.12    0.96 
   2 -10  -2   25.08    0.90 
  -2  10   2   25.90    1.02 
  -2  10   2   25.84    0.98 
   2  10  -2   24.15    0.89 
   2  10  -2   23.60    1.03 
  -1 -10   2   17.67    0.73 
  -1 -10   2   17.37    0.70 
   1 -10  -2   19.44    0.79 
  -1 -10   2   17.54    0.66 
  -1 -10   2   16.92    0.73 
   1 -10  -2   18.36    0.77 
  -1 -10   2   16.43    0.72 
   1 -10  -2   17.71    0.73 
  -1 -10   2   18.44    0.77 
   1 -10  -2   17.28    0.70 
  -1  10   2   17.66    0.81 
  -1  10   2   17.83    0.77 
   1  10  -2   18.16    0.79 
   1  10  -2   16.93    0.61 
   0 -10  -2   36.18    1.40 
   0 -10   2   38.01    1.39 
   0 -10   2   36.20    1.21 
   0 -10  -2   39.42    1.39 
   0 -10   2   36.77    1.24 
   0 -10  -2   35.96    1.33 
   0 -10   2   37.88    1.24 
   0 -10  -2   37.75    1.34 
   0 -10   2   37.47    1.22 
   0  10   2   37.84    1.39 
   0  10   2   37.43    1.44 
   0  10  -2   36.96    1.33 
  -1 -10  -2    0.82    0.19 
   1 -10   2    0.54    0.15 
   1 -10   2    0.87    0.11 
   1 -10   2    0.83    0.06 
  -1 -10  -2    0.53    0.13 
   1 -10   2    0.91    0.10 
   1 -10   2    0.78    0.09 
  -1 -10  -2    0.56    0.17 
   1  10   2    0.91    0.21 
   1  10   2    0.96    0.20 
  -1  10  -2    1.14    0.18 
   1  10   2    0.95    0.21 
   1  10   2    1.01    0.24 
  -2 -10  -2   25.38    1.12 
   2 -10   2   24.77    0.79 
   2 -10   2   24.09    0.77 
  -2 -10  -2   23.44    1.08 
   2 -10   2   24.07    0.77 
   2 -10   2   23.85    0.78 
   2 -10   2   23.73    1.04 
  -2 -10  -2   23.05    0.90 
   2  10   2   25.23    1.11 
  -2  10  -2   23.86    0.91 
   2  10   2   22.84    1.09 
   2  10   2   26.01    1.09 
   3 -10   2    2.17    0.22 
   3 -10   2    1.98    0.14 
   3 -10   2    2.16    0.14 
   3 -10   2    2.71    0.35 
  -3 -10  -2    2.29    0.39 
  -3 -10  -2    2.81    0.39 
  -3 -10  -2    2.50    0.24 
   3 -10   2    2.90    0.19 
   3  10   2    1.56    0.31 
   3  10   2    1.89    0.34 
   3  10   2    2.50    0.40 
   4 -10   2   15.82    0.81 
  -4 -10  -2   15.74    0.89 
  -4 -10  -2   13.78    0.59 
  -4 -10  -2   14.97    0.87 
   4 -10   2   14.49    0.56 
  -4 -10  -2   14.65    0.80 
   4 -10   2   13.74    0.56 
   4 -10   2   14.69    0.64 
   4  10   2   16.75    0.91 
   4  10   2   14.99    0.83 
   4  10   2   13.60    0.84 
   5 -10   2    0.75    0.22 
  -5 -10  -2    0.80    0.25 
  -5 -10  -2    0.63    0.12 
   5 -10   2    0.93    0.16 
  -5 -10  -2    0.51    0.21 
  -5 -10  -2    0.72    0.25 
   5 -10   2    0.84    0.14 
   5 -10   2    0.45    0.16 
   5  10   2    0.94    0.28 
   5  10   2    0.87    0.27 
   5  10   2    0.51    0.22 
  -6 -10  -2    8.76    0.69 
   6 -10   2    7.34    0.42 
  -6 -10  -2    6.84    0.69 
   6 -10   2    7.67    0.44 
   6 -10   2    6.58    0.64 
  -6 -10  -2    9.20    0.87 
   6  10   2    6.78    0.72 
   6  10   2    7.79    0.81 
  -7 -10  -2    0.92    0.29 
   7 -10   2    0.19    0.11 
   7 -10   2    0.40    0.16 
  -7 -10  -2    0.63    0.27 
  -7 -10  -2    0.28    0.21 
   7  10   2    0.19    0.19 
   7  10   2    0.52    0.24 
   8 -10   2    1.00    0.22 
  -8 -10  -2    0.92    0.31 
  -8 -10  -2    0.64    0.28 
   8 -10   2    0.74    0.19 
   8  10   2    0.96    0.32 
   8  10   2    1.49    0.45 
  -9 -10  -2    9.42    0.98 
  -9 -10  -2    7.44    0.83 
   9 -10   2    9.53    0.62 
   9 -10   2    9.78    0.62 
   9  10   2    9.25    0.92 
   9  10   2    9.60    1.05 
 -10 -10  -2    3.49    0.60 
 -10 -10  -2    2.36    0.51 
  10 -10   2    2.81    0.41 
  10 -10   2    2.42    0.38 
  10  10   2    1.96    0.52 
  10  10   2    2.71    0.52 
  11 -10   2    0.40    0.20 
  11 -10   2    0.22    0.20 
 -11 -10  -2    0.67    0.33 
 -11 -10  -2    0.17    0.29 
  11  10   2    0.10    0.25 
  11  10   2   -0.19    0.22 
 -11 -11   2    1.35    0.40 
  11 -11  -2    1.23    0.32 
 -11 -11   2    1.72    0.47 
  11 -11  -2    1.16    0.32 
  11  11  -2    0.99    0.43 
  11  11  -2    1.56    0.38 
  10 -11  -2    0.01    0.14 
 -10 -11   2    0.29    0.25 
 -10 -11   2    0.15    0.19 
  10 -11  -2   -0.01    0.15 
  10  11  -2    0.15    0.26 
  10  11  -2    0.16    0.21 
  -9 -11   2    1.81    0.37 
  -9 -11   2    1.26    0.36 
   9 -11  -2    1.62    0.33 
   9 -11  -2    0.97    0.25 
   9  11  -2    1.19    0.42 
   9  11  -2    1.25    0.32 
  -8 -11   2    5.26    0.60 
  -8 -11   2    4.22    0.63 
  -8 -11   2    4.78    0.63 
   8 -11  -2    4.45    0.46 
   8 -11  -2    3.61    0.50 
   8 -11  -2    4.11    0.46 
   8  11  -2    4.42    0.54 
   8  11  -2    4.41    0.68 
   7 -11  -2    5.86    0.44 
  -7 -11   2    6.48    0.64 
  -7 -11   2    5.62    0.67 
   7 -11  -2    5.56    0.58 
   7 -11  -2    6.60    0.45 
  -7 -11   2    6.53    0.70 
   7  11  -2    5.42    0.71 
   7  11  -2    5.92    0.59 
   6 -11  -2    0.35    0.13 
  -6 -11   2    0.36    0.20 
   6 -11  -2    0.34    0.13 
  -6 -11   2    0.36    0.18 
  -6 -11   2    0.37    0.18 
   6 -11  -2    0.36    0.18 
   6  11  -2    0.17    0.16 
   6  11  -2    0.37    0.17 
  -5 -11   2   -0.05    0.08 
   5 -11  -2    0.00    0.07 
  -5 -11   2    0.03    0.11 
  -5 -11   2    0.14    0.15 
   5 -11  -2    0.00    0.12 
   5 -11  -2    0.03    0.07 
   5  11  -2   -0.03    0.10 
   5  11  -2    0.01    0.14 
  -5  11   2   -0.01    0.09 
   4 -11  -2    2.81    0.29 
  -4 -11   2    2.63    0.32 
   4 -11  -2    3.84    0.36 
  -4 -11   2    3.11    0.41 
  -4 -11   2    2.34    0.34 
   4 -11  -2    2.78    0.29 
   4 -11  -2    3.14    0.38 
   4  11  -2    3.25    0.43 
  -4  11   2    3.48    0.35 
   4  11  -2    3.46    0.36 
   3 -11  -2    6.81    0.47 
  -3 -11   2    7.96    0.43 
  -3 -11   2    7.36    0.50 
  -3 -11   2    7.03    0.43 
  -3 -11   2    7.30    0.53 
   3 -11  -2    7.92    0.40 
   3 -11  -2    8.04    0.41 
  -3 -11   2    7.46    0.48 
   3 -11  -2    7.39    0.42 
  -3  11   2    7.75    0.45 
   3  11  -2    7.64    0.54 
   3  11  -2    7.49    0.42 
  -2 -11   2   31.91    1.20 
   2 -11  -2   31.46    1.24 
  -2 -11   2   30.55    1.13 
   2 -11  -2   31.98    1.19 
  -2 -11   2   32.11    1.23 
  -2 -11   2   31.61    1.25 
   2 -11  -2   31.80    1.11 
   2 -11  -2   31.38    1.13 
  -2 -11   2   33.26    1.20 
   2  11  -2   31.06    1.10 
   2  11  -2   29.98    1.27 
  -2  11   2   32.01    1.20 
  -2  11   2   32.35    1.26 
  -1 -11   2   15.43    0.70 
  -1 -11   2   14.54    0.58 
   1 -11  -2   14.80    0.70 
  -1 -11   2   14.39    0.62 
   1 -11  -2   13.79    0.61 
  -1 -11   2   14.25    0.65 
   1 -11  -2   14.53    0.66 
  -1 -11   2   14.32    0.65 
   1 -11  -2   14.78    0.69 
  -1  11   2   15.71    0.70 
   1  11  -2   15.23    0.71 
   1  11  -2   14.19    0.53 
  -1  11   2   14.47    0.73 
   0 -11  -2   68.99    2.29 
   0 -11   2   69.32    2.34 
   0 -11   2   68.39    2.18 
   0 -11  -2   70.08    2.36 
   0 -11  -2   67.37    2.27 
   0 -11   2   69.58    2.15 
   0 -11   2   68.87    2.19 
   0 -11   2   68.28    2.14 
   0 -11  -2   68.94    2.32 
   0  11   2   70.36    2.34 
   0  11   2   66.81    2.39 
   0  11  -2   68.37    2.29 
  -1 -11  -2    6.06    0.46 
  -1 -11  -2    6.77    0.47 
   1 -11   2    7.45    0.48 
   1 -11   2    7.00    0.25 
  -1 -11  -2    6.03    0.38 
   1 -11   2    6.39    0.29 
   1 -11   2    6.90    0.30 
  -1 -11  -2    6.64    0.46 
   1 -11   2    6.86    0.31 
   1  11   2    7.54    0.51 
   1  11   2    6.87    0.50 
  -1  11  -2    6.87    0.41 
   1  11   2    6.60    0.46 
   1  11   2    6.51    0.48 
  -2 -11  -2   12.39    0.58 
   2 -11   2   12.75    0.44 
  -2 -11  -2   12.39    0.73 
   2 -11   2   13.27    0.71 
   2 -11   2   12.79    0.46 
   2 -11   2   12.41    0.46 
  -2 -11  -2   12.71    0.73 
   2 -11   2   12.50    0.44 
   2  11   2   13.42    0.72 
  -2  11  -2   12.95    0.59 
   2  11   2   12.75    0.74 
   2  11   2   12.70    0.75 
  -3 -11  -2    0.03    0.07 
  -3 -11  -2    0.17    0.13 
   3 -11   2    0.12    0.06 
   3 -11   2    0.12    0.05 
   3 -11   2    0.10    0.12 
  -3 -11  -2    0.15    0.15 
   3 -11   2    0.08    0.05 
   3 -11   2    0.01    0.05 
   3  11   2    0.05    0.13 
   3  11   2   -0.01    0.13 
   3  11   2    0.04    0.12 
   4 -11   2    0.19    0.09 
   4 -11   2    0.34    0.08 
  -4 -11  -2    0.21    0.09 
   4 -11   2    0.14    0.15 
   4 -11   2    0.40    0.09 
  -4 -11  -2    0.38    0.20 
  -4 -11  -2    0.28    0.16 
  -4 -11  -2    0.13    0.15 
   4  11   2    0.45    0.23 
   4  11   2    0.16    0.17 
   4  11   2    0.25    0.17 
   5 -11   2    9.47    0.44 
  -5 -11  -2    8.87    0.70 
   5 -11   2    9.83    0.44 
  -5 -11  -2    7.98    0.61 
  -5 -11  -2   10.63    0.76 
   5 -11   2    8.21    0.61 
   5 -11   2    8.53    0.51 
   5  11   2    8.41    0.65 
   5  11   2    8.74    0.70 
  -6 -11  -2    7.12    0.73 
   6 -11   2    6.26    0.39 
   6 -11   2    6.00    0.37 
  -6 -11  -2    7.41    0.80 
  -6 -11  -2    5.42    0.67 
   6 -11   2    6.84    0.67 
   6  11   2    6.86    0.75 
   6  11   2    6.53    0.77 
  -7 -11  -2    3.29    0.55 
  -7 -11  -2    2.06    0.45 
  -7 -11  -2    2.65    0.46 
   7 -11   2    3.01    0.33 
   7 -11   2    2.81    0.32 
   7  11   2    2.59    0.46 
   7  11   2    2.10    0.46 
   8 -11   2    0.15    0.12 
   8 -11   2    0.05    0.12 
  -8 -11  -2   -0.03    0.20 
  -8 -11  -2    0.13    0.21 
   8  11   2    0.07    0.19 
   8  11   2    0.15    0.19 
  -9 -11  -2    5.35    0.72 
  -9 -11  -2    5.52    0.77 
   9 -11   2    5.30    0.53 
   9 -11   2    6.21    0.47 
   9  11   2    6.53    0.87 
   9  11   2    5.16    0.72 
  10 -11   2    1.46    0.30 
 -10 -11  -2    0.87    0.39 
  10 -11   2    1.03    0.27 
 -10 -11  -2    0.80    0.34 
  10  11   2    1.32    0.42 
  10  11   2    0.88    0.33 
  11 -11   2    1.91    0.36 
 -11 -11  -2    2.69    0.56 
  11 -11   2    1.91    0.38 
 -11 -11  -2    1.87    0.51 
  11  11   2    2.07    0.47 
 -11 -12   2    0.04    0.24 
  11 -12  -2    0.62    0.25 
  11 -12  -2    0.86    0.28 
 -11 -12   2    0.42    0.30 
  11  12  -2    0.15    0.34 
  11  12  -2    0.36    0.26 
 -10 -12   2    5.63    0.80 
  10 -12  -2    5.80    0.61 
 -10 -12   2    5.25    0.68 
  10 -12  -2    4.28    0.54 
  10  12  -2    5.03    0.79 
  10  12  -2    5.54    0.67 
   9 -12  -2    4.22    0.51 
   9 -12  -2    5.52    0.56 
  -9 -12   2    5.05    0.72 
  -9 -12   2    4.68    0.62 
   9  12  -2    6.34    0.67 
   9  12  -2    5.23    0.76 
  -8 -12   2   13.98    0.94 
  -8 -12   2   13.28    0.95 
   8 -12  -2   12.94    0.85 
   8 -12  -2   14.83    0.78 
   8 -12  -2   14.77    0.76 
  -8 -12   2   13.21    0.84 
   8  12  -2   13.83    0.84 
   8  12  -2   11.94    0.95 
   7 -12  -2    0.41    0.16 
  -7 -12   2    0.57    0.21 
  -7 -12   2    0.13    0.18 
  -7 -12   2    0.18    0.19 
   7 -12  -2    1.10    0.23 
   7 -12  -2    0.59    0.23 
   7  12  -2    0.21    0.20 
   7  12  -2    0.89    0.26 
  -6 -12   2    3.12    0.47 
   6 -12  -2    4.04    0.33 
   6 -12  -2    4.11    0.48 
  -6 -12   2    4.26    0.55 
   6 -12  -2    3.73    0.38 
  -6 -12   2    3.31    0.43 
   6  12  -2    2.76    0.47 
   6  12  -2    3.85    0.45 
  -5 -12   2   11.68    0.74 
   5 -12  -2   11.82    0.72 
   5 -12  -2   12.27    0.59 
  -5 -12   2   13.41    0.71 
   5 -12  -2   11.31    0.59 
  -5 -12   2   12.94    0.79 
   5  12  -2   11.32    0.65 
   5  12  -2   11.04    0.77 
  -4 -12   2   40.80    1.60 
   4 -12  -2   39.67    1.58 
   4 -12  -2   38.97    1.40 
   4 -12  -2   37.79    1.42 
  -4 -12   2   39.14    1.40 
  -4 -12   2   41.37    1.52 
  -4 -12   2   42.09    1.64 
   4  12  -2   41.57    1.68 
   4  12  -2   39.74    1.48 
  -4  12   2   41.02    1.47 
   3 -12  -2   12.75    0.57 
   3 -12  -2   12.26    0.60 
   3 -12  -2   12.59    0.69 
  -3 -12   2   13.18    0.62 
  -3 -12   2   12.52    0.67 
  -3 -12   2   11.85    0.71 
  -3 -12   2   12.08    0.60 
   3 -12  -2   12.85    0.57 
  -3 -12   2   11.06    0.67 
   3  12  -2   12.83    0.59 
  -3  12   2   11.79    0.61 
   3  12  -2   12.27    0.73 
   2 -12  -2    2.70    0.34 
   2 -12  -2    2.71    0.26 
  -2 -12   2    2.97    0.37 
  -2 -12   2    2.85    0.32 
  -2 -12   2    3.18    0.30 
   2 -12  -2    2.98    0.30 
  -2 -12   2    3.03    0.35 
   2 -12  -2    2.35    0.29 
  -2 -12   2    2.56    0.31 
   2  12  -2    2.86    0.22 
  -2  12   2    2.84    0.33 
   2  12  -2    2.82    0.37 
  -2  12   2    2.67    0.34 
  -1 -12   2    8.92    0.42 
   1 -12  -2    8.86    0.53 
  -1 -12   2    8.66    0.52 
  -1 -12   2    9.28    0.49 
   1 -12  -2    9.03    0.50 
  -1 -12   2    9.06    0.46 
  -1 -12   2    9.39    0.50 
   1 -12  -2    9.17    0.46 
   1 -12  -2    8.36    0.51 
  -1  12   2    8.90    0.57 
   1  12  -2    9.10    0.37 
   1  12  -2    9.62    0.56 
  -1  12   2    9.44    0.53 
   0 -12  -2    6.83    0.44 
   0 -12   2    5.23    0.33 
   0 -12  -2    6.26    0.45 
   0 -12  -2    6.82    0.42 
   0 -12   2    6.44    0.44 
   0 -12   2    5.61    0.31 
   0 -12  -2    6.72    0.42 
   0 -12   2    6.09    0.31 
   0  12   2    6.63    0.49 
   0  12   2    5.40    0.41 
   0  12  -2    5.69    0.40 
  -1 -12  -2    0.29    0.15 
   1 -12   2    0.65    0.12 
  -1 -12  -2    0.29    0.13 
   1 -12   2    0.58    0.11 
  -1 -12  -2    0.42    0.13 
  -1 -12  -2    0.52    0.18 
   1 -12   2    0.50    0.07 
   1 -12   2    0.60    0.17 
   1 -12   2    0.37    0.08 
  -1  12  -2    0.46    0.15 
   1  12   2    0.42    0.16 
   1  12   2    0.31    0.17 
   1  12   2    0.57    0.18 
   1  12   2    0.53    0.20 
   1  12   2    0.59    0.19 
   2 -12   2    3.72    0.21 
   2 -12   2    3.99    0.20 
   2 -12   2    3.84    0.18 
  -2 -12  -2    3.19    0.32 
   2 -12   2    4.22    0.21 
   2 -12   2    4.11    0.46 
  -2 -12  -2    4.87    0.54 
  -2 -12  -2    4.92    0.54 
  -2  12  -2    3.58    0.30 
   2  12   2    4.23    0.49 
   2  12   2    4.88    0.49 
   2  12   2    3.81    0.46 
  -3 -12  -2   -0.12    0.10 
   3 -12   2    0.00    0.04 
  -3 -12  -2   -0.09    0.09 
   3 -12   2    0.04    0.05 
   3 -12   2   -0.03    0.12 
  -3 -12  -2    0.05    0.14 
   3 -12   2    0.08    0.06 
  -3 -12  -2    0.04    0.07 
   3  12   2   -0.09    0.10 
   3  12   2   -0.01    0.15 
   3  12   2    0.03    0.13 
  -3  12  -2    0.00    0.08 
   4 -12   2    0.37    0.09 
  -4 -12  -2    0.45    0.22 
   4 -12   2    0.35    0.19 
   4 -12   2    0.65    0.12 
  -4 -12  -2    0.38    0.21 
  -4 -12  -2    0.51    0.13 
  -4 -12  -2    0.51    0.19 
   4 -12   2    0.58    0.13 
   4  12   2    0.05    0.14 
   4  12   2    0.35    0.18 
  -5 -12  -2    3.42    0.51 
   5 -12   2    3.78    0.25 
   5 -12   2    4.08    0.52 
   5 -12   2    3.97    0.38 
  -5 -12  -2    4.37    0.59 
   5 -12   2    3.74    0.26 
  -5 -12  -2    2.96    0.46 
   5  12   2    2.77    0.48 
   5  12   2    2.80    0.46 
  -6 -12  -2   16.01    0.96 
  -6 -12  -2   16.02    1.03 
   6 -12   2   17.05    0.96 
   6 -12   2   15.55    0.69 
  -6 -12  -2   19.33    1.11 
   6 -12   2   16.07    0.70 
   6  12   2   15.98    1.04 
   6  12   2   15.96    0.97 
  -7 -12  -2    0.83    0.31 
   7 -12   2    1.07    0.20 
  -7 -12  -2    0.89    0.30 
  -7 -12  -2    0.81    0.31 
   7 -12   2    1.08    0.21 
   7  12   2    1.16    0.34 
   7  12   2    0.58    0.28 
  -8 -12  -2    5.54    0.70 
   8 -12   2    4.58    0.37 
   8 -12   2    4.87    0.39 
  -8 -12  -2    3.88    0.63 
   8  12   2    2.91    0.57 
   8  12   2    3.76    0.59 
  -9 -12  -2   -0.20    0.21 
   9 -12   2    0.09    0.13 
   9 -12   2    0.02    0.12 
  -9 -12  -2    0.03    0.21 
   9  12   2   -0.03    0.25 
   9  12   2   -0.07    0.18 
 -10 -12  -2    3.06    0.57 
  10 -12   2    3.60    0.46 
 -10 -12  -2    2.73    0.60 
  10 -12   2    2.96    0.42 
  10  12   2    2.97    0.65 
  10  12   2    3.37    0.58 
  10 -13  -2    3.70    0.50 
 -10 -13   2    3.81    0.60 
  10 -13  -2    4.21    0.52 
 -10 -13   2    3.30    0.62 
  10  13  -2    3.24    0.67 
  10  13  -2    3.83    0.57 
   9 -13  -2    0.01    0.13 
  -9 -13   2   -0.20    0.17 
  -9 -13   2    0.01    0.15 
   9 -13  -2    0.05    0.13 
   9  13  -2    0.11    0.25 
   9  13  -2   -0.01    0.17 
  -8 -13   2    0.24    0.24 
   8 -13  -2    0.52    0.18 
   8 -13  -2    0.34    0.20 
   8 -13  -2    0.52    0.19 
  -8 -13   2    0.53    0.24 
  -8 -13   2    0.51    0.26 
   8  13  -2    0.69    0.32 
   8  13  -2    0.72    0.25 
   7 -13  -2    0.26    0.15 
  -7 -13   2    0.93    0.26 
   7 -13  -2    0.76    0.20 
  -7 -13   2    1.07    0.33 
  -7 -13   2    0.89    0.30 
   7 -13  -2    1.04    0.29 
   7  13  -2    0.39    0.25 
   7  13  -2    0.86    0.26 
   6 -13  -2   12.94    0.66 
   6 -13  -2   12.56    0.80 
  -6 -13   2   13.97    0.88 
  -6 -13   2   12.53    0.75 
   6 -13  -2   12.34    0.65 
  -6 -13   2   13.64    0.84 
   6  13  -2   14.03    0.93 
   6  13  -2   12.38    0.73 
   5 -13  -2    1.69    0.25 
  -5 -13   2    1.61    0.33 
  -5 -13   2    1.37    0.28 
  -5 -13   2    2.08    0.38 
   5 -13  -2    2.08    0.28 
   5 -13  -2    1.70    0.33 
   5  13  -2    2.55    0.44 
   5  13  -2    2.24    0.33 
  -4 -13   2   23.91    1.02 
   4 -13  -2   23.78    0.94 
  -4 -13   2   23.61    1.10 
   4 -13  -2   24.23    1.11 
   4 -13  -2   23.61    0.96 
  -4 -13   2   23.17    1.12 
  -4 -13   2   24.00    0.95 
   4  13  -2   23.04    1.17 
   4  13  -2   23.14    0.99 
  -3 -13   2    3.10    0.41 
   3 -13  -2    3.35    0.33 
  -3 -13   2    3.85    0.43 
   3 -13  -2    2.96    0.33 
   3 -13  -2    2.65    0.38 
   3 -13  -2    3.80    0.28 
  -3 -13   2    3.77    0.37 
  -3 -13   2    3.54    0.36 
   3  13  -2    3.61    0.45 
   3  13  -2    3.50    0.29 
  -3  13   2    3.94    0.44 
  -3  13   2    3.27    0.36 
   2 -13  -2   19.94    0.89 
  -2 -13   2   19.67    0.92 
  -2 -13   2   21.74    0.94 
   2 -13  -2   20.38    0.80 
   2 -13  -2   20.51    0.95 
  -2 -13   2   22.58    0.84 
  -2 -13   2   20.83    0.89 
   2 -13  -2   19.07    0.83 
  -2 -13   2   20.26    0.89 
  -2 -13   2   18.87    0.91 
  -2  13   2   18.58    0.94 
   2  13  -2   19.60    0.97 
  -2  13   2   19.58    0.87 
   2  13  -2   20.82    0.78 
   1 -13  -2   -0.05    0.06 
  -1 -13   2    0.03    0.07 
  -1 -13   2    0.19    0.10 
   1 -13  -2    0.17    0.11 
   1 -13  -2   -0.06    0.08 
  -1 -13   2    0.06    0.10 
   1 -13  -2    0.12    0.10 
  -1 -13   2    0.04    0.07 
  -1 -13   2    0.13    0.09 
  -1  13   2    0.03    0.10 
   1  13  -2    0.10    0.11 
  -1  13   2    0.02    0.11 
   1  13  -2    0.17    0.07 
   0 -13   2   14.52    0.64 
   0 -13  -2   15.87    0.77 
   0 -13  -2   14.08    0.77 
   0 -13   2   14.37    0.61 
   0 -13   2   15.00    0.77 
   0 -13  -2   15.05    0.73 
   0 -13   2   15.44    0.60 
   0 -13  -2   14.59    0.70 
   0  13   2   15.35    0.76 
   0  13  -2   14.86    0.74 
   0  13   2   15.29    0.82 
   1 -13   2    5.85    0.31 
   1 -13   2    5.86    0.32 
  -1 -13  -2    6.16    0.45 
   1 -13   2    5.76    0.29 
   1 -13   2    5.95    0.46 
  -1 -13  -2    5.89    0.48 
  -1 -13  -2    5.68    0.55 
   1 -13   2    5.95    0.24 
  -1 -13  -2    6.00    0.40 
   1  13   2    6.13    0.47 
   1  13   2    6.58    0.52 
   1  13   2    5.87    0.46 
  -1  13  -2    5.57    0.40 
   2 -13   2    0.47    0.09 
   2 -13   2    0.47    0.09 
  -2 -13  -2    0.35    0.18 
  -2 -13  -2    0.46    0.14 
   2 -13   2    0.46    0.07 
   2 -13   2    0.69    0.11 
  -2 -13  -2    0.31    0.16 
   2 -13   2    0.21    0.14 
   2  13   2    0.82    0.24 
  -2  13  -2    0.47    0.15 
   2  13   2    0.23    0.17 
  -3 -13  -2    8.31    0.56 
   3 -13   2    8.09    0.35 
   3 -13   2    7.73    0.34 
  -3 -13  -2    8.83    0.65 
   3 -13   2    8.60    0.37 
  -3 -13  -2    8.50    0.64 
  -3 -13  -2    7.85    0.45 
   3 -13   2    7.80    0.57 
  -3  13  -2    8.26    0.48 
   3  13   2    6.29    0.53 
   3  13   2    7.59    0.62 
   4 -13   2    0.11    0.16 
   4 -13   2    0.28    0.08 
   4 -13   2    0.29    0.10 
  -4 -13  -2    0.05    0.14 
  -4 -13  -2    0.10    0.13 
  -4 -13  -2    0.45    0.13 
  -4 -13  -2    0.13    0.17 
   4 -13   2    0.22    0.08 
   4  13   2    0.12    0.16 
   4  13   2    0.00    0.14 
   5 -13   2    1.85    0.26 
  -5 -13  -2    1.36    0.37 
   5 -13   2    1.47    0.32 
  -5 -13  -2    1.77    0.40 
   5 -13   2    1.65    0.20 
  -5 -13  -2    2.21    0.40 
   5 -13   2    1.35    0.18 
   5  13   2    2.03    0.45 
   5  13   2    2.16    0.41 
   6 -13   2   18.65    1.04 
   6 -13   2   17.15    0.73 
  -6 -13  -2   17.57    1.10 
  -6 -13  -2   20.27    1.08 
   6 -13   2   17.60    0.75 
  -6 -13  -2   16.60    1.09 
   6  13   2   17.25    1.12 
   6  13   2   18.37    1.07 
   7 -13   2    5.44    0.38 
   7 -13   2    5.59    0.67 
  -7 -13  -2    5.46    0.74 
  -7 -13  -2    5.92    0.71 
  -7 -13  -2    5.62    0.74 
   7 -13   2    5.06    0.38 
   7  13   2    6.21    0.73 
   7  13   2    7.05    0.87 
  -8 -13  -2    0.41    0.25 
  -8 -13  -2    0.38    0.26 
   8 -13   2    0.15    0.12 
   8 -13   2    0.16    0.11 
   8  13   2    0.28    0.27 
   8  13   2    0.11    0.23 
   9 -13   2    3.31    0.40 
   9 -13   2    4.70    0.50 
  -9 -13  -2    3.50    0.59 
  -9 -13  -2    3.18    0.59 
   9  13   2    3.77    0.69 
   9  13   2    4.26    0.64 
  10 -13   2    0.37    0.19 
 -10 -13  -2   -0.05    0.24 
  10 -13   2    0.59    0.20 
 -10 -13  -2    0.29    0.30 
  10  13   2    0.31    0.26 
  10  13   2    0.47    0.33 
  10 -14  -2    0.45    0.21 
  10 -14  -2    0.42    0.21 
 -10 -14   2    0.73    0.38 
 -10 -14   2    0.70    0.31 
  10  14  -2    0.61    0.36 
   9 -14  -2    1.43    0.31 
   9 -14  -2    1.24    0.28 
  -9 -14   2    1.20    0.35 
  -9 -14   2    1.28    0.40 
   9  14  -2    0.76    0.36 
   8 -14  -2    0.51    0.25 
  -8 -14   2    0.89    0.28 
   8 -14  -2    0.97    0.24 
  -8 -14   2    1.12    0.37 
   8 -14  -2    0.91    0.24 
  -8 -14   2    0.86    0.35 
   8  14  -2    0.74    0.32 
   8  14  -2    1.35    0.33 
   7 -14  -2    2.22    0.42 
  -7 -14   2    1.20    0.32 
   7 -14  -2    1.62    0.27 
  -7 -14   2    1.88    0.41 
   7 -14  -2    1.98    0.30 
  -7 -14   2    2.31    0.46 
   7  14  -2    1.65    0.41 
   7  14  -2    1.92    0.34 
   6 -14  -2   -0.10    0.13 
  -6 -14   2   -0.05    0.12 
  -6 -14   2   -0.09    0.14 
   6 -14  -2   -0.07    0.08 
  -6 -14   2    0.00    0.13 
   6 -14  -2   -0.03    0.08 
   6  14  -2   -0.17    0.11 
   6  14  -2   -0.15    0.11 
   5 -14  -2    1.70    0.25 
  -5 -14   2    1.21    0.28 
  -5 -14   2    1.16    0.32 
   5 -14  -2    1.60    0.26 
   5 -14  -2    0.95    0.26 
  -5 -14   2    1.54    0.30 
   5  14  -2    2.18    0.33 
   5  14  -2    0.83    0.29 
  -4 -14   2    0.15    0.11 
  -4 -14   2    0.13    0.14 
  -4 -14   2    0.26    0.13 
   4 -14  -2    0.24    0.12 
   4 -14  -2    0.71    0.24 
   4 -14  -2    0.30    0.13 
  -4 -14   2    0.15    0.16 
   4  14  -2    0.07    0.15 
   4  14  -2    0.25    0.13 
   3 -14  -2    0.58    0.16 
  -3 -14   2    0.56    0.15 
  -3 -14   2    0.78    0.23 
   3 -14  -2    0.64    0.22 
  -3 -14   2    0.55    0.19 
  -3 -14   2    0.33    0.15 
   3 -14  -2    0.44    0.15 
  -3  14   2    0.60    0.21 
   3  14  -2    0.83    0.24 
   3  14  -2    0.63    0.15 
  -2 -14   2   13.29    0.71 
   2 -14  -2   12.04    0.57 
  -2 -14   2   12.76    0.66 
   2 -14  -2   12.09    0.62 
   2 -14  -2   12.49    0.72 
  -2 -14   2   13.82    0.70 
   2 -14  -2   14.11    0.70 
  -2 -14   2   14.04    0.61 
  -2 -14   2   11.96    0.69 
   2  14  -2   12.62    0.56 
  -2  14   2   12.00    0.65 
  -2  14   2   13.13    0.74 
   2  14  -2   13.56    0.76 
   1 -14  -2   12.81    0.66 
  -1 -14   2   12.93    0.69 
  -1 -14   2   12.47    0.60 
   1 -14  -2   12.47    0.69 
  -1 -14   2   11.98    0.63 
   1 -14  -2   12.44    0.59 
  -1 -14   2   12.53    0.62 
   1 -14  -2   12.24    0.68 
  -1 -14   2   12.07    0.53 
  -1  14   2   10.94    0.70 
  -1  14   2   12.45    0.65 
   1  14  -2   12.79    0.71 
   0 -14  -2    0.06    0.10 
   0 -14   2   -0.03    0.07 
   0 -14   2    0.03    0.07 
   0 -14  -2    0.02    0.10 
   0 -14   2    0.01    0.06 
   0 -14   2    0.00    0.09 
   0 -14  -2   -0.03    0.10 
   0 -14  -2   -0.06    0.09 
   0  14   2    0.13    0.15 
   0  14   2    0.06    0.10 
   0  14  -2    0.19    0.14 
   1 -14   2    0.83    0.09 
  -1 -14  -2    0.46    0.18 
  -1 -14  -2    0.10    0.15 
   1 -14   2    0.24    0.08 
  -1 -14  -2    0.33    0.14 
   1 -14   2    0.06    0.13 
   1 -14   2    0.34    0.11 
  -1  14  -2    0.23    0.14 
   1  14   2    0.36    0.17 
   1  14   2    0.16    0.15 
   1  14   2    0.36    0.18 
   2 -14   2    3.39    0.17 
  -2 -14  -2    3.84    0.38 
  -2 -14  -2    3.22    0.47 
  -2 -14  -2    2.78    0.41 
   2 -14   2    3.25    0.21 
  -2 -14  -2    3.40    0.40 
   2 -14   2    2.60    0.37 
   2 -14   2    3.34    0.21 
  -2  14  -2    3.74    0.40 
   2  14   2    3.62    0.51 
   2  14   2    4.53    0.51 
   3 -14   2    0.36    0.10 
   3 -14   2    0.34    0.20 
   3 -14   2    0.54    0.10 
  -3 -14  -2    0.19    0.17 
   3 -14   2    0.25    0.07 
  -3 -14  -2    0.11    0.14 
  -3 -14  -2    0.54    0.15 
  -3 -14  -2    0.82    0.28 
  -3  14  -2    0.36    0.15 
   3  14   2    0.58    0.21 
   3  14   2    0.23    0.19 
   4 -14   2    8.05    0.41 
  -4 -14  -2    8.57    0.69 
  -4 -14  -2    7.48    0.46 
   4 -14   2    8.42    0.39 
   4 -14   2    8.34    0.38 
  -4 -14  -2    7.10    0.74 
   4 -14   2    8.57    0.64 
  -4 -14  -2    7.72    0.60 
   4  14   2    9.34    0.73 
   4  14   2    7.56    0.62 
   5 -14   2    0.22    0.13 
   5 -14   2    0.25    0.10 
  -5 -14  -2    0.53    0.26 
  -5 -14  -2    0.11    0.21 
   5 -14   2    0.32    0.11 
  -5 -14  -2    0.34    0.20 
   5 -14   2    0.57    0.26 
   5  14   2    0.60    0.26 
   5  14   2    0.33    0.20 
  -6 -14  -2    3.21    0.51 
   6 -14   2    3.40    0.26 
   6 -14   2    2.91    0.30 
  -6 -14  -2    2.61    0.51 
   6 -14   2    2.85    0.48 
  -6 -14  -2    2.71    0.53 
   6  14   2    3.06    0.55 
   6  14   2    3.04    0.53 
  -7 -14  -2    0.34    0.23 
  -7 -14  -2    0.37    0.26 
   7 -14   2    0.88    0.31 
   7 -14   2    1.00    0.19 
  -7 -14  -2    1.00    0.36 
   7 -14   2    0.72    0.18 
   7  14   2    1.00    0.33 
   7  14   2    0.83    0.37 
  -8 -14  -2    6.33    0.75 
   8 -14   2    6.50    0.45 
  -8 -14  -2    6.63    0.85 
   8 -14   2    5.90    0.43 
   8  14   2    5.92    0.82 
   8  14   2    6.19    0.76 
   9 -14   2    0.09    0.13 
  -9 -14  -2    0.21    0.25 
   9 -14   2    0.02    0.15 
  -9 -14  -2   -0.21    0.23 
   9  14   2    0.02    0.22 
   9  14   2    0.16    0.28 
 -10 -14  -2   10.64    1.17 
  10 -14   2   13.50    0.78 
 -10 -14  -2   12.83    0.99 
  10 -14   2   11.88    0.73 
  10  14   2   13.06    1.00 
  10  14   2   12.05    1.30 
  10 -15  -2    5.47    0.59 
 -10 -15   2    4.53    0.74 
 -10 -15   2    4.73    0.65 
  10 -15  -2    4.49    0.57 
  10  15  -2    4.57    0.75 
   9 -15  -2    0.06    0.15 
  -9 -15   2    0.11    0.23 
   9 -15  -2   -0.15    0.11 
  -9 -15   2   -0.11    0.15 
  -9 -15   2    0.10    0.24 
   9  15  -2   -0.01    0.22 
  -8 -15   2    7.29    0.83 
   8 -15  -2    7.81    0.56 
  -8 -15   2    8.34    0.85 
   8 -15  -2    9.19    0.91 
  -8 -15   2    7.48    0.75 
   8 -15  -2    8.59    0.58 
   8  15  -2    8.87    0.97 
  -7 -15   2    0.28    0.22 
  -7 -15   2    0.28    0.24 
   7 -15  -2    0.53    0.20 
   7 -15  -2    0.34    0.16 
   7 -15  -2    0.41    0.23 
  -7 -15   2    0.38    0.22 
   7  15  -2    0.18    0.20 
   6 -15  -2    1.52    0.26 
  -6 -15   2    1.79    0.38 
  -6 -15   2    1.89    0.36 
   6 -15  -2    1.91    0.29 
   6 -15  -2    1.53    0.36 
  -6 -15   2    1.60    0.37 
   6  15  -2    1.08    0.34 
   5 -15  -2    0.09    0.12 
   5 -15  -2    0.03    0.16 
  -5 -15   2   -0.05    0.11 
  -5 -15   2    0.12    0.14 
   5 -15  -2    0.42    0.14 
  -5 -15   2    0.07    0.15 
   5  15  -2    0.18    0.19 
  -4 -15   2   26.50    1.21 
  -4 -15   2   23.54    1.21 
  -4 -15   2   27.54    1.09 
   4 -15  -2   26.56    1.09 
  -4 -15   2   26.57    1.12 
   4 -15  -2   26.71    1.04 
   4 -15  -2   24.42    1.21 
   4  15  -2   24.54    1.28 
  -4  15   2   26.28    1.20 
  -3 -15   2    9.88    0.60 
  -3 -15   2    8.94    0.54 
  -3 -15   2    8.10    0.49 
   3 -15  -2    8.06    0.52 
   3 -15  -2    7.66    0.58 
  -3 -15   2    8.09    0.59 
   3 -15  -2    8.59    0.49 
  -3  15   2    8.26    0.59 
   3  15  -2    8.18    0.63 
   2 -15  -2   41.46    1.55 
  -2 -15   2   44.23    1.60 
   2 -15  -2   41.38    1.61 
  -2 -15   2   40.55    1.64 
   2 -15  -2   42.17    1.68 
  -2 -15   2   40.98    1.63 
  -2 -15   2   42.12    1.49 
  -2 -15   2   44.13    1.63 
   2  15  -2   42.94    1.72 
  -2  15   2   43.17    1.72 
  -1 -15   2    1.25    0.22 
  -1 -15   2    0.91    0.21 
   1 -15  -2    1.16    0.24 
   1 -15  -2    0.67    0.21 
  -1 -15   2    0.91    0.19 
   1 -15  -2    0.60    0.19 
  -1 -15   2    1.02    0.23 
  -1  15   2    0.77    0.25 
  -1  15   2    0.99    0.23 
   1  15  -2    0.97    0.24 
   0 -15  -2    0.01    0.10 
   0 -15   2    0.10    0.09 
   0 -15   2   -0.05    0.06 
   0 -15  -2    0.11    0.11 
   0 -15   2    0.04    0.07 
   0 -15   2    0.02    0.10 
   0 -15  -2   -0.02    0.10 
   0  15   2   -0.08    0.09 
   0  15  -2   -0.03    0.11 
   0  15   2    0.13    0.13 
  -1 -15  -2   -0.01    0.09 
  -1 -15  -2    0.11    0.10 
  -1 -15  -2   -0.14    0.08 
  -1 -15  -2    0.11    0.14 
   1 -15   2    0.10    0.09 
   1 -15   2    0.01    0.06 
   1 -15   2   -0.02    0.10 
   1 -15   2    0.03    0.05 
   1  15   2    0.05    0.14 
  -1  15  -2    0.12    0.12 
   1  15   2   -0.04    0.12 
  -2 -15  -2    2.23    0.40 
   2 -15   2    2.56    0.15 
  -2 -15  -2    1.81    0.37 
   2 -15   2    2.65    0.19 
   2 -15   2    2.77    0.40 
   2 -15   2    2.60    0.20 
  -2 -15  -2    2.54    0.32 
  -2 -15  -2    2.72    0.37 
  -2  15  -2    2.87    0.36 
   2  15   2    2.43    0.42 
   2  15   2    2.31    0.37 
   3 -15   2    7.55    0.36 
   3 -15   2    8.98    0.65 
  -3 -15  -2    8.58    0.58 
  -3 -15  -2    8.98    0.69 
  -3 -15  -2    8.43    0.83 
   3 -15   2    7.36    0.37 
   3 -15   2    7.85    0.35 
  -3 -15  -2    7.66    0.49 
   3  15   2    8.74    0.63 
   3  15   2    8.68    0.69 
  -3  15  -2    8.27    0.53 
  -4 -15  -2    0.01    0.10 
   4 -15   2    0.01    0.15 
   4 -15   2   -0.04    0.07 
  -4 -15  -2    0.12    0.18 
   4 -15   2    0.01    0.06 
   4 -15   2    0.05    0.07 
  -4 -15  -2   -0.13    0.15 
  -4 -15  -2   -0.04    0.11 
   4  15   2   -0.04    0.15 
  -4  15  -2   -0.02    0.10 
   4  15   2   -0.04    0.14 
  -5 -15  -2    1.50    0.38 
   5 -15   2    2.45    0.24 
  -5 -15  -2    2.18    0.39 
   5 -15   2    2.19    0.23 
  -5 -15  -2    1.74    0.41 
   5 -15   2    2.68    0.46 
   5  15   2    1.34    0.41 
   5  15   2    1.59    0.36 
  -6 -15  -2    0.58    0.30 
   6 -15   2    0.68    0.15 
   6 -15   2    0.92    0.31 
   6 -15   2    0.57    0.15 
  -6 -15  -2    0.59    0.26 
  -6 -15  -2    1.02    0.36 
   6  15   2    0.82    0.34 
   6  15   2    0.69    0.29 
   7 -15   2    3.29    0.35 
   7 -15   2    2.50    0.29 
  -7 -15  -2    2.97    0.58 
  -7 -15  -2    2.94    0.52 
   7 -15   2    3.31    0.56 
  -7 -15  -2    3.42    0.59 
   7  15   2    4.00    0.59 
   7  15   2    2.29    0.50 
  -8 -15  -2    0.19    0.24 
  -8 -15  -2    0.47    0.29 
   8 -15   2    0.36    0.16 
   8 -15   2    0.16    0.13 
   8  15   2    0.12    0.24 
   8  15   2    0.43    0.29 
   9 -15   2    1.05    0.25 
   9 -15   2    0.85    0.21 
  -9 -15  -2    1.64    0.43 
  -9 -15  -2    0.80    0.38 
   9  15   2    1.38    0.47 
   9  15   2    1.59    0.42 
 -10 -15  -2    2.80    0.62 
  10 -15   2    2.32    0.35 
 -10 -15  -2    2.19    0.55 
  10 -15   2    2.34    0.38 
  10  15   2    2.47    0.53 
  10  15   2    2.40    0.59 
 -10 -16   2    0.13    0.28 
  10 -16  -2    0.24    0.21 
  10 -16  -2    0.12    0.17 
 -10 -16   2   -0.09    0.21 
  10  16  -2    0.21    0.30 
   9 -16  -2    3.36    0.46 
  -9 -16   2    2.57    0.46 
  -9 -16   2    4.06    0.66 
   9 -16  -2    3.12    0.42 
  -9 -16   2    3.02    0.59 
   9  16  -2    3.59    0.68 
  -8 -16   2    0.64    0.31 
   8 -16  -2    0.04    0.14 
   8 -16  -2    0.00    0.12 
  -8 -16   2    0.23    0.19 
  -8 -16   2    0.28    0.24 
   8 -16  -2    0.22    0.22 
   8  16  -2    0.01    0.24 
   7 -16  -2    0.15    0.13 
  -7 -16   2    0.14    0.21 
   7 -16  -2    0.01    0.17 
  -7 -16   2    0.36    0.24 
  -7 -16   2    0.46    0.23 
   7 -16  -2    0.26    0.16 
   7  16  -2    0.23    0.22 
   6 -16  -2    0.20    0.14 
  -6 -16   2    0.29    0.23 
  -6 -16   2    0.22    0.16 
   6 -16  -2    0.11    0.12 
   6 -16  -2    0.25    0.20 
  -6 -16   2    0.26    0.18 
   6  16  -2    0.16    0.19 
  -5 -16   2    0.47    0.22 
  -5 -16   2    0.20    0.17 
   5 -16  -2    0.45    0.22 
   5 -16  -2    0.53    0.15 
   5 -16  -2    0.74    0.20 
  -5 -16   2    0.82    0.24 
   5  16  -2    0.40    0.21 
   4 -16  -2    1.02    0.22 
  -4 -16   2    1.16    0.25 
  -4 -16   2    1.60    0.27 
  -4 -16   2    0.86    0.24 
   4 -16  -2    1.27    0.30 
   4 -16  -2    1.13    0.22 
  -4 -16   2    0.86    0.27 
   4  16  -2    1.13    0.32 
  -4  16   2    1.22    0.28 
  -3 -16   2   15.59    0.87 
   3 -16  -2   14.73    0.86 
  -3 -16   2   16.32    0.84 
  -3 -16   2   15.80    0.75 
   3 -16  -2   16.13    0.75 
   3 -16  -2   15.69    0.80 
  -3 -16   2   14.57    0.78 
  -3  16   2   14.77    0.87 
   3  16  -2   14.64    0.90 
   2 -16  -2   39.78    1.56 
   2 -16  -2   38.78    1.62 
  -2 -16   2   37.58    1.54 
  -2 -16   2   40.16    1.41 
   2 -16  -2   41.45    1.52 
  -2 -16   2   39.36    1.57 
  -2 -16   2   38.02    1.50 
  -2  16   2   39.54    1.65 
   2  16  -2   38.15    1.64 
   1 -16  -2    0.62    0.14 
   1 -16  -2    0.58    0.20 
   1 -16  -2    0.70    0.21 
  -1 -16   2    0.74    0.20 
  -1 -16   2    0.72    0.18 
   1 -16  -2    0.62    0.20 
  -1 -16   2    0.92    0.25 
  -1 -16   2    0.77    0.18 
  -1  16   2    0.53    0.22 
   1  16  -2    0.79    0.24 
   0 -16  -2   15.45    0.82 
   0 -16  -2   14.98    0.83 
   0 -16   2   16.95    0.66 
   0 -16   2   15.23    0.68 
   0 -16  -2   15.16    0.86 
   0 -16   2   16.46    0.88 
   0 -16  -2   15.32    0.70 
   0 -16   2   16.91    0.76 
   0  16   2   14.72    0.91 
   0  16  -2   17.00    0.86 
   1 -16   2    5.23    0.25 
  -1 -16  -2    4.64    0.54 
  -1 -16  -2    4.74    0.38 
   1 -16   2    5.00    0.30 
  -1 -16  -2    5.50    0.43 
  -1 -16  -2    5.43    0.61 
   1 -16   2    5.12    0.34 
   1 -16   2    4.63    0.53 
   1  16   2    5.46    0.64 
   1  16   2    5.54    0.56 
  -1  16  -2    5.17    0.52 
  -2 -16  -2    1.57    0.36 
   2 -16   2    1.39    0.11 
   2 -16   2    1.48    0.17 
  -2 -16  -2    1.11    0.25 
   2 -16   2    0.70    0.23 
   2 -16   2    1.34    0.19 
  -2 -16  -2    1.51    0.27 
  -2 -16  -2    1.50    0.34 
   2  16   2    1.81    0.34 
  -2  16  -2    1.11    0.25 
   2  16   2    1.70    0.39 
  -3 -16  -2    6.17    0.71 
   3 -16   2    6.67    0.34 
   3 -16   2    6.18    0.30 
   3 -16   2    6.89    0.34 
  -3 -16  -2    6.64    0.52 
  -3 -16  -2    6.55    0.71 
  -3 -16  -2    6.45    0.46 
   3 -16   2    8.21    0.76 
  -3  16  -2    6.35    0.48 
   3  16   2    7.19    0.70 
   3  16   2    8.70    0.86 
  -4 -16  -2    5.94    0.63 
  -4 -16  -2    5.00    0.68 
  -4 -16  -2    5.84    0.72 
  -4 -16  -2    5.47    0.41 
   4 -16   2    5.18    0.63 
   4 -16   2    5.79    0.31 
   4 -16   2    5.49    0.32 
   4 -16   2    5.56    0.32 
   4  16   2    4.29    0.63 
   4  16   2    5.48    0.61 
  -4  16  -2    5.97    0.56 
   5 -16   2    0.73    0.29 
  -5 -16  -2    1.21    0.37 
  -5 -16  -2    0.74    0.27 
   5 -16   2    0.76    0.15 
  -5 -16  -2    0.55    0.29 
   5 -16   2    1.10    0.18 
  -5  16  -2    0.93    0.24 
   5  16   2    1.23    0.35 
   5  16   2    0.72    0.33 
  -6 -16  -2    7.76    0.80 
   6 -16   2    7.92    0.43 
  -6 -16  -2    7.27    0.84 
   6 -16   2    7.54    0.43 
   6 -16   2    7.45    0.81 
  -6 -16  -2    7.33    0.84 
   6  16   2    8.55    0.87 
   6  16   2    6.29    0.82 
   7 -16   2   -0.14    0.09 
   7 -16   2   -0.06    0.21 
  -7 -16  -2    0.02    0.21 
   7 -16   2    0.04    0.10 
  -7 -16  -2    0.06    0.22 
  -7 -16  -2    0.16    0.24 
   7  16   2    0.12    0.24 
   7  16   2   -0.05    0.18 
   8 -16   2    4.16    0.43 
   8 -16   2    4.04    0.39 
  -8 -16  -2    4.37    0.74 
  -8 -16  -2    3.44    0.58 
   8  16   2    3.61    0.62 
   8  16   2    3.80    0.68 
   9 -16   2    2.61    0.36 
  -9 -16  -2    2.34    0.56 
  -9 -16  -2    2.92    0.55 
   9 -16   2    3.64    0.43 
   9  16   2    3.32    0.67 
   9  16   2    4.78    0.73 
  10 -16   2    4.34    0.46 
 -10 -16  -2    2.92    0.65 
  10 -16   2    5.01    0.54 
 -10 -16  -2    5.19    0.77 
 -10 -17   2    3.62    0.61 
  10 -17  -2    3.40    0.49 
  10 -17  -2    3.21    0.46 
   9 -17  -2    3.92    0.48 
  -9 -17   2    5.52    0.76 
  -9 -17   2    3.93    0.66 
  -9 -17   2    3.05    0.53 
   9 -17  -2    4.56    0.69 
   9 -17  -2    3.62    0.47 
   9  17  -2    4.25    0.75 
  -8 -17   2    0.12    0.19 
   8 -17  -2    0.12    0.15 
  -8 -17   2    0.24    0.25 
  -8 -17   2    0.19    0.26 
   8 -17  -2    0.26    0.18 
   8 -17  -2    0.06    0.20 
   8  17  -2    0.19    0.26 
  -7 -17   2    1.27    0.37 
   7 -17  -2    1.86    0.42 
  -7 -17   2    1.67    0.39 
  -7 -17   2    1.37    0.32 
   7 -17  -2    1.64    0.31 
   7 -17  -2    1.77    0.29 
   7  17  -2    2.41    0.55 
   6 -17  -2   15.00    0.77 
  -6 -17   2   15.99    0.89 
   6 -17  -2   14.49    0.96 
  -6 -17   2   15.64    0.97 
  -6 -17   2   15.49    1.02 
   6 -17  -2   16.36    0.82 
   6  17  -2   15.22    1.06 
   5 -17  -2    0.05    0.15 
   5 -17  -2   -0.06    0.10 
   5 -17  -2    0.06    0.11 
  -5 -17   2    0.00    0.15 
  -5 -17   2   -0.13    0.10 
  -5 -17   2   -0.14    0.13 
   5  17  -2   -0.25    0.16 
  -5  17   2   -0.19    0.11 
  -4 -17   2    1.52    0.28 
   4 -17  -2    1.36    0.31 
   4 -17  -2    1.61    0.30 
   4 -17  -2    1.29    0.24 
  -4 -17   2    1.06    0.33 
  -4 -17   2    1.14    0.28 
  -4  17   2    1.33    0.32 
   4  17  -2    1.42    0.37 
   3 -17  -2    3.70    0.50 
   3 -17  -2    3.25    0.41 
  -3 -17   2    2.98    0.42 
   3 -17  -2    3.32    0.39 
  -3 -17   2    2.23    0.35 
  -3 -17   2    3.43    0.38 
  -3 -17   2    3.19    0.45 
  -3  17   2    2.84    0.44 
   3  17  -2    2.75    0.46 
  -2 -17   2    0.22    0.16 
   2 -17  -2   -0.01    0.14 
   2 -17  -2    0.35    0.17 
  -2 -17   2    0.49    0.15 
  -2 -17   2    0.34    0.16 
  -2 -17   2    0.53    0.20 
   2 -17  -2    0.43    0.19 
  -2  17   2    0.20    0.19 
   2  17  -2    0.46    0.21 
   1 -17  -2    6.05    0.60 
  -1 -17   2    4.84    0.45 
  -1 -17   2    5.13    0.38 
   1 -17  -2    4.94    0.54 
  -1 -17   2    4.78    0.52 
   1 -17  -2    5.58    0.56 
  -1 -17   2    5.60    0.44 
   1  17  -2    5.70    0.60 
  -1  17   2    5.50    0.63 
   0 -17   2   16.20    0.90 
   0 -17  -2   16.69    0.89 
   0 -17  -2   16.50    0.72 
   0 -17  -2   15.36    0.89 
   0 -17   2   15.18    0.76 
   0 -17   2   16.60    0.66 
   0 -17   2   15.23    0.69 
   0 -17  -2   15.10    0.84 
   0  17  -2   15.52    0.86 
   0  17   2   16.54    0.97 
   1 -17   2    0.05    0.05 
  -1 -17  -2    0.19    0.12 
  -1 -17  -2    0.03    0.14 
   1 -17   2    0.01    0.12 
   1 -17   2    0.21    0.12 
  -1 -17  -2    0.20    0.14 
   1 -17   2    0.08    0.08 
  -1 -17  -2    0.02    0.14 
   1  17   2    0.00    0.14 
  -1  17  -2   -0.05    0.11 
   2 -17   2    0.02    0.12 
  -2 -17  -2    0.33    0.22 
  -2 -17  -2    0.30    0.15 
   2 -17   2    0.16    0.08 
   2 -17   2    0.15    0.06 
  -2 -17  -2    0.12    0.16 
  -2 -17  -2    0.03    0.11 
   2 -17   2    0.19    0.12 
  -2  17  -2    0.26    0.17 
   2  17   2    0.31    0.20 
  -3 -17  -2   31.36    1.47 
  -3 -17  -2   27.61    1.26 
   3 -17   2   28.30    0.95 
  -3 -17  -2   26.86    1.40 
   3 -17   2   28.58    1.00 
   3 -17   2   28.60    1.39 
  -3 -17  -2   28.32    1.21 
   3 -17   2   30.34    1.03 
   3  17   2   26.95    1.31 
  -3  17  -2   28.77    1.25 
   3  17   2   28.16    1.47 
   4 -17   2    8.20    0.39 
  -4 -17  -2    8.48    0.89 
   4 -17   2    7.80    0.41 
  -4 -17  -2    8.20    0.62 
  -4 -17  -2    7.32    0.51 
   4 -17   2    8.19    0.40 
   4 -17   2    7.39    0.77 
  -4 -17  -2    9.15    0.95 
   4  17   2    7.91    0.65 
   4  17   2    7.73    0.89 
  -4  17  -2    8.19    0.57 
   5 -17   2    3.52    0.56 
  -5 -17  -2    3.02    0.54 
  -5 -17  -2    3.23    0.58 
  -5 -17  -2    3.23    0.49 
   5 -17   2    3.41    0.26 
   5 -17   2    2.92    0.29 
   5  17   2    3.97    0.57 
   5  17   2    3.07    0.59 
  -5  17  -2    3.63    0.46 
  -6 -17  -2    0.72    0.31 
   6 -17   2    0.42    0.13 
   6 -17   2    0.25    0.11 
  -6 -17  -2   -0.06    0.18 
  -6 -17  -2    0.39    0.26 
   6 -17   2    0.01    0.15 
   6  17   2    0.24    0.21 
   6  17   2    0.40    0.28 
   7 -17   2    0.84    0.19 
   7 -17   2    0.83    0.18 
  -7 -17  -2    0.72    0.34 
   7 -17   2    0.17    0.24 
  -7 -17  -2    0.76    0.34 
  -7 -17  -2    0.77    0.32 
   7  17   2    1.24    0.40 
   7  17   2    1.00    0.39 
   8 -17   2    0.55    0.18 
   8 -17   2    0.88    0.20 
  -8 -17  -2    0.61    0.32 
  -8 -17  -2    0.51    0.30 
   8  17   2    0.79    0.40 
   9 -17   2    0.07    0.15 
  -9 -17  -2   -0.02    0.22 
  -9 -17  -2   -0.24    0.24 
   9 -17   2   -0.02    0.12 
   9  17   2   -0.02    0.29 
   9 -18  -2    3.56    0.64 
  -9 -18   2    2.60    0.55 
  -9 -18   2    2.90    0.61 
   9 -18  -2    1.91    0.36 
  -9 -18   2    2.08    0.46 
   9 -18  -2    2.13    0.36 
   9  18  -2    1.95    0.52 
   8 -18  -2    1.41    0.31 
  -8 -18   2    1.64    0.45 
  -8 -18   2    0.96    0.36 
   8 -18  -2    1.57    0.30 
   8 -18  -2    1.79    0.47 
  -8 -18   2    1.33    0.35 
   8  18  -2    1.58    0.46 
   7 -18  -2   13.80    0.82 
  -7 -18   2   15.36    1.04 
   7 -18  -2   15.99    0.83 
  -7 -18   2   16.34    0.96 
   7 -18  -2   17.60    1.10 
  -7 -18   2   15.58    1.08 
   7  18  -2   17.81    1.20 
  -6 -18   2    2.39    0.44 
   6 -18  -2    2.18    0.35 
  -6 -18   2    1.63    0.39 
  -6 -18   2    2.11    0.37 
   6 -18  -2    2.42    0.45 
   6 -18  -2    1.99    0.32 
  -6  18   2    1.95    0.40 
   6  18  -2    2.20    0.49 
  -5 -18   2    5.81    0.71 
   5 -18  -2    3.60    0.42 
   5 -18  -2    3.59    0.45 
  -5 -18   2    4.79    0.60 
   5 -18  -2    4.11    0.59 
  -5 -18   2    4.04    0.49 
  -5  18   2    3.11    0.48 
   5  18  -2    4.38    0.65 
  -4 -18   2    0.07    0.13 
  -4 -18   2    0.33    0.18 
   4 -18  -2   -0.04    0.10 
  -4 -18   2    0.43    0.23 
   4 -18  -2    0.44    0.17 
   4 -18  -2    0.61    0.22 
  -4  18   2    0.16    0.17 
   4  18  -2    0.22    0.21 
  -3 -18   2    0.97    0.26 
   3 -18  -2    1.32    0.29 
  -3 -18   2    1.11    0.22 
  -3 -18   2    0.75    0.23 
   3 -18  -2    0.69    0.24 
  -3 -18   2    0.98    0.27 
   3 -18  -2    1.21    0.25 
  -3  18   2    0.97    0.29 
   3  18  -2    1.12    0.33 
   2 -18  -2    5.77    0.58 
   2 -18  -2    5.98    0.63 
  -2 -18   2    6.09    0.61 
  -2 -18   2    6.87    0.65 
  -2 -18   2    5.28    0.44 
   2 -18  -2    6.08    0.49 
  -2 -18   2    6.23    0.40 
  -2  18   2    7.58    0.76 
   2  18  -2    5.89    0.65 
   1 -18  -2    0.47    0.20 
   1 -18  -2    0.29    0.18 
  -1 -18   2    0.53    0.17 
   1 -18  -2    0.66    0.24 
  -1 -18   2    0.31    0.16 
  -1 -18   2    0.72    0.23 
  -1  18   2    0.45    0.22 
   1  18  -2    0.76    0.26 
   0 -18   2   15.88    0.65 
   0 -18  -2   15.10    0.87 
   0 -18   2   16.68    0.80 
   0 -18   2   16.54    0.72 
   0 -18  -2   16.00    0.92 
   0 -18  -2   15.26    0.88 
   0 -18   2   14.17    0.87 
   0  18  -2   13.90    0.85 
   0  18   2   17.33    1.01 
  -1 -18  -2   31.74    1.46 
  -1 -18  -2   29.14    1.42 
  -1 -18  -2   31.18    1.25 
   1 -18   2   30.82    1.20 
   1 -18   2   31.82    1.46 
   1 -18   2   30.97    1.02 
   1 -18   2   30.36    1.11 
  -1 -18  -2   31.78    1.36 
   1  18   2   31.07    1.52 
  -1  18  -2   32.27    1.39 
  -2 -18  -2    2.61    0.38 
   2 -18   2    2.70    0.21 
   2 -18   2    2.68    0.46 
   2 -18   2    2.75    0.16 
   2 -18   2    2.39    0.29 
  -2 -18  -2    2.26    0.42 
  -2 -18  -2    2.90    0.49 
  -2 -18  -2    1.84    0.32 
  -2  18  -2    1.88    0.36 
   2  18   2    2.99    0.51 
   3 -18   2    2.12    0.16 
  -3 -18  -2    1.91    0.33 
   3 -18   2    1.23    0.33 
   3 -18   2    2.55    0.27 
  -3 -18  -2    2.17    0.43 
  -3 -18  -2    2.77    0.48 
  -3 -18  -2    2.79    0.41 
   3  18   2    2.63    0.52 
  -3  18  -2    2.07    0.36 
   4 -18   2    0.16    0.09 
  -4 -18  -2   -0.02    0.16 
  -4 -18  -2    0.07    0.14 
  -4 -18  -2   -0.13    0.16 
   4 -18   2    0.12    0.17 
   4 -18   2   -0.05    0.08 
  -4 -18  -2    0.00    0.19 
   4 -18   2    0.06    0.09 
   4  18   2   -0.04    0.19 
  -4  18  -2    0.17    0.17 
   5 -18   2    0.17    0.22 
  -5 -18  -2    0.03    0.17 
   5 -18   2    0.00    0.09 
  -5 -18  -2   -0.23    0.17 
  -5 -18  -2   -0.10    0.18 
   5 -18   2    0.12    0.10 
  -5  18  -2    0.24    0.19 
   5  18   2    0.22    0.21 
   6 -18   2    6.99    0.83 
   6 -18   2    9.79    0.51 
   6 -18   2   10.92    0.53 
  -6 -18  -2    9.57    0.76 
  -6 -18  -2    8.51    0.93 
  -6 -18  -2   10.51    1.09 
   6  18   2    8.46    0.98 
  -7 -18  -2    0.22    0.28 
   7 -18   2   -0.06    0.09 
  -7 -18  -2    0.06    0.20 
  -7 -18  -2   -0.22    0.19 
   7 -18   2    0.04    0.22 
   7  18   2    0.39    0.33 
  -8 -18  -2    5.36    0.71 
  -8 -18  -2    4.32    0.76 
   8 -18   2    4.03    0.41 
   8  18   2    3.56    0.73 
   9 -18   2    0.22    0.14 
  -9 -18  -2    0.45    0.34 
  -9 -18  -2   -0.01    0.23 
   9  18   2    0.35    0.35 
  -9 -19   2    3.11    0.61 
   9 -19  -2    3.02    0.45 
   9 -19  -2    3.21    0.62 
  -9 -19   2    3.19    0.56 
   9 -19  -2    3.22    0.48 
  -9 -19   2    3.21    0.64 
   9  19  -2    3.35    0.68 
  -8 -19   2    0.79    0.34 
   8 -19  -2    0.65    0.34 
   8 -19  -2    0.50    0.21 
  -8 -19   2    0.86    0.29 
   8 -19  -2    0.97    0.26 
  -8 -19   2    0.74    0.37 
   8  19  -2    0.43    0.35 
  -7 -19   2    0.25    0.21 
   7 -19  -2   -0.04    0.15 
  -7 -19   2    0.13    0.23 
  -7 -19   2    0.14    0.17 
   7 -19  -2   -0.06    0.12 
   7 -19  -2    0.06    0.23 
   7  19  -2    0.18    0.22 
  -7  19   2    0.17    0.21 
  -6 -19   2    1.11    0.35 
  -6 -19   2    1.08    0.34 
   6 -19  -2    0.45    0.21 
   6 -19  -2    0.78    0.32 
  -6 -19   2    0.82    0.28 
   6 -19  -2    1.17    0.27 
   6  19  -2    0.94    0.36 
  -6  19   2    0.84    0.31 
  -5 -19   2    0.12    0.19 
  -5 -19   2    0.02    0.18 
  -5 -19   2    0.10    0.17 
   5 -19  -2    0.08    0.14 
   5 -19  -2    0.01    0.17 
   5 -19  -2   -0.05    0.12 
  -5  19   2    0.29    0.21 
   5  19  -2    0.19    0.23 
   4 -19  -2    3.06    0.38 
   4 -19  -2    3.11    0.42 
  -4 -19   2    3.04    0.40 
   4 -19  -2    2.57    0.44 
  -4 -19   2    3.12    0.50 
  -4 -19   2    2.43    0.41 
   4  19  -2    3.99    0.62 
  -4  19   2    2.40    0.46 
   3 -19  -2    3.00    0.47 
   3 -19  -2    2.15    0.38 
  -3 -19   2    2.80    0.44 
  -3 -19   2    2.41    0.39 
   3 -19  -2    2.64    0.38 
  -3 -19   2    3.08    0.43 
  -3 -19   2    2.25    0.32 
  -3  19   2    2.61    0.47 
   3  19  -2    2.84    0.49 
   2 -19  -2    7.86    0.74 
  -2 -19   2    7.35    0.52 
  -2 -19   2    6.90    0.68 
  -2 -19   2    7.44    0.45 
  -2 -19   2    6.98    0.57 
   2 -19  -2    6.96    0.56 
   2 -19  -2    6.28    0.52 
   2  19  -2    5.99    0.68 
  -2  19   2    8.18    0.82 
  -1 -19   2    2.27    0.36 
  -1 -19   2    1.30    0.31 
  -1 -19   2    1.64    0.27 
   1 -19  -2    1.51    0.34 
   1 -19  -2    1.88    0.36 
   1 -19  -2    2.10    0.37 
  -1  19   2    1.45    0.36 
   1  19  -2    1.38    0.33 
   0 -19   2   13.05    0.56 
   0 -19   2   13.45    0.71 
   0 -19  -2   11.10    0.75 
   0 -19  -2   11.69    0.76 
   0 -19   2   11.38    0.59 
   0 -19   2   12.52    0.81 
   0 -19  -2   11.91    0.79 
   0  19   2   11.53    0.86 
   0  19  -2   11.52    0.77 
  -1 -19  -2    2.57    0.34 
   1 -19   2    2.15    0.43 
  -1 -19  -2    2.91    0.47 
   1 -19   2    3.93    0.41 
   1 -19   2    2.43    0.18 
   1 -19   2    2.47    0.26 
  -1 -19  -2    3.51    0.46 
  -1 -19  -2    3.15    0.50 
   1  19   2    3.28    0.55 
  -1  19  -2    2.78    0.44 
   2 -19   2   12.20    0.45 
  -2 -19  -2   11.72    0.85 
  -2 -19  -2   12.47    0.75 
  -2 -19  -2   12.28    0.87 
   2 -19   2   10.94    0.81 
   2 -19   2   11.93    0.50 
  -2 -19  -2   12.13    0.70 
   2 -19   2   12.47    0.62 
  -2  19  -2   11.92    0.76 
   2  19   2   11.03    0.86 
   3 -19   2   16.48    0.74 
  -3 -19  -2   18.41    0.93 
  -3 -19  -2   17.05    1.08 
  -3 -19  -2   17.60    0.93 
   3 -19   2   18.33    0.65 
   3 -19   2   17.40    0.61 
  -3 -19  -2   15.82    1.05 
   3 -19   2   15.42    1.01 
  -3  19  -2   16.92    0.95 
   3  19   2   18.32    1.15 
  -4 -19  -2    2.54    0.50 
  -4 -19  -2    2.40    0.42 
   4 -19   2    2.52    0.51 
   4 -19   2    2.40    0.23 
  -4 -19  -2    2.52    0.53 
   4 -19   2    2.42    0.19 
   4  19   2    1.95    0.48 
  -4  19  -2    2.08    0.39 
  -5 -19  -2   11.18    1.12 
  -5 -19  -2   11.51    0.78 
   5 -19   2   10.32    0.99 
   5 -19   2    9.73    0.49 
  -5 -19  -2   10.13    1.04 
   5  19   2    8.73    1.02 
  -6 -19  -2    1.91    0.43 
  -6 -19  -2    2.10    0.52 
  -6 -19  -2    2.50    0.54 
   6 -19   2    1.97    0.26 
   6 -19   2    1.69    0.42 
   6  19   2    1.74    0.48 
   7 -19   2    3.69    0.61 
   7 -19   2    3.61    0.37 
  -7 -19  -2    2.97    0.53 
  -7 -19  -2    3.89    0.72 
  -7 -19  -2    3.40    0.65 
   7  19   2    3.55    0.67 
  -8 -19  -2   -0.13    0.24 
  -8 -19  -2    0.23    0.26 
   8 -19   2    0.01    0.12 
   8  19   2    0.20    0.30 
  -9 -19  -2    1.10    0.42 
  -9 -19  -2    0.71    0.42 
   9 -19   2    1.42    0.27 
   9 -20  -2    1.29    0.31 
   9 -20  -2    1.79    0.37 
   9 -20  -2    1.55    0.51 
  -9 -20   2    1.51    0.41 
  -9 -20   2    1.77    0.50 
   9  20  -2    1.39    0.52 
   8 -20  -2    0.56    0.35 
  -8 -20   2    0.20    0.25 
   8 -20  -2    0.51    0.22 
  -8 -20   2    0.68    0.36 
   8 -20  -2    0.13    0.17 
  -8 -20   2    0.57    0.32 
  -8  20   2    0.10    0.23 
   8  20  -2    0.34    0.33 
  -7 -20   2    8.92    1.00 
   7 -20  -2    8.65    0.65 
   7 -20  -2    9.73    0.64 
   7 -20  -2    8.33    0.93 
  -7 -20   2    8.62    0.84 
  -7 -20   2    8.72    0.91 
   7  20  -2    7.03    0.92 
  -7  20   2    8.69    0.89 
   6 -20  -2   -0.01    0.15 
  -6 -20   2    0.23    0.19 
   6 -20  -2    0.10    0.20 
  -6 -20   2    0.11    0.22 
  -6 -20   2    0.23    0.21 
   6 -20  -2   -0.19    0.14 
   6  20  -2   -0.18    0.19 
  -6  20   2   -0.09    0.21 
   5 -20  -2   21.51    1.09 
  -5 -20   2   22.20    1.27 
  -5 -20   2   24.42    1.13 
  -5 -20   2   24.66    1.25 
   5 -20  -2   21.12    1.26 
   5 -20  -2   22.89    1.06 
  -5  20   2   21.42    1.23 
   5  20  -2   22.51    1.34 
  -4 -20   2    6.10    0.65 
   4 -20  -2    6.68    0.76 
  -4 -20   2    6.81    0.51 
  -4 -20   2    7.20    0.78 
   4 -20  -2    6.78    0.52 
   4 -20  -2    6.92    0.56 
   4  20  -2    6.14    0.78 
  -4  20   2    6.57    0.76 
  -3 -20   2    0.60    0.23 
  -3 -20   2    1.12    0.30 
  -3 -20   2    0.45    0.18 
   3 -20  -2    0.39    0.19 
  -3 -20   2    0.29    0.18 
   3 -20  -2    0.69    0.23 
   3 -20  -2    0.50    0.25 
  -3  20   2    0.33    0.23 
   3  20  -2    0.85    0.30 
  -2 -20   2    0.04    0.12 
   2 -20  -2    0.12    0.17 
  -2 -20   2    0.12    0.16 
   2 -20  -2    0.12    0.18 
  -2 -20   2    0.06    0.16 
   2 -20  -2   -0.04    0.11 
   2  20  -2    0.20    0.20 
  -2  20   2    0.30    0.21 
  -1 -20   2    4.43    0.44 
   1 -20  -2    3.36    0.48 
  -1 -20   2    3.19    0.47 
  -1 -20   2    3.61    0.46 
   1 -20  -2    2.62    0.42 
   1 -20  -2    3.20    0.48 
  -1  20   2    3.82    0.59 
   1  20  -2    4.82    0.61 
   0 -20  -2   33.39    1.52 
   0 -20   2   32.08    1.23 
   0 -20  -2   33.82    1.49 
   0 -20   2   34.39    1.37 
   0 -20   2   31.41    1.50 
   0 -20  -2   32.99    1.50 
   0  20  -2   32.28    1.50 
   0  20   2   30.01    1.56 
   1 -20   2   14.24    0.54 
   1 -20   2   14.27    0.74 
   1 -20   2   14.04    0.92 
   1 -20   2   14.01    0.62 
  -1 -20  -2   13.55    0.91 
  -1 -20  -2   15.11    0.86 
  -1 -20  -2   15.27    0.95 
   1  20   2   12.96    0.95 
  -1  20  -2   14.33    0.88 
  -2 -20  -2   12.84    0.73 
  -2 -20  -2   12.76    0.90 
   2 -20   2   12.51    0.52 
  -2 -20  -2   12.60    0.78 
   2 -20   2   12.11    0.64 
   2 -20   2   12.86    0.89 
  -2 -20  -2   13.81    0.93 
   2 -20   2   12.57    0.47 
   2  20   2   13.26    0.96 
  -2  20  -2   13.16    0.82 
  -3 -20  -2    2.74    0.42 
   3 -20   2    3.04    0.53 
  -3 -20  -2    2.49    0.40 
  -3 -20  -2    2.70    0.50 
  -3 -20  -2    2.94    0.54 
   3  20   2    2.99    0.57 
  -3  20  -2    3.16    0.47 
  -4 -20  -2    8.28    0.92 
  -4 -20  -2    9.99    0.71 
   4 -20   2   10.05    0.98 
  -4 -20  -2    9.22    0.93 
  -4  20  -2   10.12    0.77 
   4  20   2    9.65    1.06 
  -5 -20  -2    0.07    0.18 
  -5 -20  -2   -0.10    0.19 
   5 -20   2   -0.16    0.19 
  -5 -20  -2   -0.19    0.18 
   5 -20   2    0.03    0.09 
   5  20   2   -0.07    0.21 
  -6 -20  -2    2.90    0.58 
  -6 -20  -2    2.84    0.50 
   6 -20   2    1.94    0.49 
  -6 -20  -2    1.99    0.52 
   6 -20   2    2.16    0.27 
   6  20   2    2.19    0.52 
  -7 -20  -2    4.23    0.69 
  -7 -20  -2    3.09    0.63 
   7 -20   2    3.93    0.39 
  -7 -20  -2    4.39    0.64 
   7 -20   2    3.68    0.64 
   7  20   2    4.19    0.77 
  -8 -20  -2    7.64    0.87 
   8 -20   2    6.20    0.45 
  -8 -20  -2    7.28    0.94 
  -8 -20  -2    5.50    0.85 
   8  20   2    6.74    0.97 
   8 -21  -2    1.98    0.38 
   8 -21  -2    1.57    0.36 
  -8 -21   2    1.59    0.47 
   8 -21  -2    1.46    0.45 
  -8 -21   2    1.49    0.43 
  -8 -21   2    1.19    0.33 
   8  21  -2    0.88    0.43 
  -8  21   2    1.42    0.42 
  -7 -21   2    2.63    0.53 
  -7 -21   2    1.83    0.41 
   7 -21  -2    1.64    0.35 
   7 -21  -2    1.65    0.33 
  -7 -21   2    2.17    0.53 
   7 -21  -2    1.91    0.45 
  -7  21   2    1.55    0.43 
   7  21  -2    2.40    0.60 
   6 -21  -2    8.17    0.59 
  -6 -21   2    7.71    0.75 
  -6 -21   2    8.85    0.97 
   6 -21  -2    7.54    0.72 
  -6 -21   2    6.47    0.75 
   6 -21  -2    6.80    0.84 
  -6  21   2    7.44    0.84 
   6  21  -2    6.54    0.86 
   5 -21  -2    0.34    0.26 
  -5 -21   2    0.38    0.26 
  -5 -21   2    0.19    0.21 
   5 -21  -2    0.27    0.18 
   5 -21  -2    0.01    0.15 
  -5 -21   2    0.26    0.20 
  -5  21   2    0.23    0.23 
   5  21  -2    0.36    0.28 
   4 -21  -2    4.22    0.62 
  -4 -21   2    4.41    0.62 
   4 -21  -2    5.55    0.60 
  -4 -21   2    4.58    0.49 
   4 -21  -2    4.86    0.54 
  -4 -21   2    4.57    0.56 
  -4  21   2    3.69    0.57 
   4  21  -2    4.56    0.67 
   3 -21  -2    0.04    0.15 
  -3 -21   2    0.14    0.13 
  -3 -21   2   -0.18    0.16 
   3 -21  -2    0.03    0.16 
  -3 -21   2    0.07    0.15 
  -3 -21   2    0.11    0.19 
   3 -21  -2    0.02    0.16 
   3  21  -2   -0.11    0.17 
  -3  21   2    0.01    0.19 
  -2 -21   2    6.27    0.68 
   2 -21  -2    5.25    0.64 
   2 -21  -2    6.73    0.67 
   2 -21  -2    5.14    0.61 
  -2 -21   2    5.42    0.55 
  -2 -21   2    7.65    0.75 
  -2  21   2    4.89    0.68 
   2  21  -2    5.93    0.73 
  -1 -21   2    0.64    0.25 
   1 -21  -2    0.81    0.27 
  -1 -21   2    1.36    0.25 
   1 -21  -2    1.37    0.34 
   1 -21  -2    0.74    0.26 
  -1 -21   2    1.01    0.29 
  -1  21   2    1.14    0.35 
   1  21  -2    1.32    0.35 
   0 -21  -2   10.49    0.75 
   0 -21   2    9.35    0.74 
   0 -21  -2   10.40    0.73 
   0 -21  -2    8.23    0.69 
   0 -21   2    9.59    0.53 
   0 -21   2    9.89    0.64 
   0  21  -2    8.35    0.70 
   0  21   2    8.65    0.91 
   1 -21   2    4.29    0.30 
  -1 -21  -2    3.84    0.52 
   1 -21   2    3.56    0.22 
  -1 -21  -2    3.57    0.53 
   1 -21   2    3.71    0.44 
  -1 -21  -2    3.17    0.53 
   1 -21   2    3.73    0.57 
  -1  21  -2    5.08    0.61 
   1  21   2    3.63    0.60 
  -2 -21  -2    0.24    0.20 
  -2 -21  -2    0.57    0.26 
   2 -21   2    0.85    0.29 
  -2 -21  -2    0.53    0.21 
   2 -21   2    0.74    0.10 
  -2 -21  -2    0.36    0.24 
   2 -21   2    0.46    0.11 
  -2  21  -2    0.76    0.28 
   2  21   2    0.92    0.37 
  -3 -21  -2   -0.09    0.18 
   3 -21   2   -0.13    0.18 
  -3 -21  -2    0.15    0.18 
  -3 -21  -2   -0.07    0.18 
  -3 -21  -2   -0.09    0.14 
   3  21   2    0.08    0.25 
  -3  21  -2    0.20    0.20 
  -4 -21  -2    0.67    0.30 
  -4 -21  -2    0.58    0.31 
  -4 -21  -2    0.81    0.25 
   4 -21   2    0.32    0.24 
   4  21   2    0.60    0.34 
  -5 -21  -2    4.01    0.70 
   5 -21   2    1.83    0.45 
  -5 -21  -2    2.94    0.58 
  -5 -21  -2    3.33    0.54 
   5  21   2    1.91    0.50 
  -6 -21  -2    0.16    0.20 
  -6 -21  -2    0.34    0.30 
  -6 -21  -2    0.50    0.33 
   6 -21   2    0.41    0.29 
   6 -21   2    0.60    0.15 
   6  21   2    0.45    0.35 
  -7 -21  -2    0.28    0.29 
   7 -21   2    0.31    0.31 
  -7 -21  -2    0.70    0.34 
   7 -21   2    0.30    0.15 
  -7 -21  -2   -0.01    0.24 
   7  21   2    0.14    0.29 
  -8 -21  -2    0.22    0.33 
   8 -21   2    1.00    0.23 
  -8 -21  -2    0.64    0.39 
  -8 -21  -2    1.79    0.46 
   8  21   2    0.21    0.33 
  -8 -22   2   -0.15    0.24 
  -8 -22   2    0.14    0.23 
   8 -22  -2   -0.06    0.17 
   8 -22  -2    0.01    0.30 
   8 -22  -2    0.00    0.18 
  -8 -22   2    0.27    0.29 
  -8  22   2    0.31    0.31 
   8  22  -2   -0.22    0.27 
  -7 -22   2    0.09    0.21 
  -7 -22   2   -0.06    0.21 
   7 -22  -2    0.17    0.28 
   7 -22  -2    0.12    0.20 
   7 -22  -2    0.16    0.19 
  -7 -22   2    0.35    0.32 
  -7  22   2    0.35    0.28 
   7  22  -2    0.03    0.28 
  -6 -22   2    0.23    0.22 
   6 -22  -2   -0.10    0.16 
  -6 -22   2    0.16    0.21 
   6 -22  -2    0.10    0.18 
   6 -22  -2   -0.18    0.14 
  -6 -22   2    0.20    0.25 
   6  22  -2    0.18    0.29 
  -6  22   2    0.18    0.25 
   5 -22  -2    0.32    0.20 
  -5 -22   2    0.35    0.22 
  -5 -22   2    0.63    0.24 
   5 -22  -2    0.35    0.27 
   5 -22  -2    0.51    0.24 
  -5 -22   2    0.41    0.25 
   5  22  -2    0.55    0.33 
  -5  22   2    0.52    0.31 
   4 -22  -2    0.33    0.27 
  -4 -22   2    0.00    0.15 
   4 -22  -2    0.68    0.25 
  -4 -22   2    0.43    0.20 
   4 -22  -2    0.23    0.18 
  -4 -22   2    0.79    0.32 
  -4  22   2    0.57    0.30 
   4  22  -2    0.27    0.26 
   3 -22  -2    2.84    0.51 
   3 -22  -2    3.54    0.50 
  -3 -22   2    3.99    0.56 
  -3 -22   2    2.78    0.42 
  -3 -22   2    3.08    0.48 
   3 -22  -2    2.73    0.44 
   3  22  -2    3.25    0.57 
  -3  22   2    2.86    0.54 
  -2 -22   2    0.17    0.21 
  -2 -22   2    0.16    0.19 
   2 -22  -2   -0.07    0.16 
  -2 -22   2    0.18    0.14 
   2 -22  -2    0.03    0.19 
   2 -22  -2    0.03    0.17 
   2  22  -2    0.13    0.20 
  -2  22   2   -0.14    0.19 
   1 -22  -2    0.81    0.28 
   1 -22  -2    1.05    0.30 
  -1 -22   2    1.01    0.28 
  -1 -22   2    0.68    0.29 
  -1 -22   2    0.51    0.18 
   1 -22  -2    0.60    0.26 
  -1  22   2    1.99    0.47 
   1  22  -2    0.94    0.32 
   0 -22  -2    2.91    0.47 
   0 -22   2    1.83    0.42 
   0 -22  -2    3.30    0.54 
   0 -22   2    3.04    0.44 
   0 -22  -2    3.35    0.53 
   0 -22   2    3.48    0.36 
   0  22  -2    2.59    0.48 
   0  22   2    2.21    0.47 
  -1 -22  -2   -0.02    0.16 
   1 -22   2   -0.01    0.15 
  -1 -22  -2   -0.03    0.16 
  -1 -22  -2   -0.06    0.16 
   1 -22   2   -0.04    0.08 
  -1  22  -2    0.05    0.21 
   1  22   2   -0.10    0.20 
  -2 -22  -2    1.25    0.36 
   2 -22   2    1.90    0.18 
  -2 -22  -2    1.53    0.34 
   2 -22   2    1.47    0.42 
  -2 -22  -2    1.66    0.40 
   2  22   2    1.34    0.42 
  -2  22  -2    1.62    0.38 
  -3 -22  -2    0.65    0.25 
  -3 -22  -2    0.46    0.26 
   3 -22   2    0.63    0.31 
  -3 -22  -2    0.49    0.23 
  -3 -22  -2    0.59    0.30 
   3  22   2    0.29    0.27 
  -4 -22  -2    2.49    0.43 
   4 -22   2    1.82    0.45 
  -4 -22  -2    2.21    0.50 
  -4 -22  -2    2.48    0.53 
   4  22   2    1.74    0.46 
  -5 -22  -2   -0.13    0.18 
  -5 -22  -2    0.10    0.25 
   5 -22   2   -0.06    0.22 
  -5 -22  -2    0.03    0.21 
   5  22   2   -0.02    0.23 
  -6 -22  -2    8.67    1.07 
  -6 -22  -2    8.52    0.87 
   6 -22   2    7.41    0.92 
  -6 -22  -2    8.54    1.00 
   6  22   2    7.04    1.00 
  -7 -22  -2   -0.21    0.20 
  -7 -22  -2   -0.01    0.29 
   7 -22   2    0.36    0.31 
   7 -22   2    0.18    0.13 
  -7 -22  -2    0.17    0.24 
   7  22   2   -0.17    0.24 
   7 -23  -2   -0.15    0.16 
  -7 -23   2   -0.05    0.23 
   7 -23  -2   -0.06    0.25 
  -7 -23   2   -0.14    0.23 
   7 -23  -2   -0.11    0.17 
  -7 -23   2    0.04    0.19 
   7  23  -2    0.37    0.33 
  -7  23   2   -0.03    0.26 
  -6 -23   2    1.08    0.30 
   6 -23  -2    0.63    0.26 
   6 -23  -2    1.33    0.42 
   6 -23  -2    1.22    0.32 
  -6 -23   2    0.82    0.36 
  -6 -23   2    0.68    0.29 
   6  23  -2    1.26    0.43 
  -6  23   2    1.11    0.39 
   5 -23  -2   -0.02    0.17 
  -5 -23   2   -0.06    0.16 
   5 -23  -2   -0.06    0.16 
  -5 -23   2    0.22    0.20 
  -5 -23   2    0.17    0.23 
   5 -23  -2   -0.18    0.18 
  -5  23   2    0.14    0.22 
   5  23  -2    0.48    0.31 
   4 -23  -2   17.79    1.16 
  -4 -23   2   15.42    0.96 
  -4 -23   2   18.29    1.11 
   4 -23  -2   16.80    0.96 
   4 -23  -2   15.32    0.94 
   4  23  -2   15.64    1.12 
  -4  23   2   15.58    1.09 
  -3 -23   2    0.41    0.25 
   3 -23  -2    0.90    0.33 
   3 -23  -2    0.48    0.26 
  -3 -23   2    0.52    0.22 
   3 -23  -2    0.73    0.29 
   3  23  -2    0.64    0.32 
  -3  23   2    1.03    0.37 
   2 -23  -2    1.86    0.40 
  -2 -23   2    1.87    0.42 
   2 -23  -2    1.64    0.37 
  -2 -23   2    2.05    0.42 
  -2 -23   2    1.17    0.27 
   2 -23  -2    2.20    0.45 
   2  23  -2    2.38    0.50 
  -2  23   2    1.56    0.41 
  -1 -23   2    2.03    0.38 
  -1 -23   2    1.89    0.42 
   1 -23  -2    1.24    0.33 
   1 -23  -2    1.18    0.33 
  -1 -23   2    1.35    0.26 
   1 -23  -2    1.03    0.34 
   1  23  -2    1.43    0.40 
  -1  23   2    0.95    0.36 
   0 -23  -2    0.39    0.26 
   0 -23  -2    1.11    0.34 
   0 -23   2    0.51    0.25 
   0 -23  -2    0.54    0.25 
   0 -23   2    1.10    0.28 
   0 -23   2    1.25    0.22 
   0  23  -2    0.84    0.30 
   0  23   2    1.10    0.39 
  -1 -23  -2    0.06    0.19 
  -1 -23  -2    0.02    0.21 
   1 -23   2    0.10    0.10 
   1 -23   2    0.11    0.23 
  -1 -23  -2   -0.01    0.15 
  -1  23  -2    0.26    0.23 
   1  23   2    0.10    0.22 
  -2 -23  -2    0.48    0.27 
   2 -23   2    0.22    0.25 
  -2 -23  -2   -0.19    0.17 
  -2 -23  -2    0.27    0.21 
   2  23   2    0.36    0.25 
   3 -23   2    0.46    0.26 
  -3 -23  -2    0.16    0.24 
  -3 -23  -2    0.28    0.22 
  -3 -23  -2    0.45    0.30 
   3  23   2    0.11    0.23 
  -4 -23  -2   -0.04    0.21 
   4 -23   2    0.14    0.22 
  -4 -23  -2    0.15    0.21 
  -4 -23  -2   -0.01    0.21 
   4  23   2    0.00    0.23 
  -5 -23  -2   -0.03    0.21 
   5 -23   2    0.15    0.29 
  -5 -23  -2   -0.17    0.18 
  -5 -23  -2   -0.03    0.28 
   5  23   2   -0.03    0.24 
   6 -23   2    2.33    0.56 
  -6 -23  -2    1.48    0.48 
  -6 -23  -2    1.20    0.38 
  -6 -23  -2    2.46    0.54 
   6  23   2    1.92    0.59 
  -7 -23  -2   -0.07    0.27 
   7 -23   2   -0.01    0.27 
  -7 -23  -2    0.11    0.26 
  -7 -23  -2   -0.20    0.22 
   7  23   2    0.23    0.33 
  -7 -24   2    1.01    0.42 
  -7 -24   2    1.90    0.43 
   7 -24  -2    1.33    0.46 
  -7 -24   2    1.83    0.44 
   7 -24  -2    1.85    0.40 
   7  24  -2    1.70    0.53 
  -7  24   2    2.32    0.55 
  -6 -24   2    1.61    0.38 
   6 -24  -2    1.76    0.38 
  -6 -24   2    1.62    0.42 
   6 -24  -2    1.36    0.36 
  -6 -24   2    2.17    0.54 
   6 -24  -2    1.14    0.42 
   6  24  -2    0.92    0.41 
  -6  24   2    2.55    0.57 
   5 -24  -2    5.79    0.64 
  -5 -24   2    4.97    0.71 
   5 -24  -2    5.53    0.64 
  -5 -24   2    4.81    0.64 
   5 -24  -2    6.06    0.82 
   5  24  -2    5.95    0.84 
  -5  24   2    6.96    0.86 
  -4 -24   2    0.04    0.16 
   4 -24  -2    0.94    0.35 
  -4 -24   2    1.27    0.40 
   4 -24  -2    0.70    0.27 
   4 -24  -2    0.86    0.29 
  -4  24   2    0.42    0.27 
   4  24  -2    0.34    0.29 
  -3 -24   2    2.38    0.41 
   3 -24  -2    2.16    0.43 
   3 -24  -2    2.96    0.56 
   3 -24  -2    2.09    0.41 
  -3 -24   2    2.93    0.52 
   3  24  -2    2.06    0.49 
  -3  24   2    2.82    0.55 
   2 -24  -2    2.12    0.42 
  -2 -24   2    2.50    0.46 
   2 -24  -2    3.38    0.58 
  -2 -24   2    2.59    0.39 
  -2 -24   2    1.59    0.37 
   2 -24  -2    2.35    0.44 
  -2  24   2    2.45    0.56 
   2  24  -2    2.29    0.50 
  -1 -24   2    0.36    0.25 
   1 -24  -2    0.33    0.22 
  -1 -24   2    0.09    0.19 
  -1 -24   2    0.12    0.14 
   1 -24  -2    0.23    0.24 
   1 -24  -2    0.42    0.27 
  -1  24   2    0.36    0.30 
   1  24  -2   -0.17    0.19 
   0 -24  -2    7.58    0.83 
   0 -24  -2    7.31    0.79 
   0 -24   2    7.71    0.47 
   0 -24  -2    7.86    0.86 
   0 -24   2    7.39    0.84 
   0  24   2    8.06    0.92 
   0  24  -2    7.61    0.90 
  -1 -24  -2    0.80    0.33 
  -1 -24  -2    1.06    0.34 
   1 -24   2    1.15    0.18 
  -1 -24  -2    0.85    0.33 
   1 -24   2    0.72    0.30 
   1  24   2    1.15    0.42 
   2 -24   2   24.48    1.39 
  -2 -24  -2   22.90    1.36 
  -2 -24  -2   23.25    1.25 
  -2 -24  -2   20.85    1.27 
   2  24   2   21.84    1.41 
   3 -24   2   -0.02    0.20 
  -3 -24  -2   -0.02    0.19 
  -3 -24  -2    0.16    0.23 
   3  24   2   -0.17    0.23 
  -4 -24  -2    4.45    0.70 
   4 -24   2    3.86    0.67 
  -4 -24  -2    4.85    0.78 
   4  24   2    4.52    0.80 
  -5 -24  -2    0.11    0.21 
  -5 -24  -2    0.21    0.30 
   5 -24   2    0.21    0.28 
  -5 -24  -2    0.37    0.32 
   5  24   2   -0.18    0.28 
   6 -24   2   -0.28    0.19 
  -6 -24  -2    0.07    0.29 
  -6 -24  -2    0.26    0.24 
  -6 -24  -2    0.31    0.29 
   6  24   2    0.07    0.30 
  -6 -25   2    7.33    0.91 
  -6 -25   2    5.70    0.72 
   6 -25  -2    6.55    0.87 
   6 -25  -2    8.36    0.79 
  -6  25   2    6.63    0.87 
   6  25  -2    7.18    0.96 
  -5 -25   2    2.18    0.44 
   5 -25  -2    3.06    0.59 
   5 -25  -2    2.40    0.43 
  -5 -25   2    2.86    0.59 
   5  25  -2    2.74    0.62 
  -5  25   2    1.75    0.48 
  -4 -25   2    0.43    0.28 
  -4 -25   2    0.16    0.18 
   4 -25  -2    0.50    0.31 
   4 -25  -2    0.32    0.24 
   4 -25  -2    0.23    0.25 
   4  25  -2   -0.36    0.23 
  -4  25   2    0.65    0.35 
   3 -25  -2    6.32    0.81 
  -3 -25   2    7.29    0.61 
   3 -25  -2    8.28    0.82 
   3 -25  -2    9.53    0.89 
  -3 -25   2    9.39    0.93 
  -3  25   2    8.64    0.98 
   3  25  -2    9.16    1.00 
   2 -25  -2    0.22    0.23 
   2 -25  -2    0.74    0.29 
  -2 -25   2    0.63    0.27 
  -2 -25   2    0.70    0.23 
   2 -25  -2    0.28    0.26 
  -2 -25   2    1.02    0.37 
  -2  25   2    0.89    0.33 
   2  25  -2    0.19    0.26 
   1 -25  -2    0.00    0.21 
  -1 -25   2   -0.09    0.20 
   1 -25  -2    0.06    0.19 
   1 -25  -2    0.22    0.22 
  -1 -25   2    0.01    0.12 
  -1 -25   2   -0.10    0.16 
  -1  25   2   -0.17    0.22 
   0 -25  -2    1.35    0.39 
   0 -25   2    1.03    0.20 
   0 -25   2    1.08    0.35 
   0 -25  -2    0.99    0.33 
   0 -25  -2    0.91    0.34 
   0  25   2    1.12    0.41 
  -1 -25  -2    4.28    0.63 
  -1 -25  -2    6.15    0.76 
   1 -25   2    5.09    0.74 
  -1 -25  -2    5.58    0.77 
   1 -25   2    4.72    0.29 
   1  25   2    5.24    0.80 
  -2 -25  -2    1.63    0.42 
  -2 -25  -2    2.65    0.56 
   2 -25   2    1.32    0.41 
  -2 -25  -2    1.81    0.40 
   2  25   2    1.20    0.42 
  -3 -25  -2    0.34    0.26 
  -3 -25  -2    0.81    0.36 
   3 -25   2   -0.03    0.27 
   3  25   2    0.67    0.37 
   4 -25   2    0.61    0.33 
  -4 -25  -2    0.94    0.36 
  -4 -25  -2    1.12    0.40 
   4  25   2    0.48    0.33 
  -5 -25  -2    1.67    0.50 
   5 -25   2    1.40    0.47 
  -5 -25  -2    1.22    0.47 
   5  25   2    0.40    0.36 
  -6 -25  -2    0.84    0.38 
   6 -25   2    1.14    0.46 
  -6 -25  -2    0.84    0.35 
  -6 -25  -2    0.94    0.45 
   6  25   2    0.76    0.40 
   5 -26  -2    3.61    0.53 
  -5 -26   2    4.61    0.71 
   5 -26  -2    3.65    0.67 
  -5 -26   2    3.67    0.55 
   5  26  -2    4.41    0.75 
  -5  26   2    4.32    0.75 
   4 -26  -2    0.96    0.31 
   4 -26  -2    1.14    0.38 
  -4 -26   2    1.07    0.37 
  -4 -26   2    0.75    0.27 
  -4  26   2    1.27    0.43 
   4  26  -2    1.70    0.50 
  -3 -26   2   12.27    0.79 
   3 -26  -2   12.08    0.88 
   3 -26  -2   11.57    1.15 
  -3 -26   2   11.95    0.91 
   3 -26  -2   11.34    0.82 
  -3  26   2   12.84    1.03 
   3  26  -2   11.60    1.18 
   2 -26  -2    1.47    0.38 
   2 -26  -2    1.32    0.41 
   2 -26  -2    0.97    0.35 
  -2 -26   2    1.36    0.29 
  -2 -26   2    0.95    0.33 
  -2 -26   2    1.06    0.39 
  -2  26   2    0.99    0.43 
   1 -26  -2    0.14    0.19 
  -1 -26   2    0.20    0.15 
   1 -26  -2    0.19    0.27 
  -1 -26   2    0.06    0.22 
   1 -26  -2   -0.03    0.22 
  -1  26   2    0.51    0.35 
   0 -26  -2    0.77    0.32 
   0 -26   2    0.62    0.16 
   0 -26   2    0.39    0.27 
   0 -26  -2    0.65    0.28 
   0 -26  -2    0.27    0.28 
   0  26   2    0.20    0.28 
  -1 -26  -2   -0.27    0.17 
   1 -26   2   -0.02    0.20 
  -1 -26  -2   -0.09    0.21 
  -1 -26  -2    0.22    0.22 
   1 -26   2    0.03    0.07 
   1  26   2    0.08    0.27 
  -2 -26  -2    0.34    0.25 
  -2 -26  -2    0.29    0.26 
  -2 -26  -2    0.11    0.23 
   2 -26   2    0.43    0.31 
   2  26   2    0.56    0.34 
   3 -26   2    0.29    0.28 
  -3 -26  -2   -0.05    0.21 
  -3 -26  -2    0.34    0.29 
   3  26   2    0.25    0.29 
  -4 -26  -2   -0.05    0.29 
   4 -26   2    0.09    0.28 
  -4 -26  -2    0.40    0.32 
   4  26   2    0.66    0.38 
  -5 -26  -2    0.31    0.33 
  -5 -26  -2    0.75    0.36 
   5 -26   2    0.42    0.33 
   5  26   2    0.65    0.36 
   5 -27  -2   -0.06    0.20 
  -5 -27   2    0.04    0.26 
  -5 -27   2    0.05    0.18 
  -5  27   2    0.08    0.31 
   5  27  -2   -0.36    0.25 
  -4 -27   2    1.25    0.43 
  -4 -27   2    1.28    0.33 
   4 -27  -2    1.43    0.38 
   4 -27  -2    1.79    0.49 
  -4  27   2    1.08    0.43 
   3 -27  -2    7.65    0.78 
  -3 -27   2    7.94    0.62 
   3 -27  -2    8.37    1.00 
  -3 -27   2    6.84    0.82 
  -3  27   2    7.39    0.97 
  -2 -27   2    4.34    0.63 
  -2 -27   2    2.60    0.38 
   2 -27  -2    3.09    0.51 
   2 -27  -2    2.10    0.48 
   2 -27  -2    3.27    0.60 
  -2 -27   2    2.98    0.65 
  -2  27   2    3.59    0.71 
  -1 -27   2    6.01    0.46 
   1 -27  -2    6.08    0.82 
   1 -27  -2    5.34    0.68 
  -1 -27   2    6.61    0.84 
   1 -27  -2    4.89    0.72 
  -1  27   2    6.75    0.94 
   0 -27   2    2.29    0.52 
   0 -27  -2    2.33    0.49 
   0 -27  -2    3.43    0.63 
   0 -27  -2    2.76    0.55 
   0 -27   2    3.03    0.31 
   0  27   2    3.37    0.69 
   1 -27   2    7.81    0.95 
  -1 -27  -2    6.97    0.84 
  -1 -27  -2    5.93    0.81 
  -1 -27  -2    7.02    0.81 
   1  27   2    5.17    0.81 
  -2 -27  -2   -0.09    0.21 
  -2 -27  -2    0.07    0.24 
  -2 -27  -2    0.06    0.25 
   2 -27   2    0.41    0.34 
   2  27   2    0.11    0.30 
   3 -27   2    2.25    0.59 
  -3 -27  -2    2.47    0.55 
  -3 -27  -2    1.45    0.47 
   3  27   2    2.26    0.57 
  -4 -27  -2   -0.25    0.24 
   4 -27   2    0.06    0.30 
  -4 -27  -2   -0.11    0.21 
   4  27   2    0.04    0.35 
  -4 -28   2    0.18    0.19 
  -4 -28   2    0.24    0.33 
   4 -28  -2   -0.03    0.20 
  -4  28   2    0.56    0.37 
   3 -28  -2    0.07    0.25 
   3 -28  -2    0.55    0.25 
  -3 -28   2    0.15    0.17 
  -3 -28   2    0.07    0.26 
  -3  28   2    0.50    0.38 
  -2 -28   2    0.81    0.23 
   2 -28  -2    0.58    0.28 
   2 -28  -2    0.67    0.37 
  -2  28   2    0.67    0.41 
   1 -28  -2    1.57    0.44 
   1 -28  -2    1.45    0.38 
  -1 -28   2    1.25    0.44 
   1 -28  -2    1.00    0.41 
  -1 -28   2    1.41    0.26 
  -1  28   2    0.73    0.44 
   0 -28   2    3.40    0.28 
   0 -28  -2    2.45    0.54 
   0 -28  -2    3.80    0.59 
   0 -28  -2    4.35    0.70 
   0 -28   2    3.64    0.67 
   0  28   2    2.98    0.65 
  -1 -28  -2    0.31    0.30 
   1 -28   2    0.30    0.33 
  -1 -28  -2   -0.12    0.20 
  -1 -28  -2    0.18    0.30 
   1  28   2    0.11    0.32 
  -2 -28  -2    3.03    0.59 
  -2 -28  -2    2.73    0.60 
   2 -28   2    1.99    0.50 
  -2 -28  -2    2.99    0.58 
   2  28   2    3.35    0.73 
   3 -28   2   -0.19    0.25 
  -3 -28  -2    0.01    0.24 
  -3 -28  -2    0.20    0.32 
   3  28   2    0.65    0.40 
  -2 -29   2    1.42    0.29 
   2 -29  -2    1.31    0.35 
   2 -29  -2    1.10    0.43 
  -2  29   2    1.31    0.49 
   1 -29  -2    1.82    0.42 
   1 -29  -2    1.10    0.49 
   1 -29  -2    1.48    0.46 
  -1 -29   2    1.52    0.26 
  -1 -29   2    1.33    0.47 
  -1  29   2    1.76    0.56 
   0 -29   2    4.41    0.29 
   0 -29  -2    4.02    0.69 
   0 -29  -2    4.15    0.69 
   0 -29   2    3.82    0.71 
   0 -29  -2    4.86    0.67 
   0  29   2    3.62    0.73 
  -1 -29  -2    3.77    0.69 
   1 -29   2    5.33    0.82 
  -1 -29  -2    3.78    0.66 
  -1 -29  -2    3.24    0.56 
   1  29   2    2.86    0.65 
  -2 -29  -2    1.44    0.52 
  -2 -29  -2    1.54    0.43 
   2 -29   2    0.66    0.39 
   2  29   2    1.47    0.56 
  12   0  -3    0.05    0.19 
  11   0  -3    0.82    0.28 
  10   0  -3    0.15    0.17 
 -10   0   3    0.00    0.18 
  -9   0   3   16.10    0.96 
   9   0  -3   15.40    0.86 
   9   0  -3   16.09    0.92 
   9   0  -3   16.55    1.02 
   8   0  -3   -0.02    0.13 
  -8   0   3    0.01    0.13 
   8   0  -3   -0.07    0.13 
   8   0  -3    0.04    0.11 
   7   0  -3   15.16    0.87 
  -7   0   3   15.50    0.85 
   7   0  -3   15.32    0.80 
   7   0  -3   16.13    0.79 
   6   0  -3   -0.13    0.06 
   6   0  -3   -0.02    0.05 
  -6   0   3    0.04    0.10 
   6   0  -3    0.03    0.10 
  -6   0   3   -0.07    0.09 
   6   0  -3   -0.03    0.09 
   5   0  -3   12.00    0.67 
  -5   0   3   12.10    0.64 
   5   0  -3   12.24    0.48 
   5   0  -3   13.10    0.60 
  -5   0   3   13.53    0.64 
   5   0  -3   12.43    0.62 
   4   0  -3    0.25    0.11 
   4   0  -3   -0.03    0.05 
   4   0  -3    0.01    0.04 
  -4   0   3    0.18    0.11 
  -4   0   3    0.06    0.08 
   4   0  -3    0.06    0.06 
   3   0  -3   92.98    2.79 
   3   0  -3   84.76    2.82 
  -3   0   3   90.10    2.81 
   3   0  -3   88.14    2.75 
  -3   0   3   89.96    2.79 
   2   0  -3    0.06    0.04 
  -2   0   3   -0.01    0.04 
   2   0  -3    0.03    0.04 
  -2   0   3   -0.02    0.03 
   1   0  -3    7.14    0.31 
   1   0  -3    7.35    0.32 
  -1   0   3    7.97    0.33 
  -1   0   3    7.78    0.32 
   0   0   3   -0.14    0.03 
   0   0   3   -0.13    0.04 
   0   0  -3   -0.13    0.04 
   0   0  -3   -0.12    0.04 
   0   0   3   -0.12    0.03 
   1   0   3   95.52    2.95 
  -1   0  -3   96.09    2.94 
   1   0   3   96.64    2.89 
   1   0   3   96.32    2.93 
  -1   0  -3   92.55    2.94 
   1   0   3   95.33    2.94 
   2   0   3   -0.01    0.05 
  -2   0  -3   -0.03    0.06 
   2   0   3    0.01    0.06 
  -2   0  -3    0.00    0.05 
   2   0   3   -0.02    0.06 
   2   0   3   -0.01    0.06 
  -3   0  -3  156.08    4.87 
   3   0   3  159.98    4.92 
   3   0   3  158.63    4.86 
   3   0   3  163.55    4.93 
  -3   0  -3  156.42    4.90 
   4   0   3    0.04    0.09 
   4   0   3    0.03    0.08 
  -4   0  -3    0.05    0.08 
  -4   0  -3    0.11    0.10 
   4   0   3    0.08    0.10 
  -5   0  -3    2.29    0.32 
   5   0   3    1.15    0.24 
  -5   0  -3    2.80    0.37 
   5   0   3    1.93    0.31 
   5   0   3    2.50    0.36 
   6   0   3    0.08    0.12 
  -6   0  -3   -0.02    0.11 
   6   0   3    0.17    0.12 
  -6   0  -3    0.00    0.10 
   6   0   3   -0.13    0.09 
  -7   0  -3   41.97    1.73 
   7   0   3   43.70    1.78 
  -7   0  -3   44.47    1.73 
   7   0   3   44.44    1.79 
   7   0   3   42.52    1.78 
   8   0   3    0.00    0.17 
  -8   0  -3    0.01    0.14 
  -8   0  -3   -0.18    0.14 
   8   0   3   -0.07    0.15 
   8   0   3    0.02    0.16 
   9   0   3    7.48    0.78 
   9   0   3    7.45    0.77 
  -9   0  -3    6.74    0.71 
   9   0   3    5.38    0.64 
 -10   0  -3    0.13    0.19 
  10   0   3   -0.01    0.19 
  10   0   3   -0.05    0.19 
  10   0   3    0.24    0.22 
 -11   0  -3    2.48    0.47 
  11   0   3    1.87    0.45 
  11   0   3    1.36    0.38 
  11   0   3    2.20    0.46 
  12  -1  -3    0.88    0.29 
  12   1  -3    0.45    0.24 
  11  -1  -3   -0.08    0.14 
 -11  -1   3    0.14    0.22 
  11   1  -3    0.03    0.16 
 -10  -1   3    0.07    0.18 
  10  -1  -3    0.34    0.22 
  10  -1  -3    0.16    0.15 
  10   1  -3    0.40    0.28 
  10   1  -3   -0.05    0.13 
 -10   1   3    0.27    0.22 
   9  -1  -3    7.81    0.73 
   9  -1  -3    6.88    0.55 
  -9  -1   3    7.35    0.76 
   9   1  -3    6.84    0.78 
  -9   1   3    7.52    0.75 
   9   1  -3    7.06    0.56 
   9   1  -3    7.49    0.60 
   8  -1  -3    1.27    0.32 
  -8  -1   3    1.07    0.28 
   8  -1  -3    1.37    0.30 
   8  -1  -3    1.32    0.27 
  -8   1   3    1.64    0.32 
   8   1  -3    0.63    0.25 
   8   1  -3    1.24    0.28 
   8   1  -3    0.83    0.24 
  -7  -1   3   35.48    1.51 
   7  -1  -3   35.59    1.46 
   7  -1  -3   35.67    1.42 
   7  -1  -3   37.59    1.58 
  -7  -1   3   37.50    1.50 
   7   1  -3   36.50    1.58 
   7   1  -3   36.43    1.48 
   7   1  -3   39.53    1.46 
  -7   1   3   36.85    1.51 
   6  -1  -3    0.78    0.17 
   6  -1  -3    0.94    0.24 
   6  -1  -3    0.67    0.12 
  -6  -1   3    0.83    0.19 
   6  -1  -3    0.85    0.20 
  -6  -1   3    0.55    0.17 
   6   1  -3    0.64    0.18 
   6   1  -3    0.77    0.10 
  -6   1   3    0.92    0.21 
   6   1  -3    0.83    0.19 
  -6   1   3    0.94    0.22 
   6   1  -3    1.56    0.31 
  -5  -1   3    2.88    0.33 
   5  -1  -3    2.11    0.26 
  -5  -1   3    2.26    0.30 
   5  -1  -3    2.19    0.17 
   5  -1  -3    2.12    0.27 
   5  -1  -3    2.23    0.31 
   5   1  -3    2.17    0.14 
  -5   1   3    2.74    0.33 
   5   1  -3    2.77    0.31 
  -5   1   3    1.83    0.26 
   5   1  -3    2.05    0.25 
   5   1  -3    2.63    0.36 
  -4  -1   3    4.17    0.30 
   4  -1  -3    4.68    0.25 
   4  -1  -3    5.03    0.30 
  -4  -1   3    4.48    0.33 
   4  -1  -3    5.01    0.32 
   4  -1  -3    4.08    0.33 
   4   1  -3    4.69    0.22 
  -4   1   3    4.78    0.33 
   4   1  -3    4.35    0.34 
   4   1  -3    4.84    0.32 
   4   1  -3    3.96    0.28 
  -4   1   3    4.30    0.31 
  -3  -1   3    2.24    0.24 
  -3  -1   3    2.19    0.23 
   3  -1  -3    2.11    0.17 
   3  -1  -3    2.15    0.21 
   3   1  -3    1.82    0.19 
  -3   1   3    2.05    0.22 
   3   1  -3    1.77    0.22 
  -3   1   3    2.10    0.22 
   3   1  -3    2.27    0.23 
   2  -1  -3   72.58    2.20 
   2  -1  -3   68.67    2.18 
  -2  -1   3   69.41    2.22 
  -2  -1   3   69.93    2.20 
   2   1  -3   72.07    2.19 
  -2   1   3   70.69    2.20 
  -2   1   3   69.86    2.22 
   2   1  -3   71.47    2.17 
   2   1  -3   72.16    2.22 
   1  -1  -3  306.85    9.03 
   1  -1  -3  297.10    9.02 
  -1  -1   3  317.55    9.03 
  -1  -1   3  305.59    9.04 
   1   1  -3  308.85    9.02 
  -1   1   3  311.53    9.05 
   1   1  -3  311.13    9.01 
  -1   1   3  310.25    9.04 
   0  -1   3   88.37    2.66 
   0  -1   3   86.78    2.60 
   0  -1   3   86.87    2.65 
   0  -1  -3   87.54    2.69 
   0  -1   3   87.74    2.63 
   0  -1  -3   90.85    2.70 
   0   1   3   87.87    2.66 
   0   1   3   89.27    2.70 
   0   1   3   87.55    2.70 
   0   1  -3   88.87    2.66 
   1  -1   3  154.42    4.58 
   1  -1   3  150.85    4.64 
   1  -1   3  155.67    4.64 
  -1  -1  -3  161.51    4.71 
   1  -1   3  155.00    4.66 
  -1  -1  -3  156.13    4.69 
   1   1   3  155.76    4.65 
  -1   1  -3  157.45    4.64 
   1   1   3  151.33    4.69 
   1   1   3  156.37    4.71 
   2  -1   3   24.97    0.86 
   2  -1   3   24.32    0.92 
   2  -1   3   24.45    0.92 
   2  -1   3   24.04    0.92 
  -2  -1  -3   24.03    0.95 
  -2  -1  -3   25.74    0.95 
   2   1   3   23.39    0.96 
   2   1   3   24.11    0.96 
  -2   1  -3   24.76    0.89 
   2   1   3   24.08    0.90 
   3  -1   3    0.39    0.13 
   3  -1   3    0.16    0.10 
   3  -1   3    0.06    0.07 
   3  -1   3    0.21    0.10 
  -3  -1  -3    0.36    0.13 
  -3  -1  -3    0.28    0.11 
   3   1   3    0.14    0.10 
   3   1   3    0.27    0.11 
  -3   1  -3    0.22    0.10 
   3   1   3    0.15    0.10 
   4  -1   3   37.85    1.44 
  -4  -1  -3   38.83    1.45 
   4  -1   3   38.62    1.41 
  -4  -1  -3   37.58    1.47 
   4  -1   3   39.37    1.49 
   4  -1   3   37.26    1.43 
   4   1   3   36.92    1.43 
  -4   1  -3   37.97    1.42 
  -4   1  -3   39.27    1.39 
   4   1   3   38.78    1.49 
   4   1   3   38.45    1.48 
  -5  -1  -3    1.35    0.27 
   5  -1   3    1.64    0.28 
   5  -1   3    1.29    0.26 
   5  -1   3    1.11    0.24 
  -5  -1  -3    1.37    0.26 
   5   1   3    1.49    0.27 
   5   1   3    1.06    0.24 
  -5   1  -3    1.31    0.24 
   5   1   3    1.57    0.29 
  -5   1  -3    1.49    0.25 
   6  -1   3    8.27    0.57 
   6  -1   3   10.08    0.63 
  -6  -1  -3    8.52    0.59 
  -6  -1  -3    8.90    0.59 
   6  -1   3    9.61    0.61 
   6   1   3    9.77    0.64 
   6   1   3    7.86    0.58 
  -6   1  -3    7.79    0.53 
   6   1   3    8.89    0.62 
  -6   1  -3    8.09    0.56 
   7  -1   3    1.73    0.34 
  -7  -1  -3    1.20    0.30 
   7  -1   3    1.27    0.31 
   7  -1   3    1.15    0.28 
  -7  -1  -3    1.63    0.33 
  -7   1  -3    0.99    0.26 
   7   1   3    1.24    0.30 
   7   1   3    1.68    0.36 
   7   1   3    1.05    0.29 
  -7   1  -3    1.41    0.29 
  -8  -1  -3    1.70    0.37 
   8  -1   3    2.18    0.40 
   8  -1   3    1.76    0.34 
  -8  -1  -3    1.71    0.35 
   8  -1   3    1.63    0.37 
  -8   1  -3    2.12    0.39 
   8   1   3    0.46    0.23 
   8   1   3    1.74    0.35 
  -8   1  -3    2.43    0.42 
   8   1   3    2.53    0.44 
  -9  -1  -3    1.75    0.40 
   9  -1   3    1.65    0.36 
   9  -1   3    1.44    0.38 
   9  -1   3    1.49    0.34 
  -9   1  -3    0.94    0.29 
   9   1   3    1.37    0.38 
   9   1   3    1.62    0.38 
   9   1   3    1.53    0.37 
  10  -1   3    2.00    0.43 
 -10  -1  -3    2.05    0.43 
  10  -1   3    1.91    0.45 
  10  -1   3    2.09    0.42 
  10   1   3    1.54    0.39
[truncated: 969,186 more chars]
